# Supplementary material for: Airborne limb-imaging measurements of temperature, HNO 3 , O 3 , ClONO 2 , H 2 O and CFC-12 during the Arctic winter 2015/2016: characterization, in situ validation and comparison to Aura/MLS
Source: Copernicus journal article supplement (doi:10.5194/amt-11-4737-2018), 2018-08-14

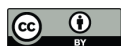

*Supplement of*

**Airborne limb-imaging measurements of temperature,  $\text{HNO}_3$ ,  $\text{O}_3$ ,  $\text{ClONO}_2$ ,  $\text{H}_2\text{O}$  and CFC-12 during the Arctic winter 2015/2016: characterization, in situ validation and comparison to Aura/MLS**

**Sören Johansson et al.**

*Correspondence to:* Sören Johansson ([soeren.johansson@kit.edu](mailto:soeren.johansson@kit.edu))

The copyright of individual parts of the supplement might differ from the CC BY 4.0 License.

*Explanation for the following figures:*

First rows: Cross section of retrieved quantity (the flight altitude is marked with a grey line, the ECMWF potential vorticities of 2 and 4 PVU are marked with magenta dashed lines). Middle row (for  $\text{HNO}_3$  and  $\text{O}_3$ ): Cross section of MLS trace gas data interpolated to the GLORIA tangent points and above the aircraft. Regions with no corresponding GLORIA measurement are marked by fainter colors. Last row: Cross sections of total estimated error, vertical resolution and comparison of the GLORIA measurements of the retrieval grid point closest to flight altitude (green) to the corresponding in-situ measurement (blue).

The flight day is written on the top left plot and the retrieved quantity is marked at the colorbar of this plot

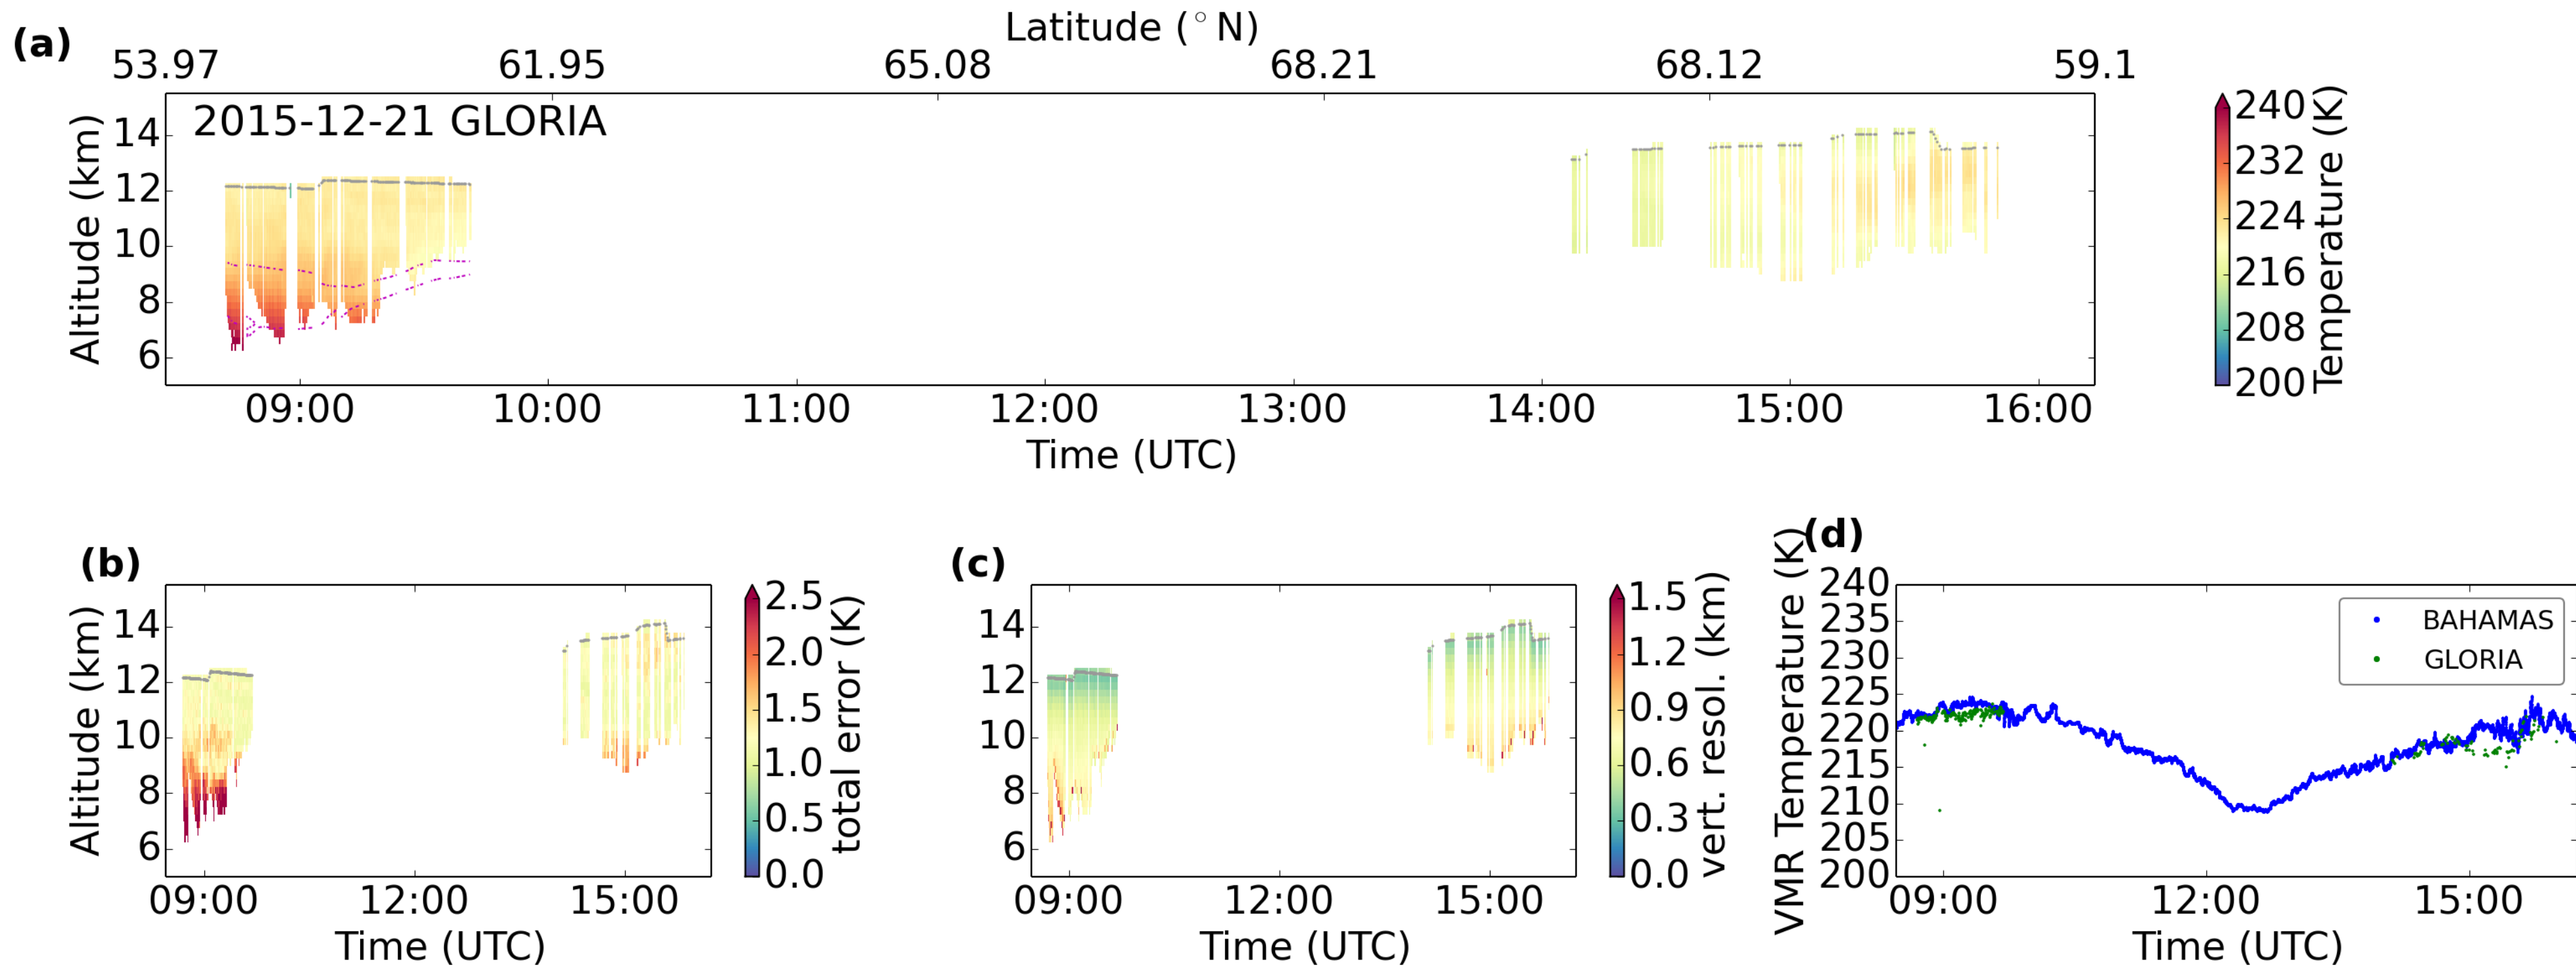

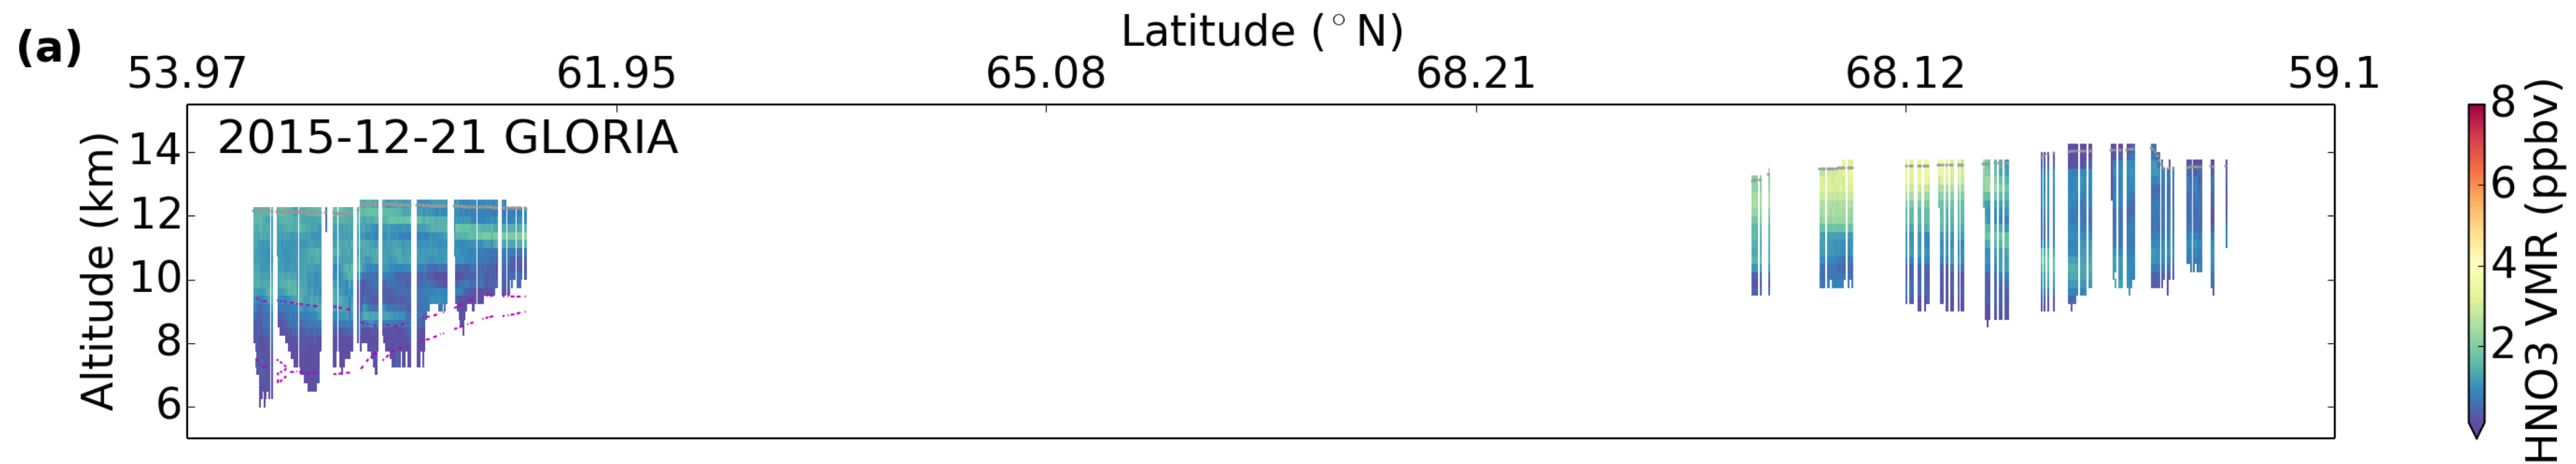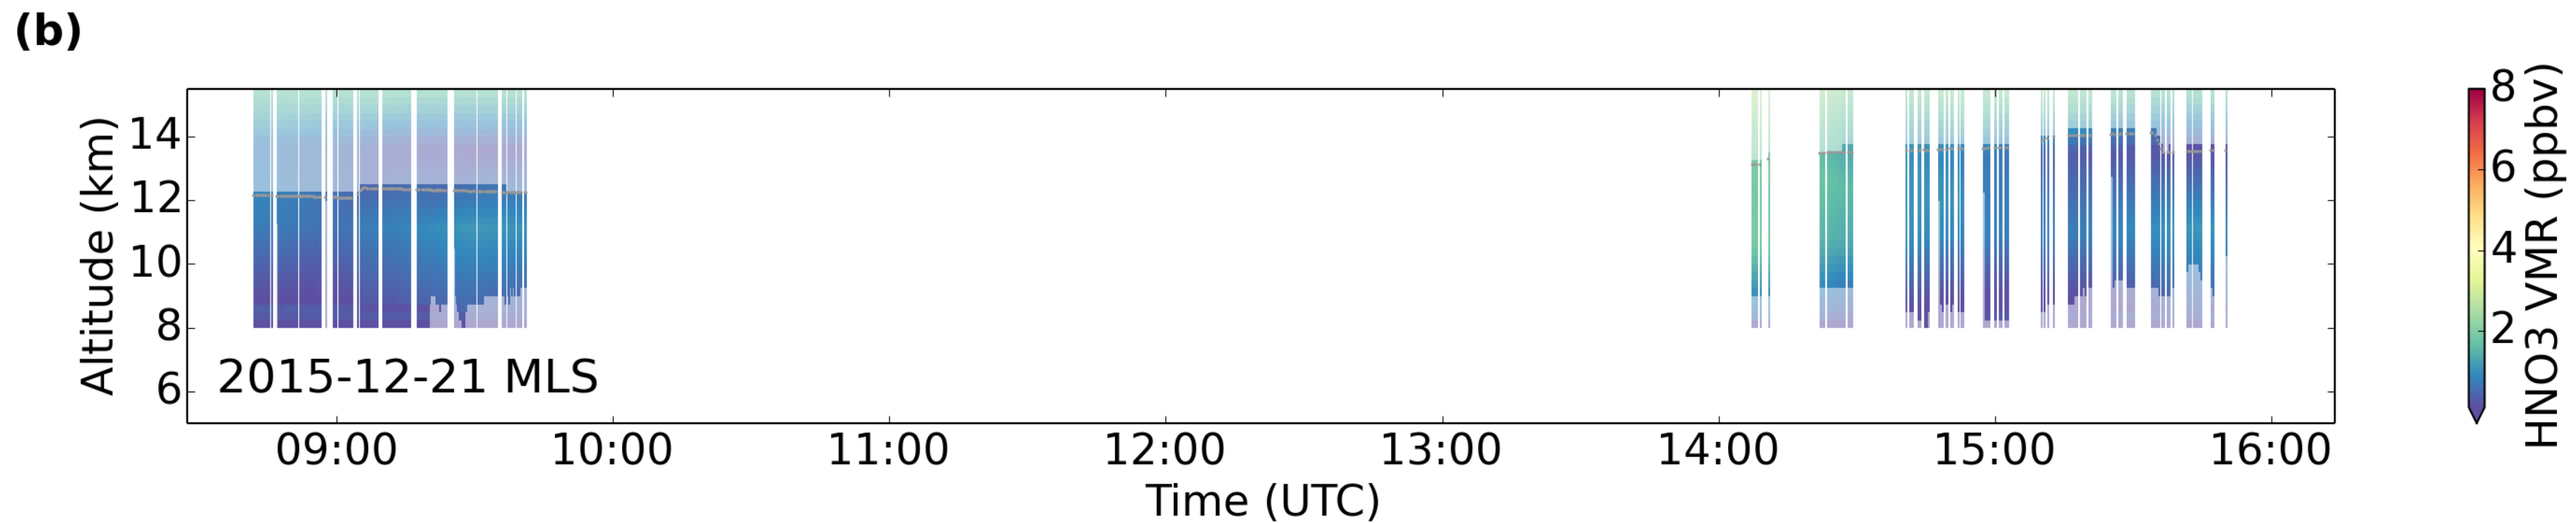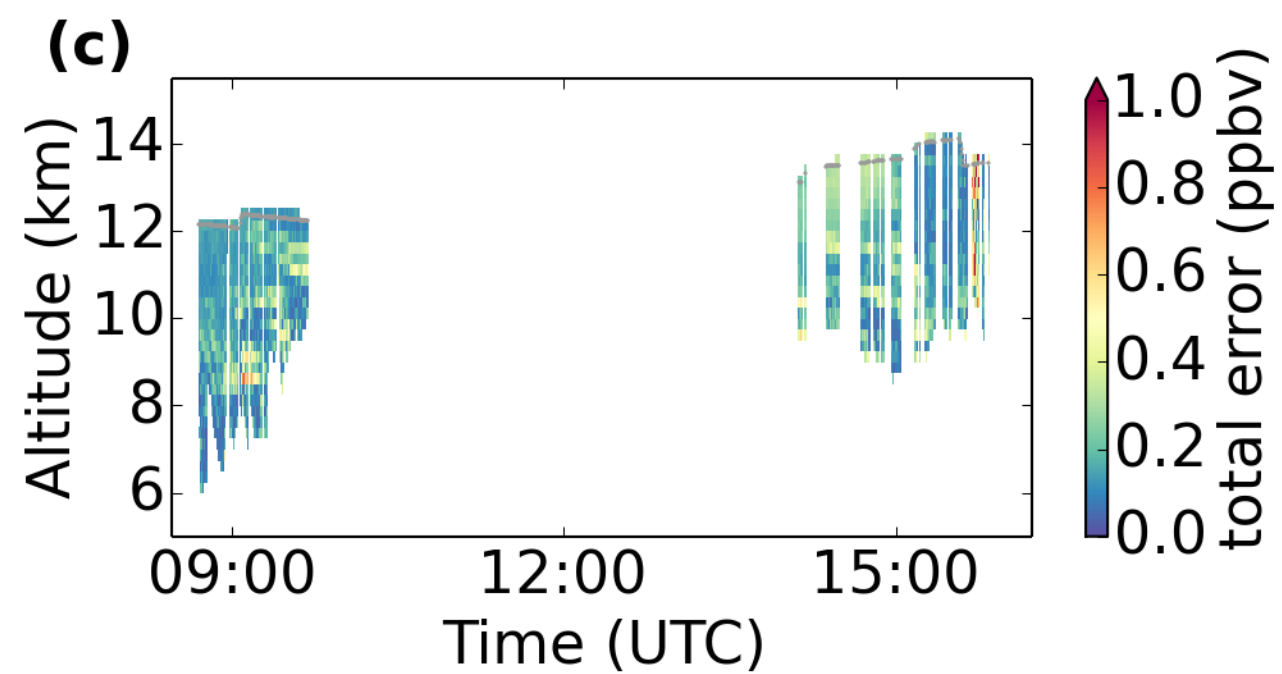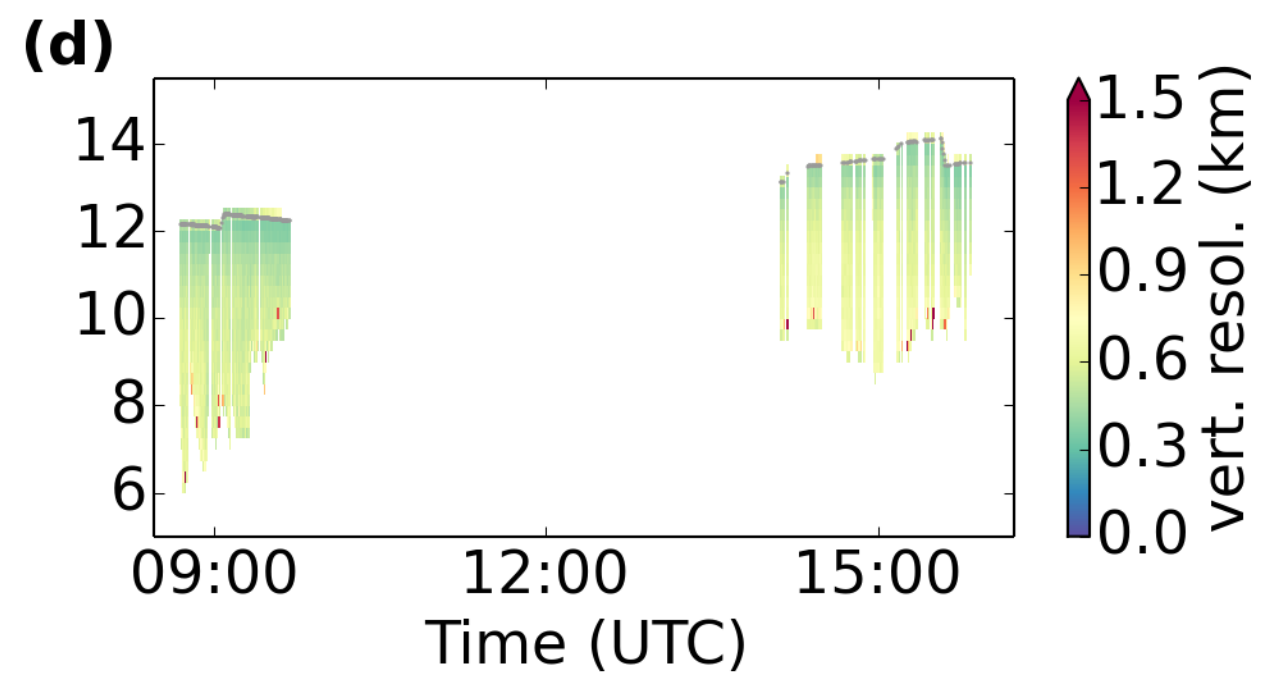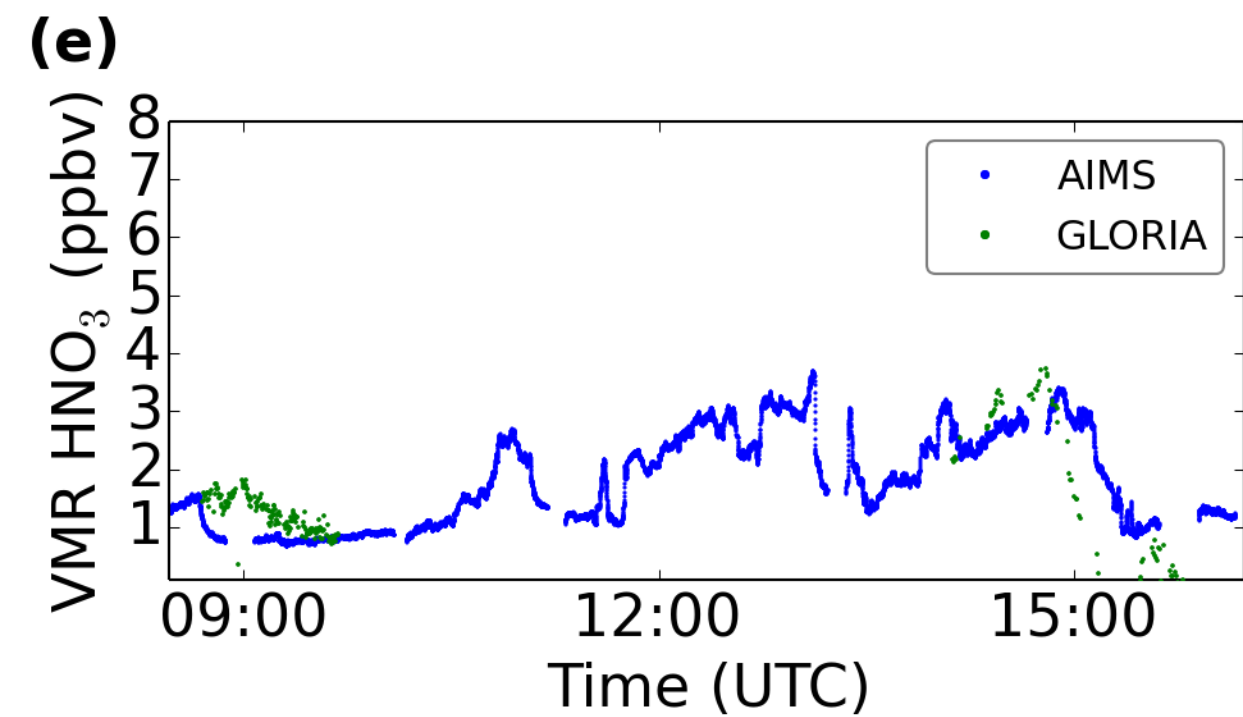



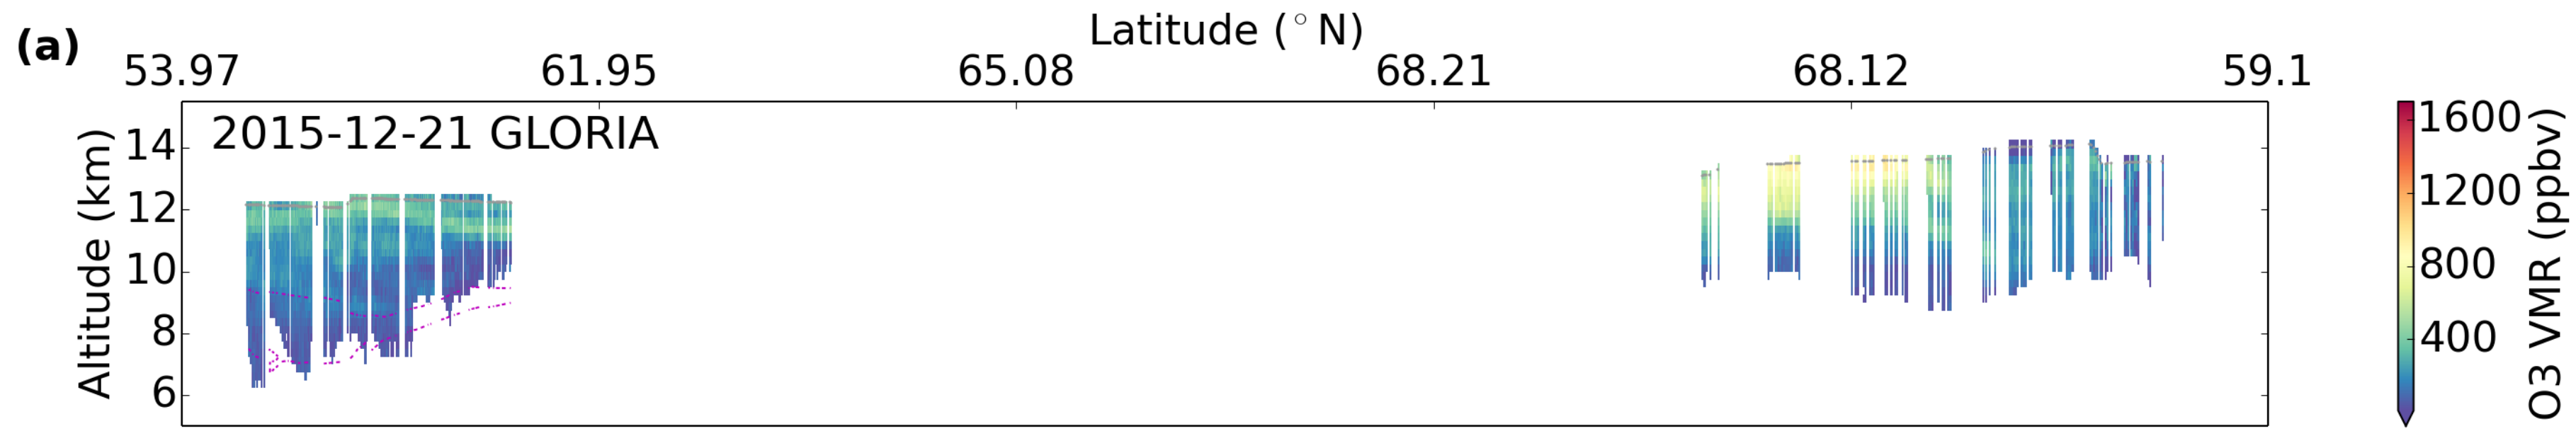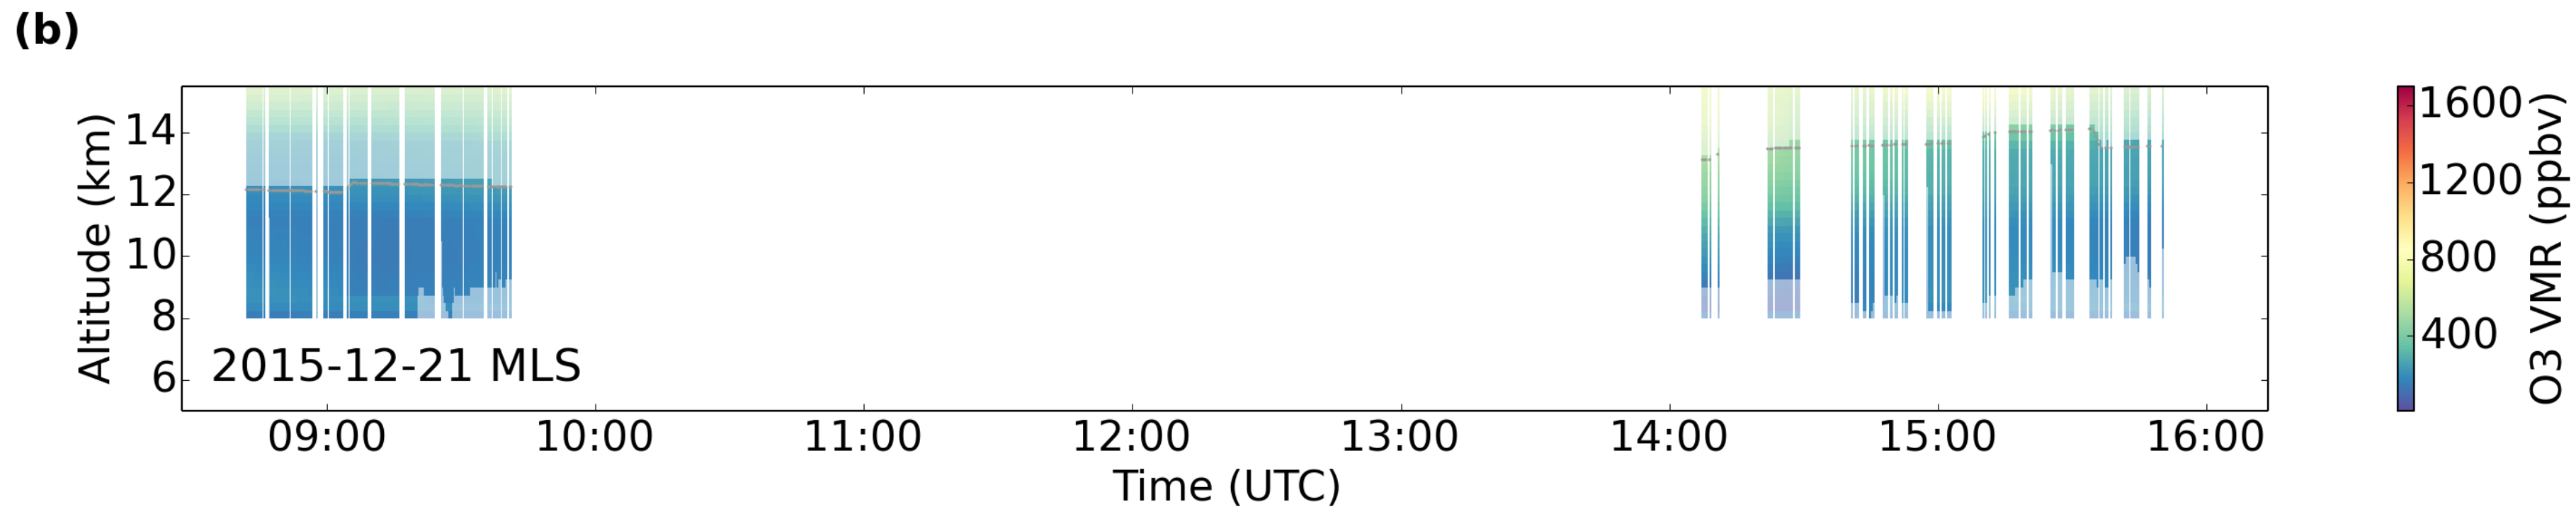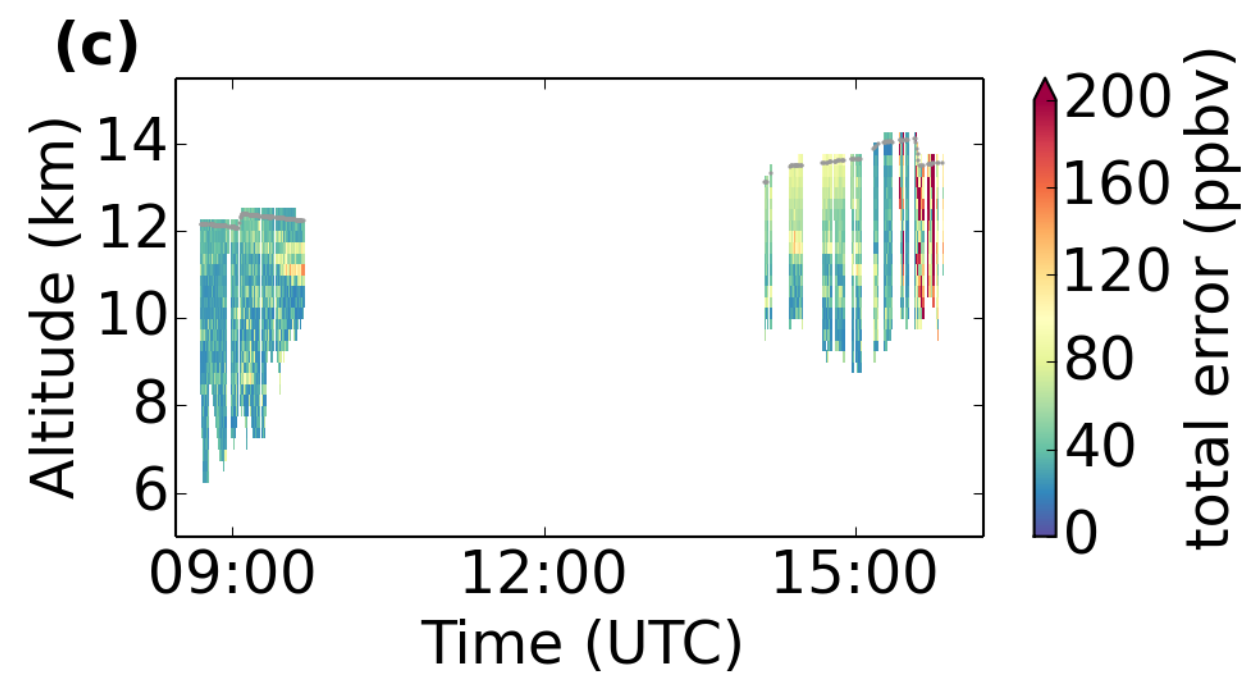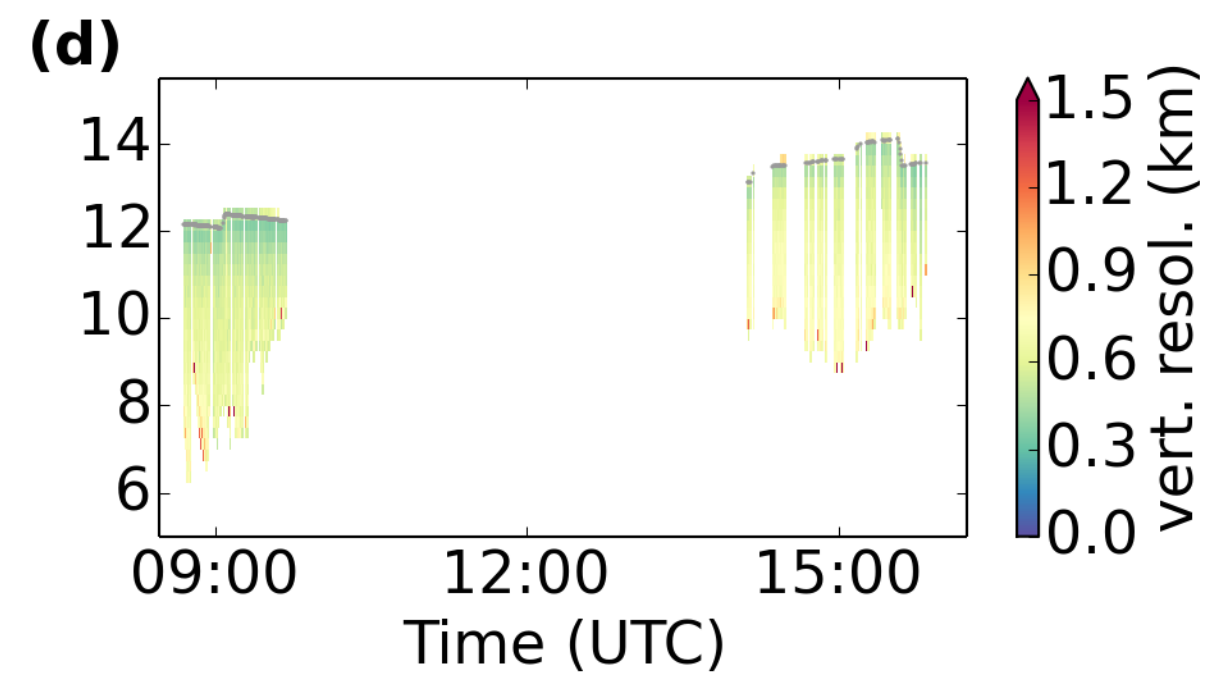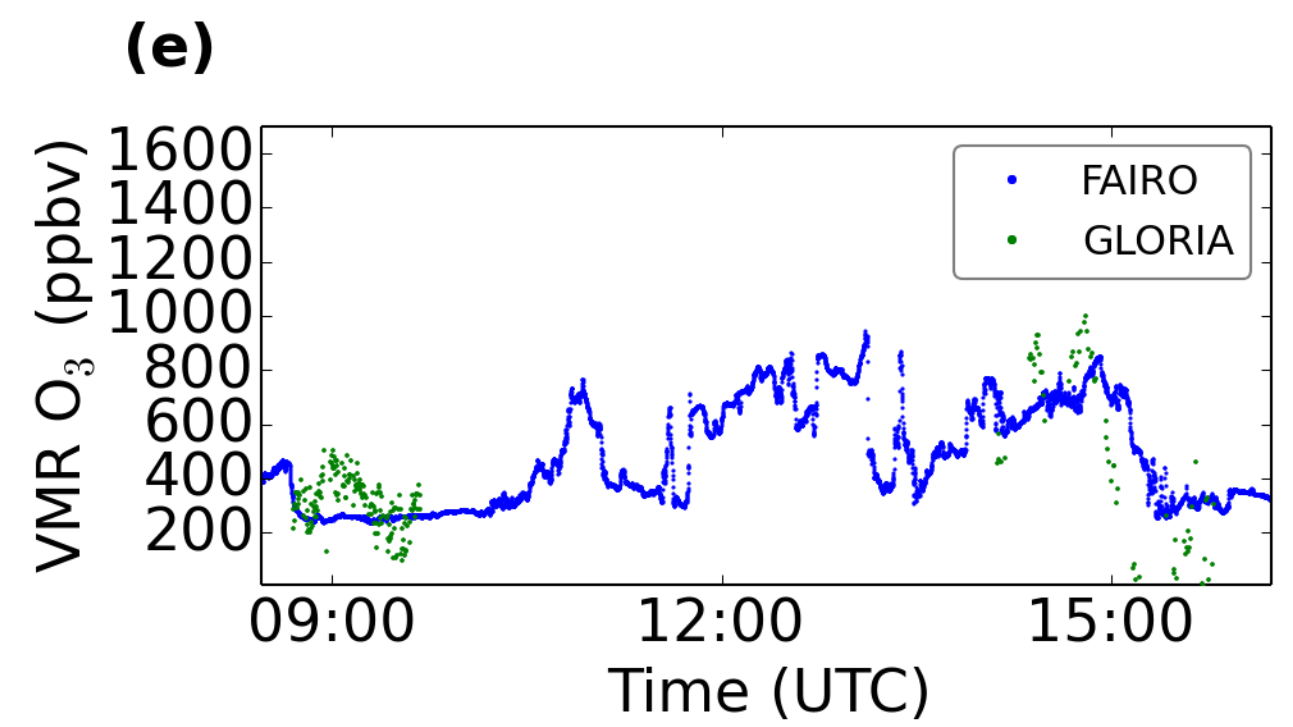

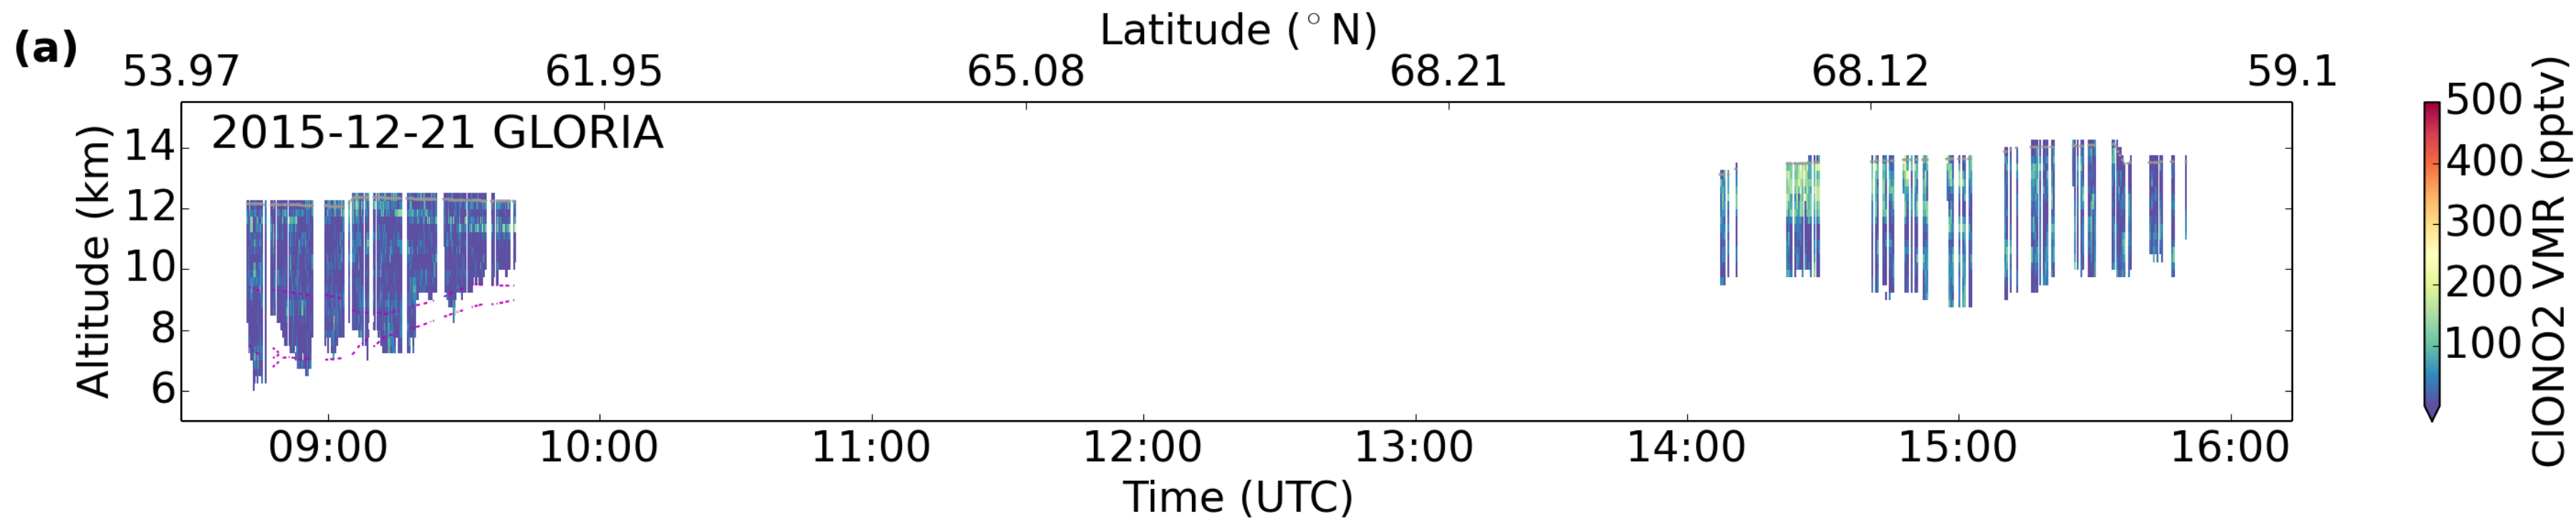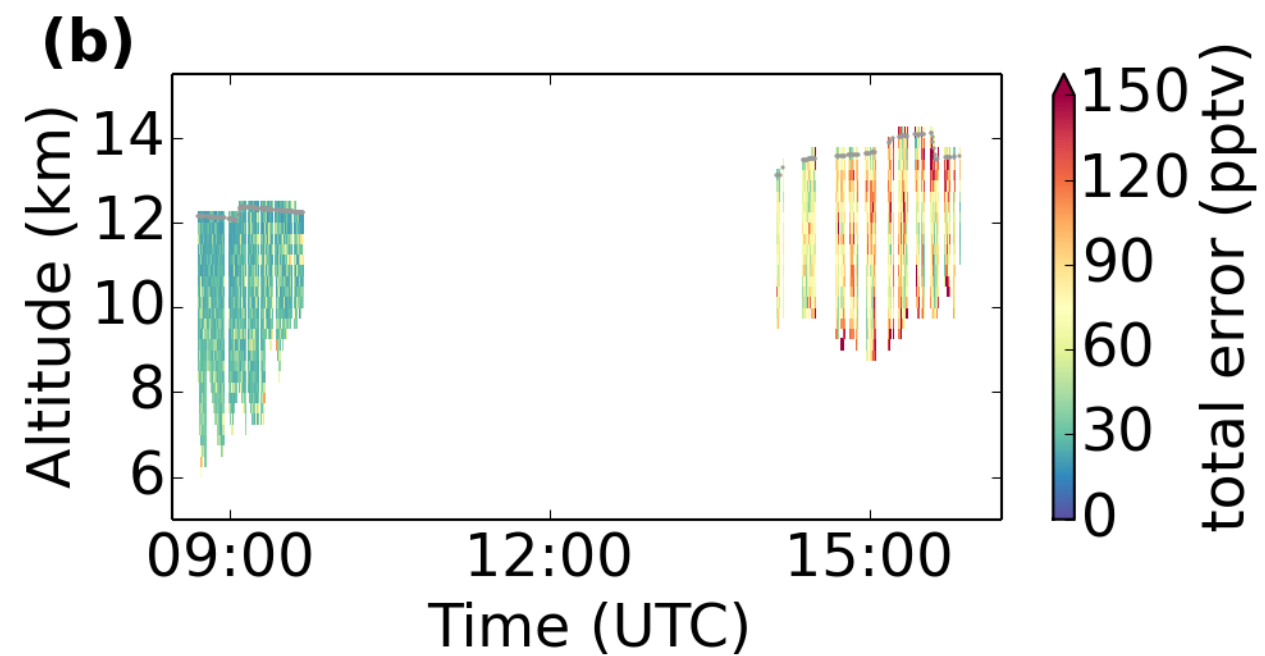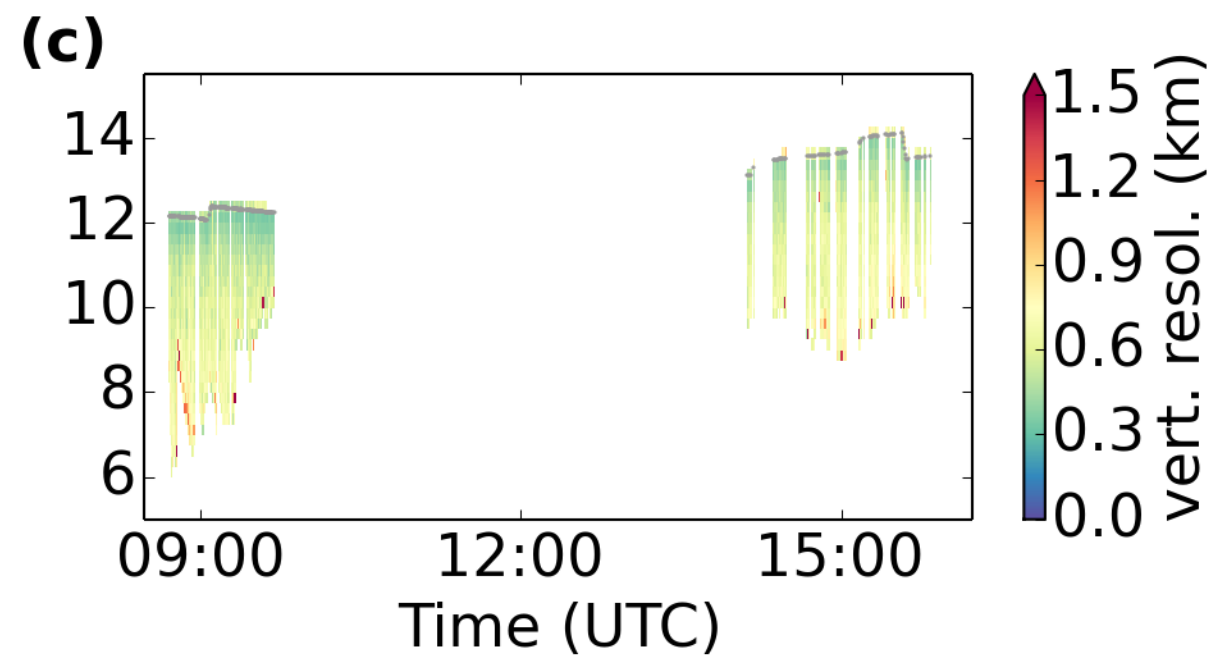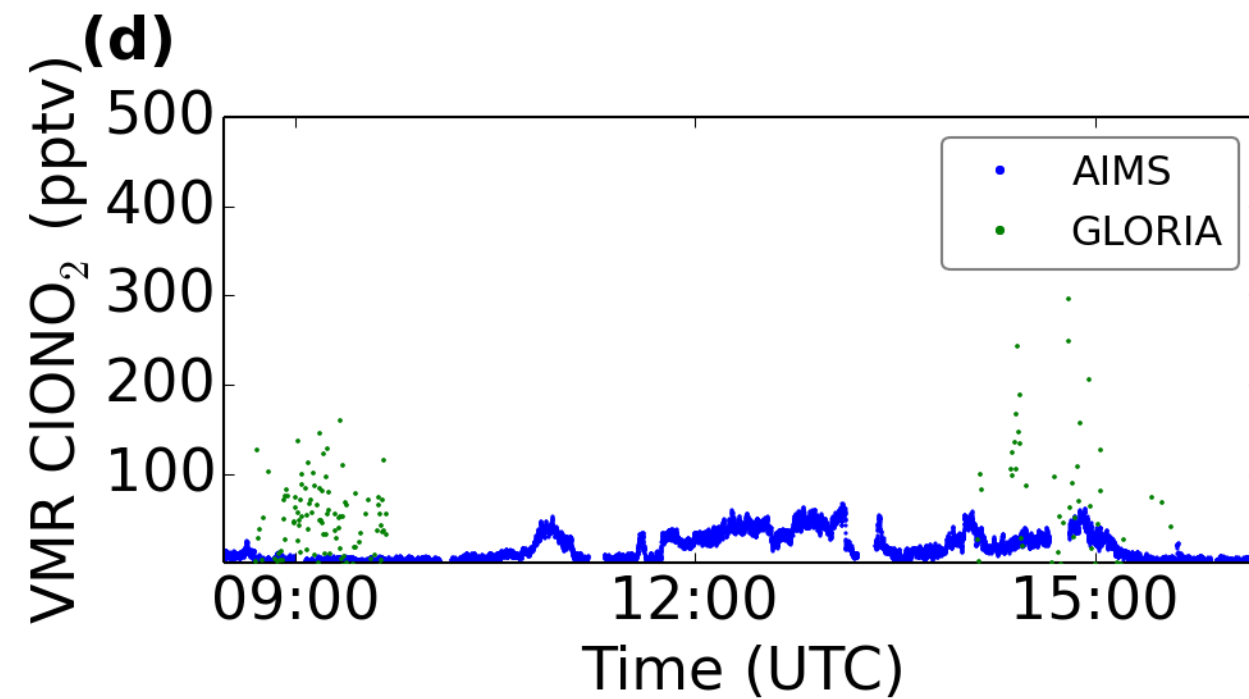

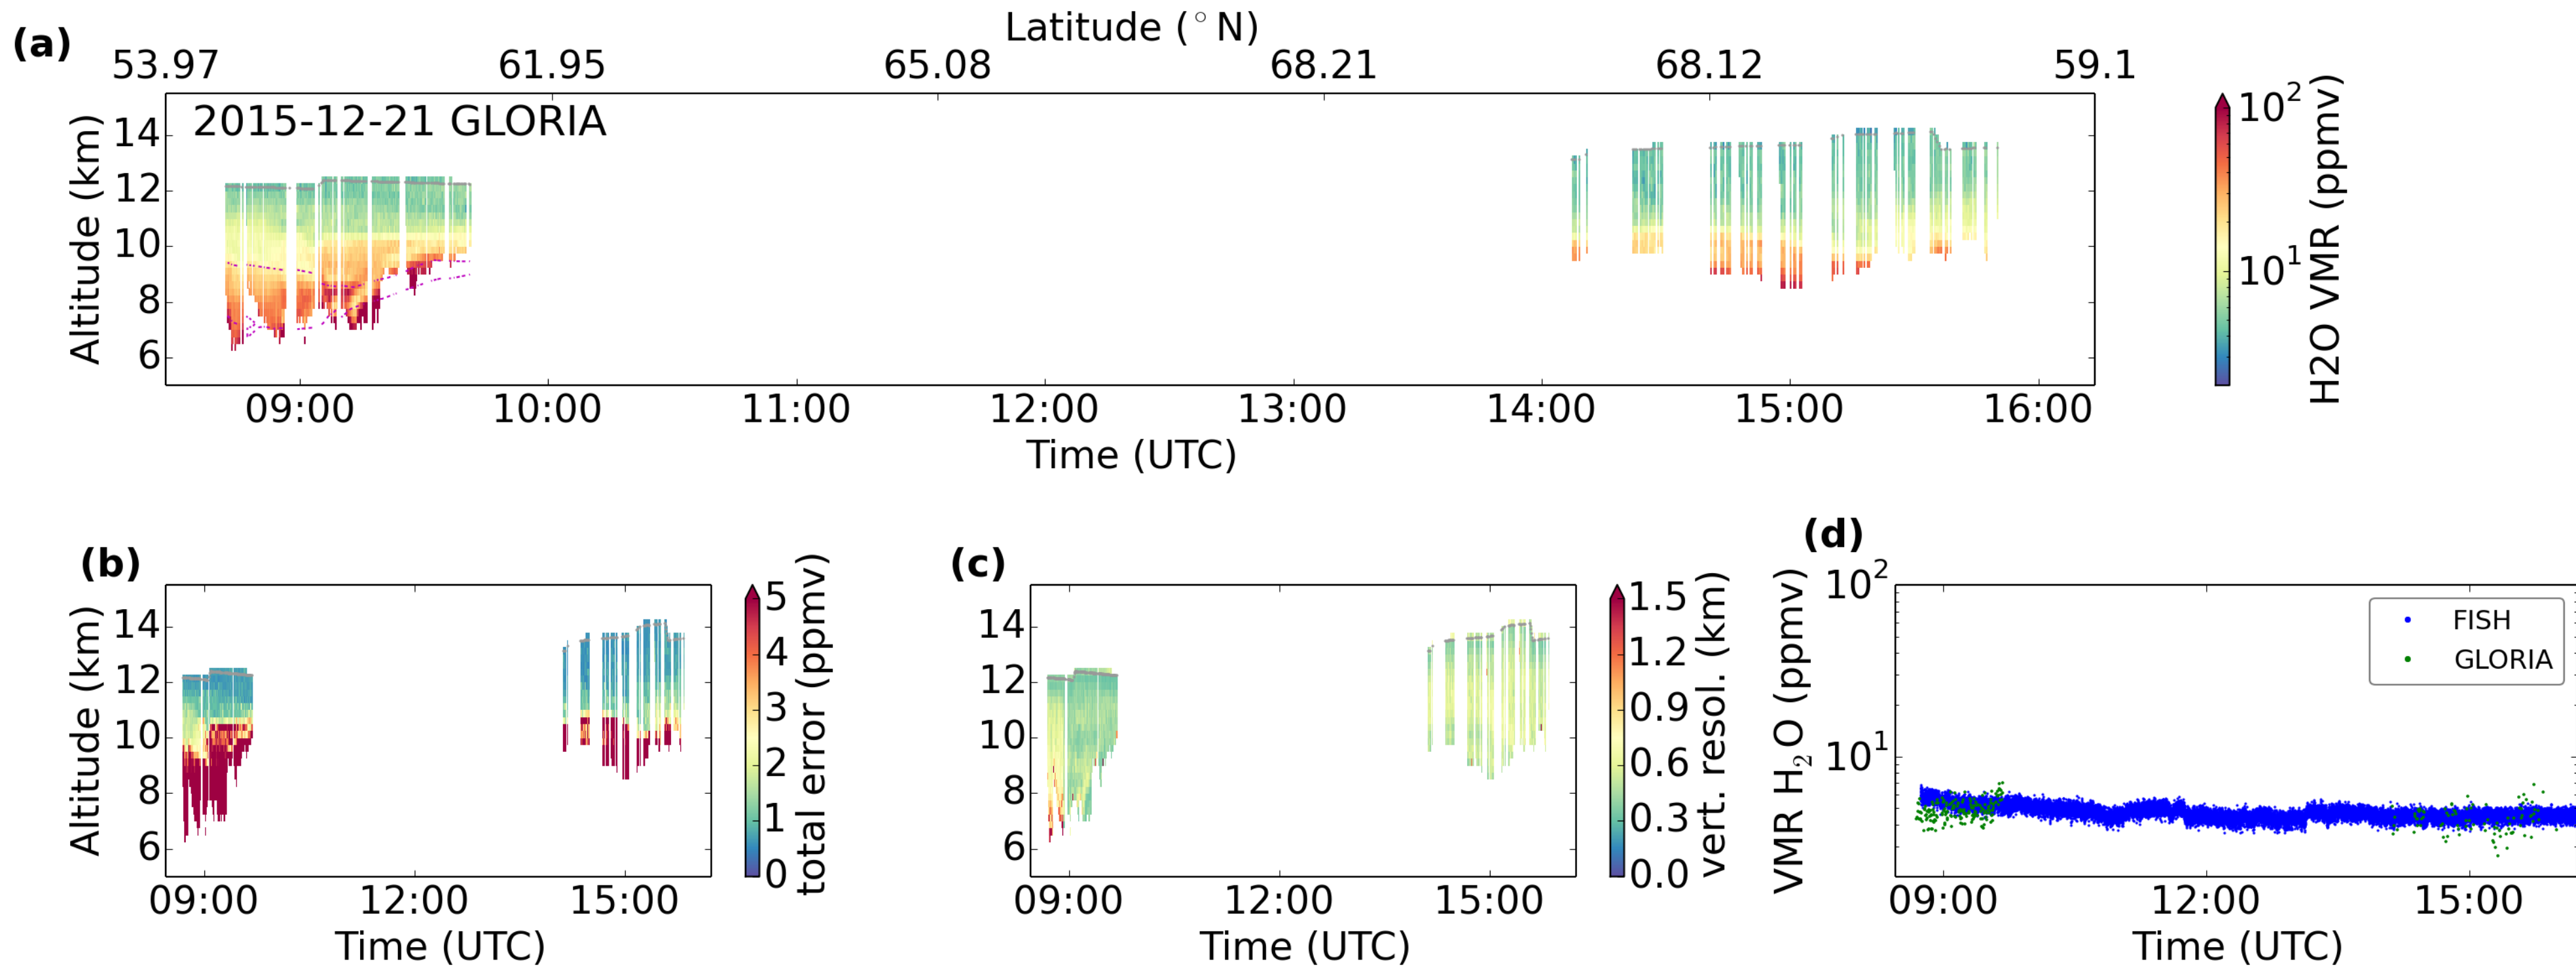

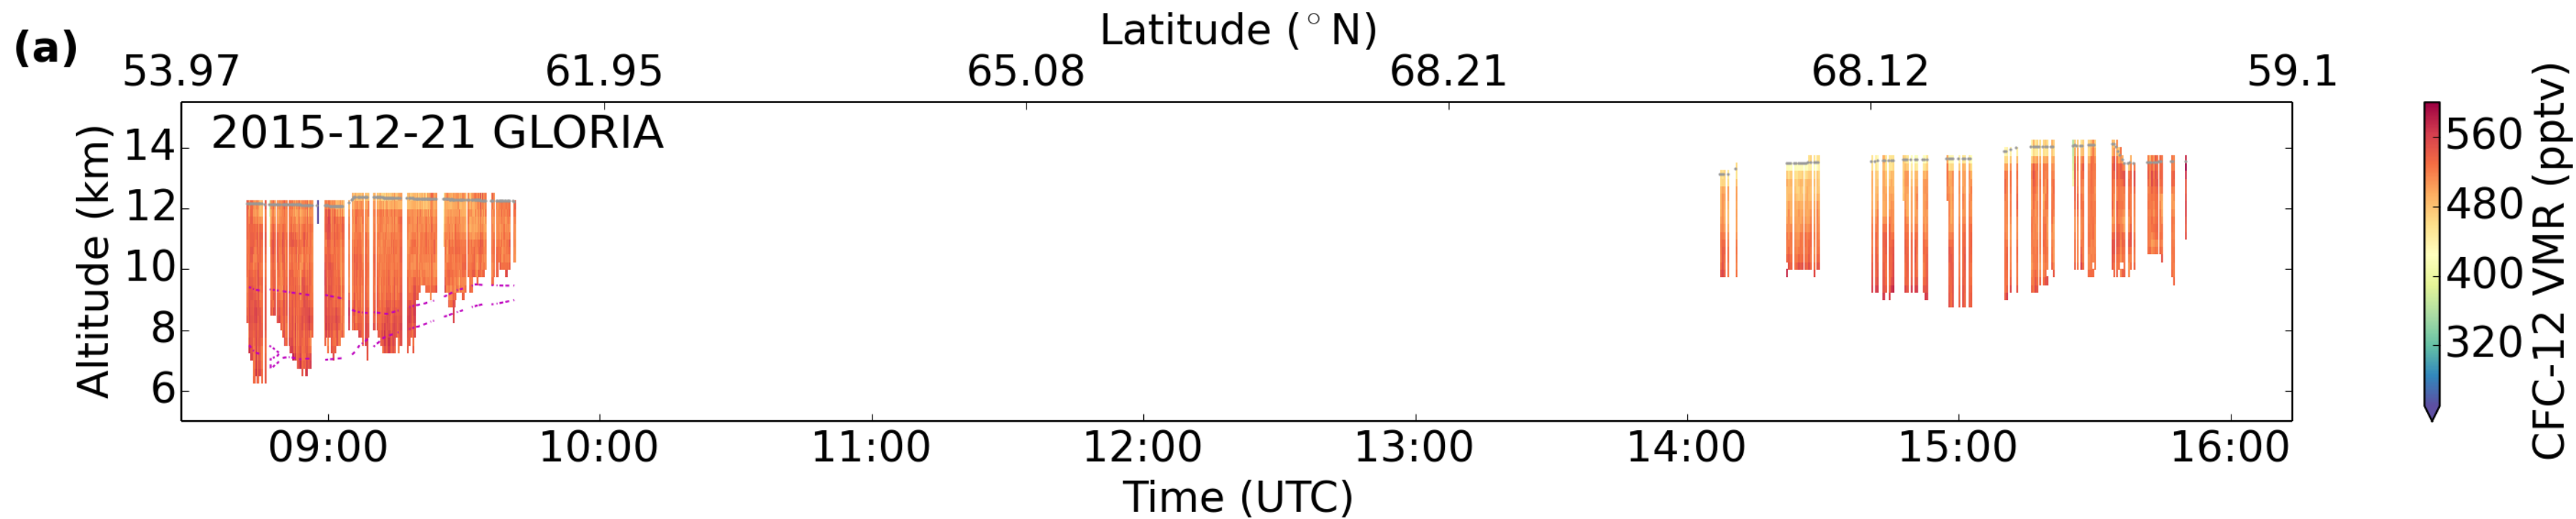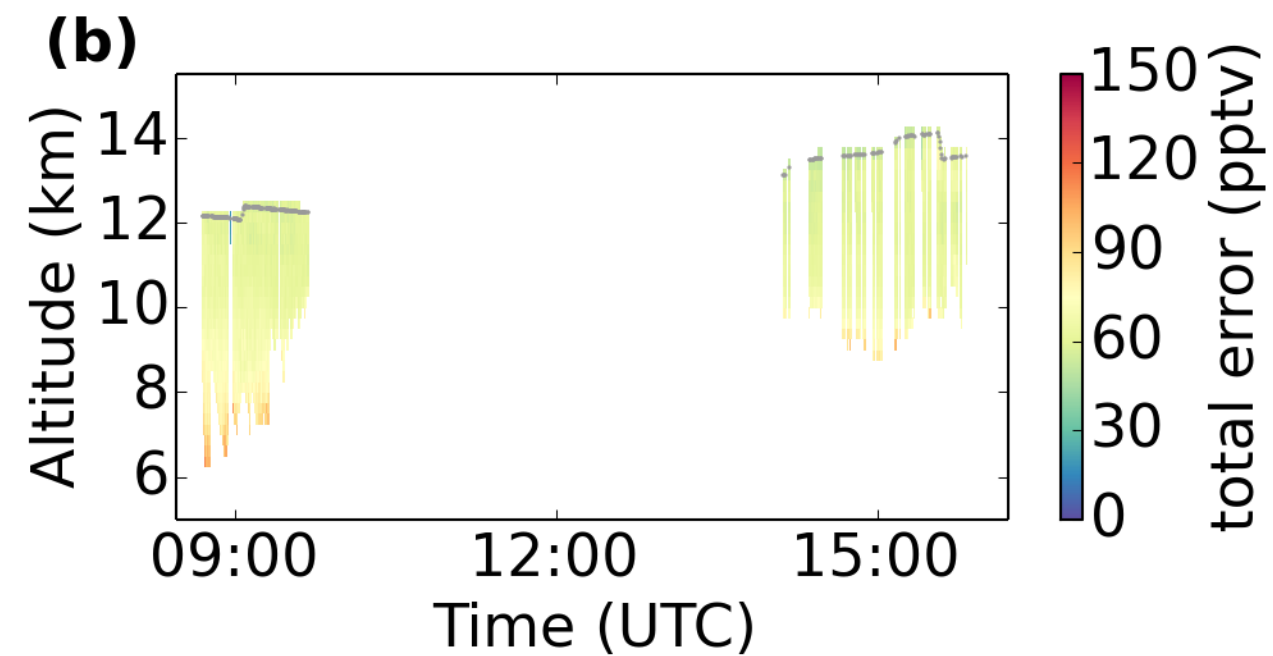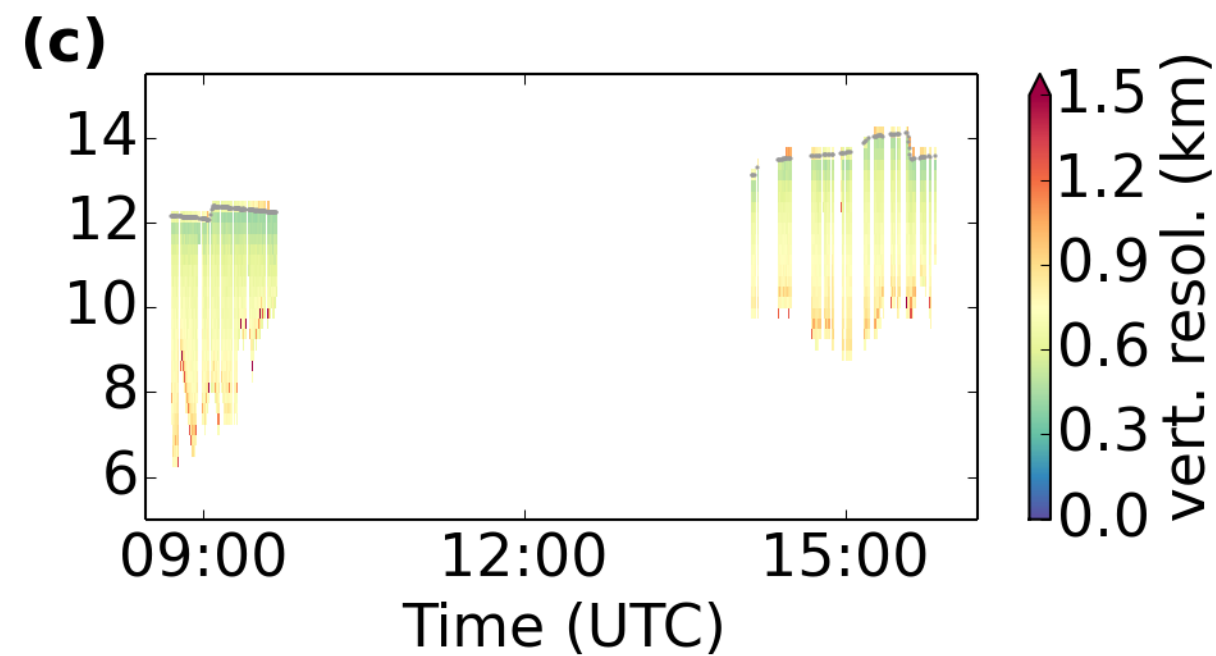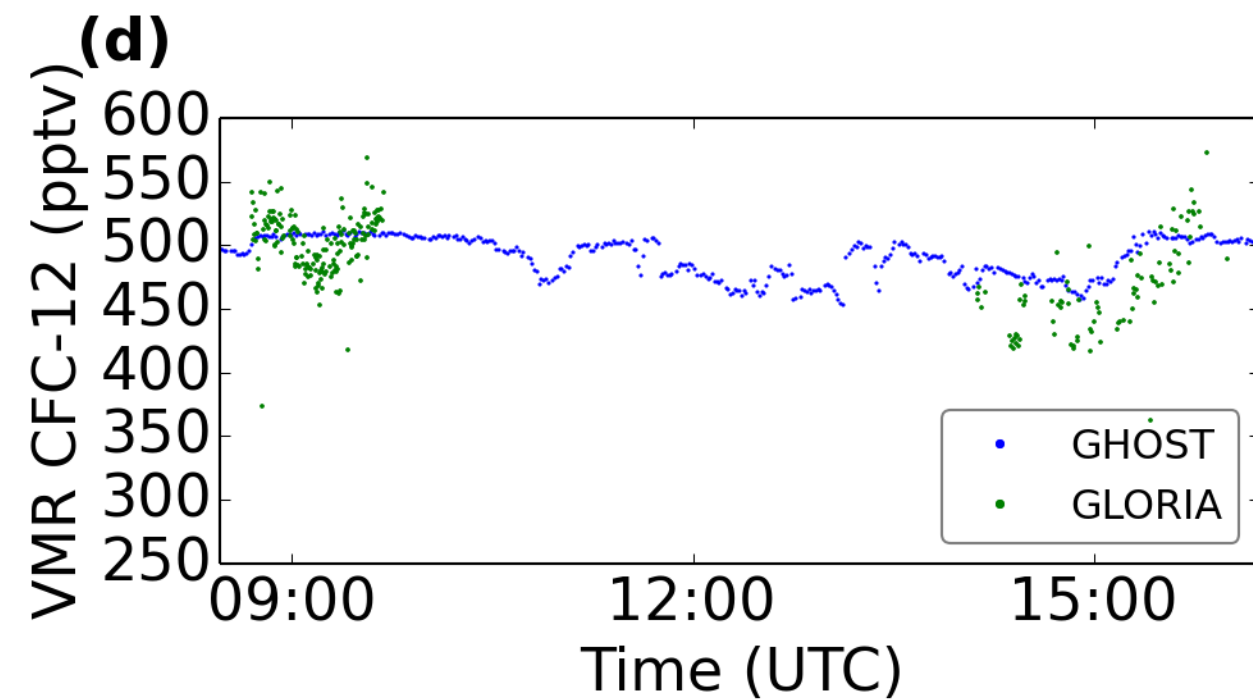

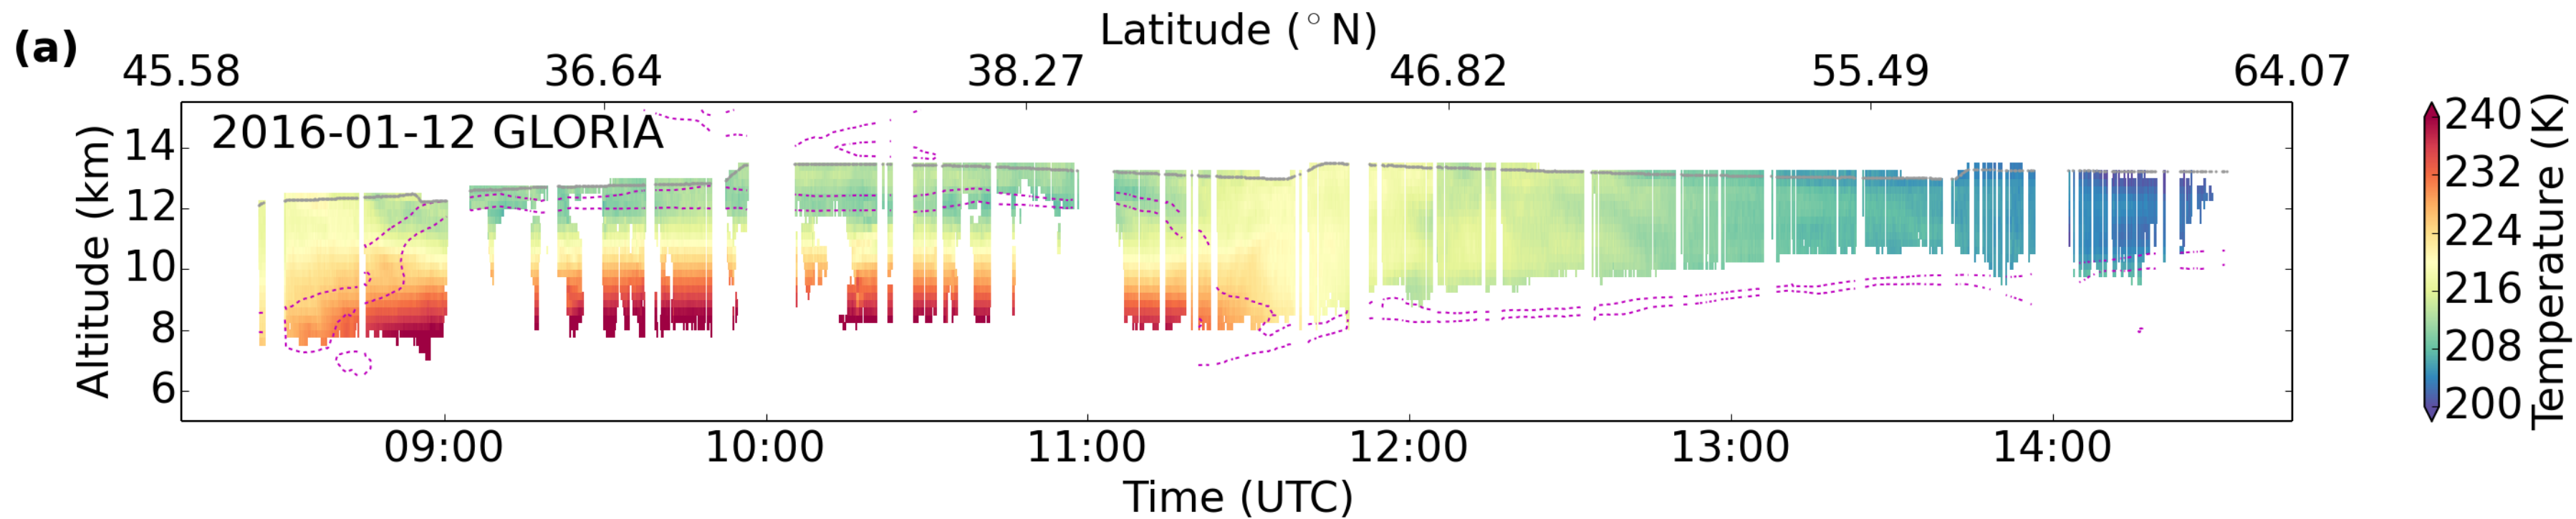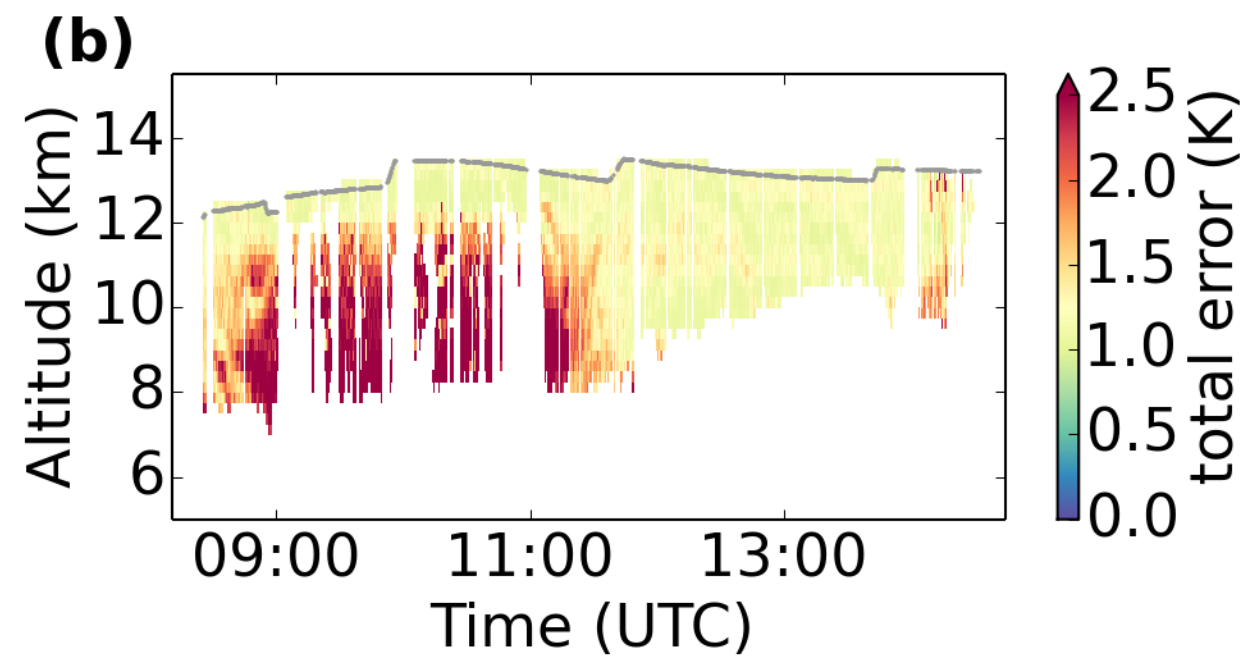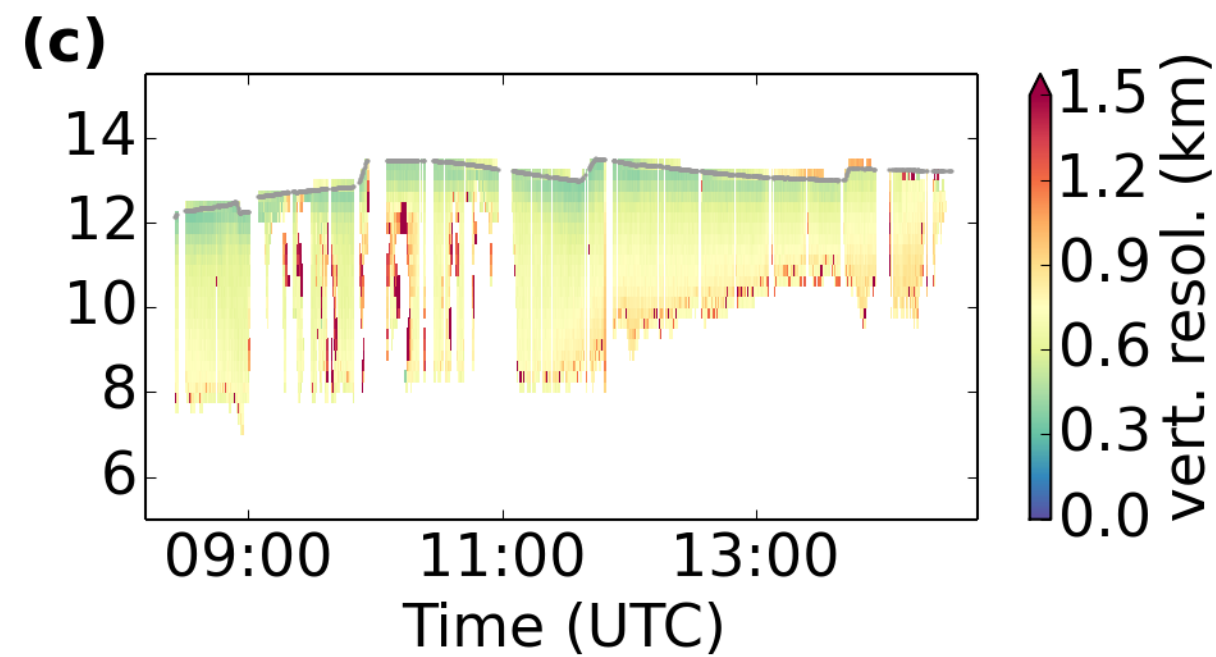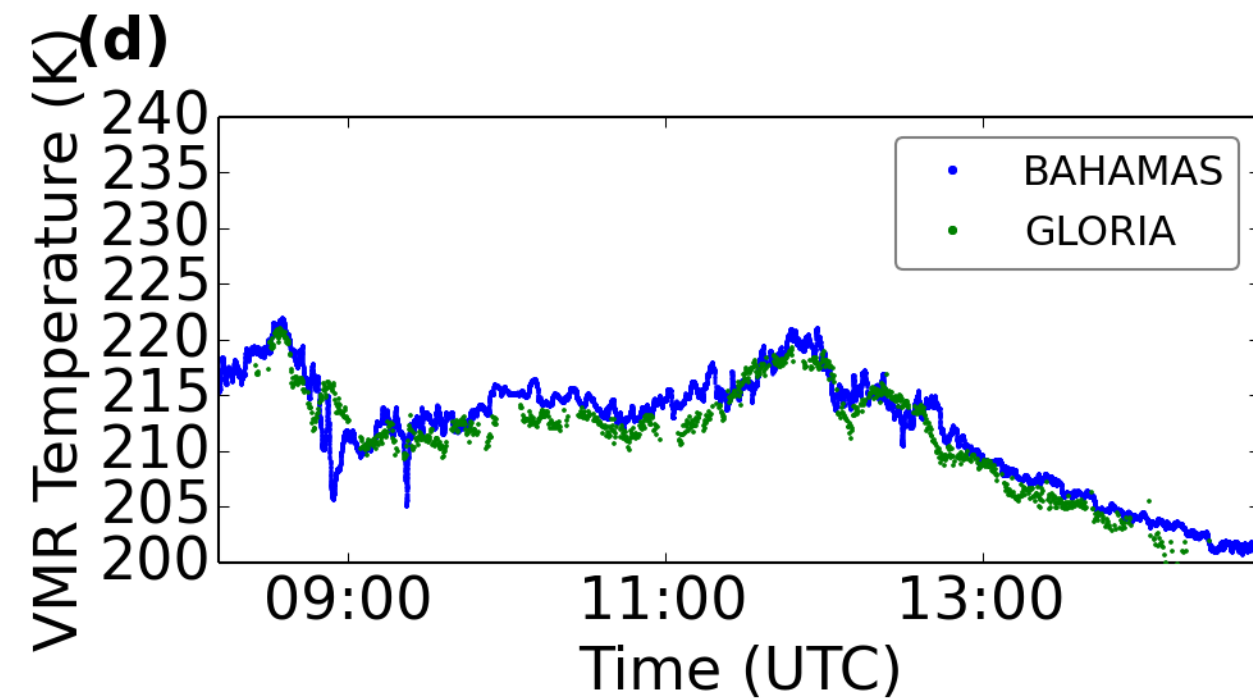



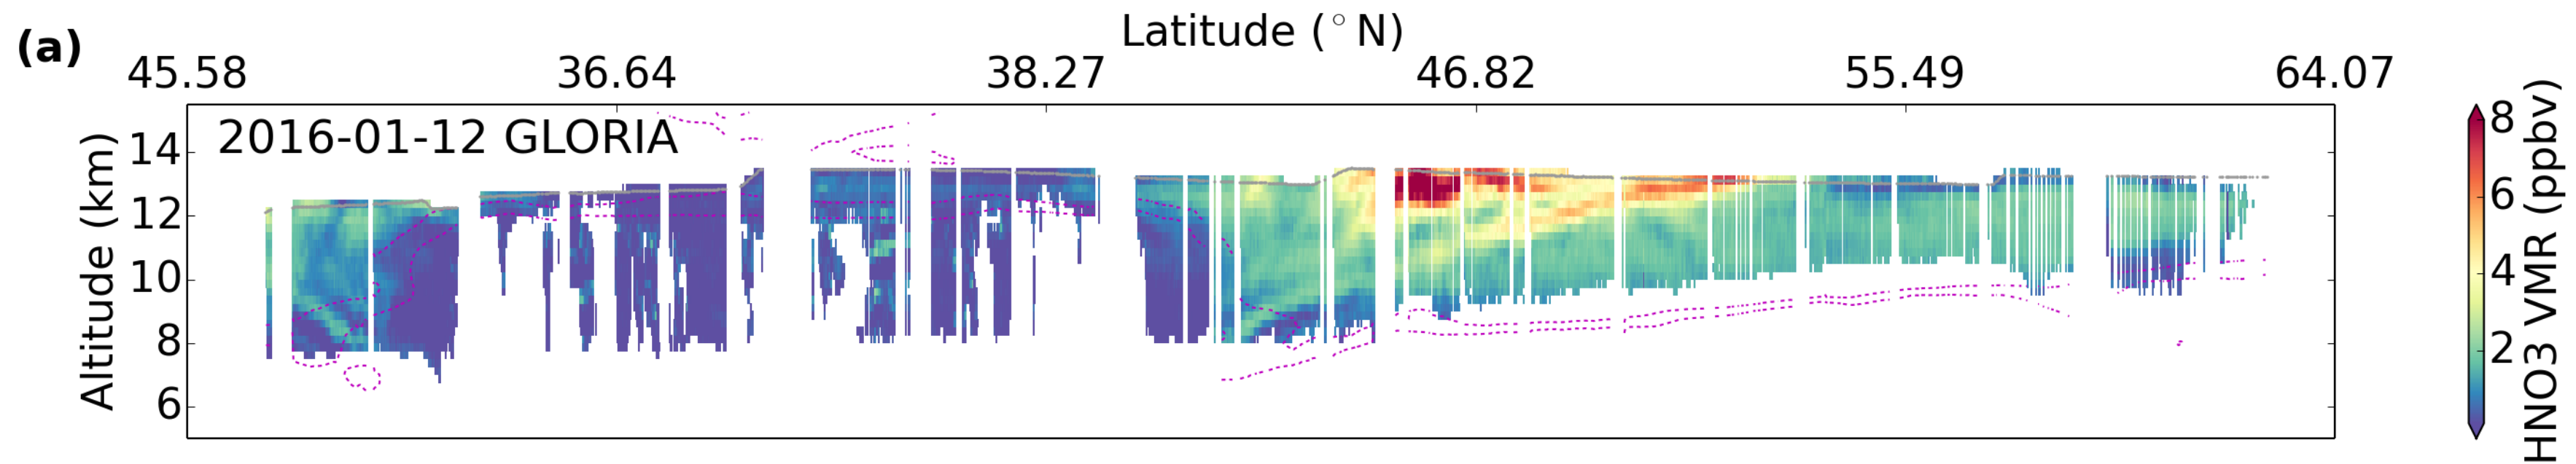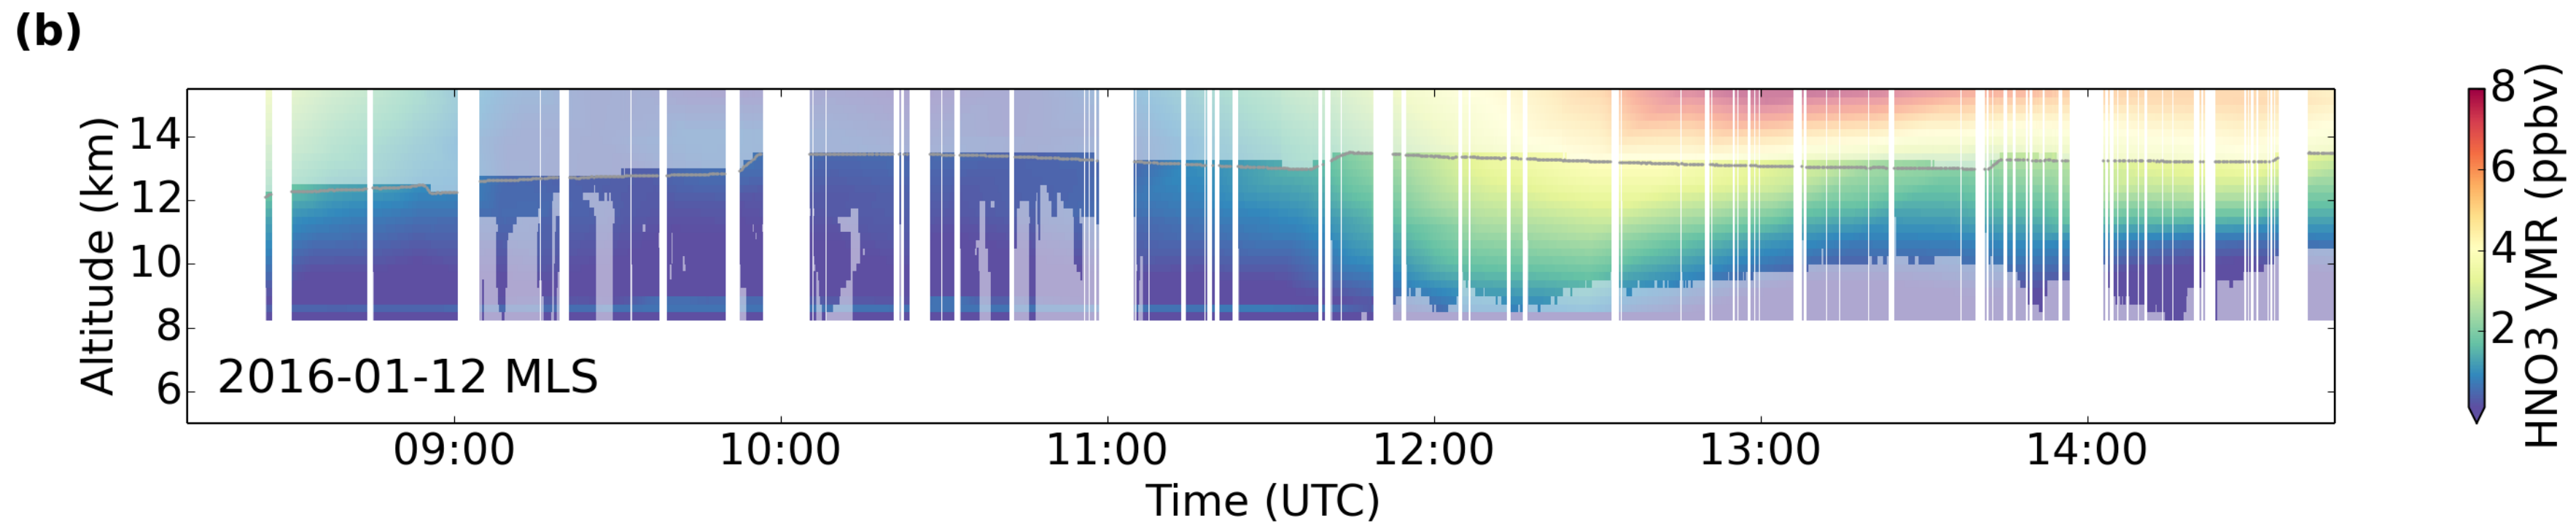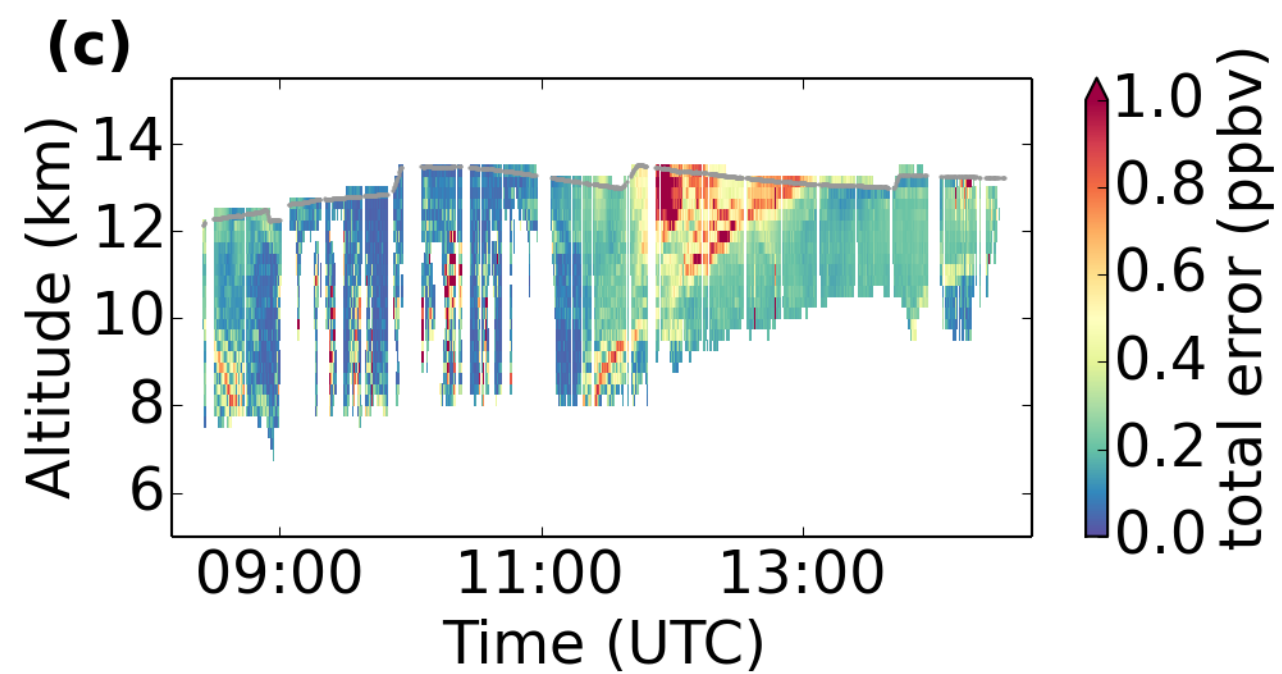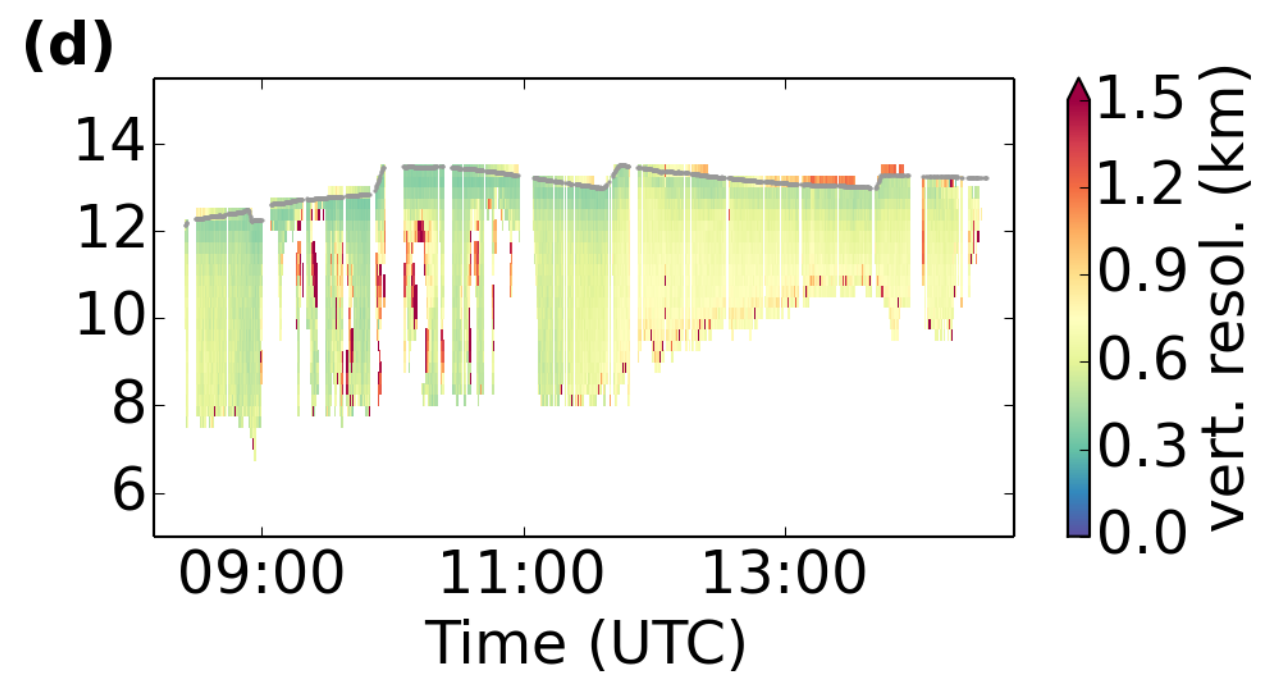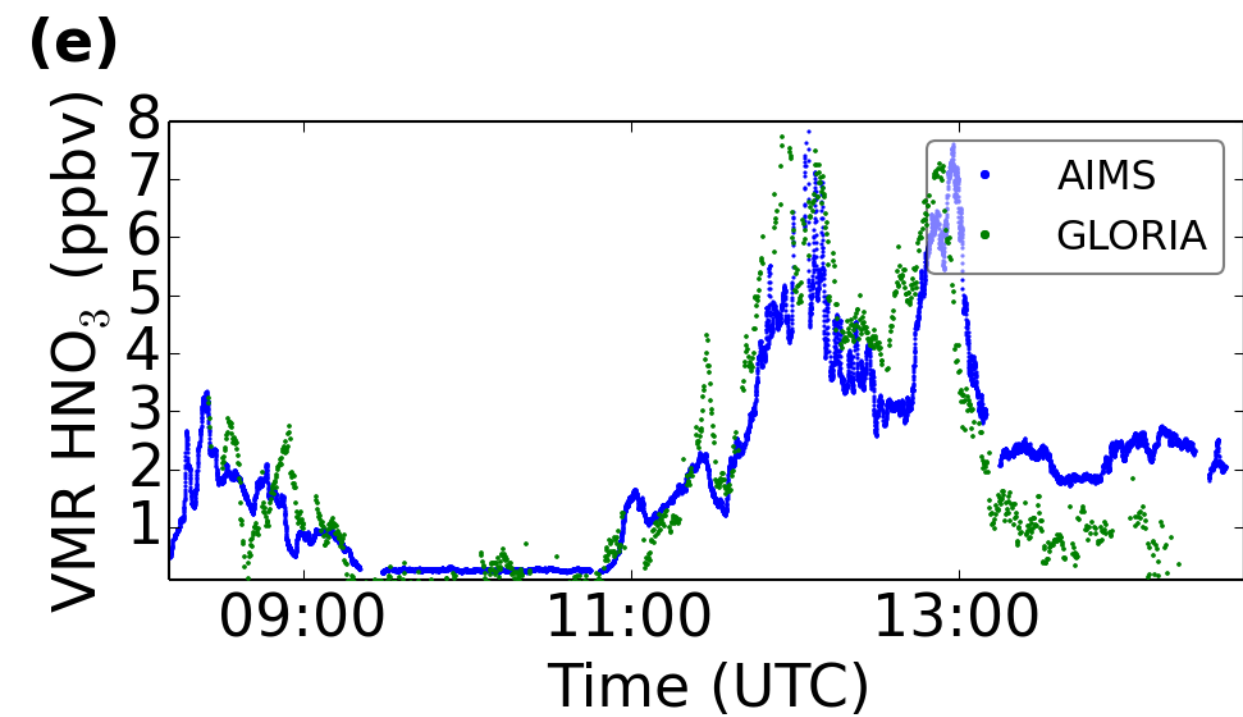

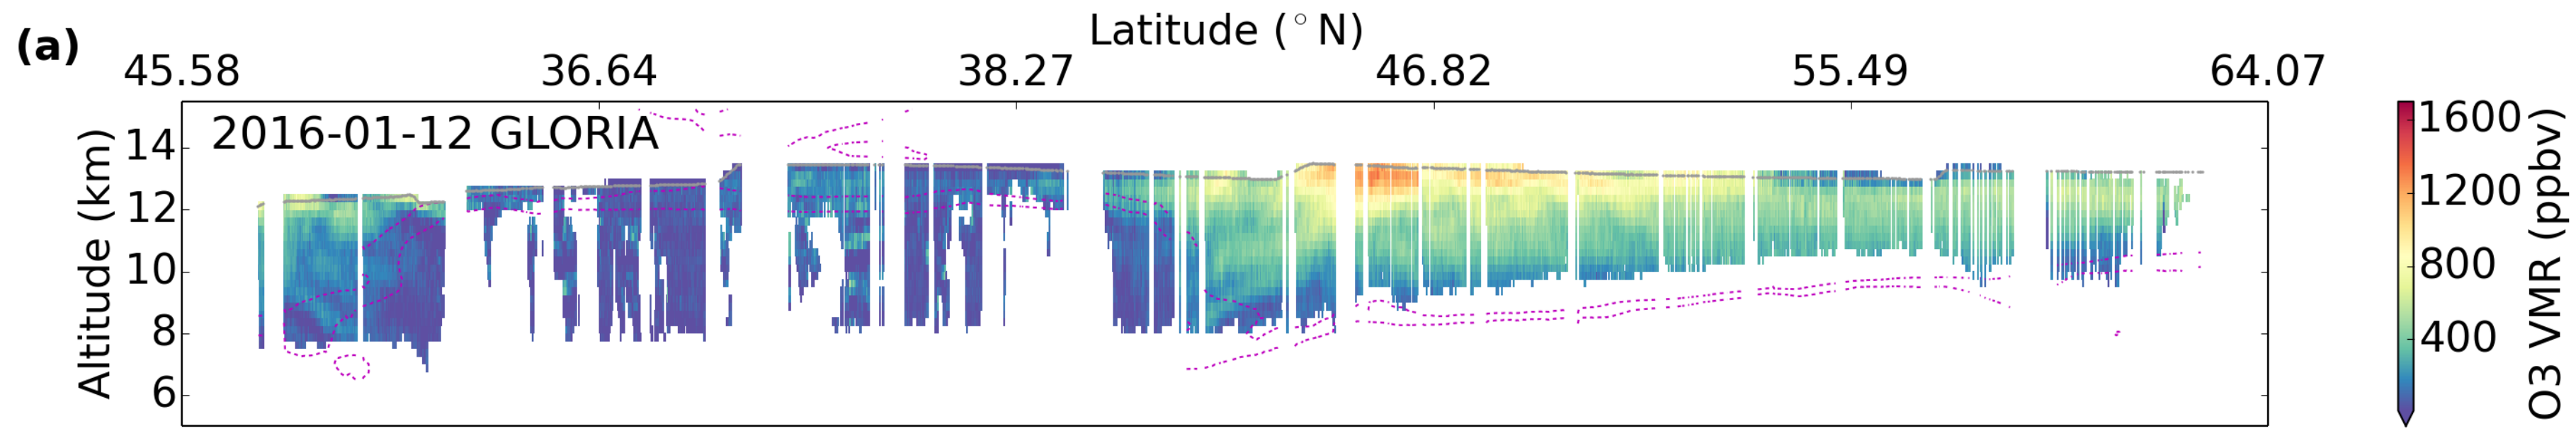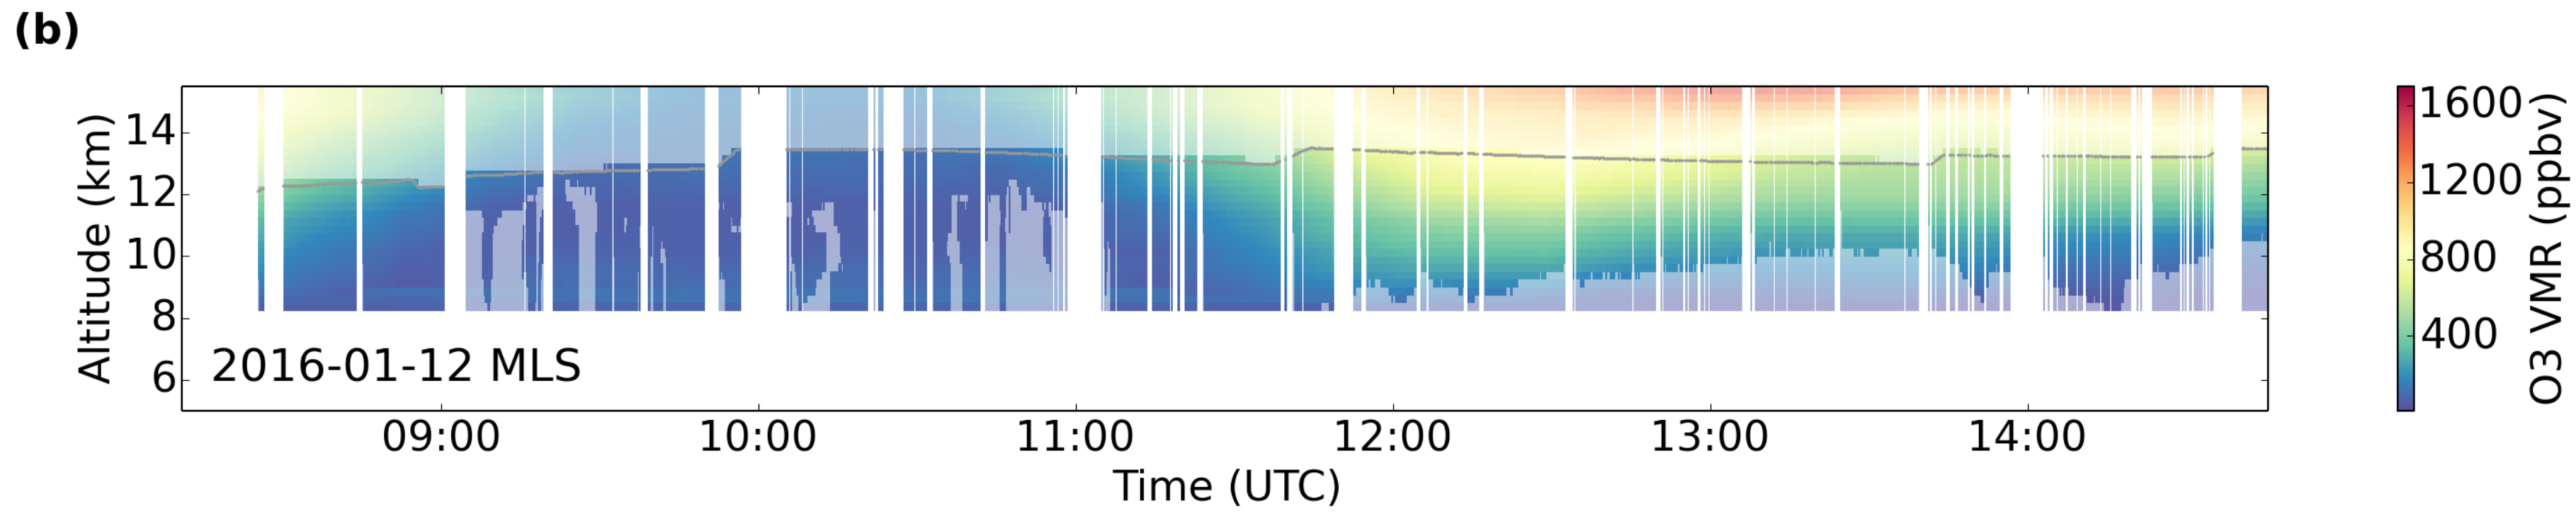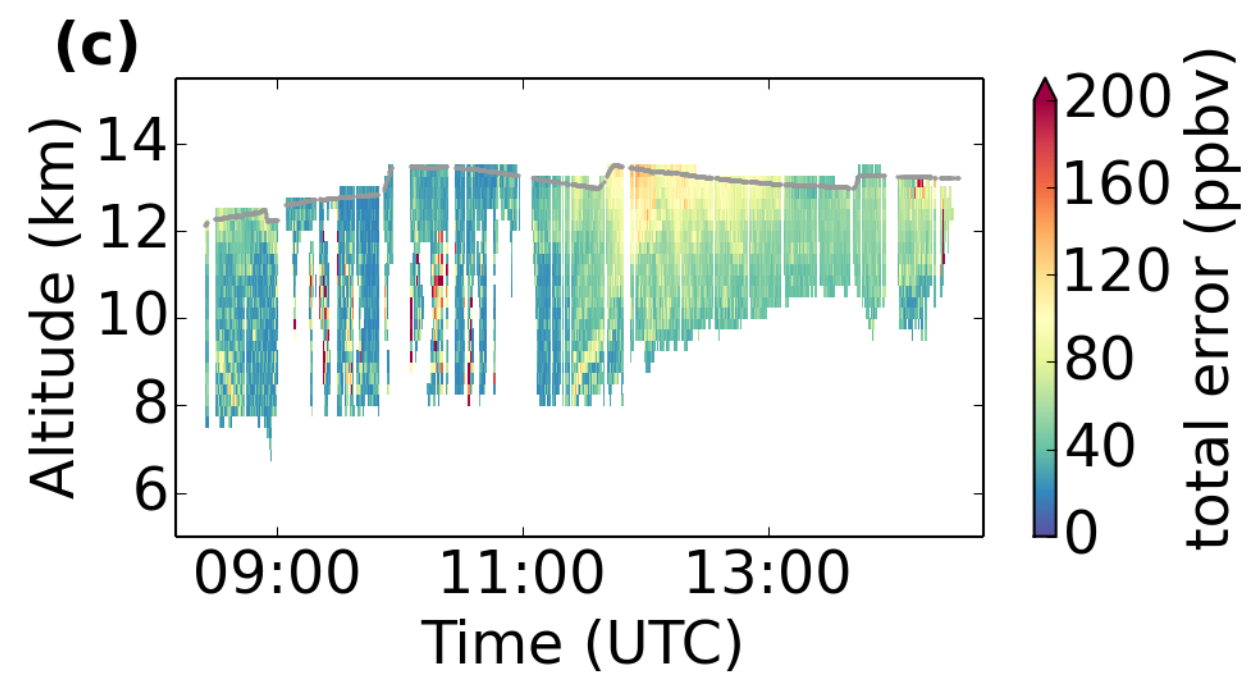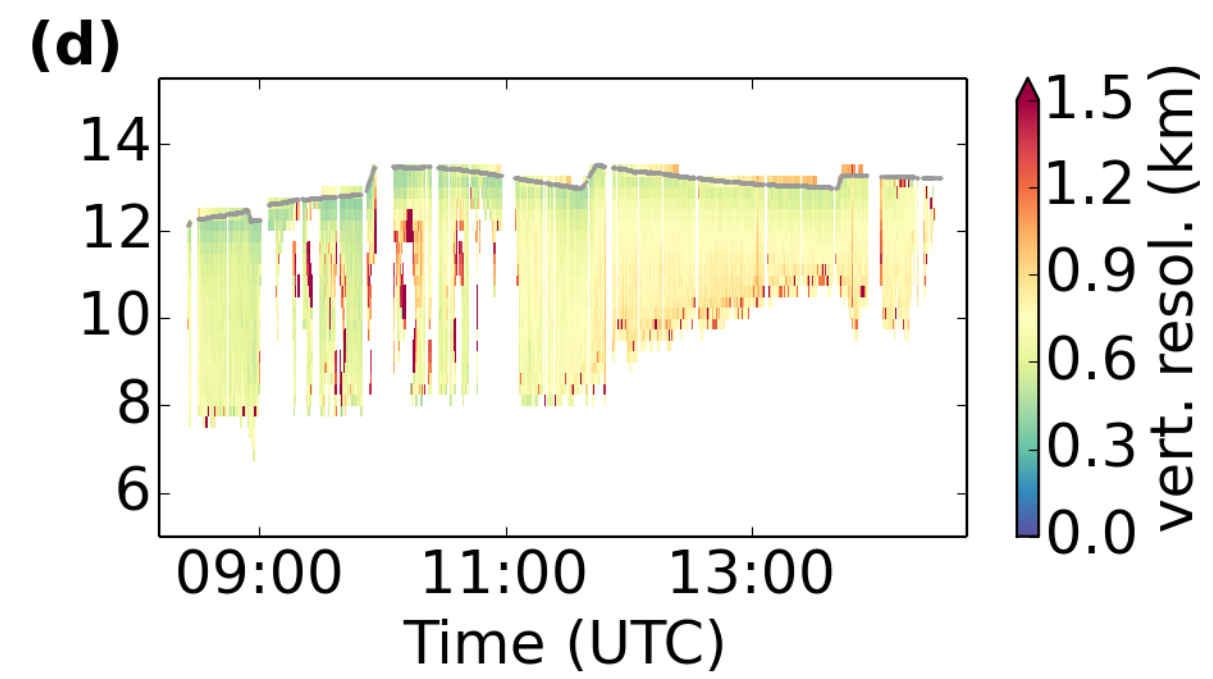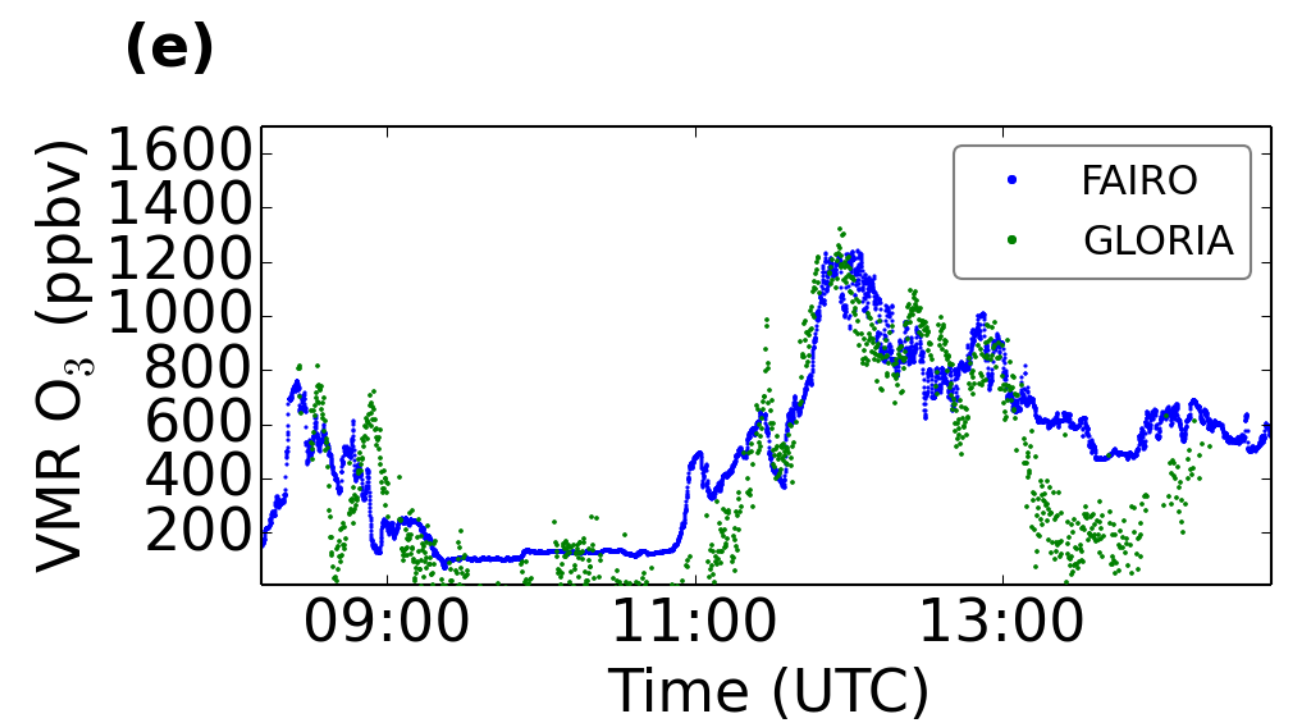

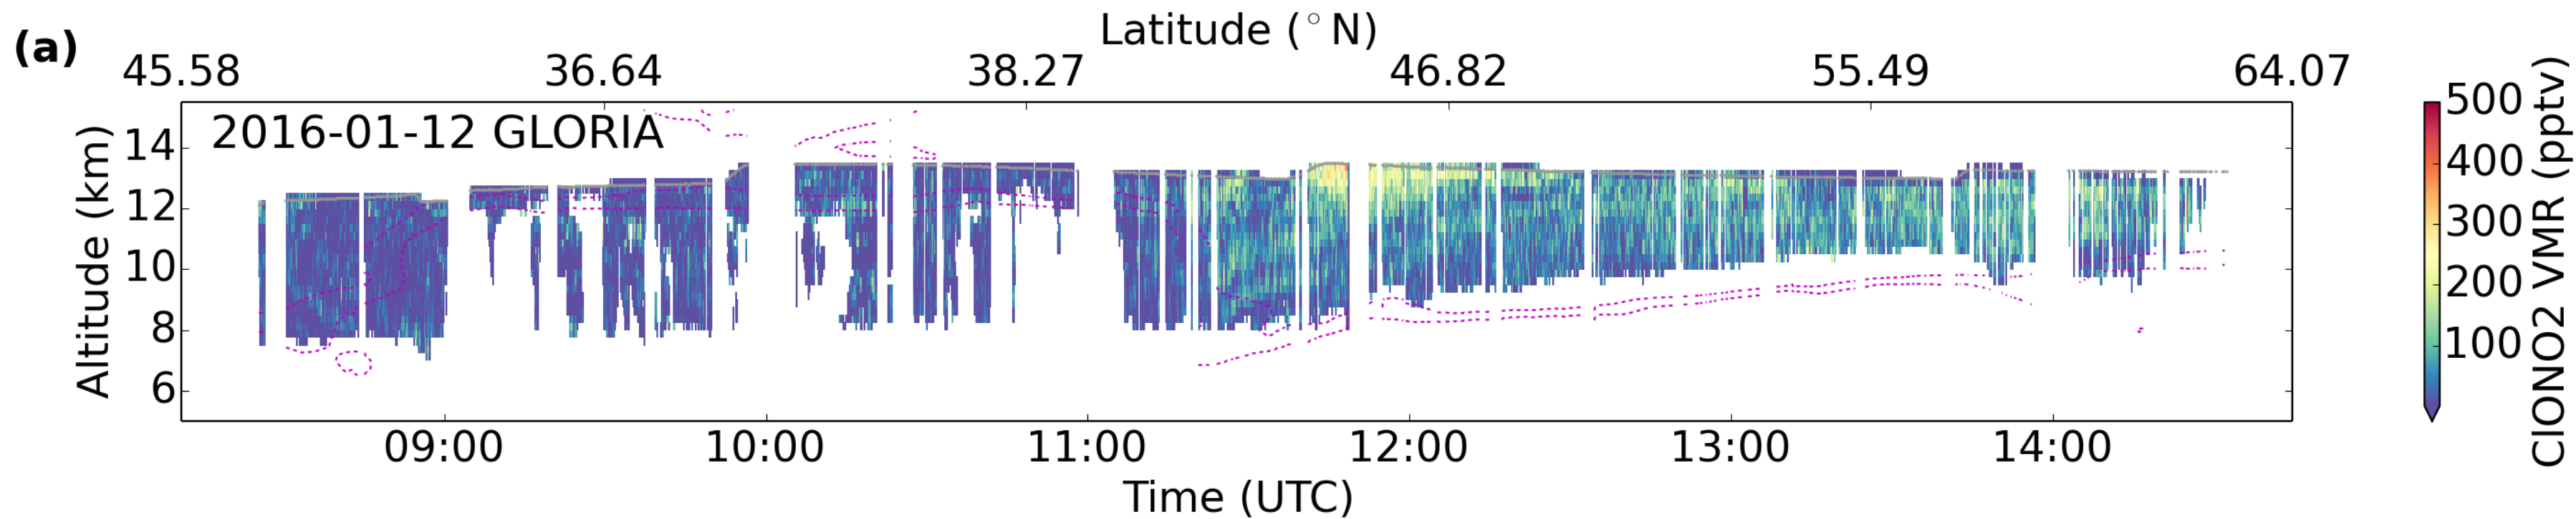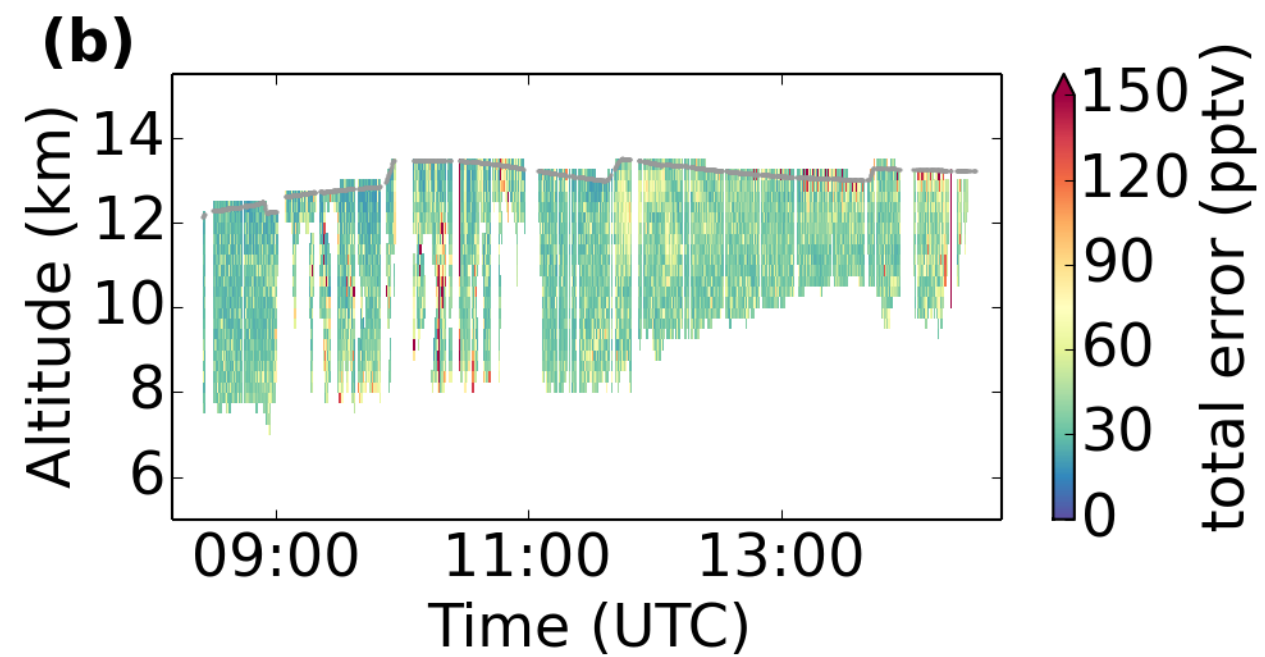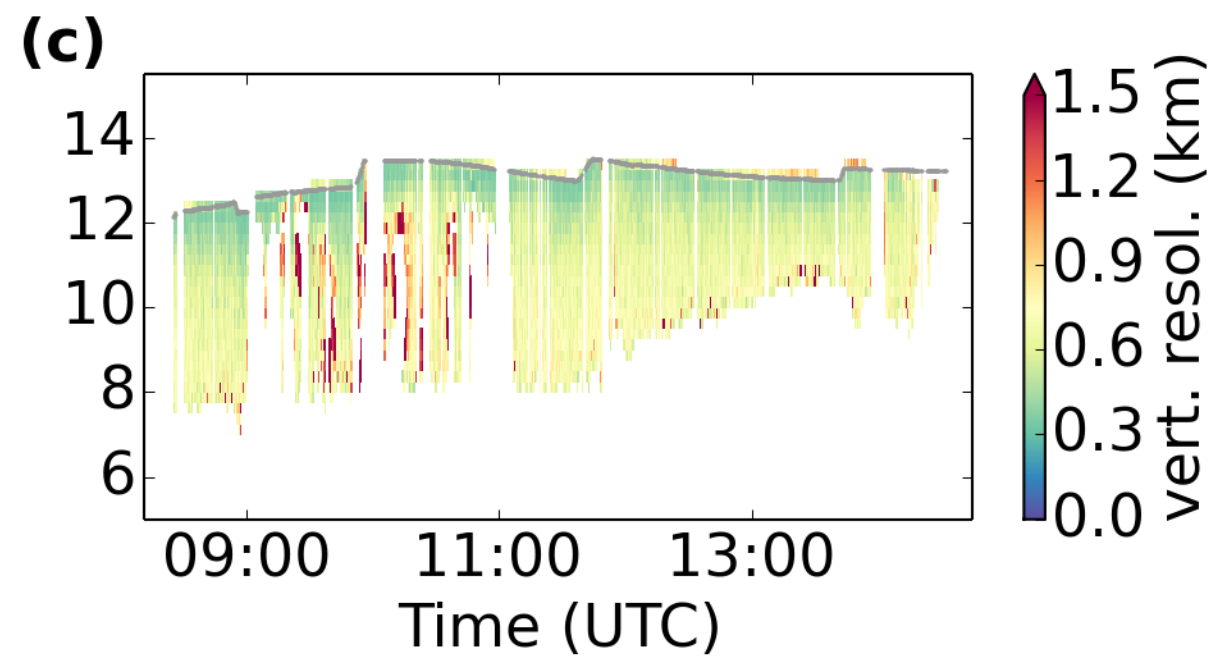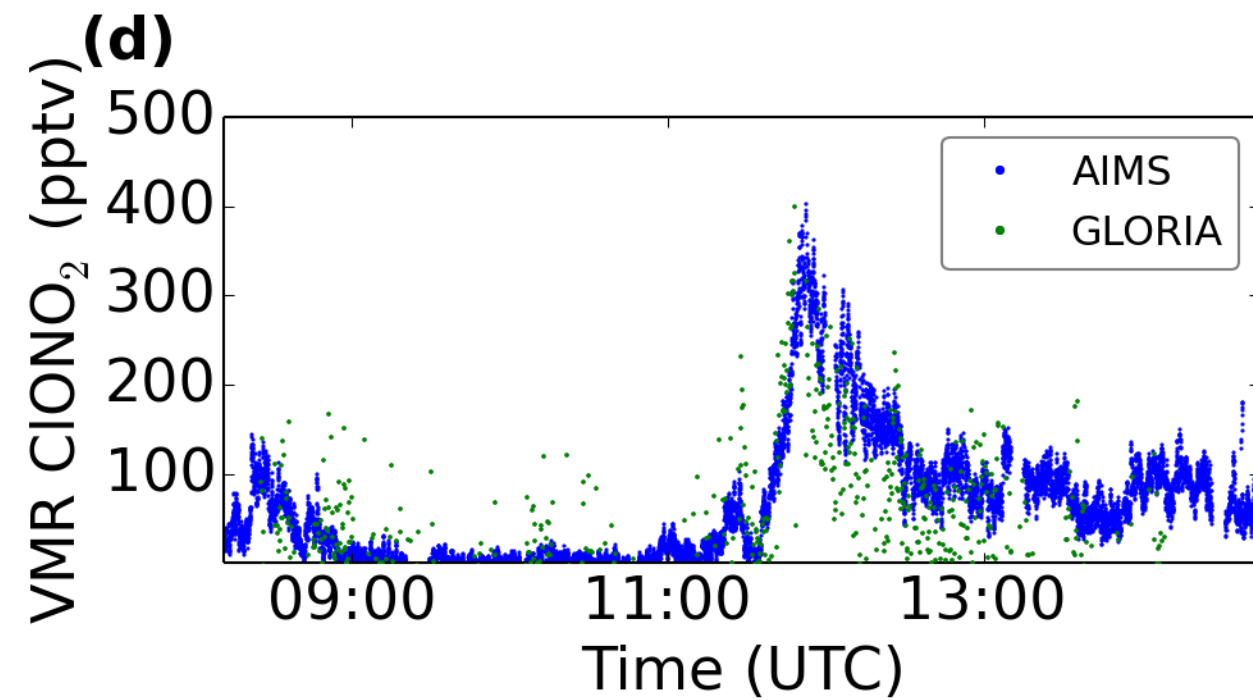



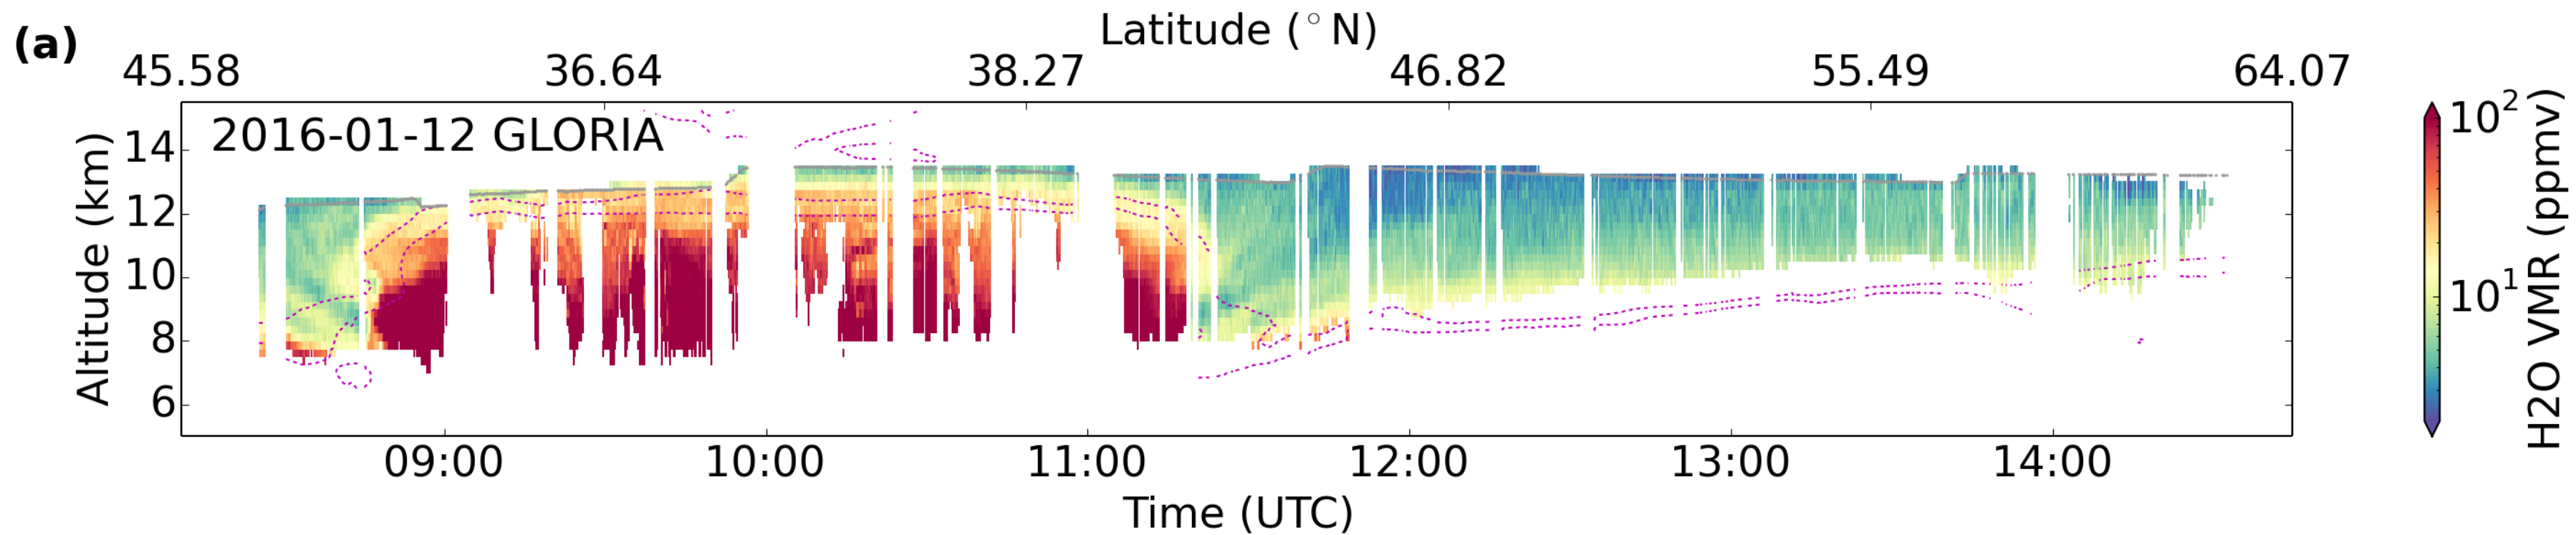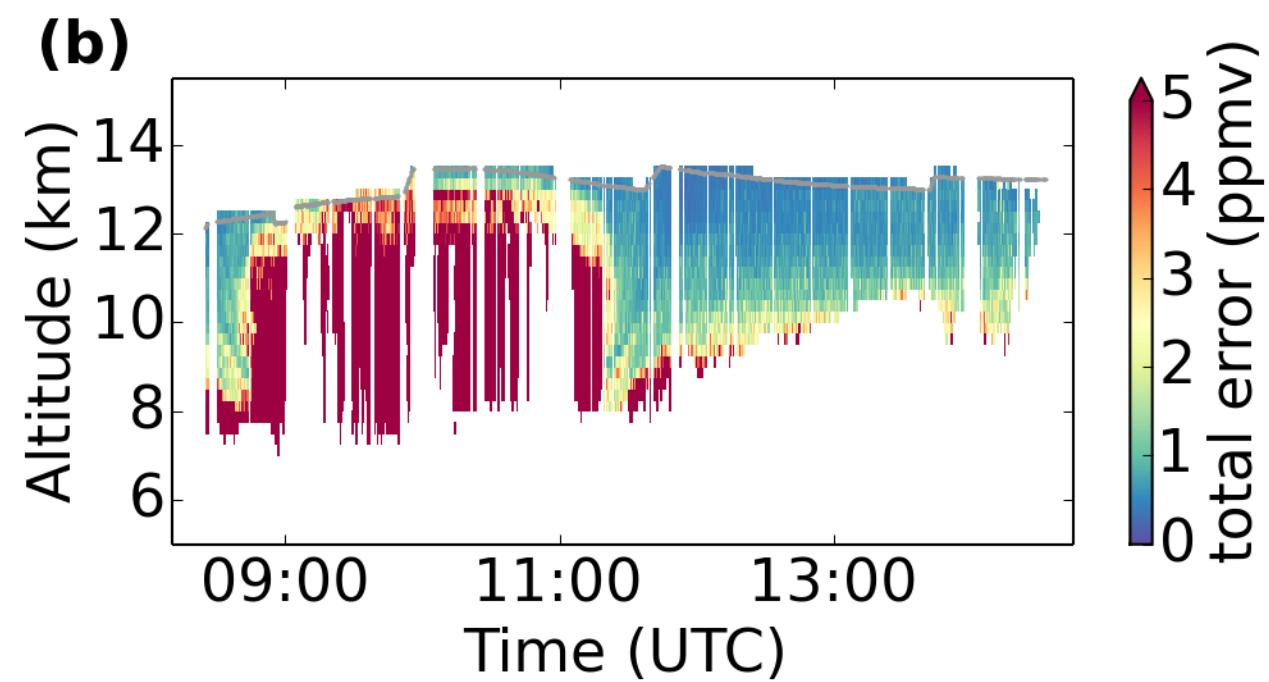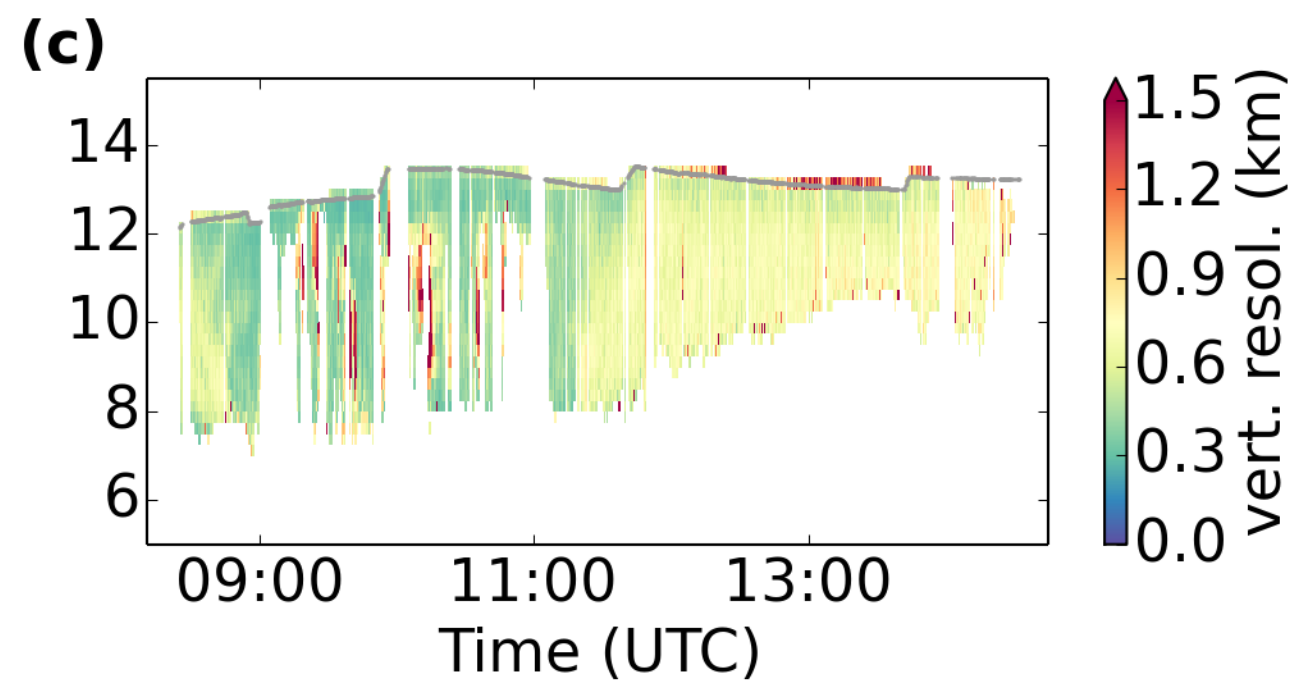

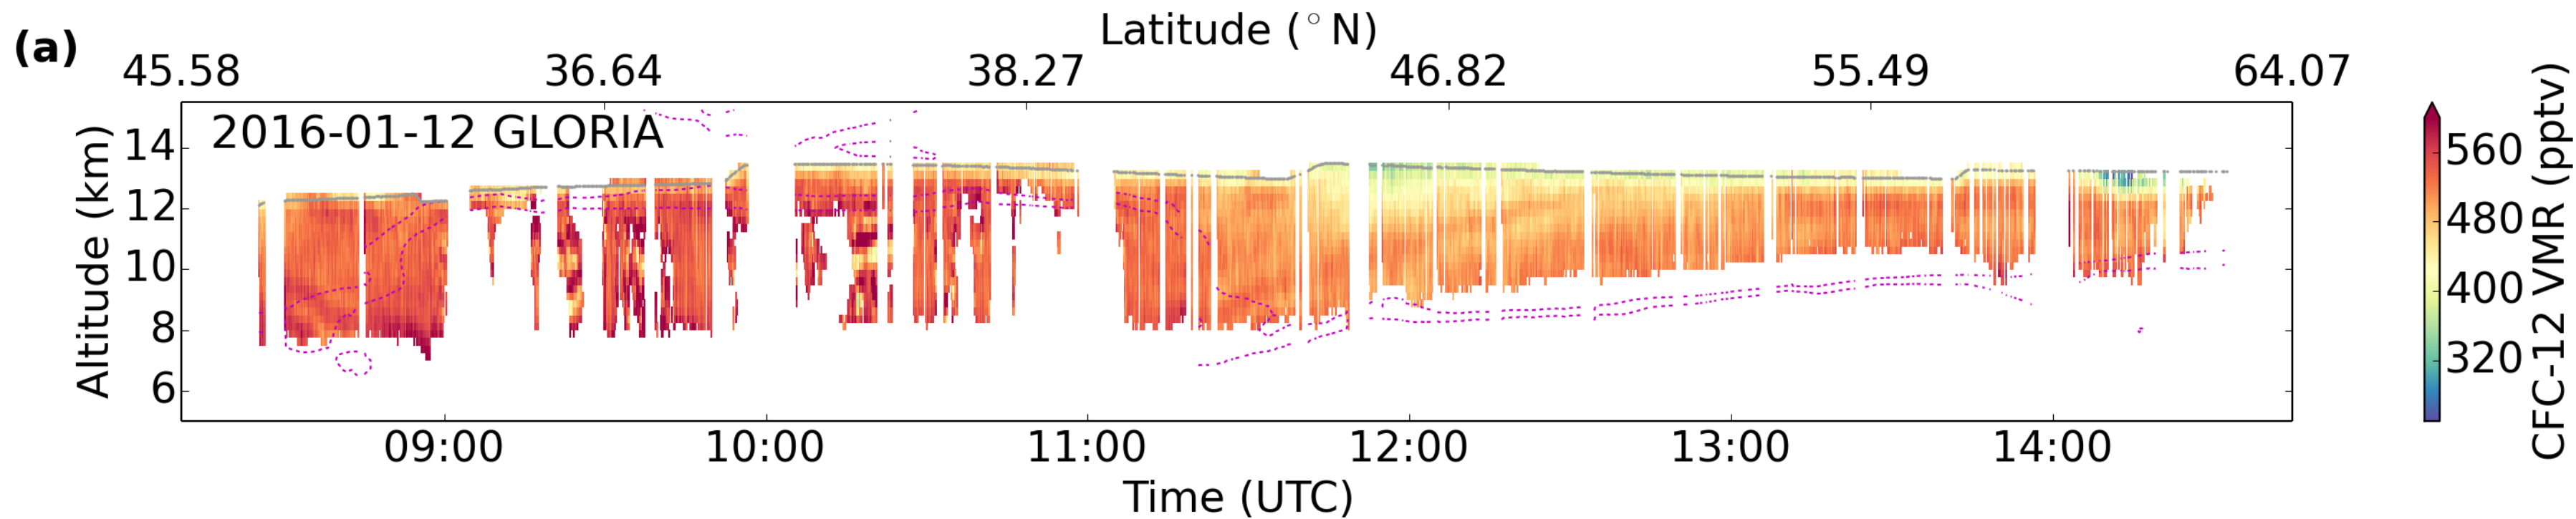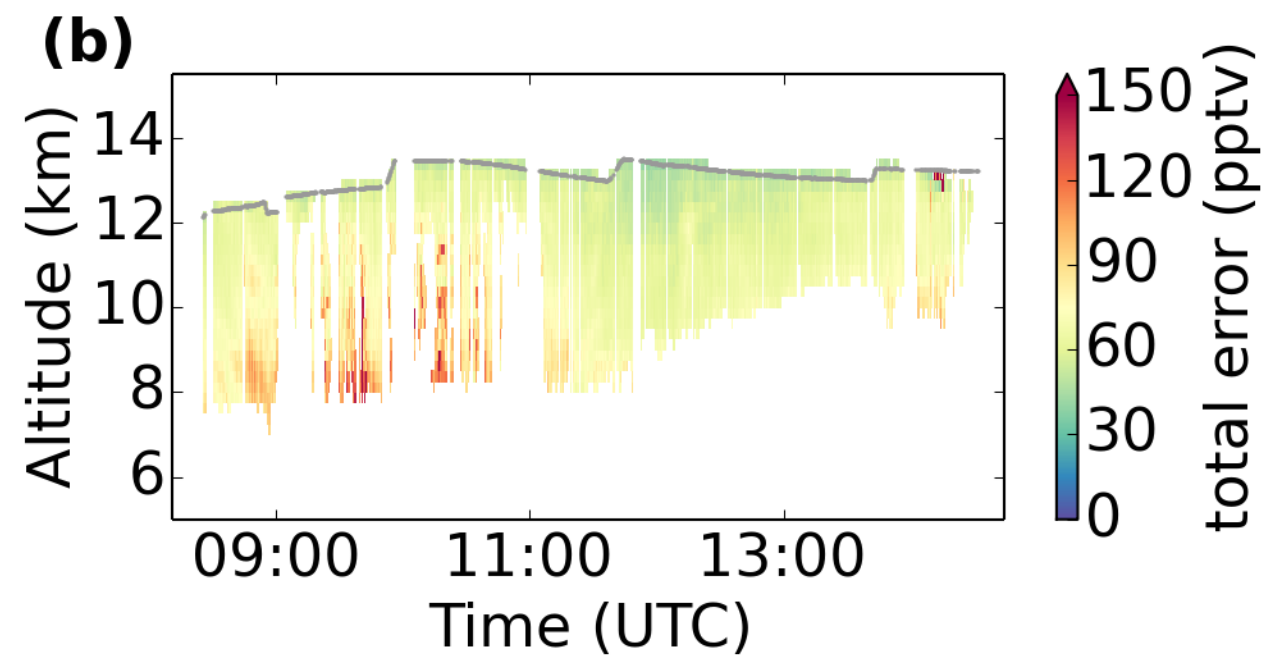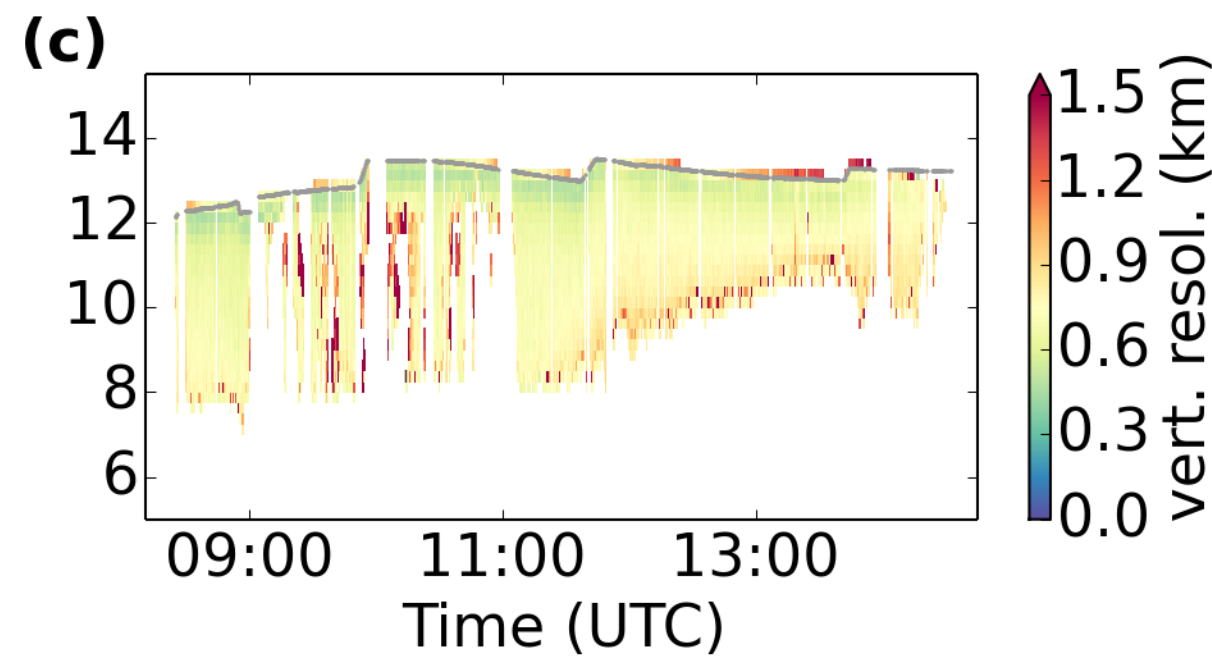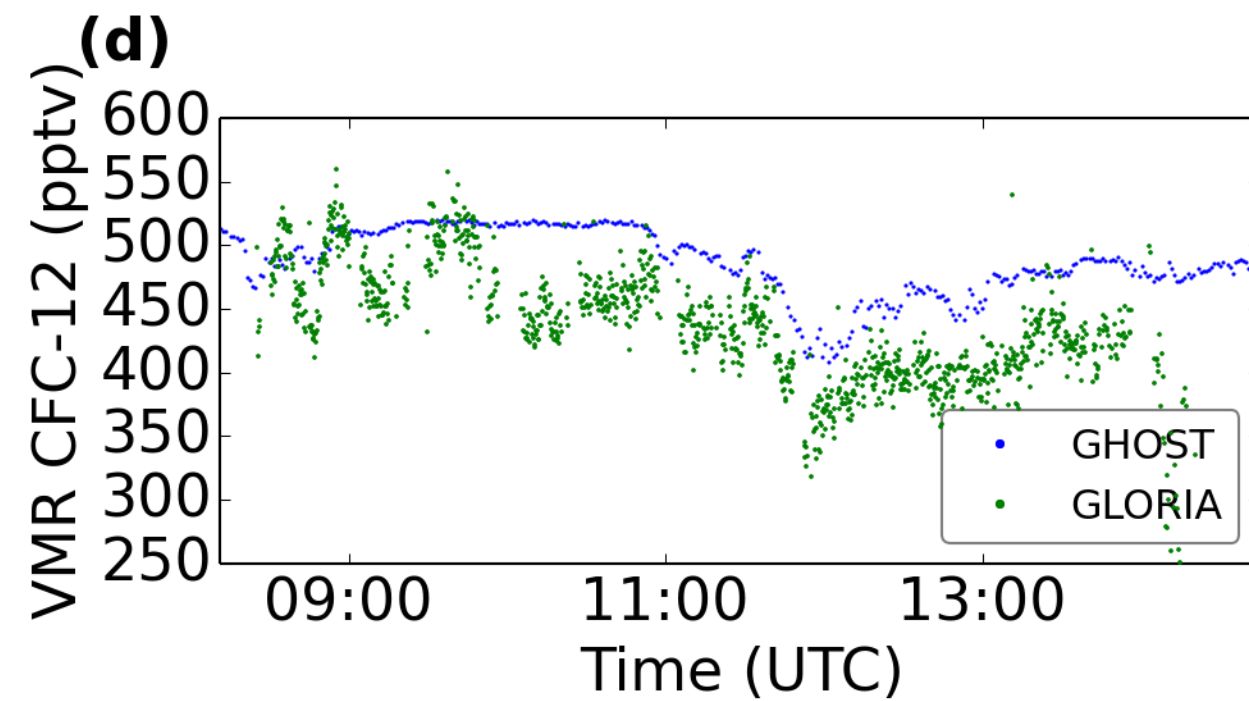

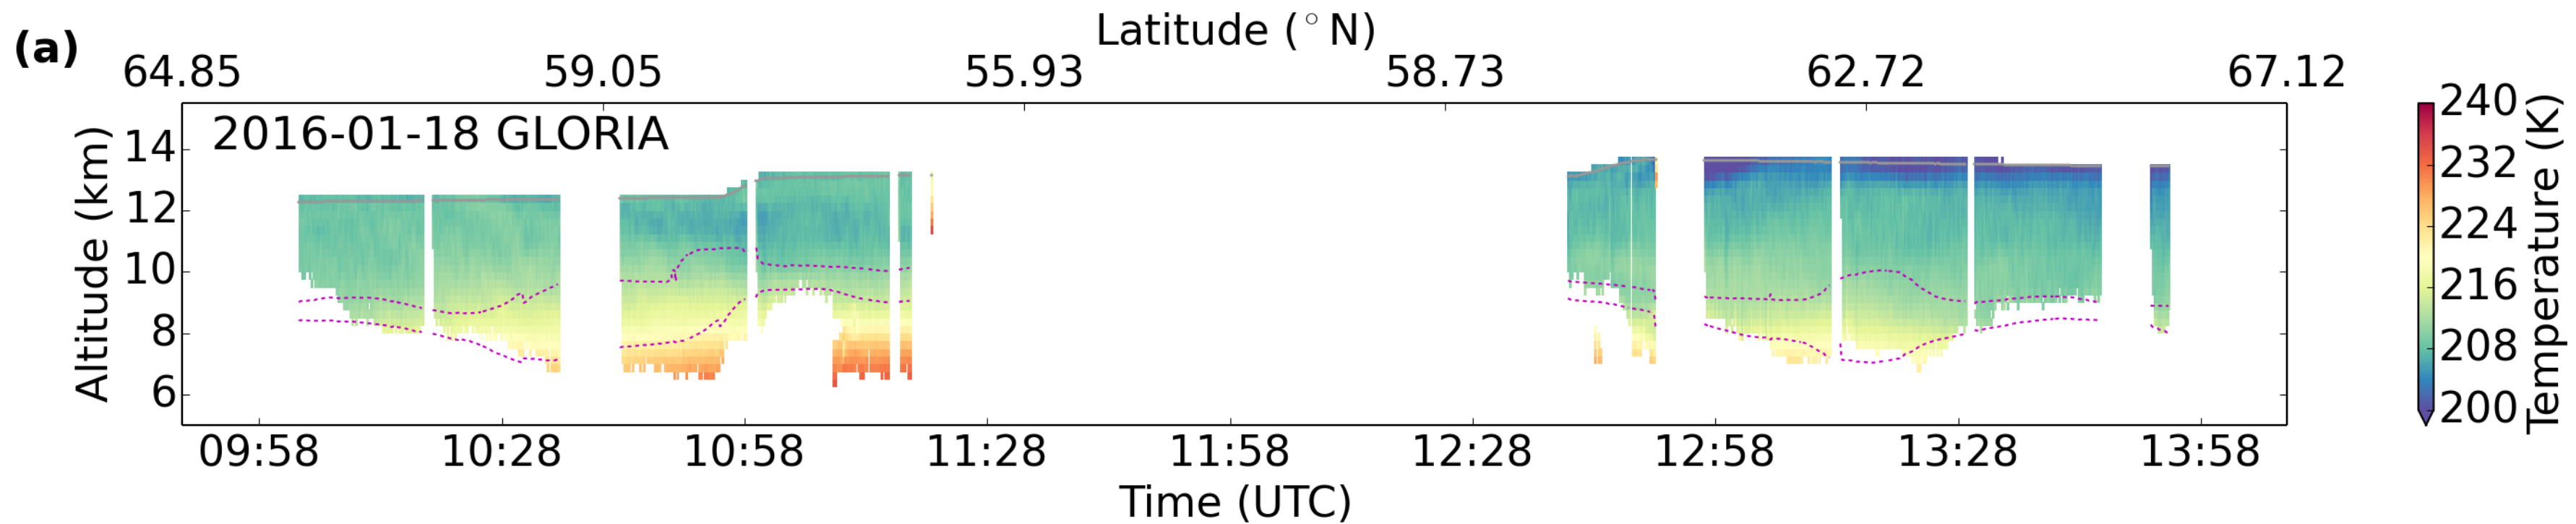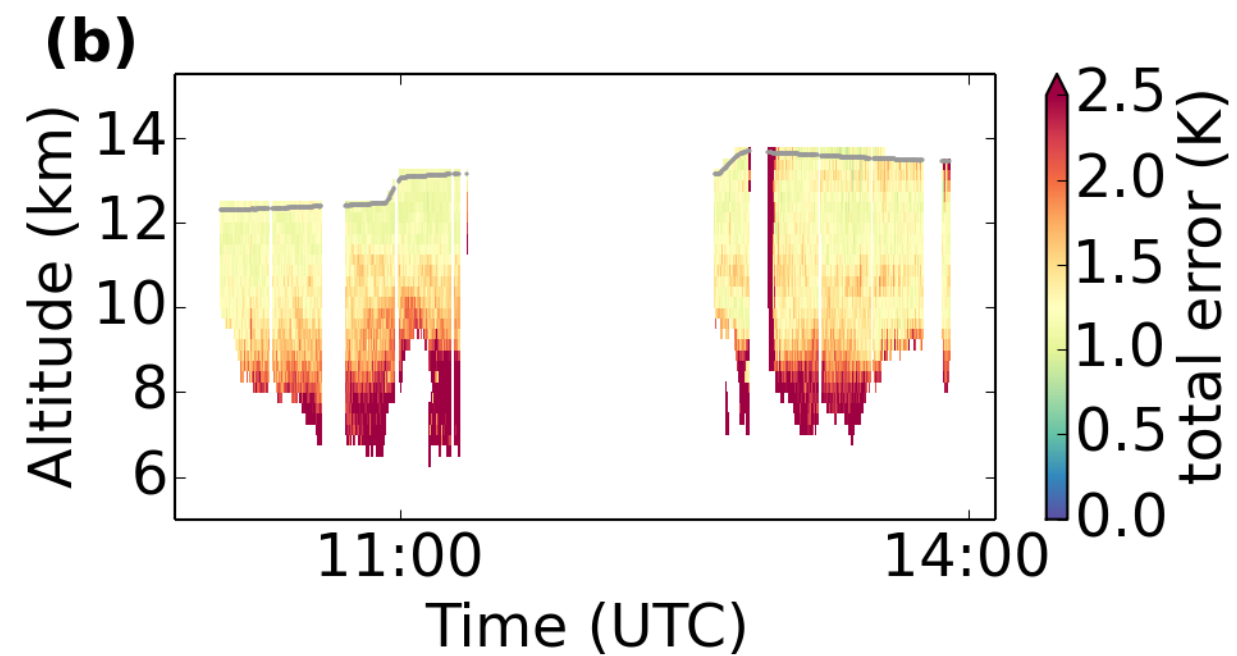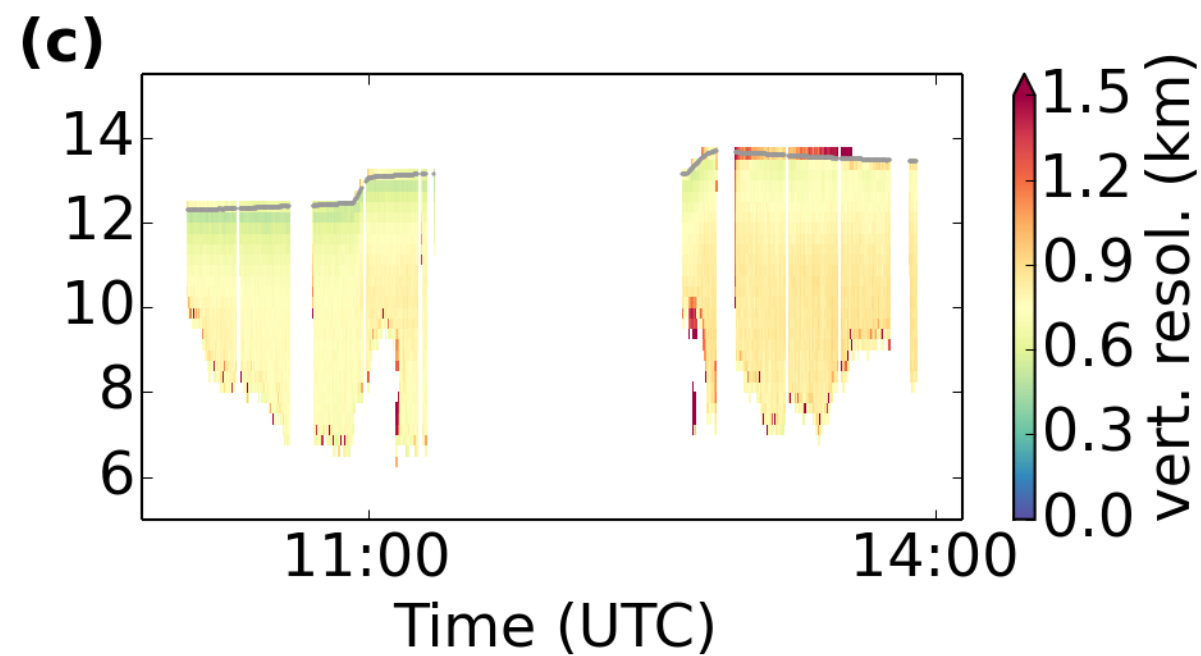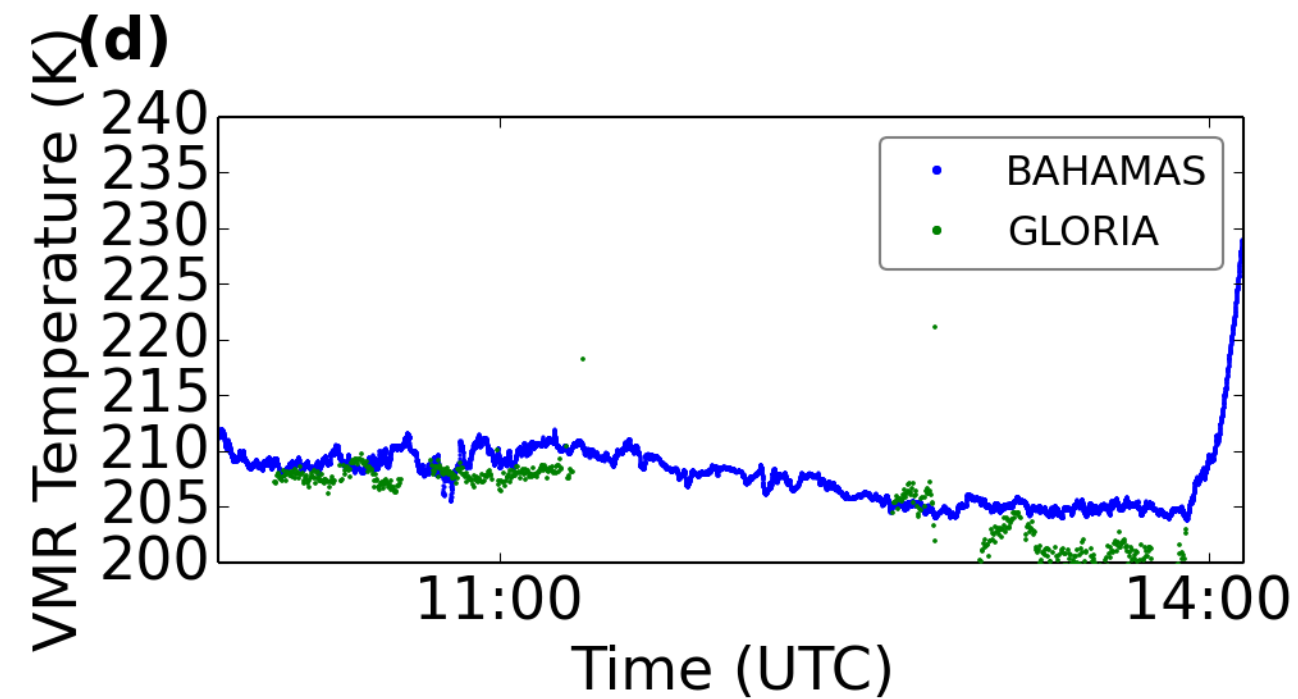

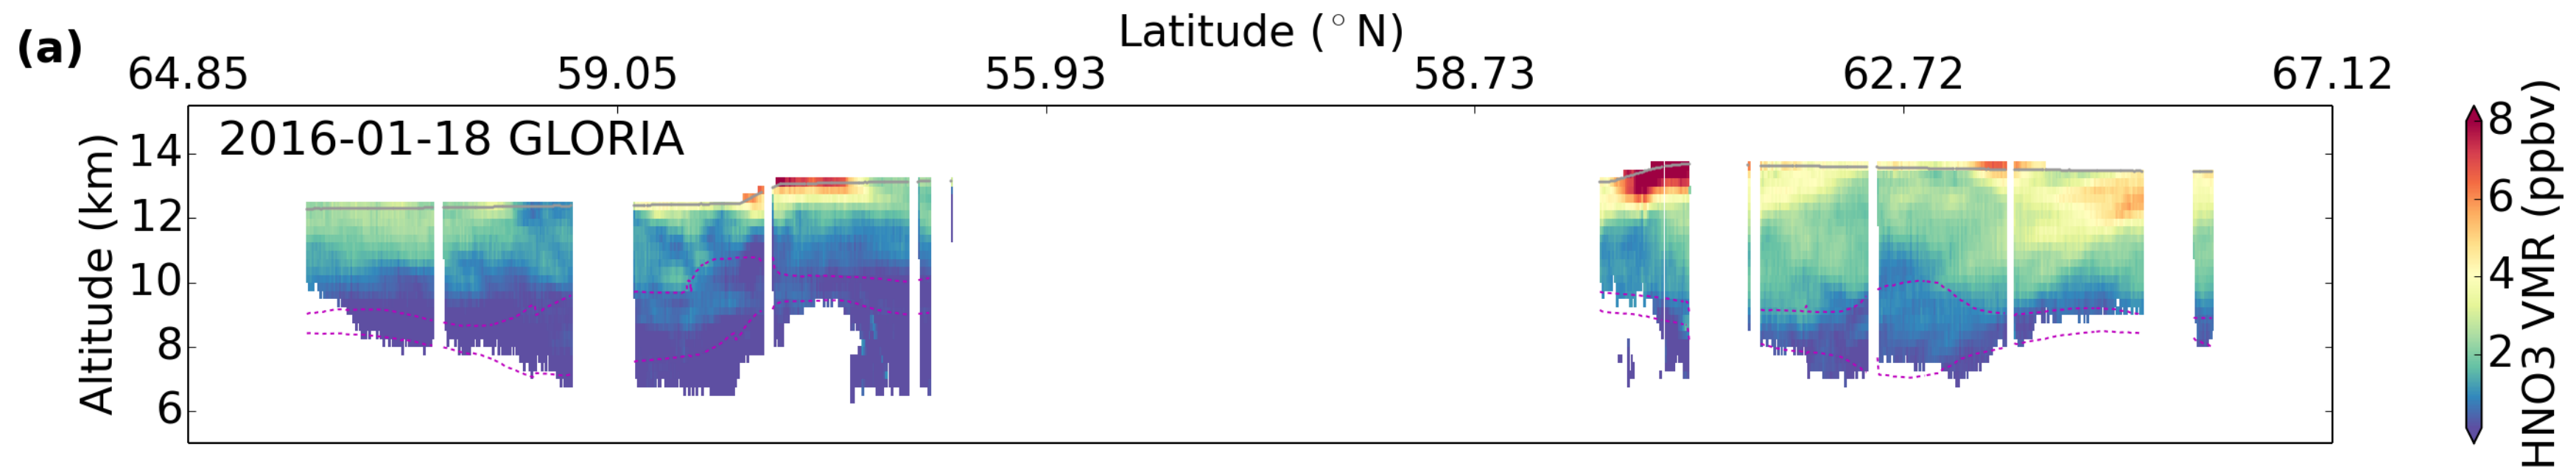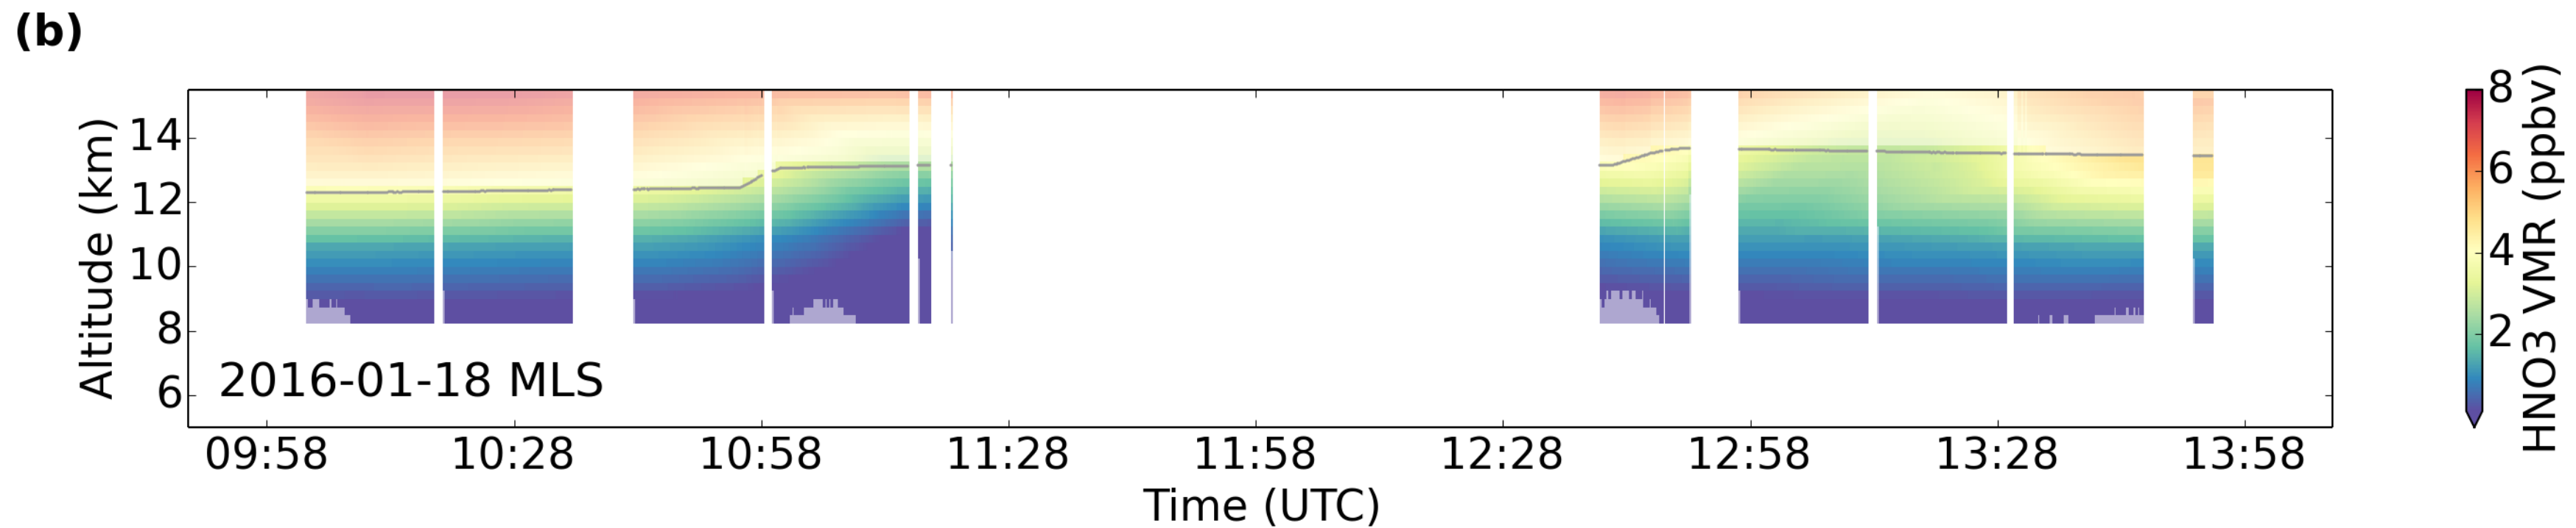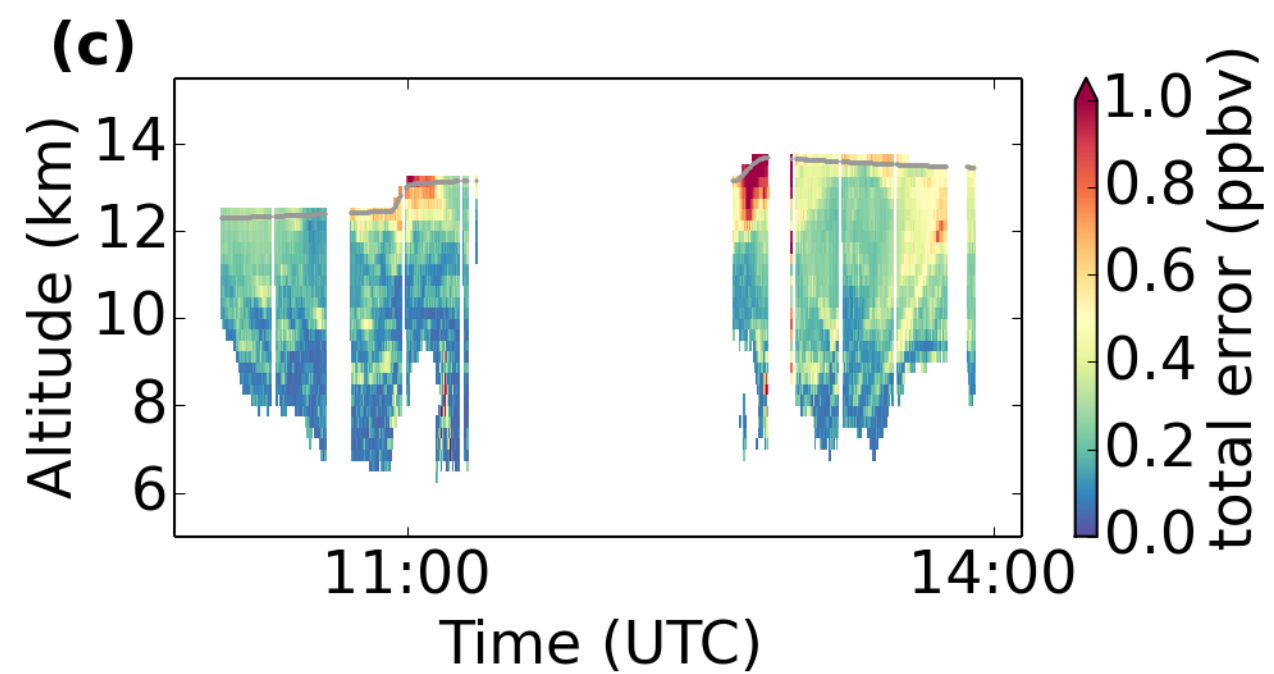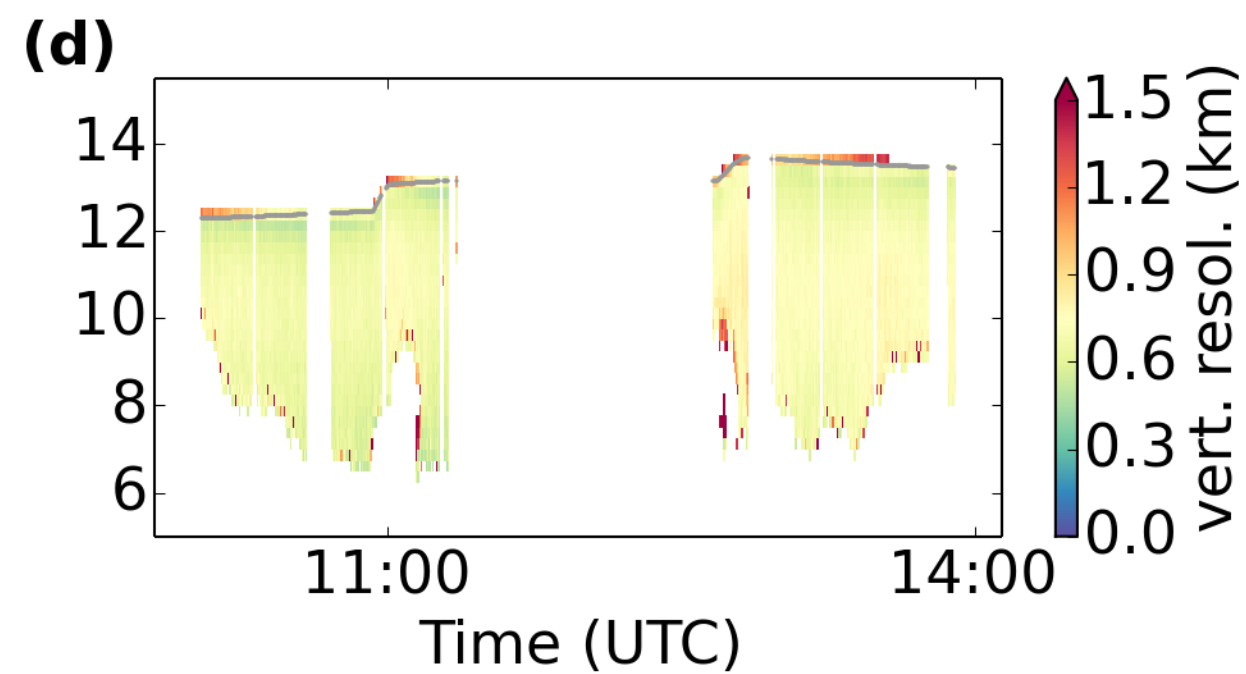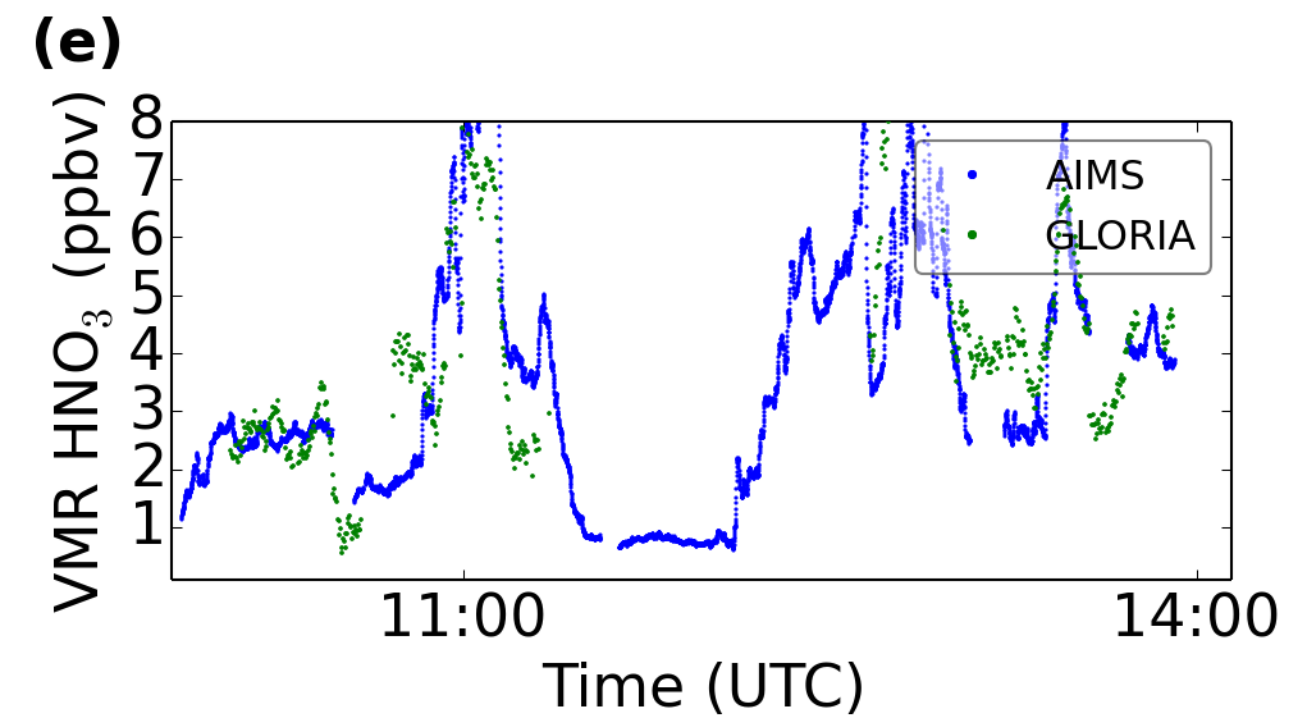



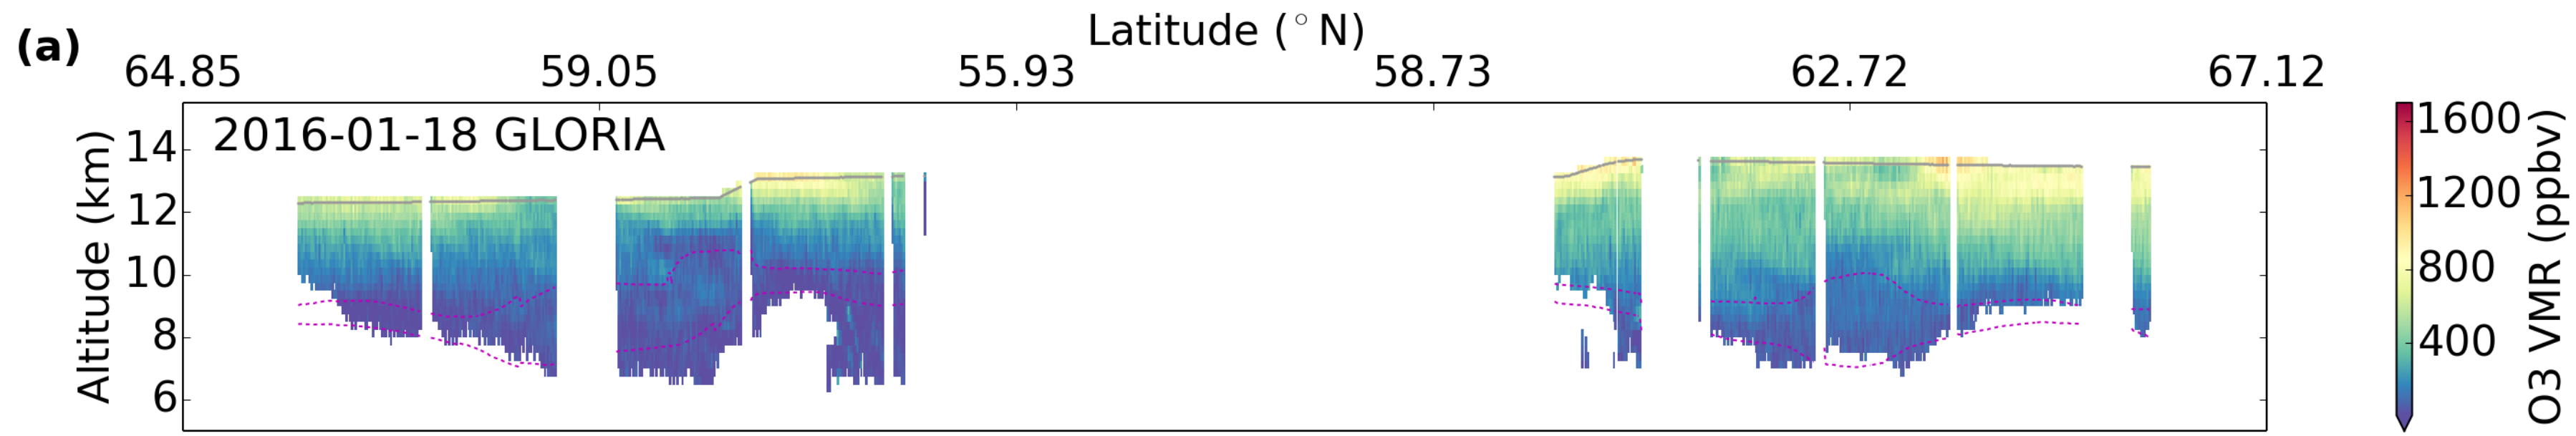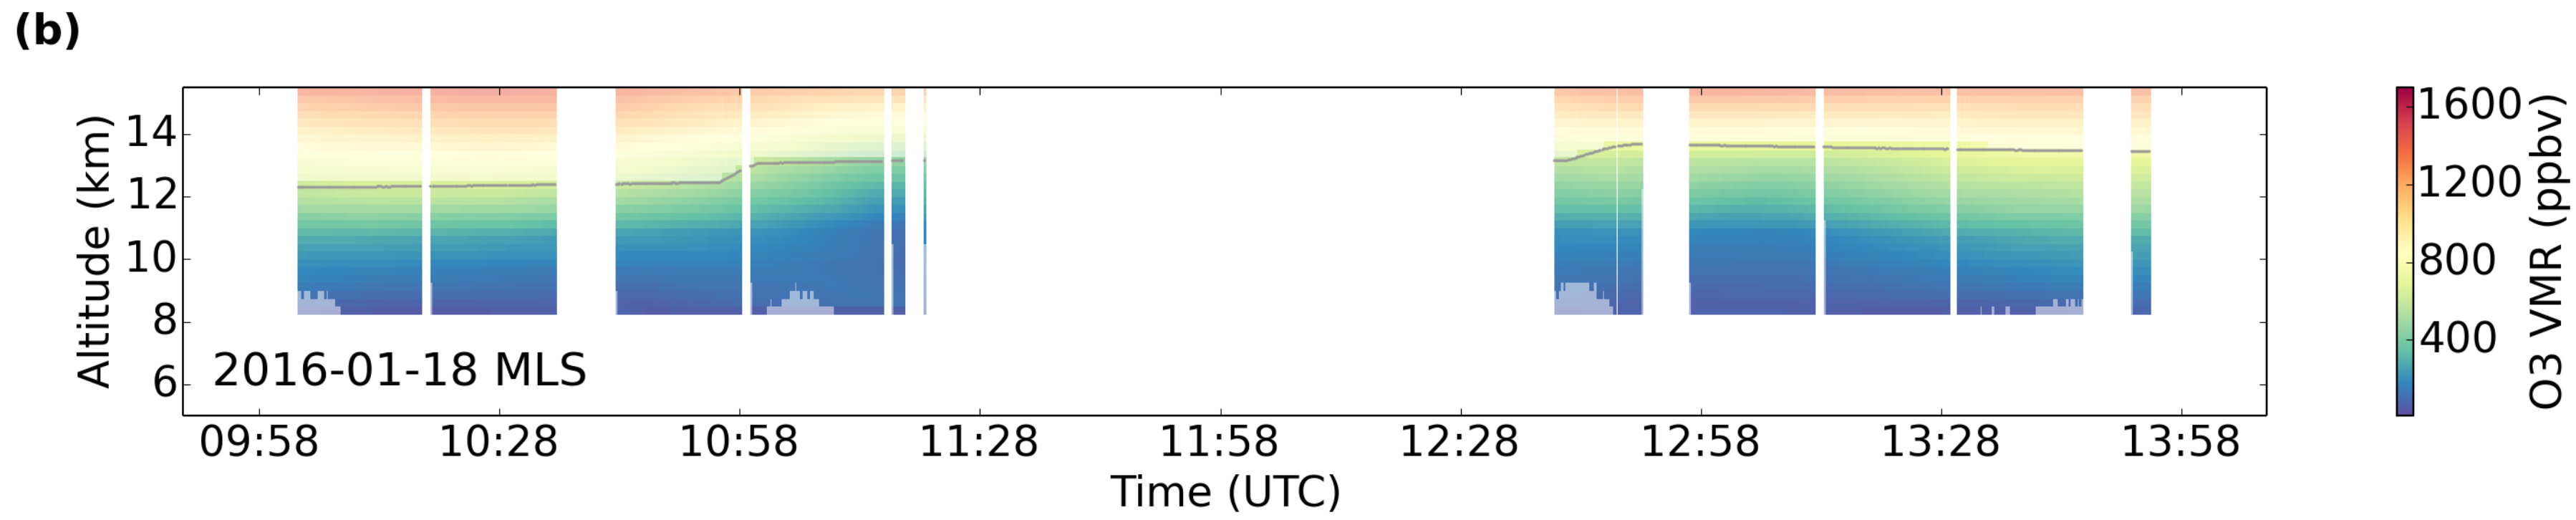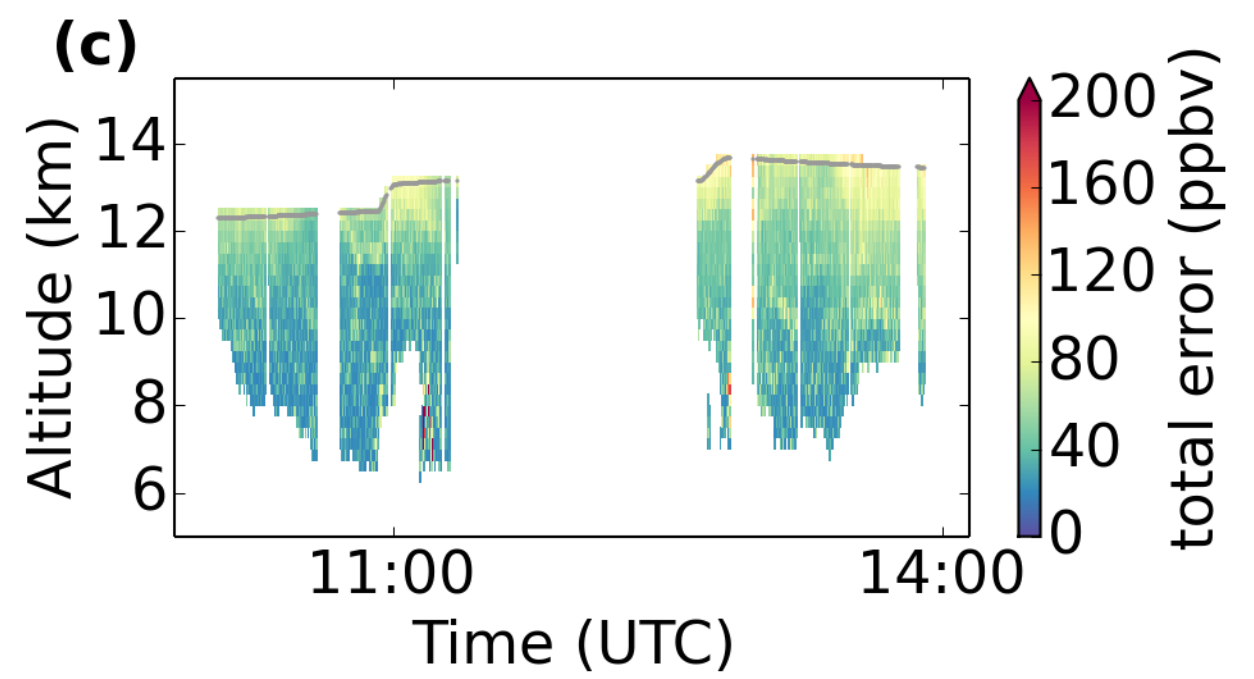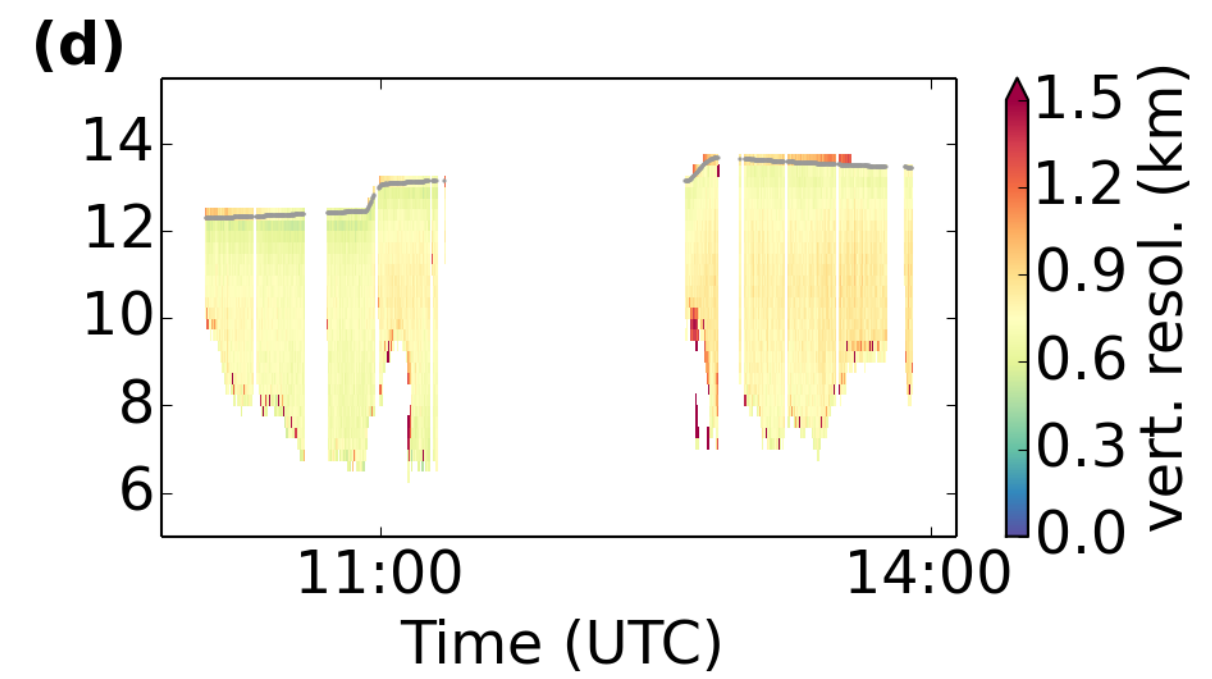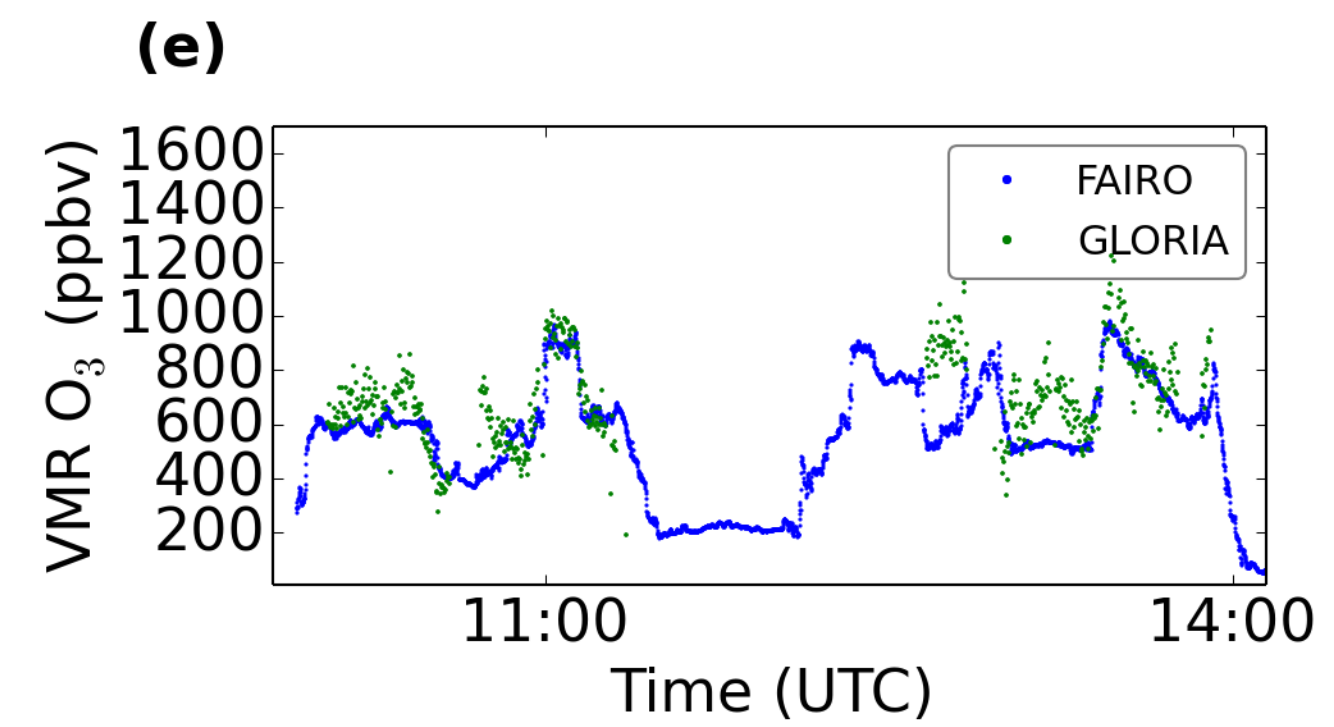

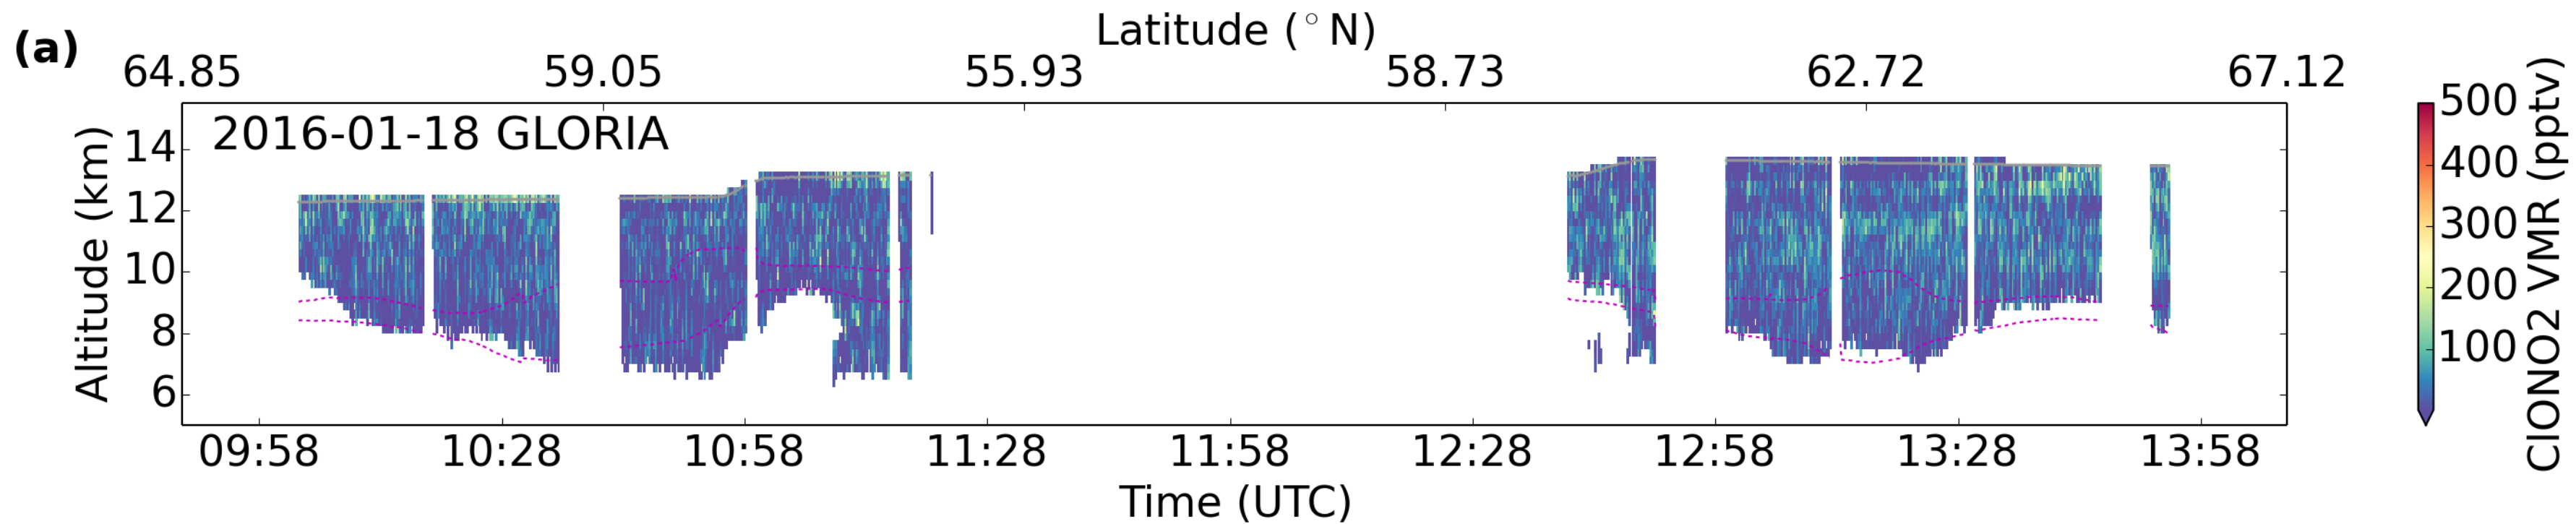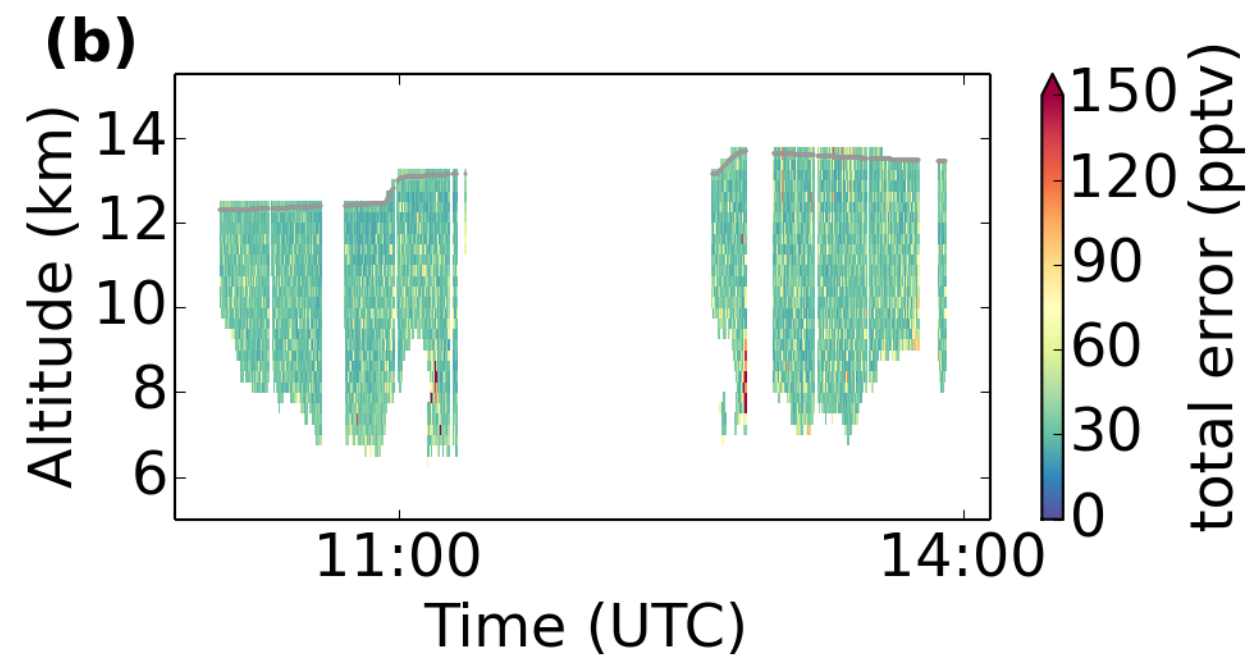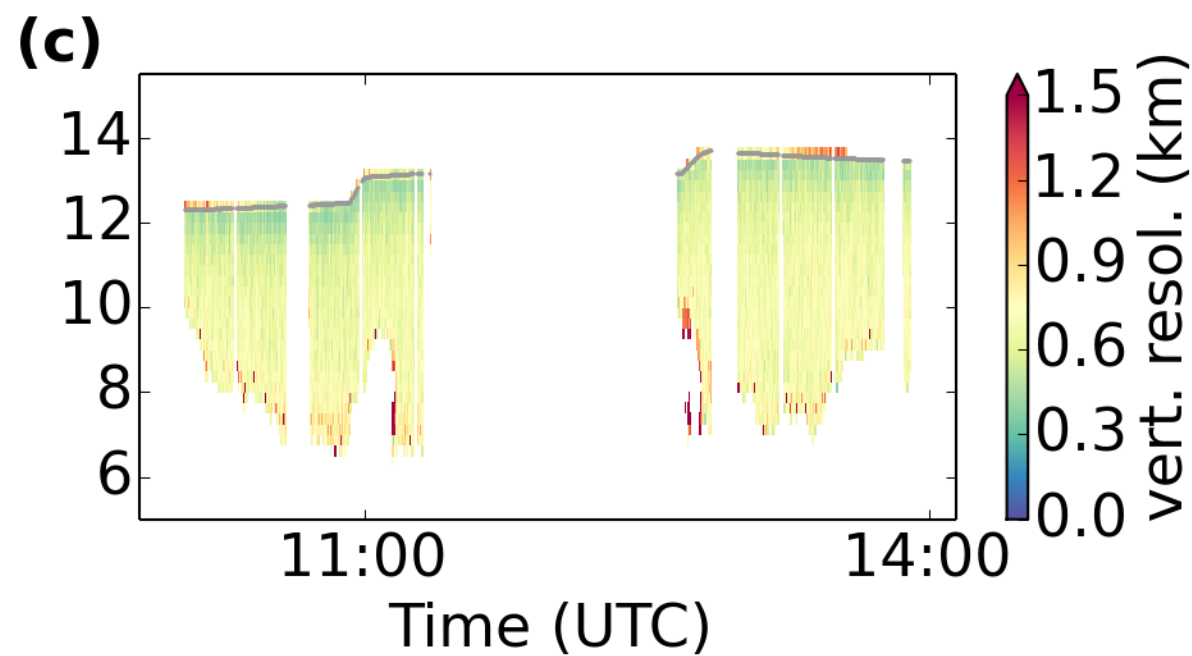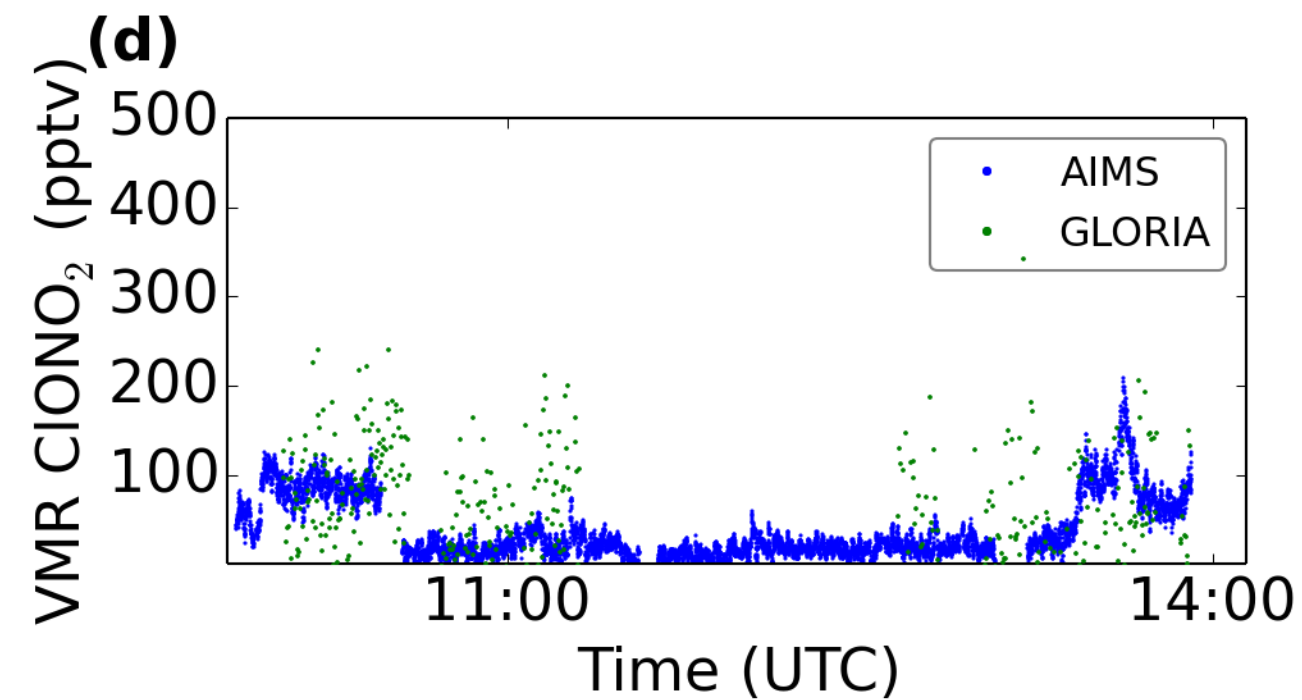

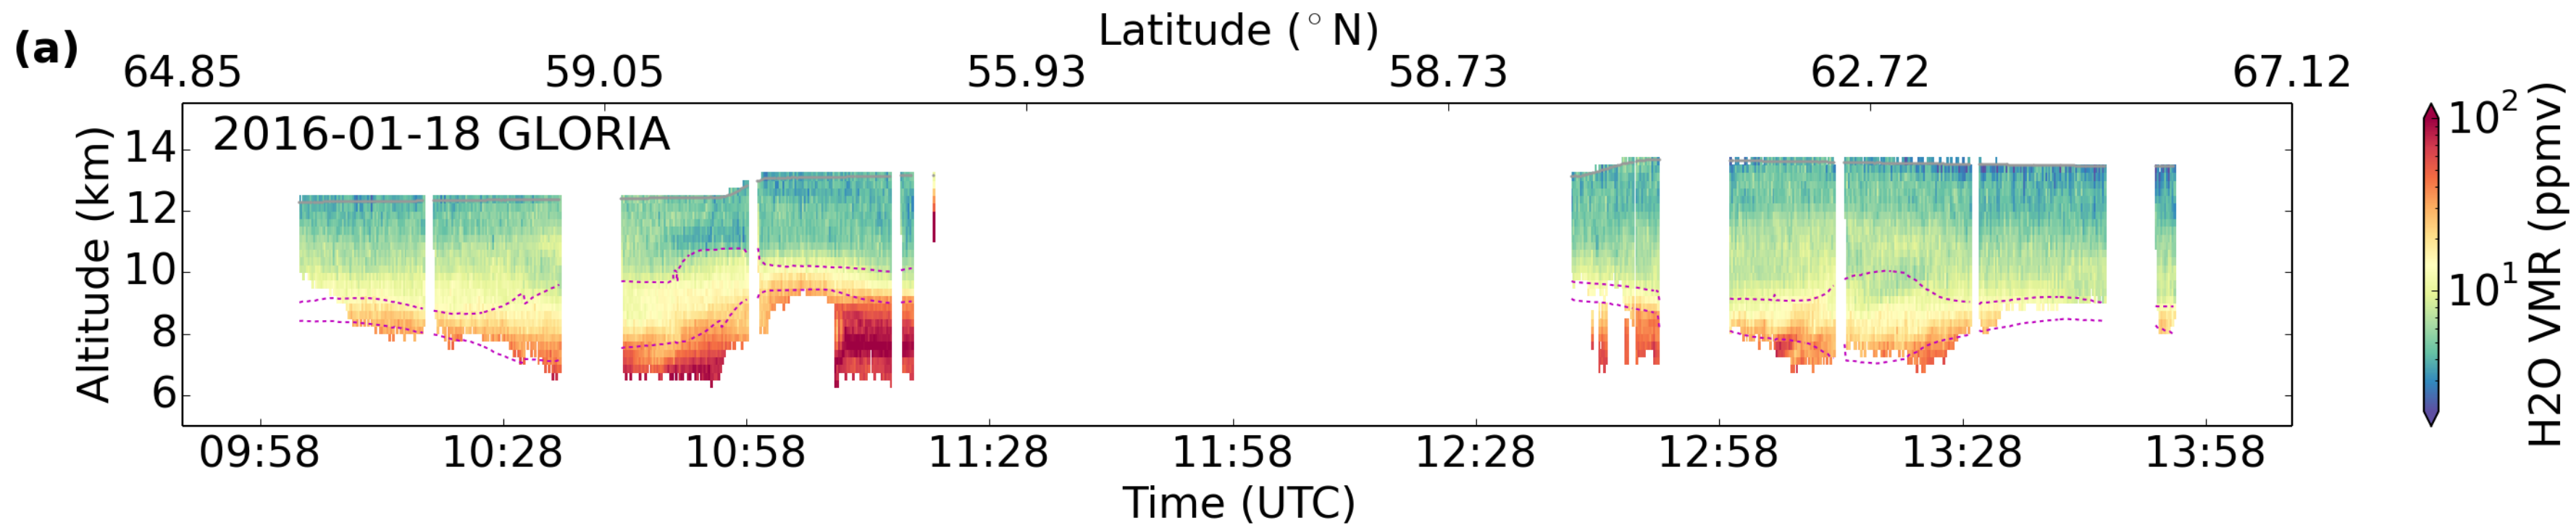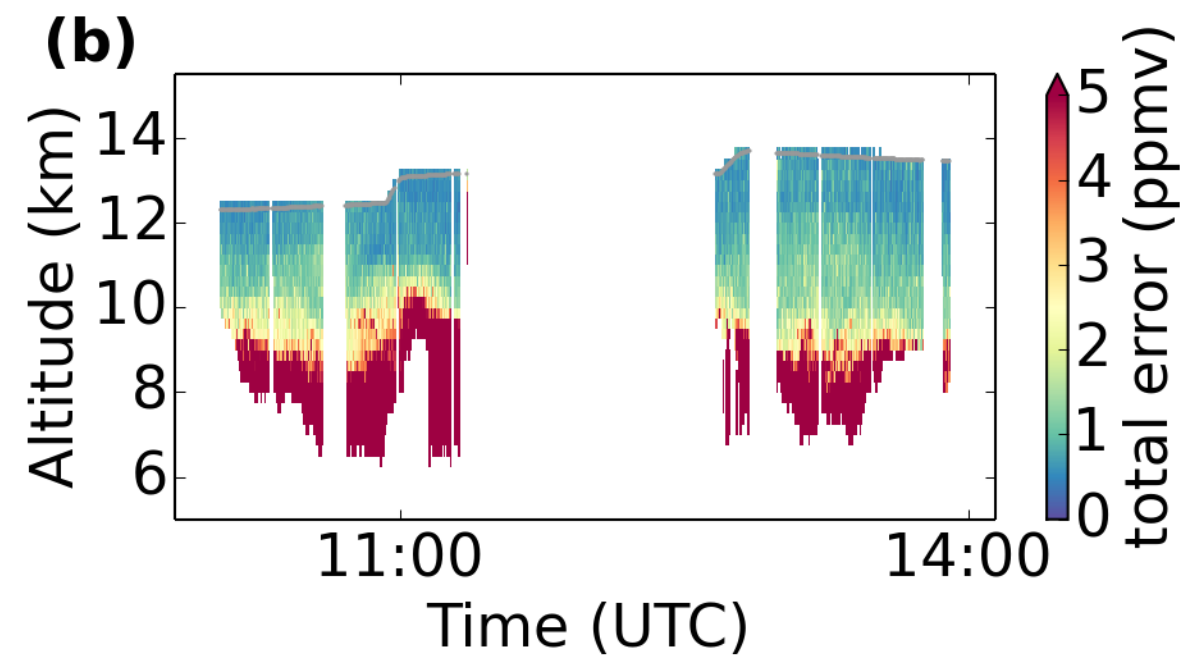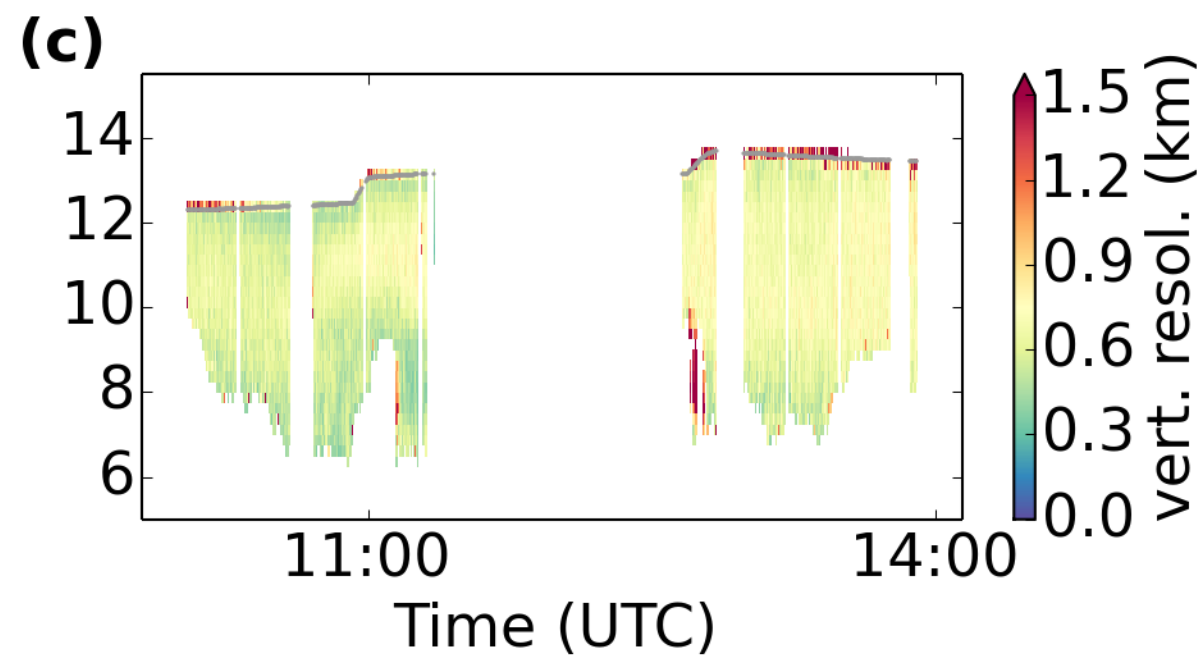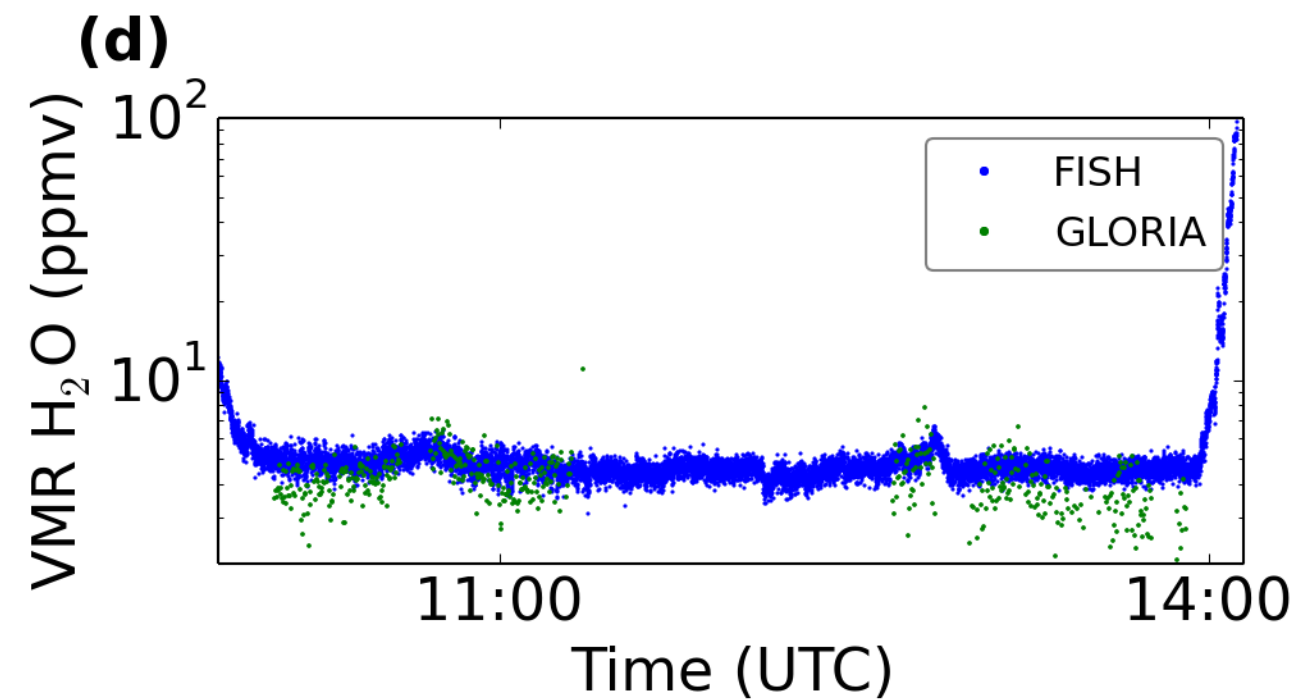

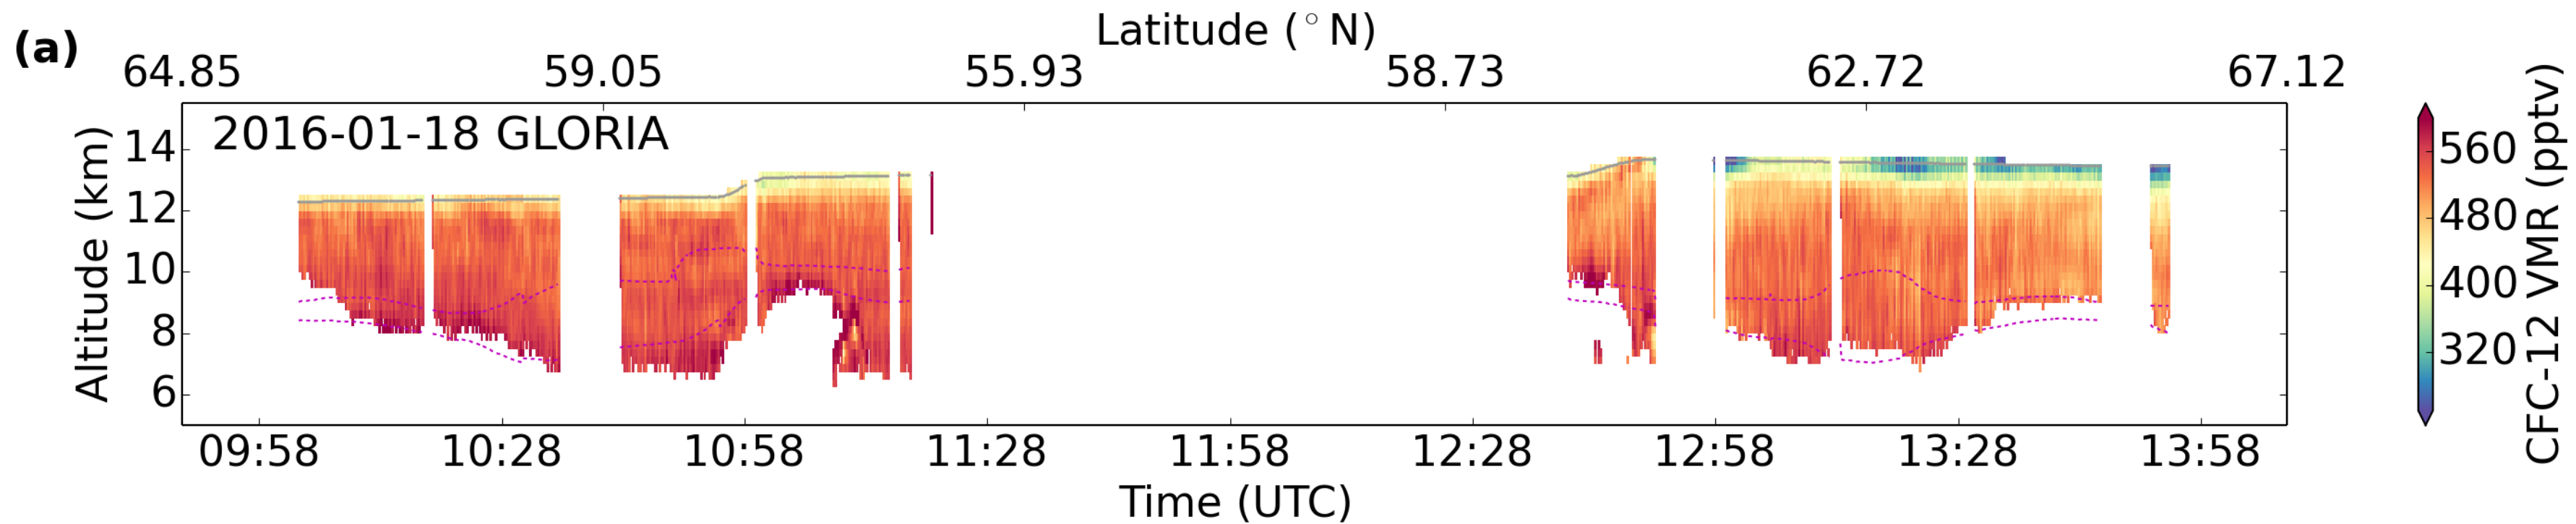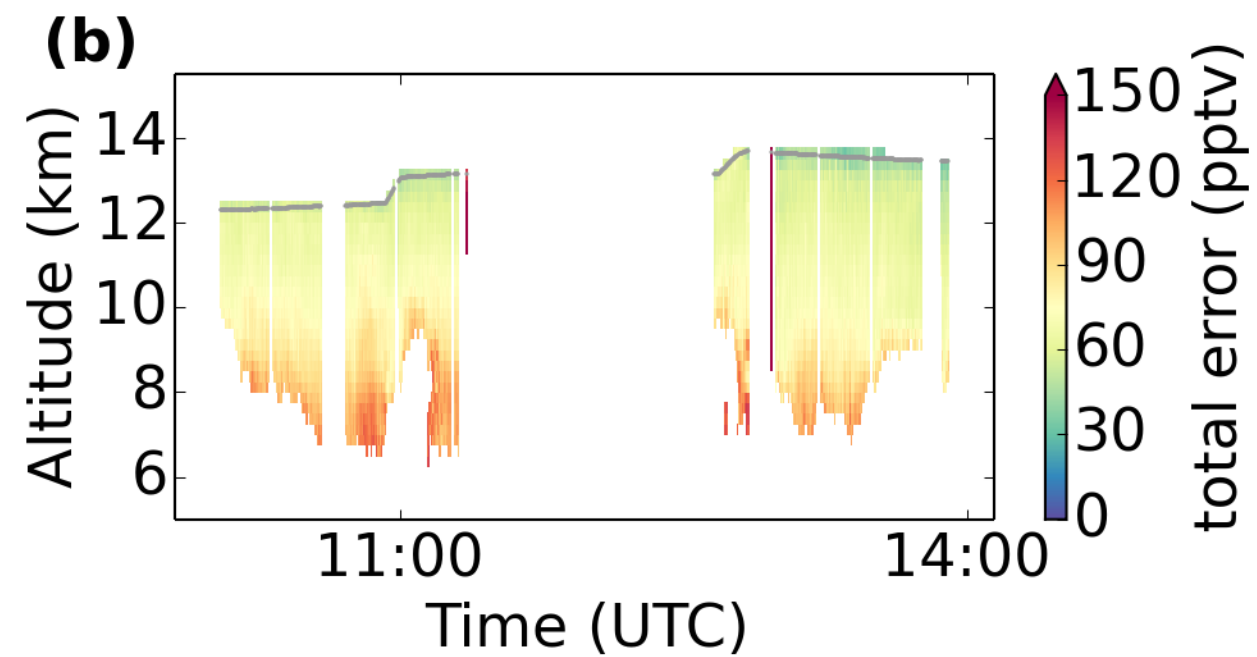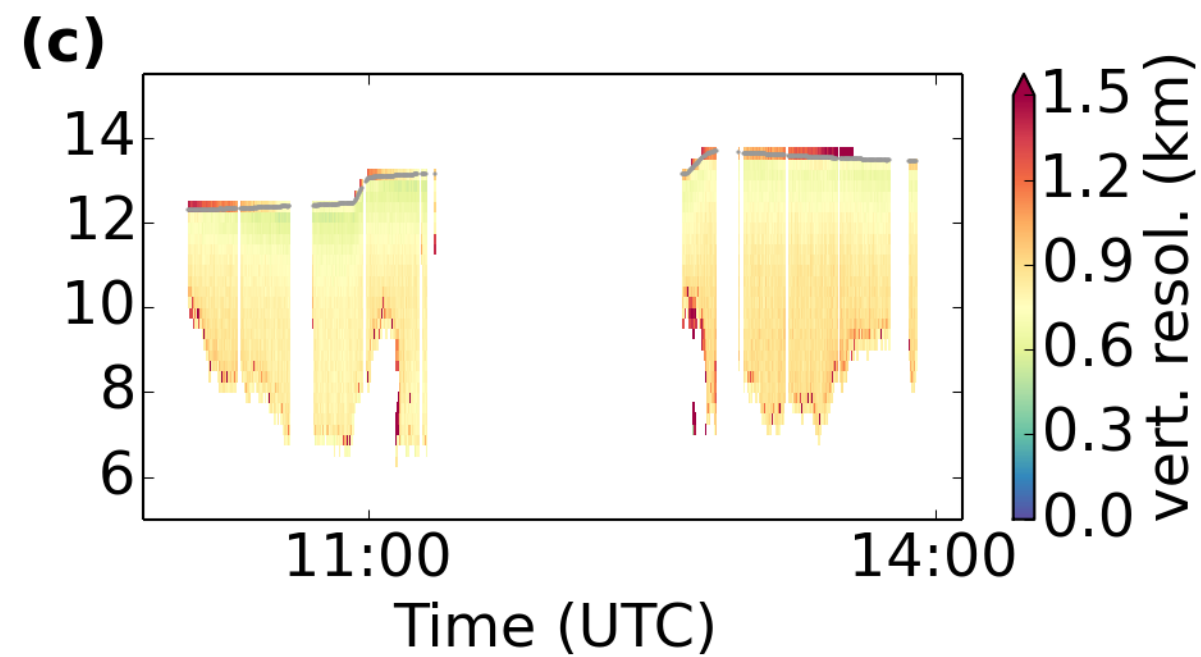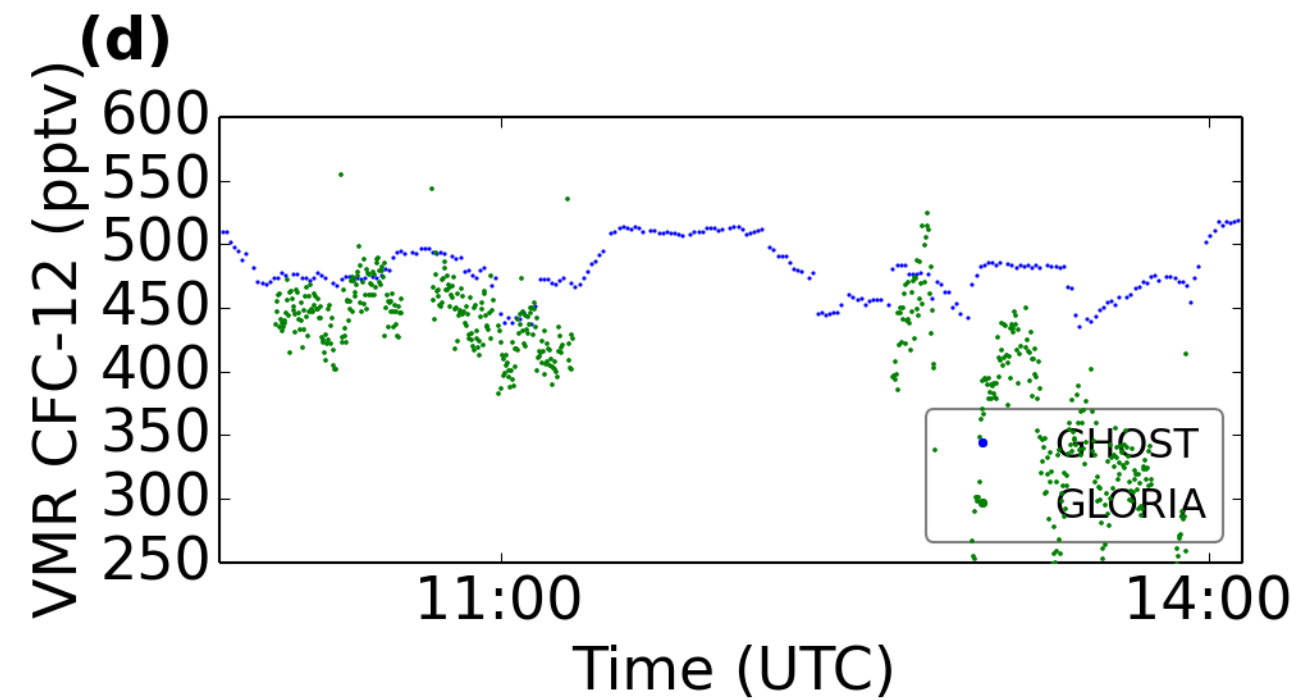



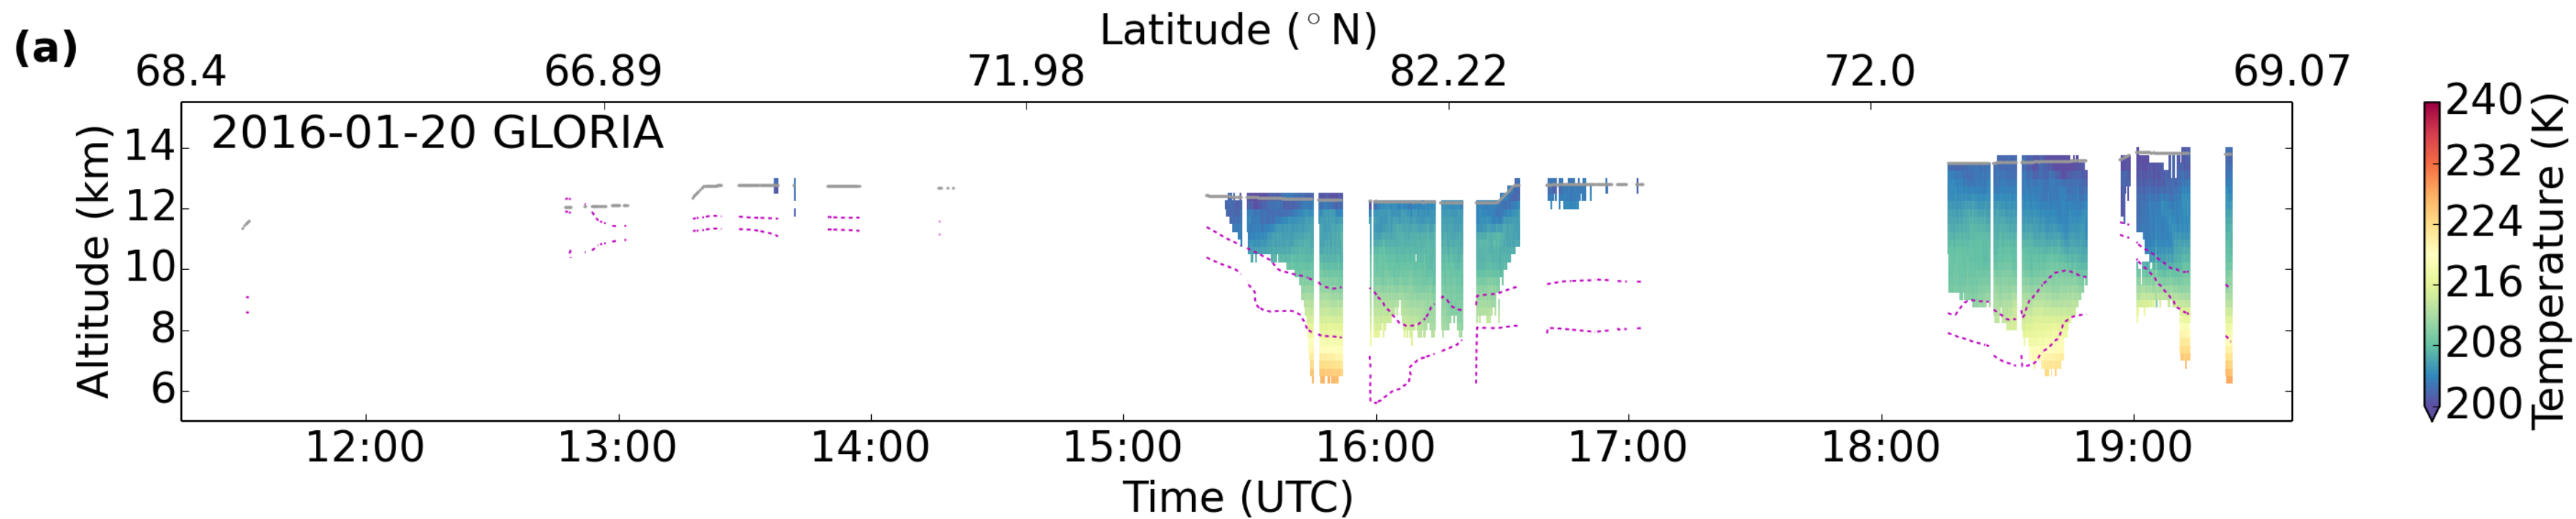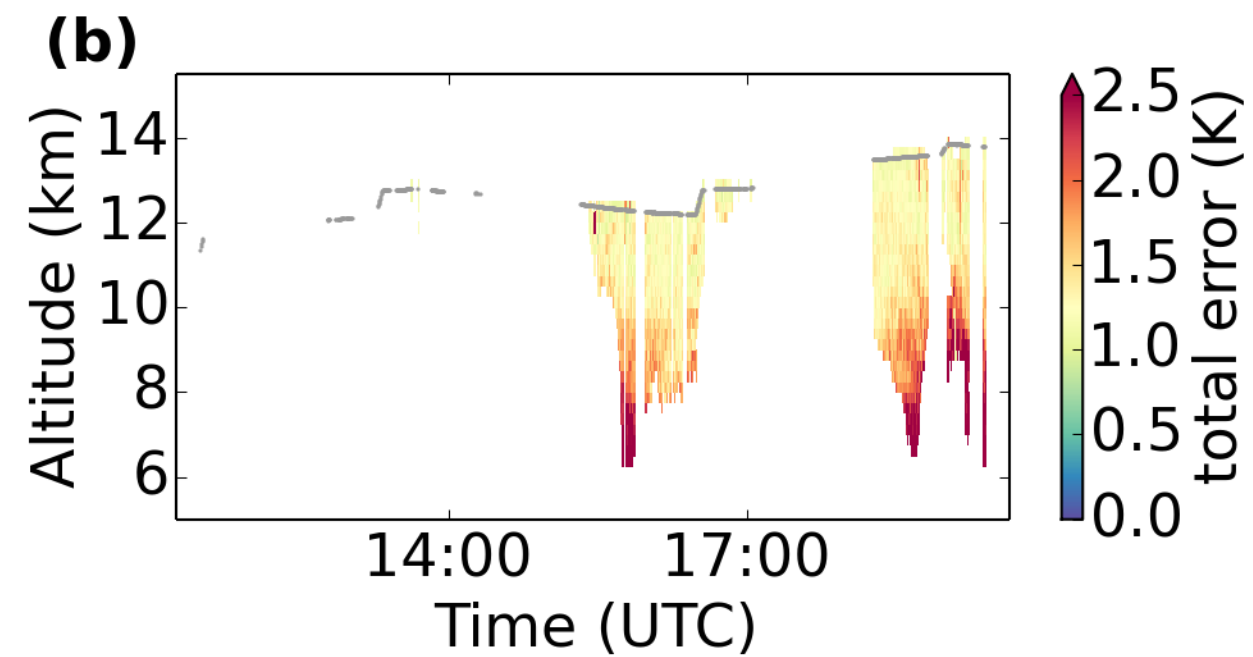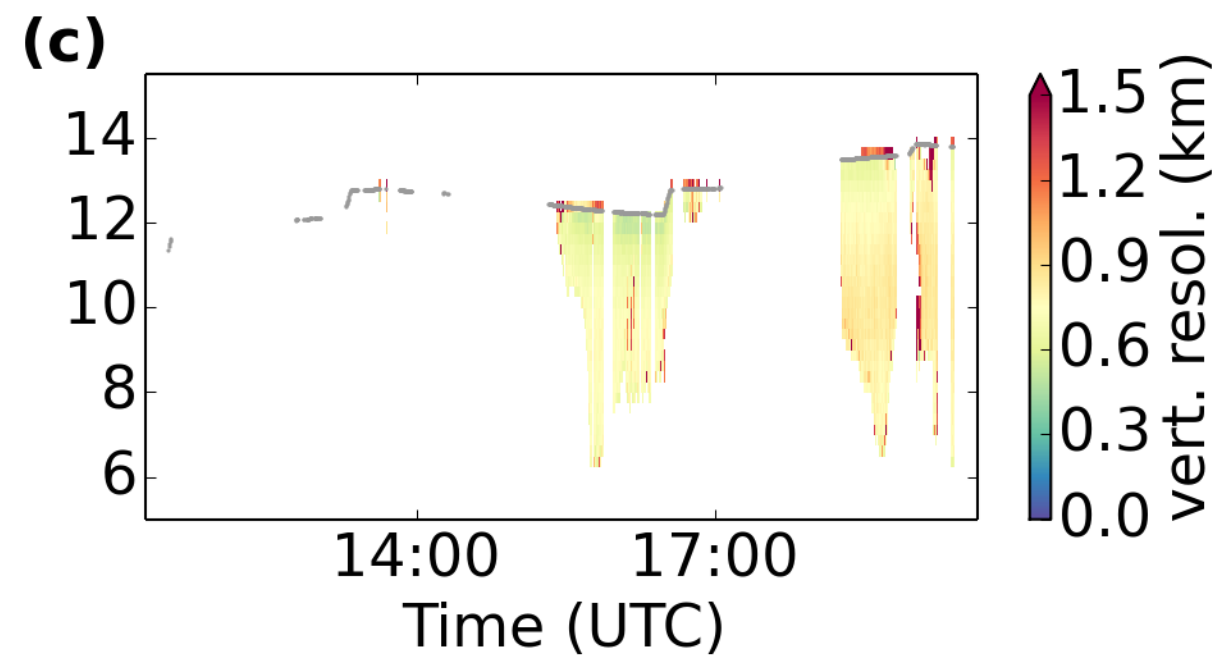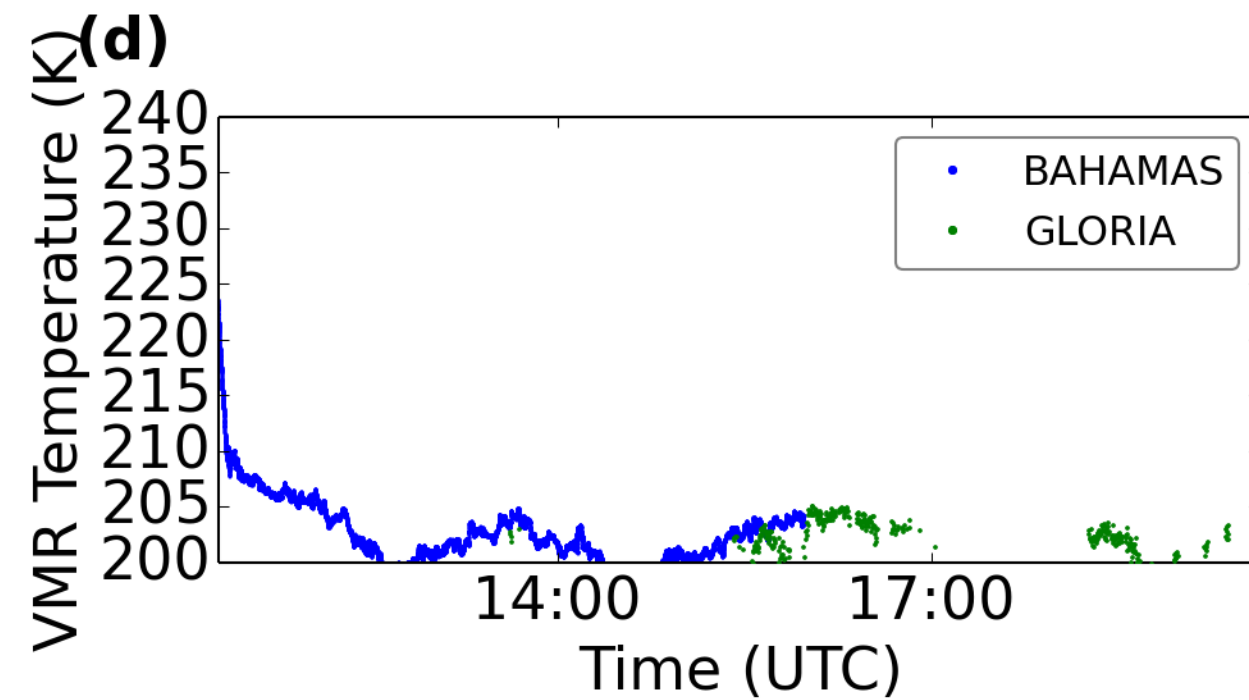

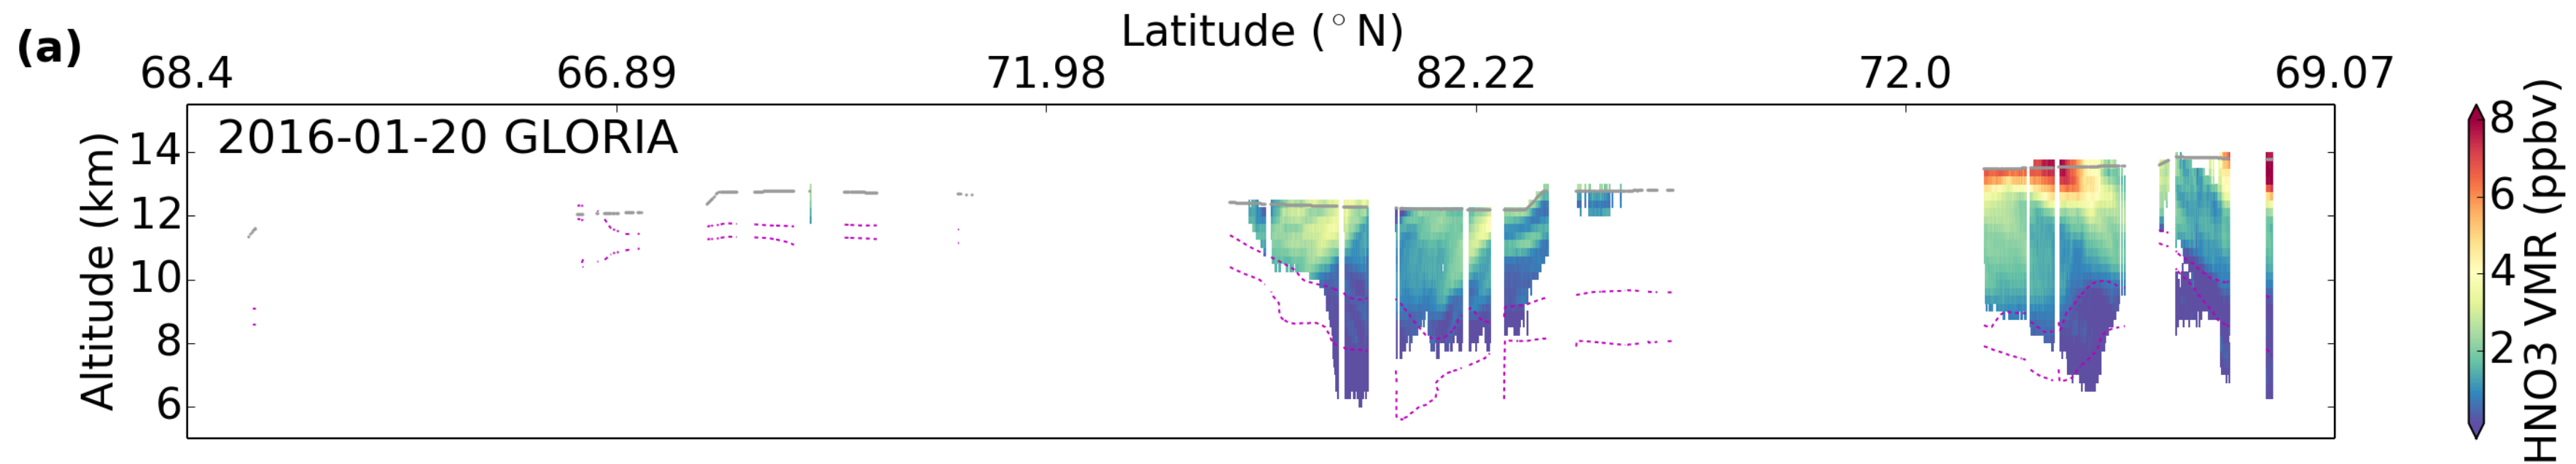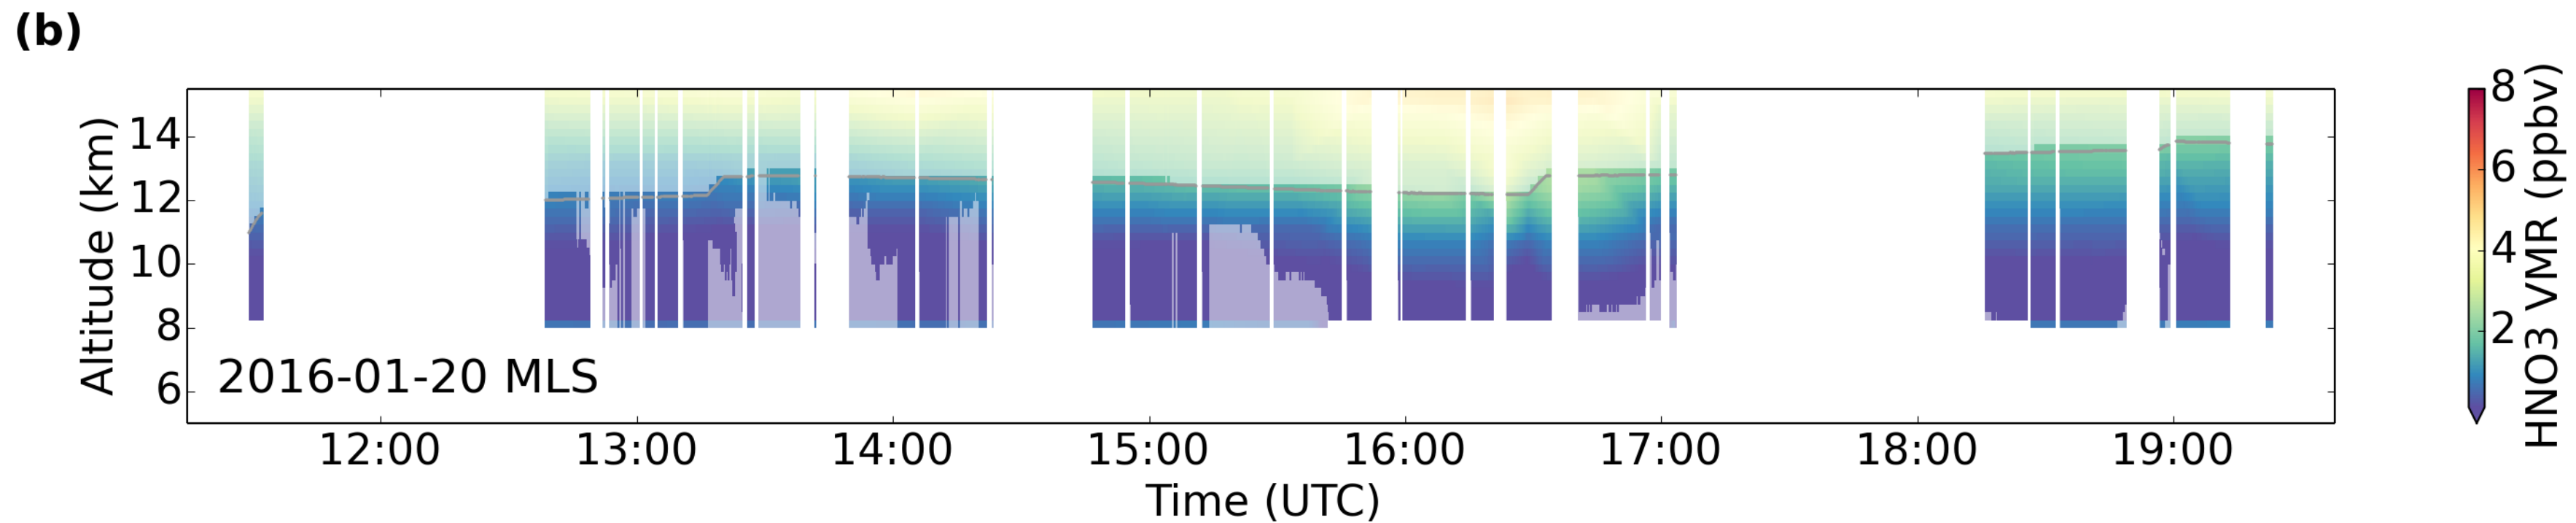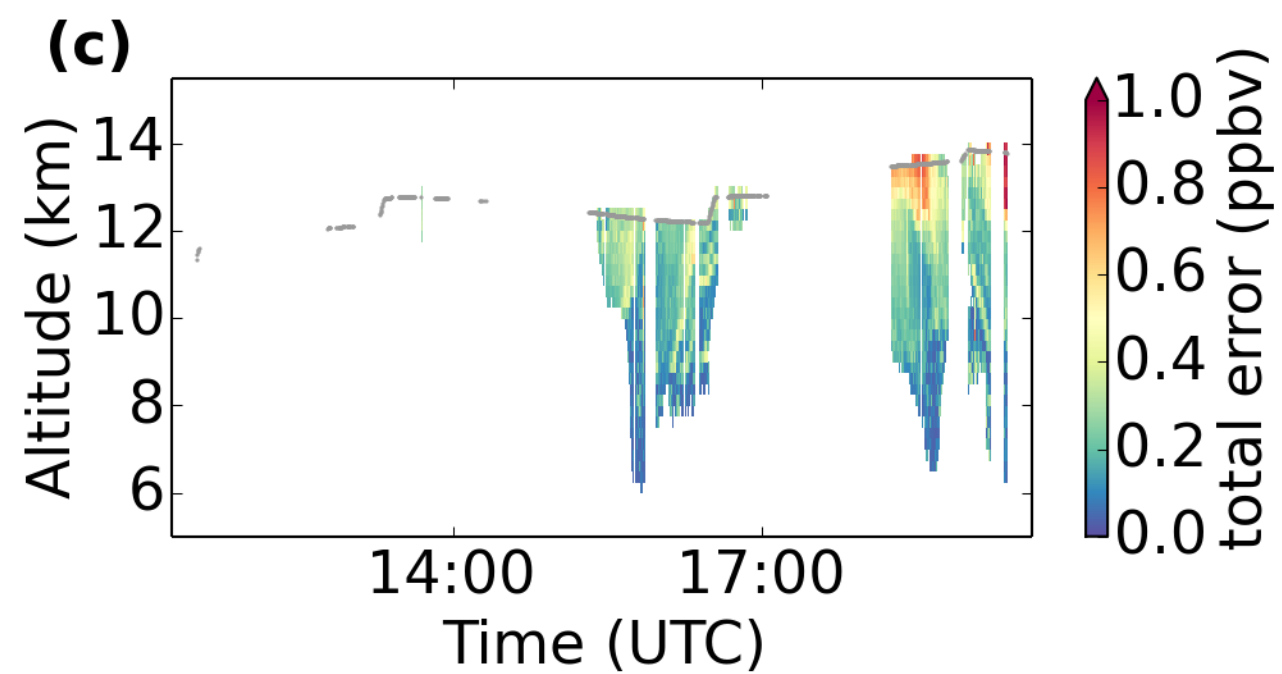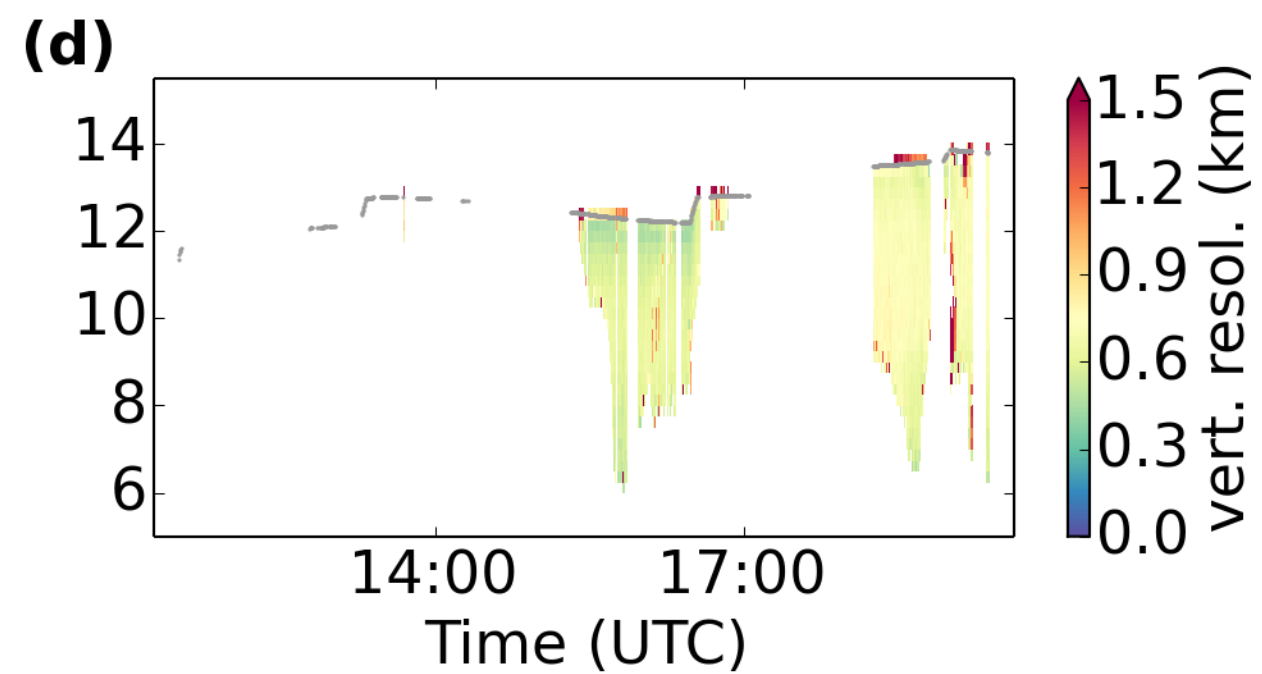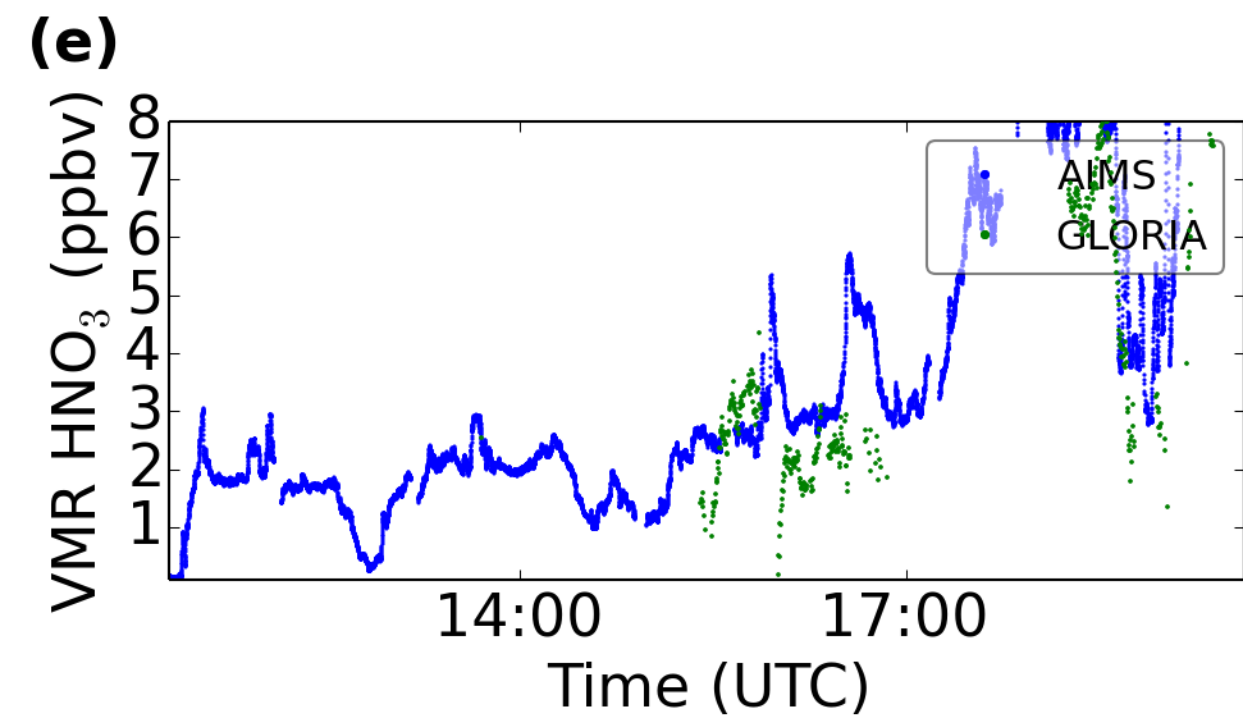

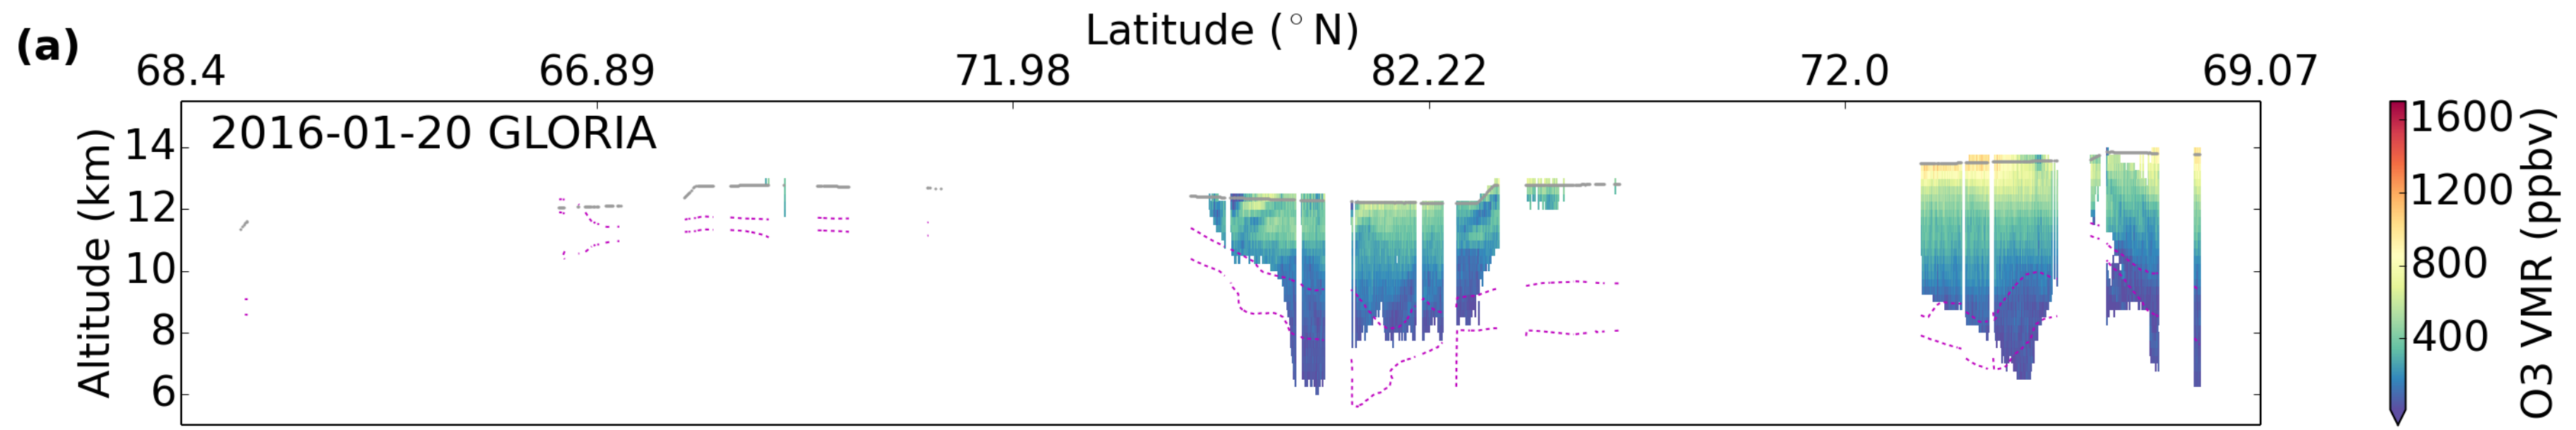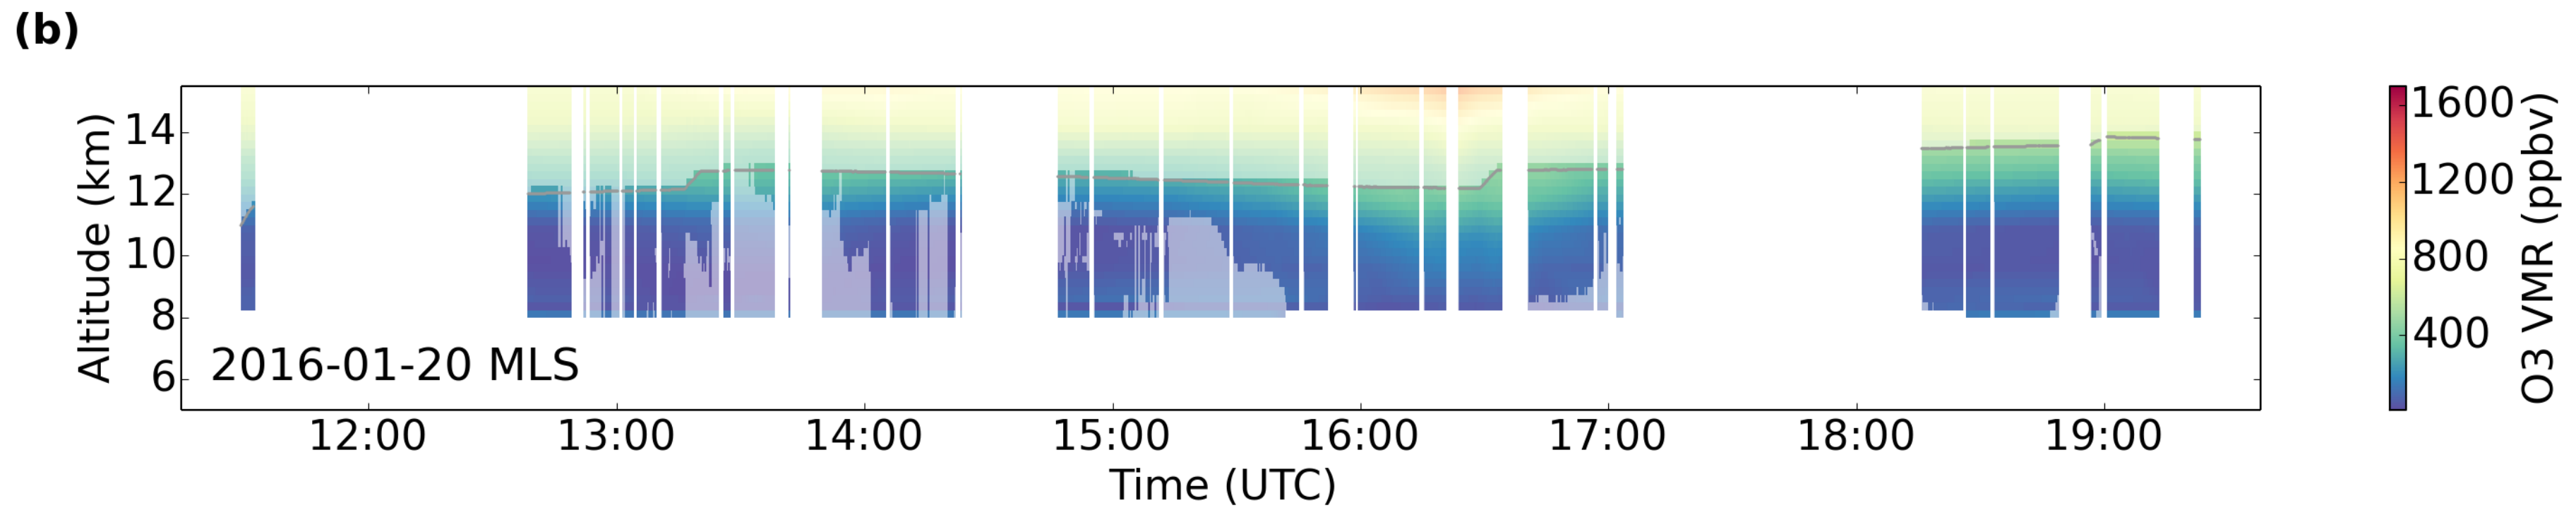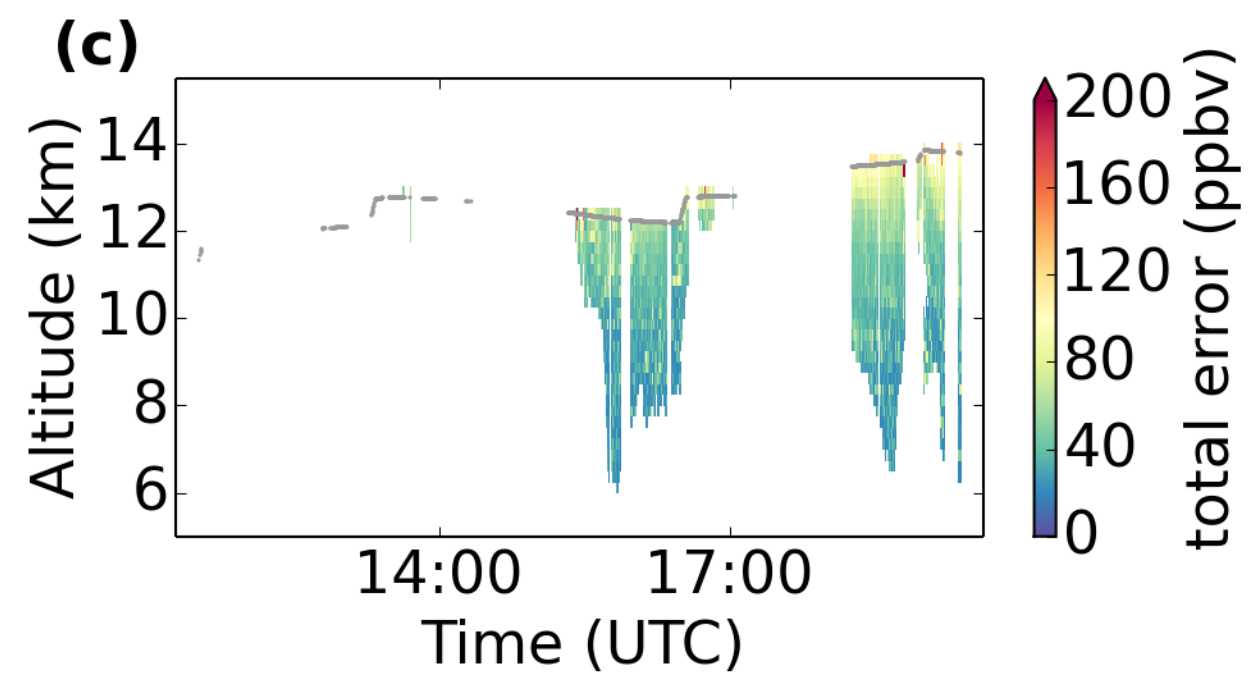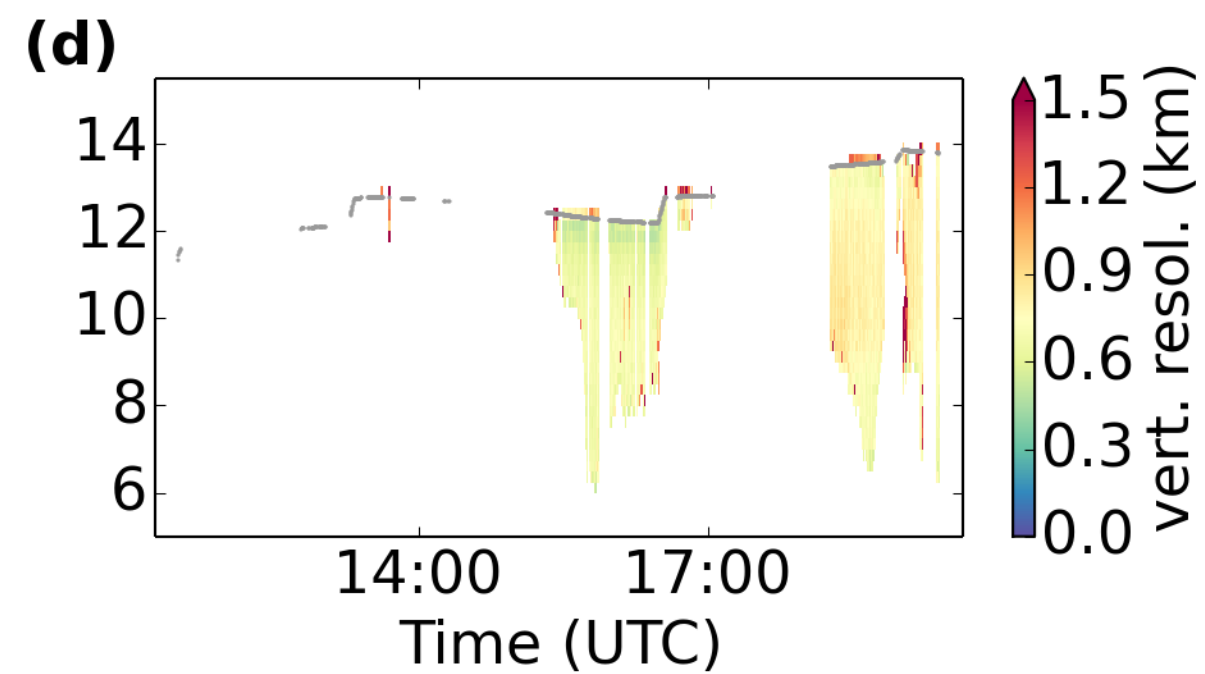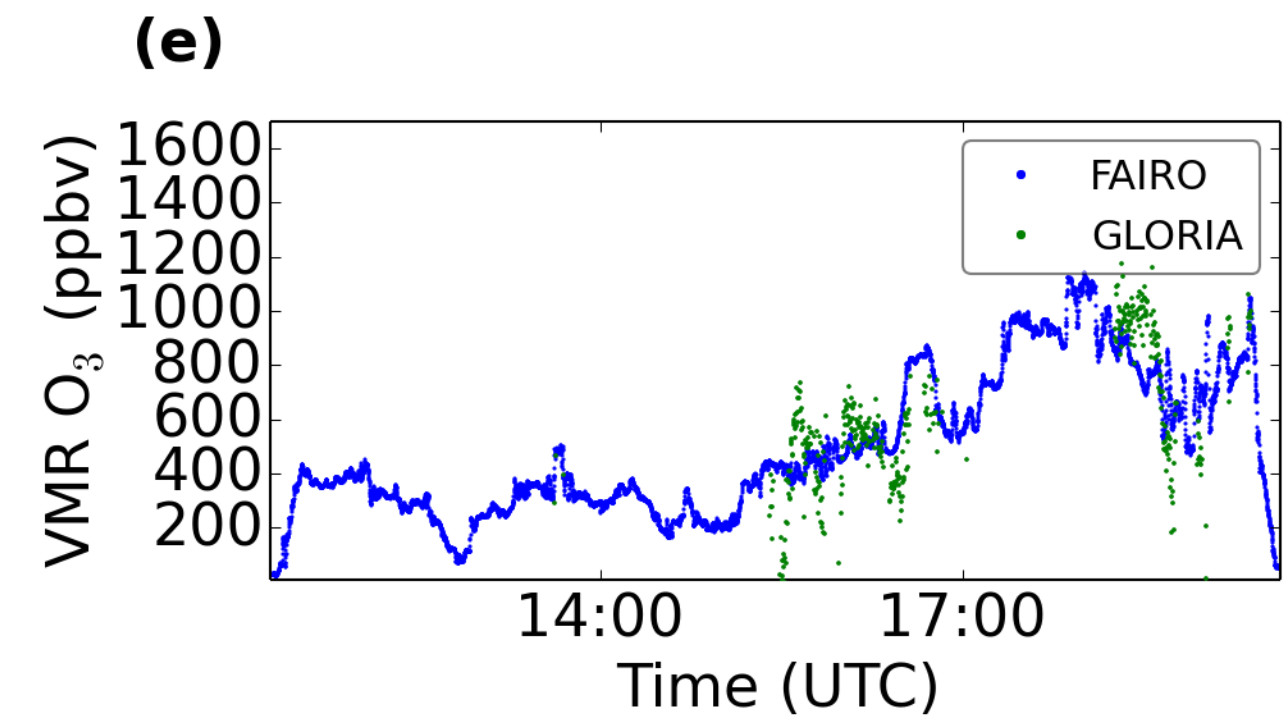

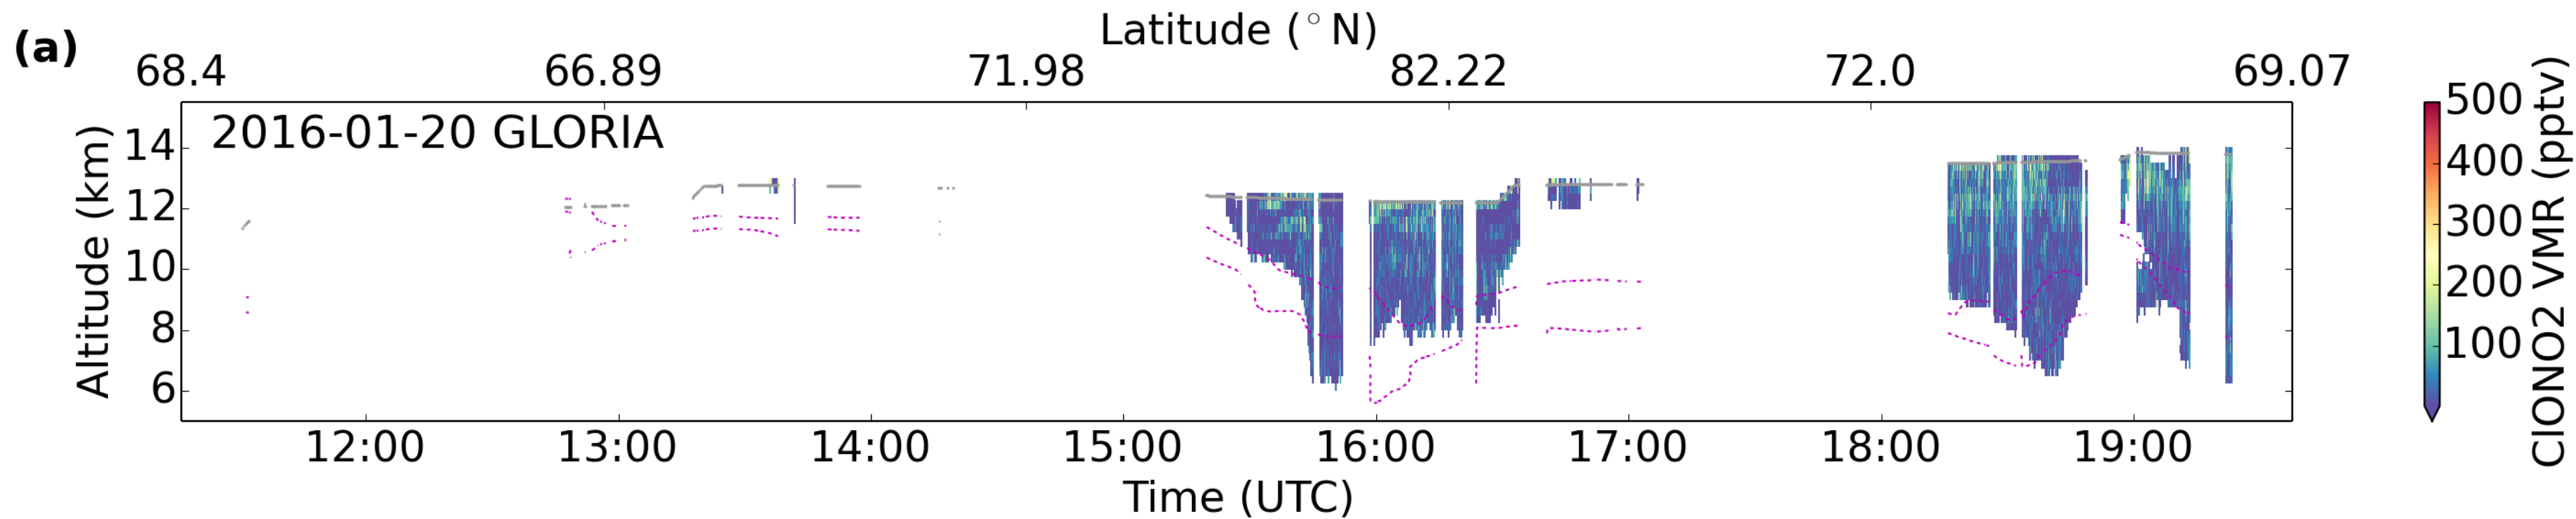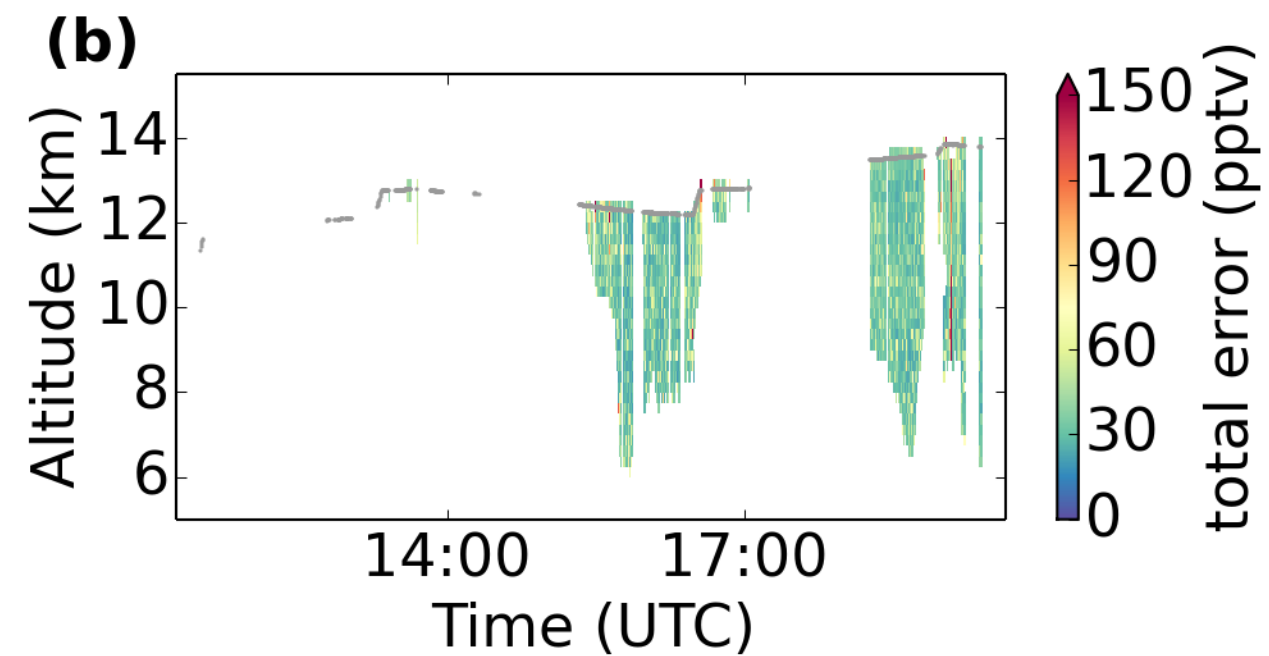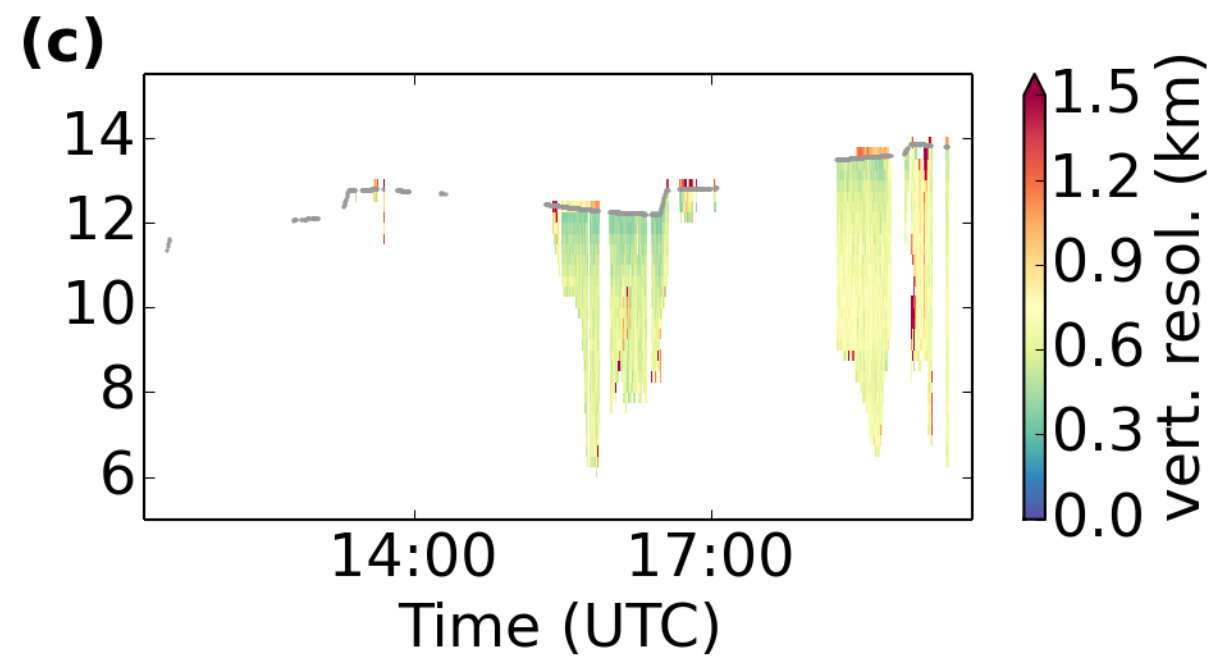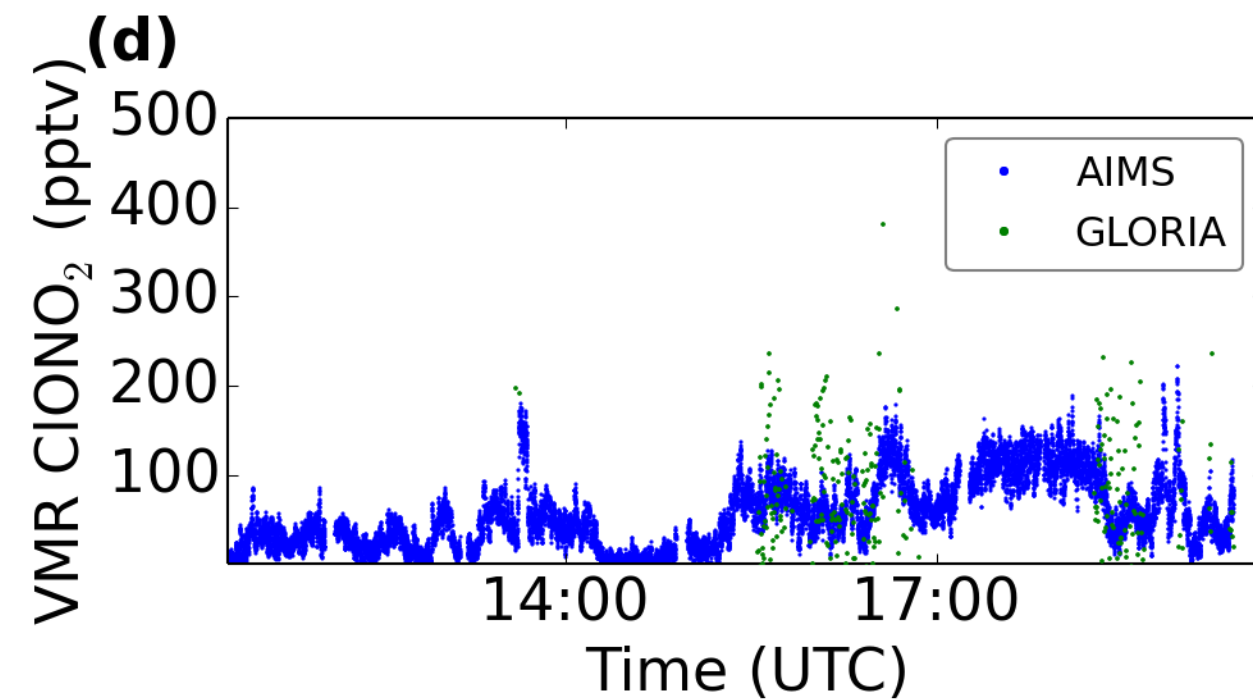

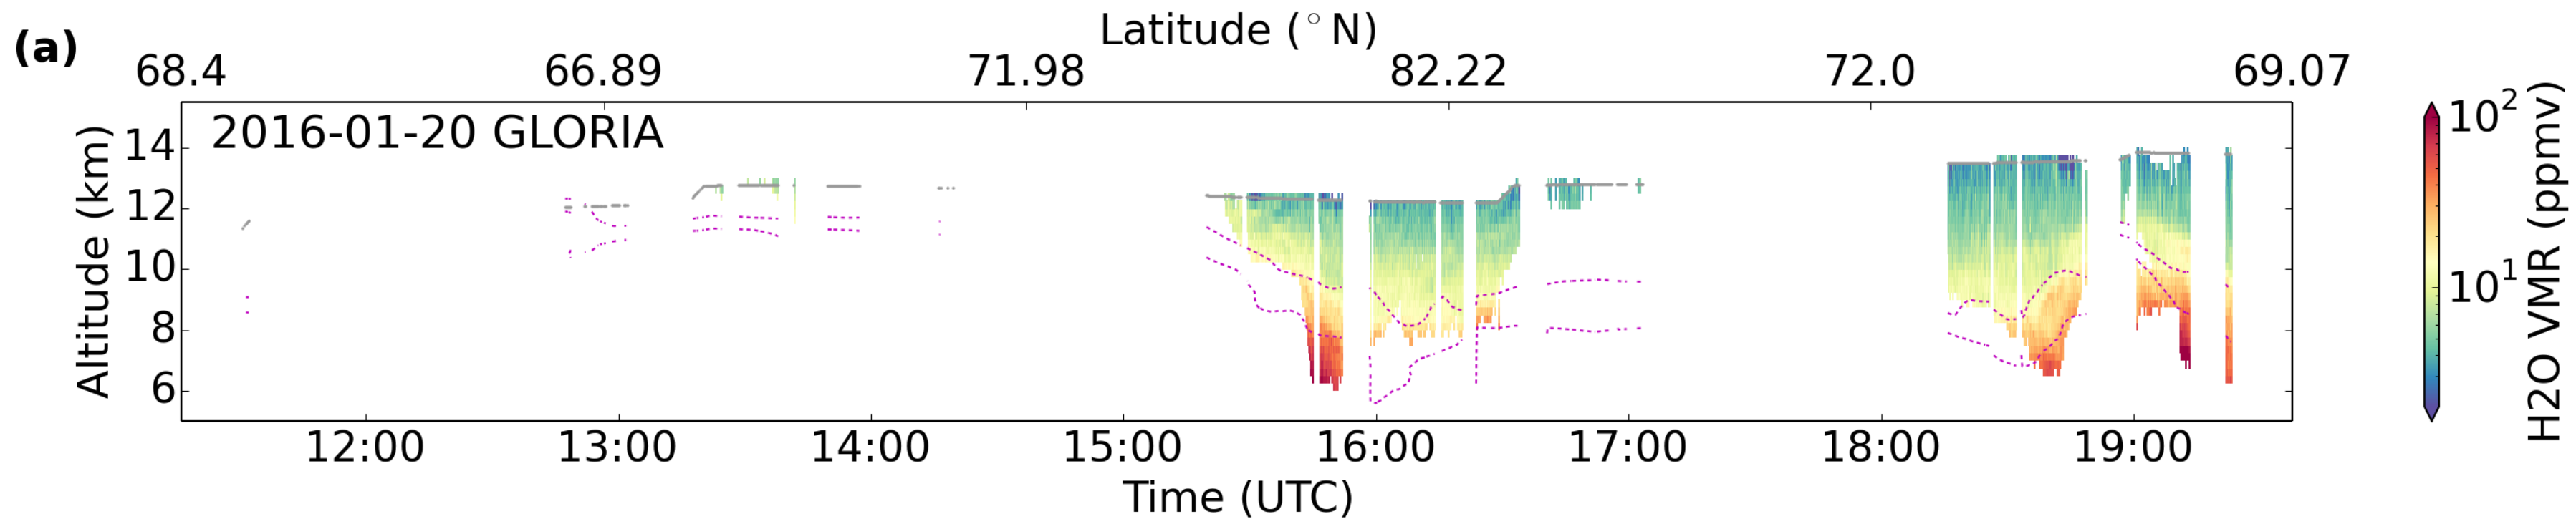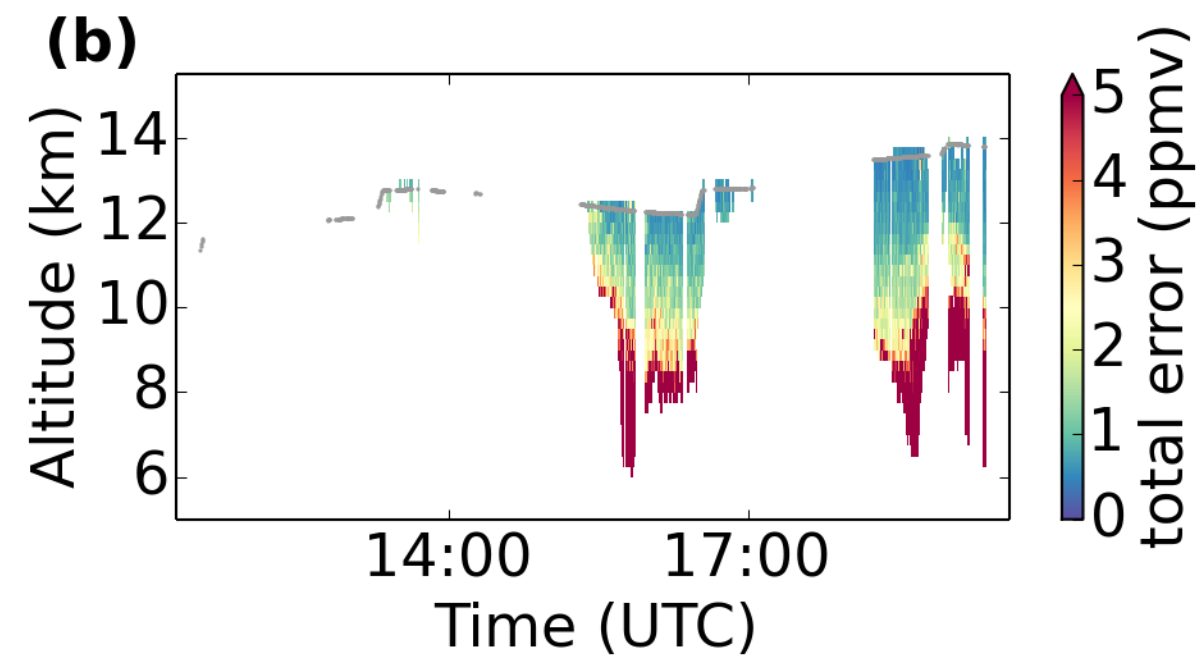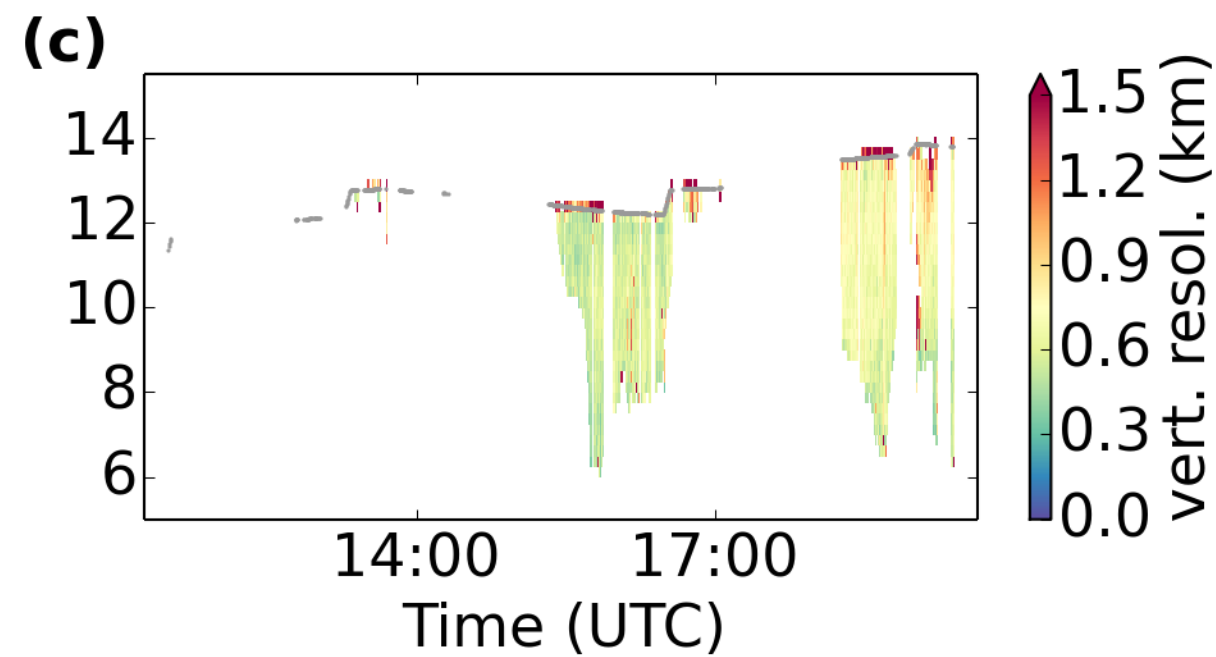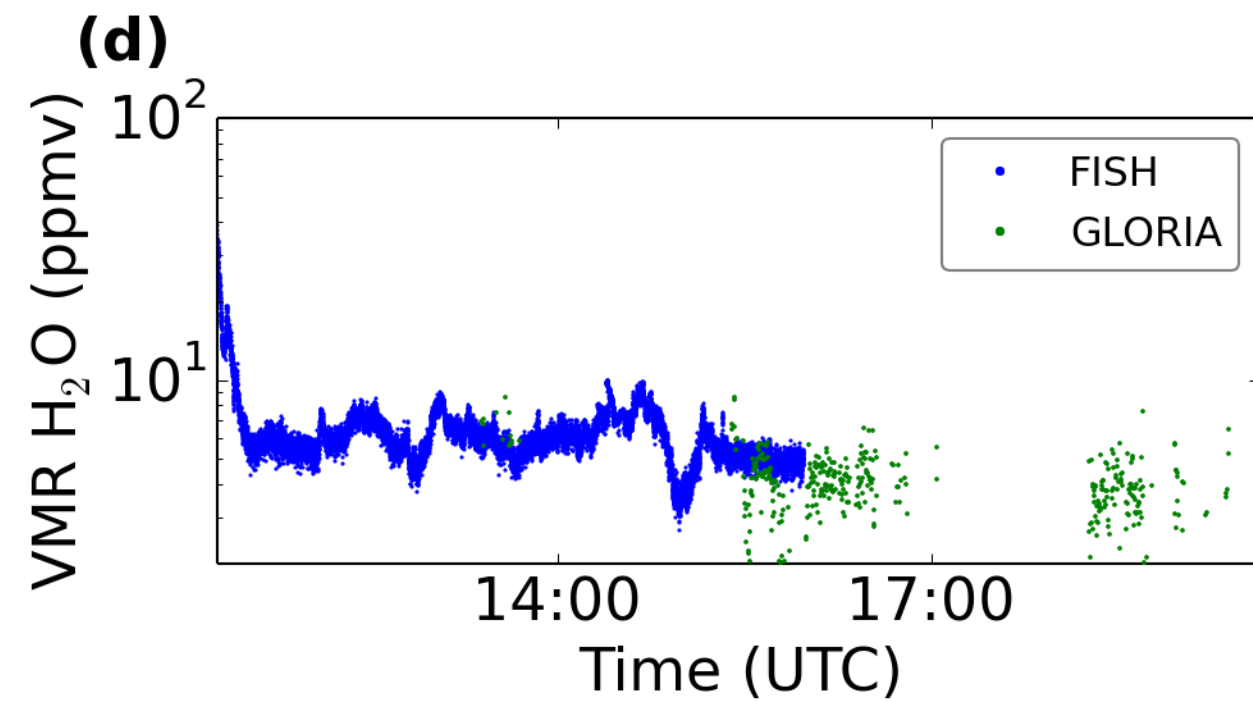



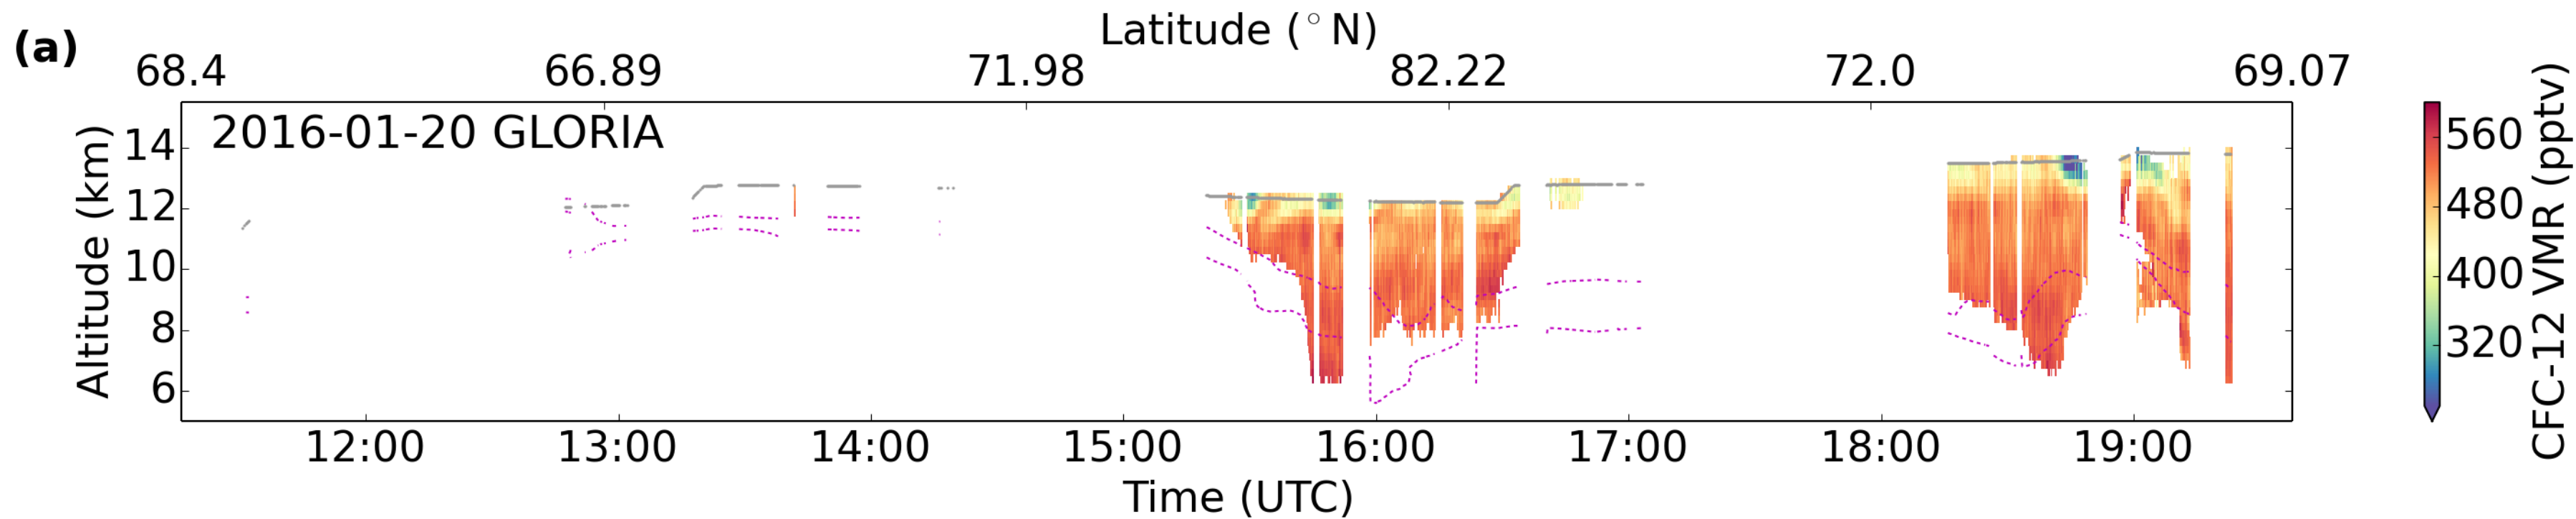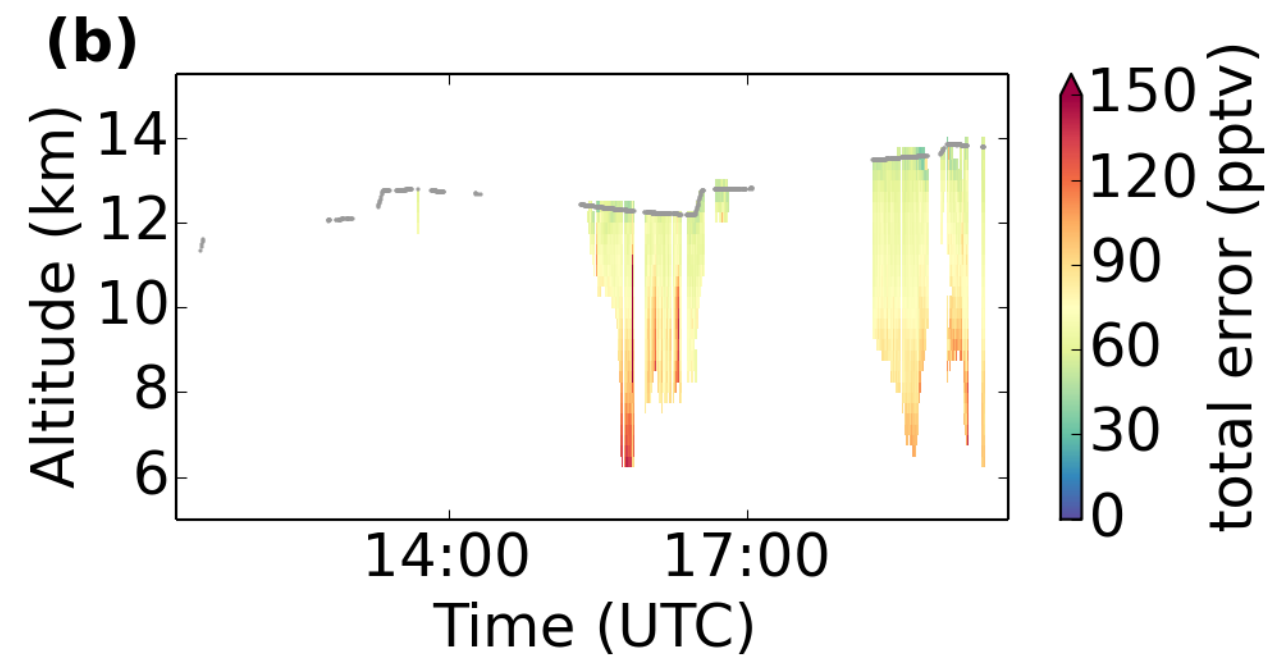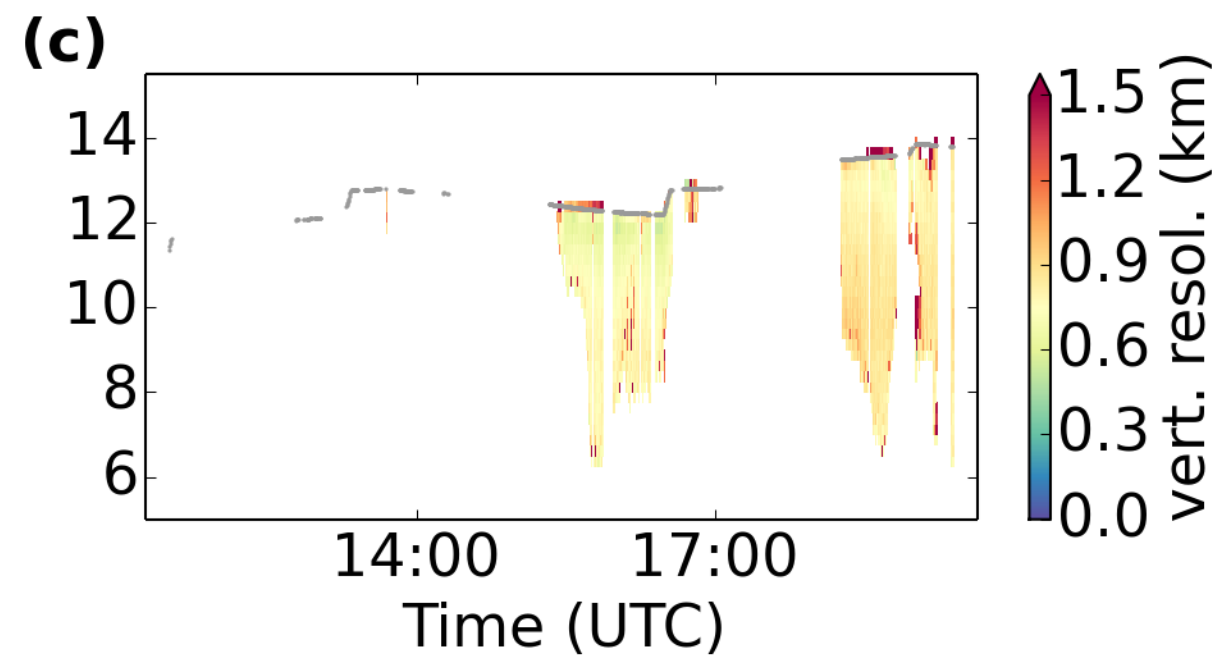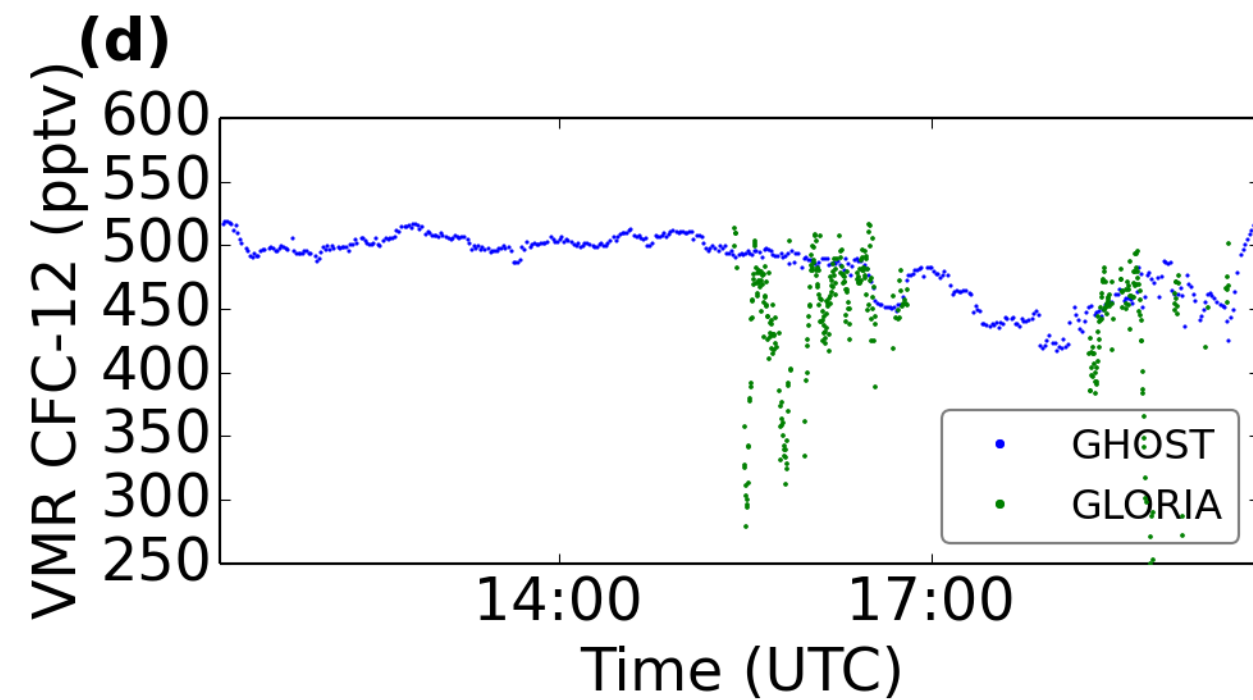

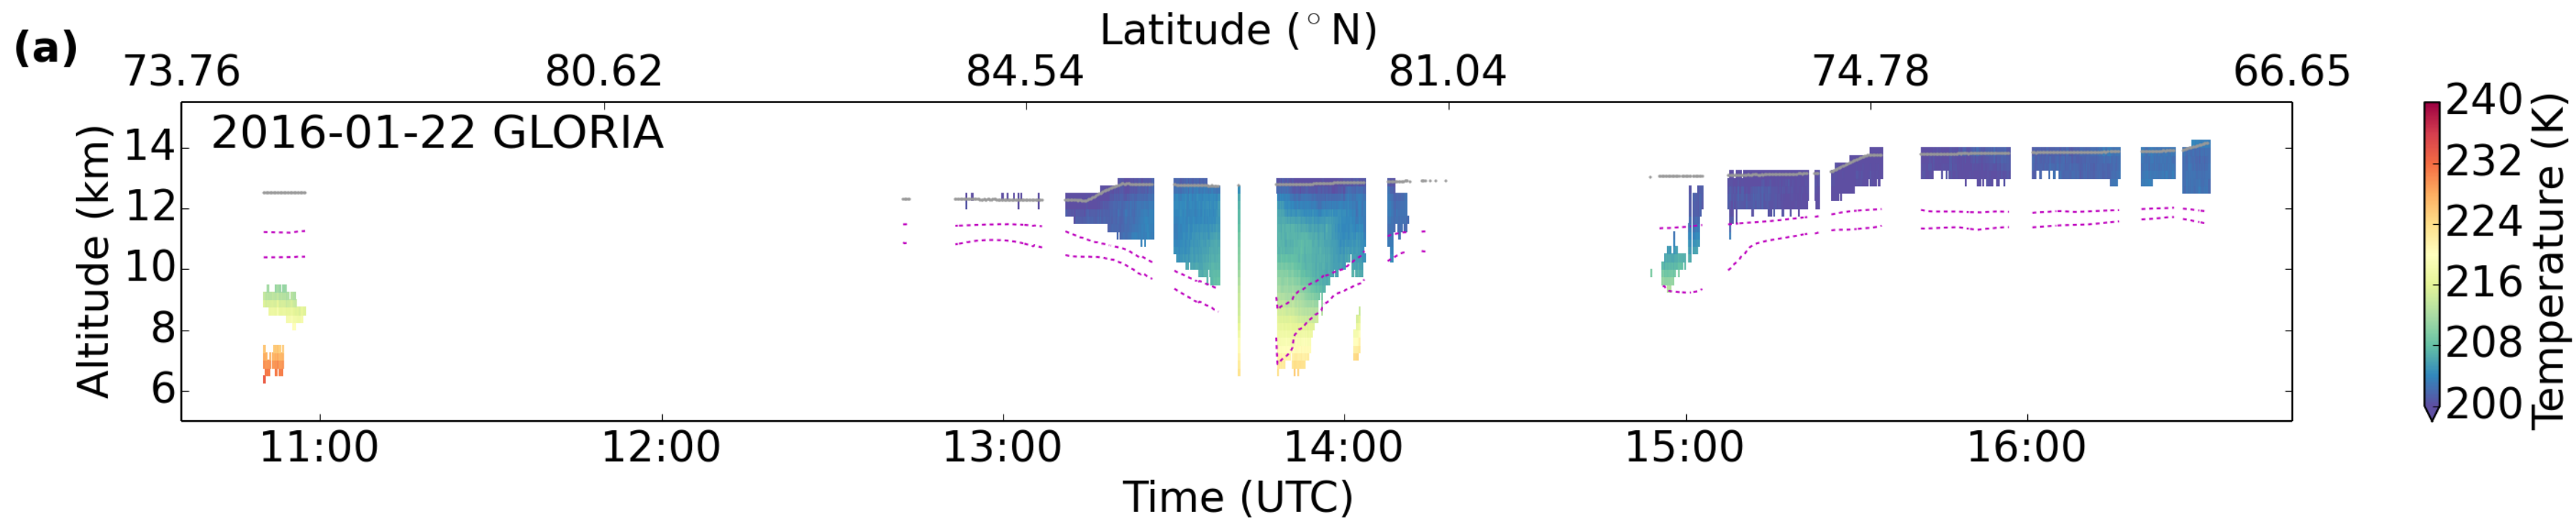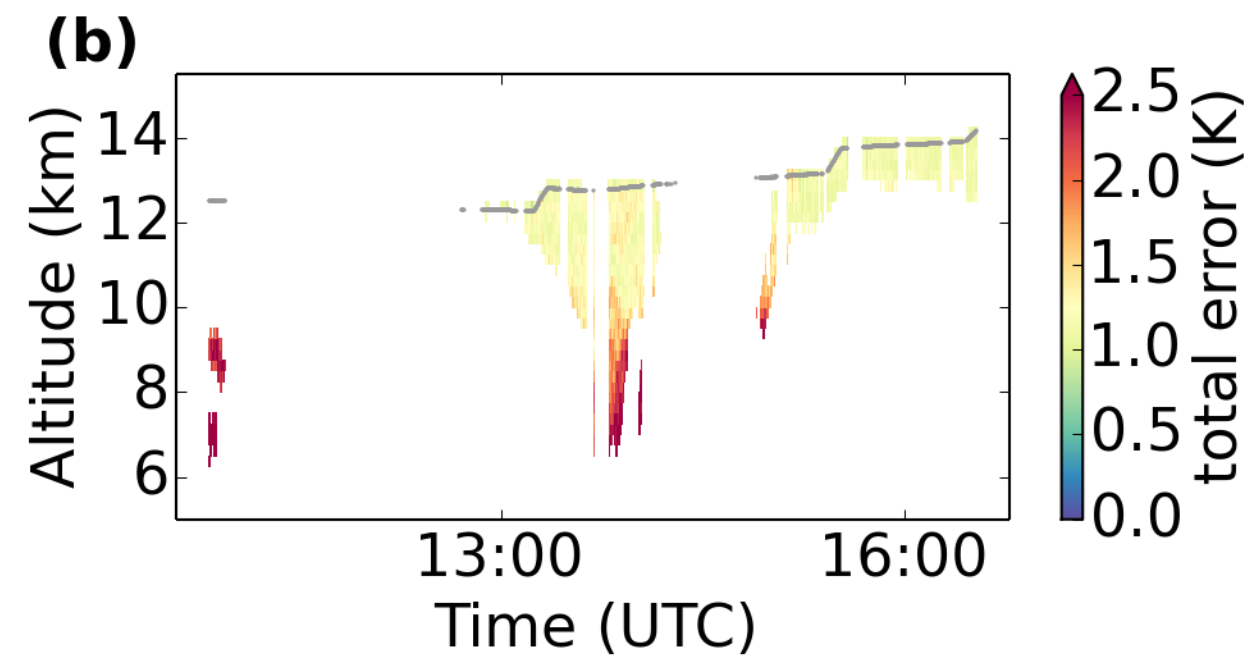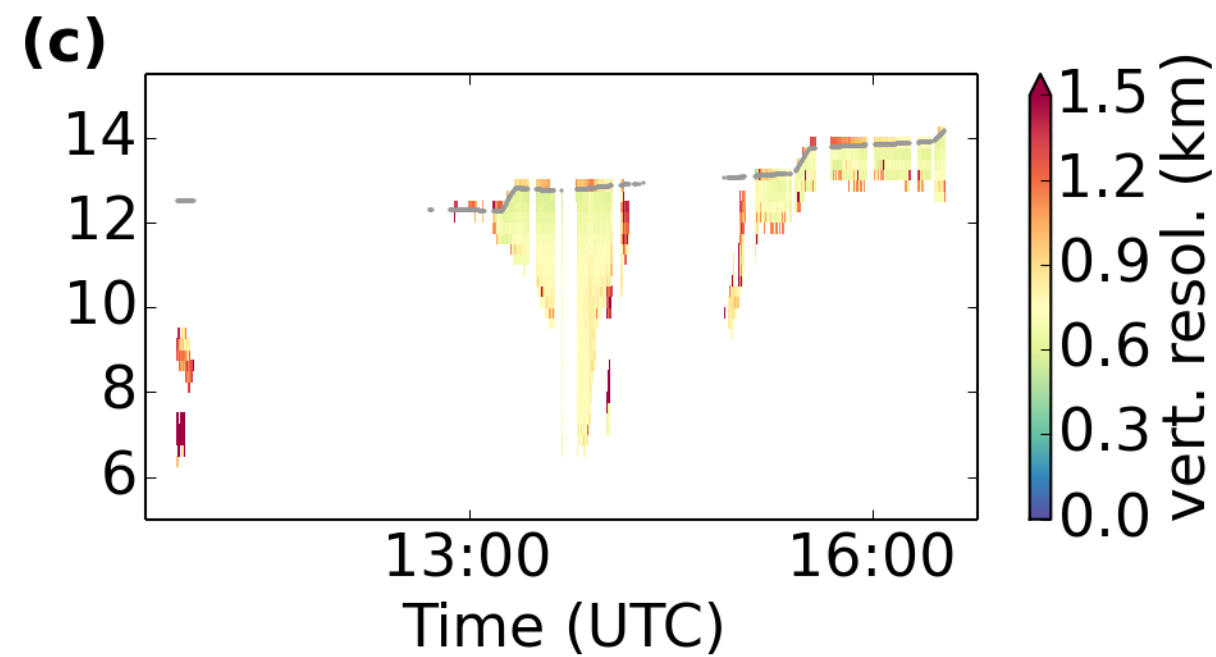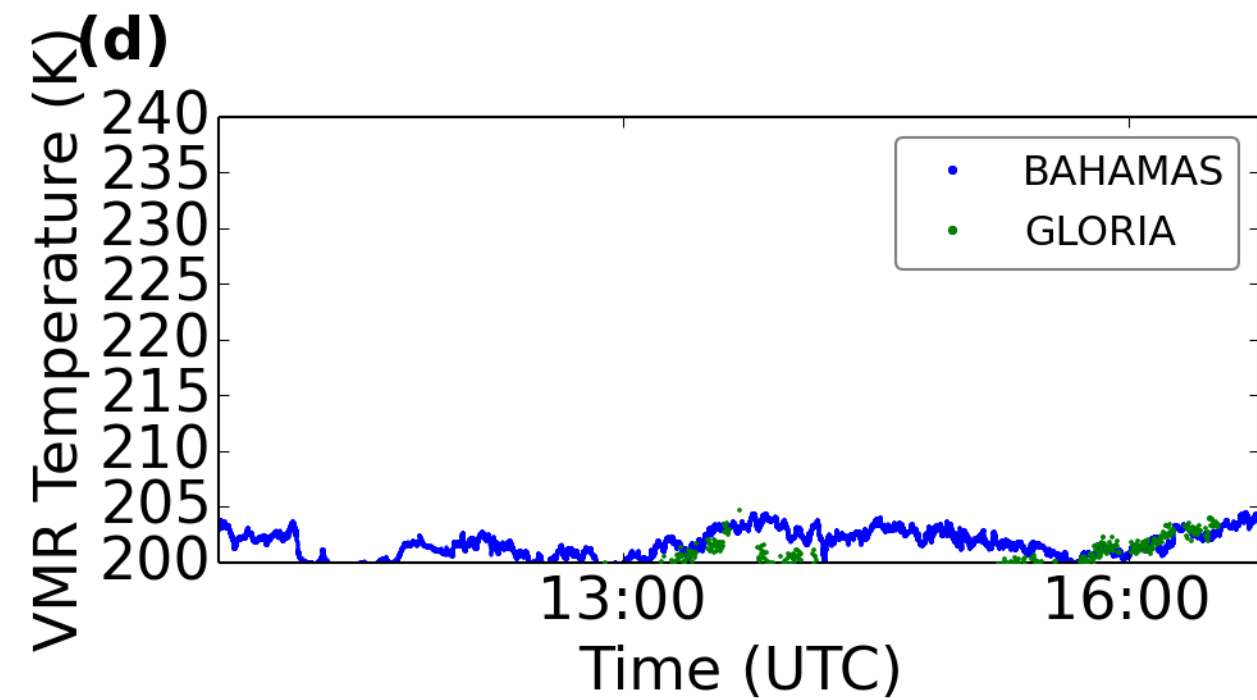

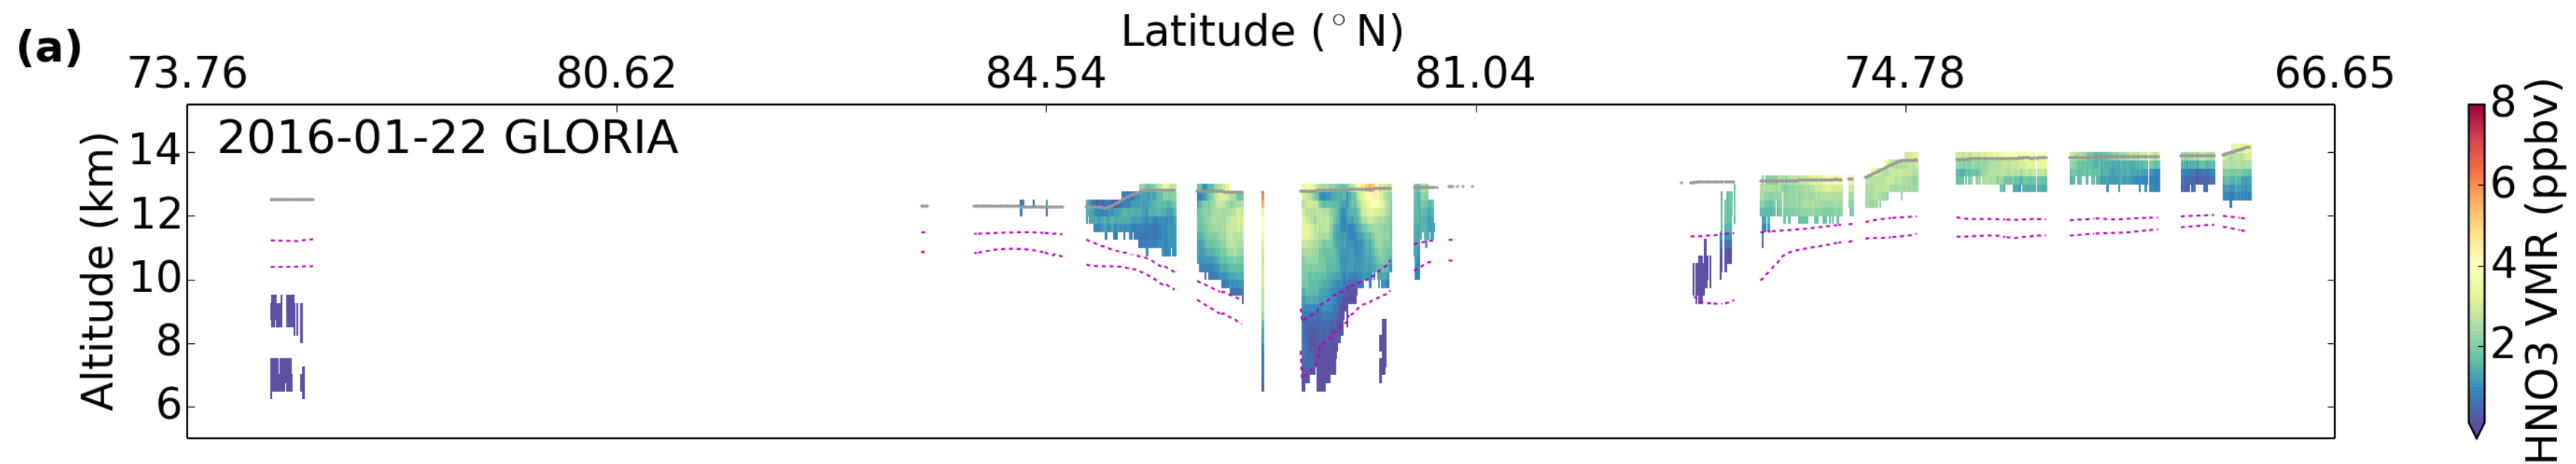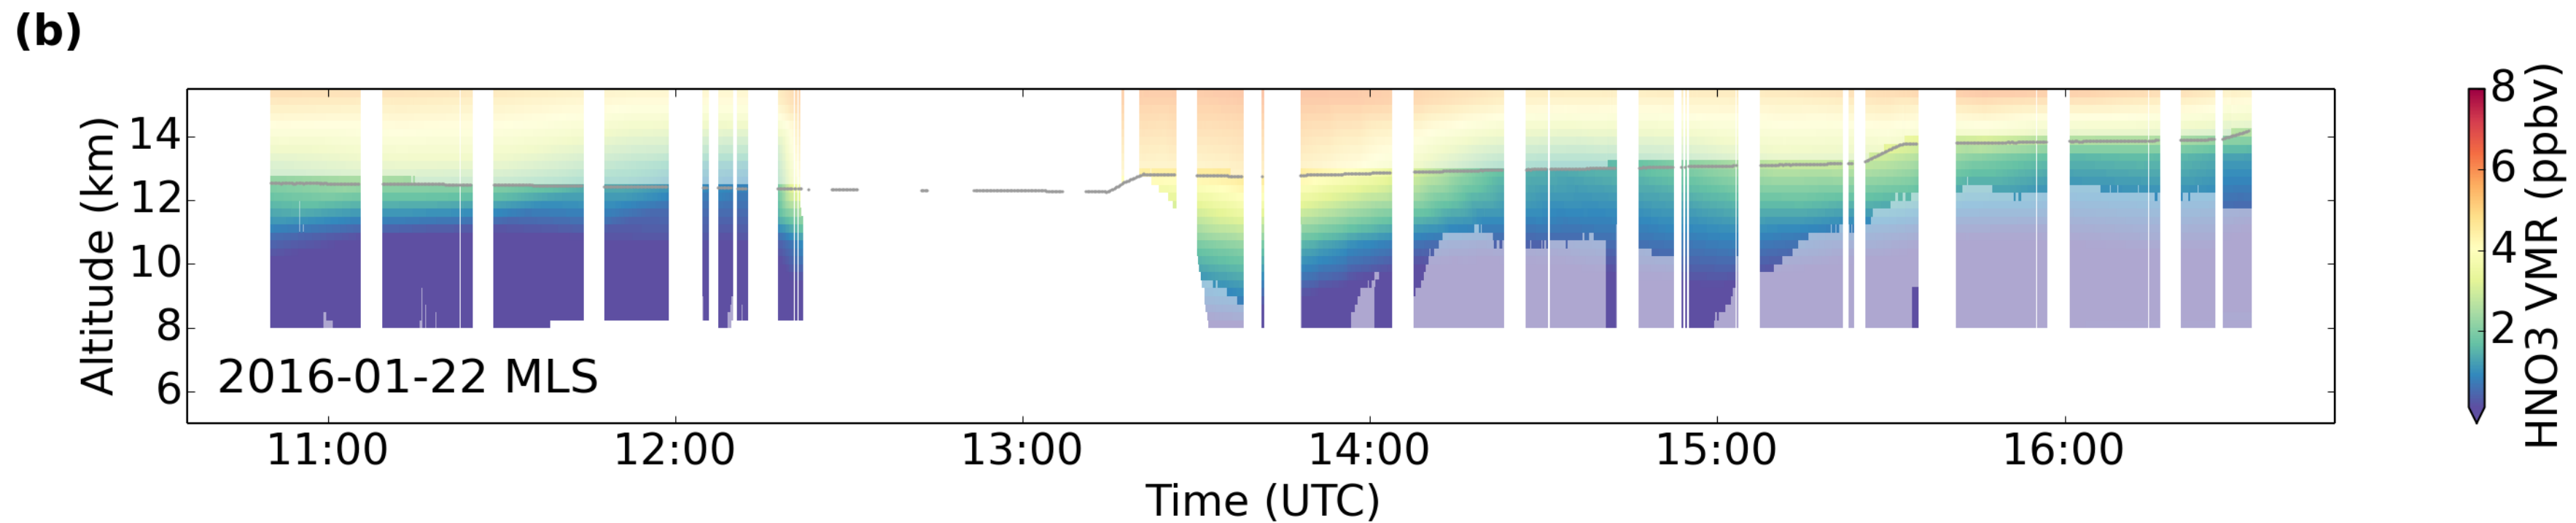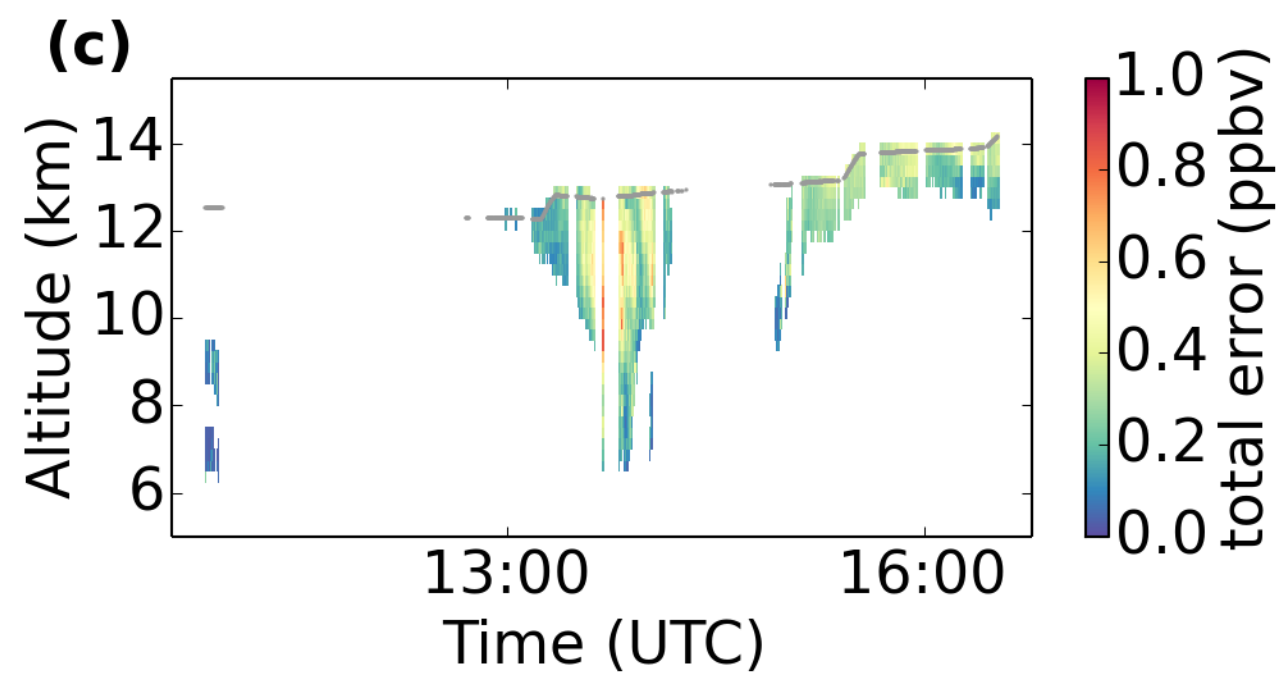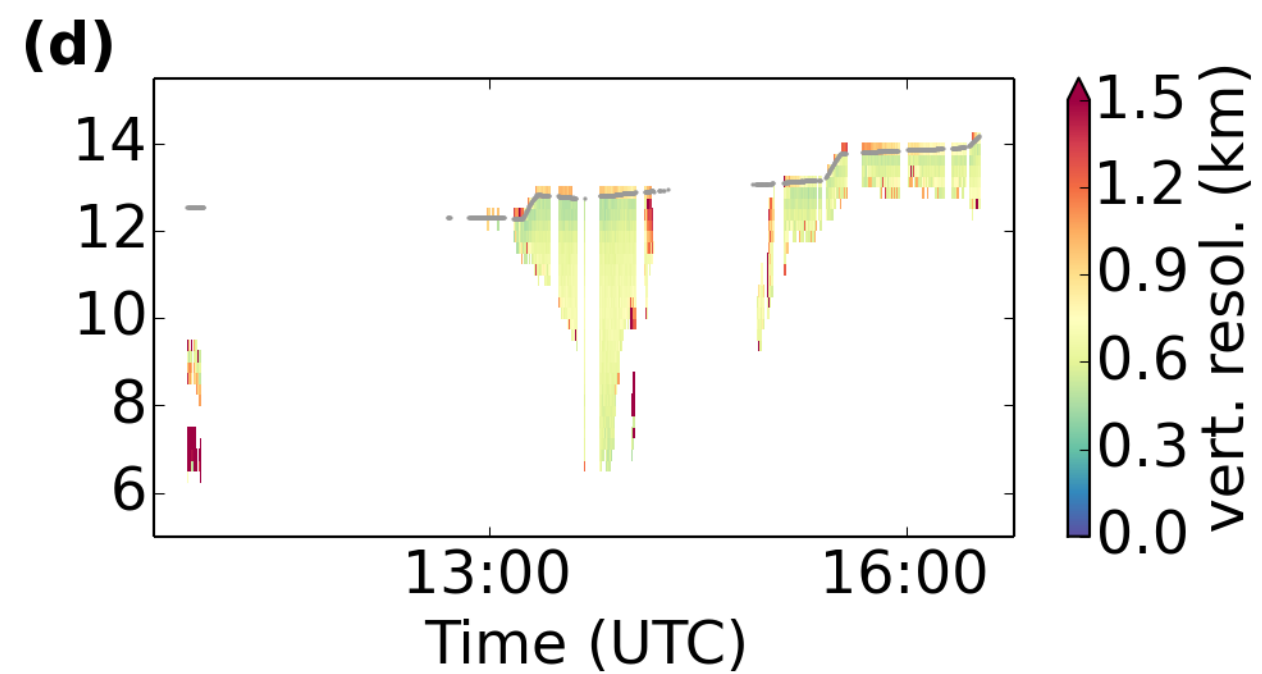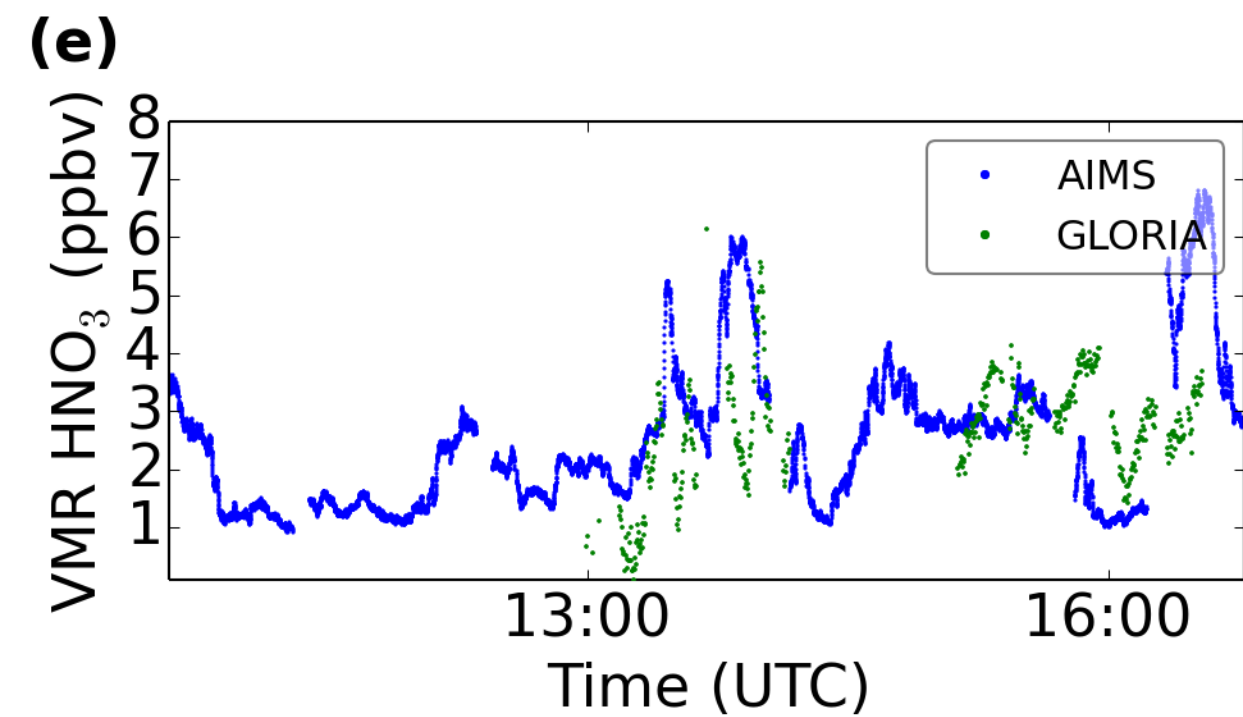



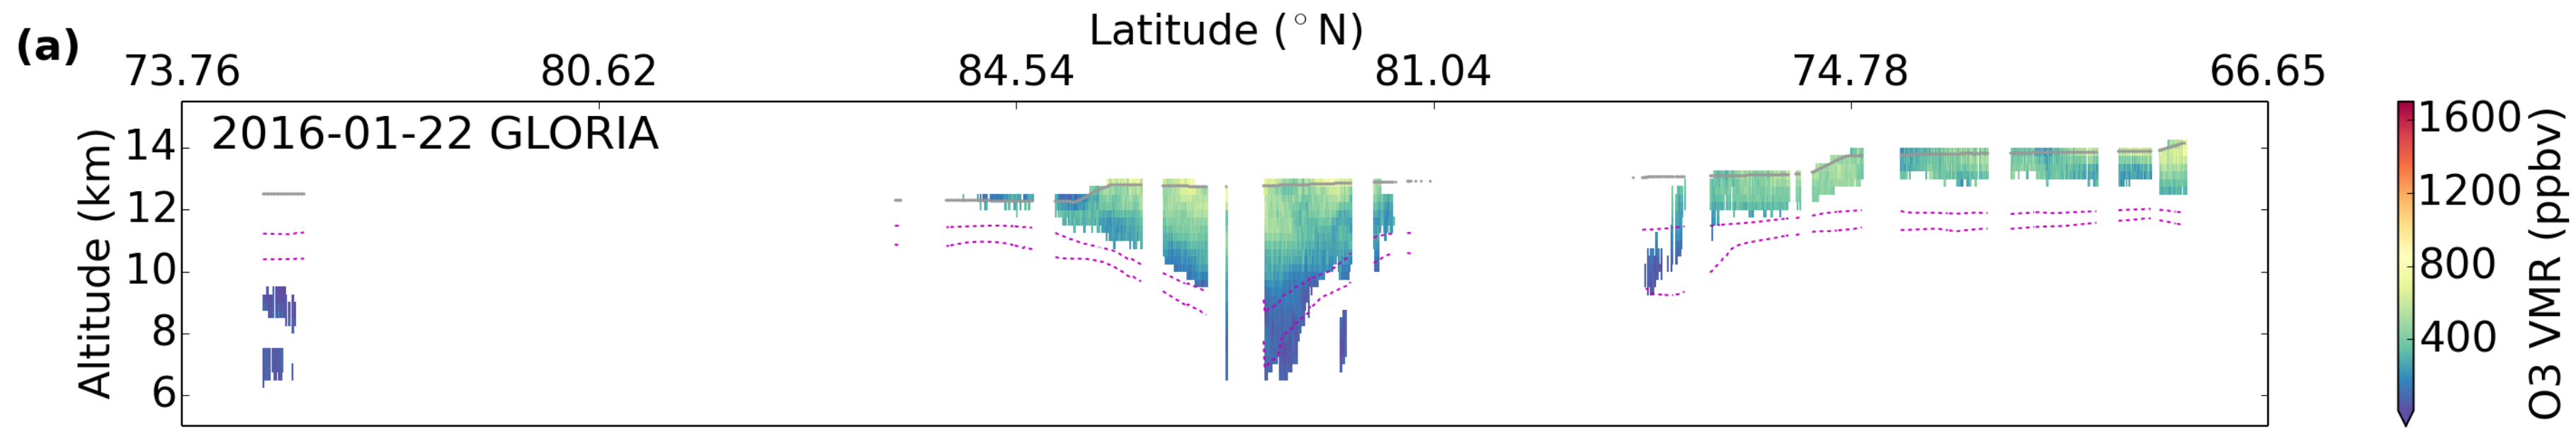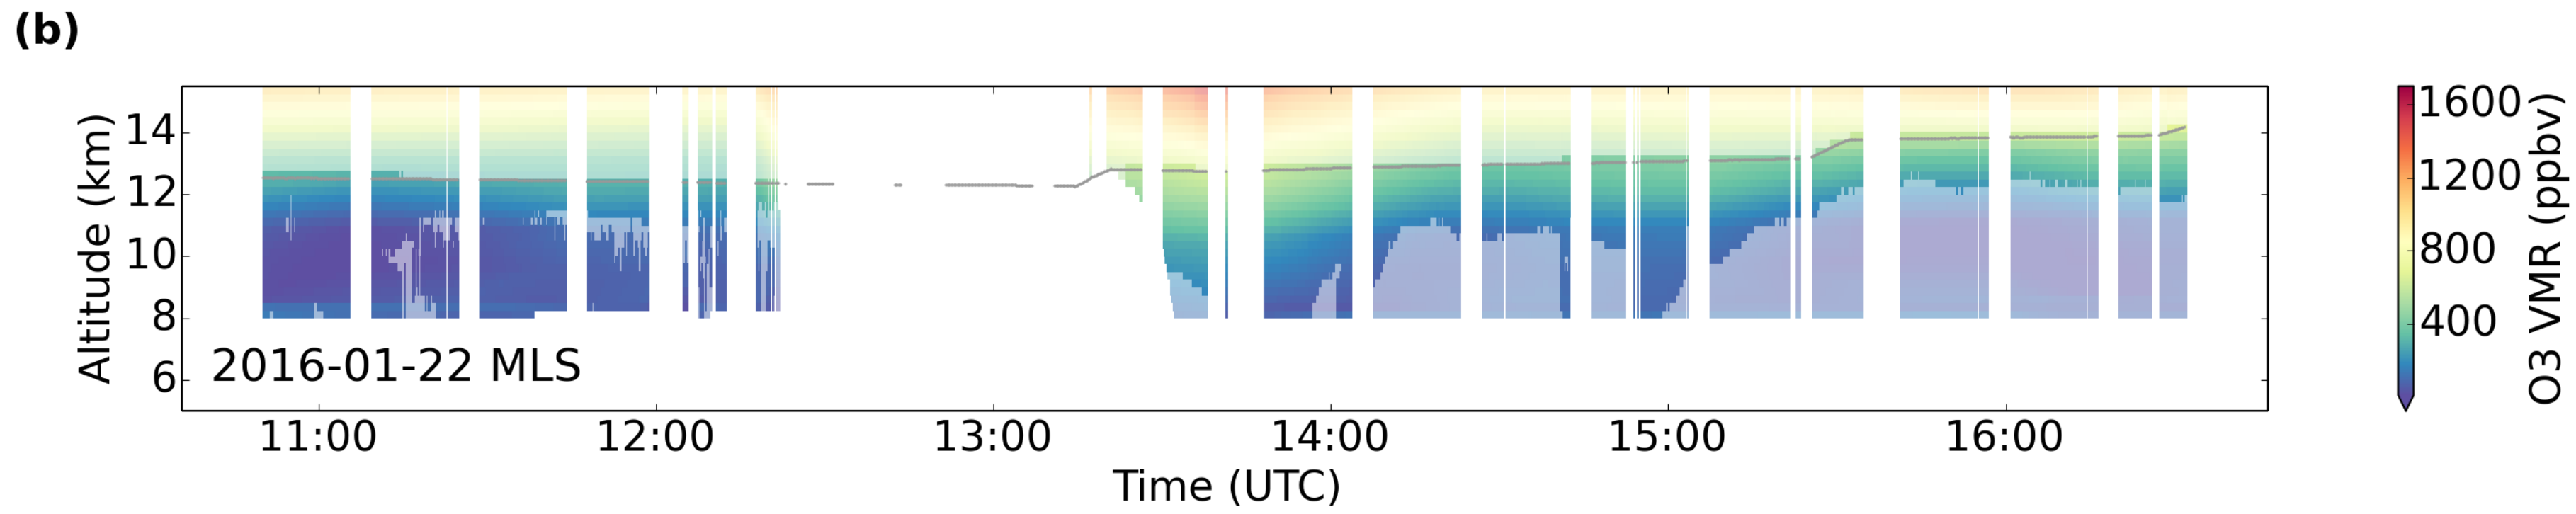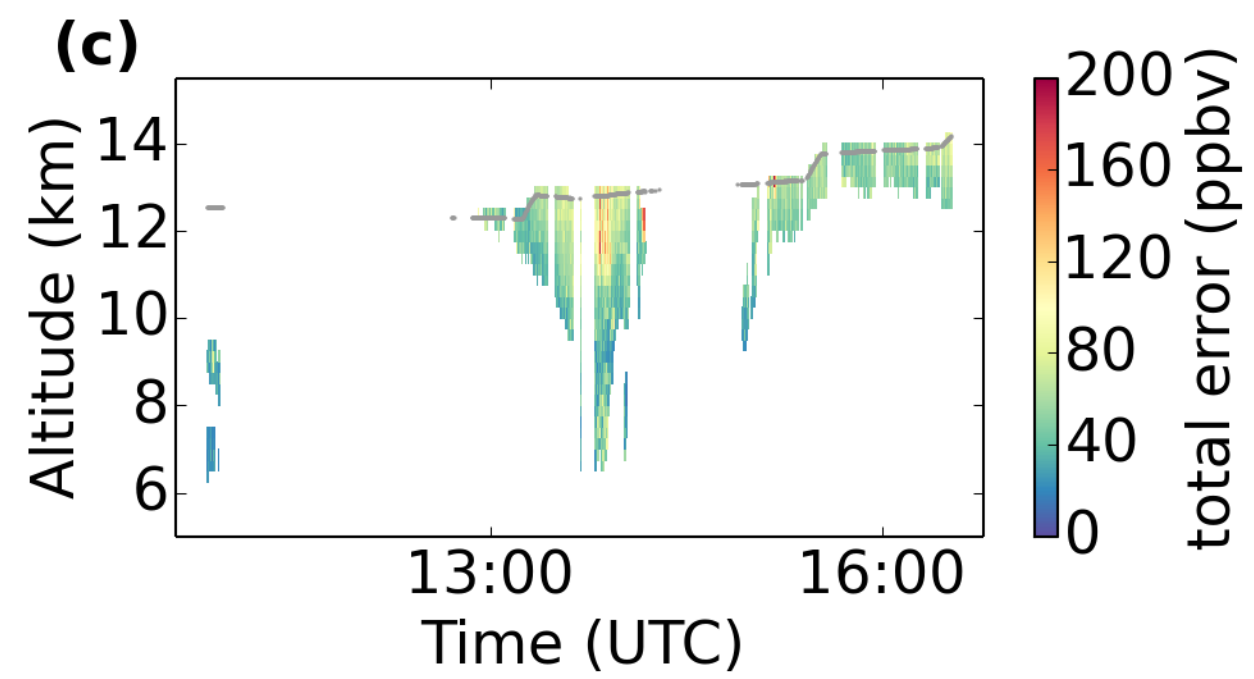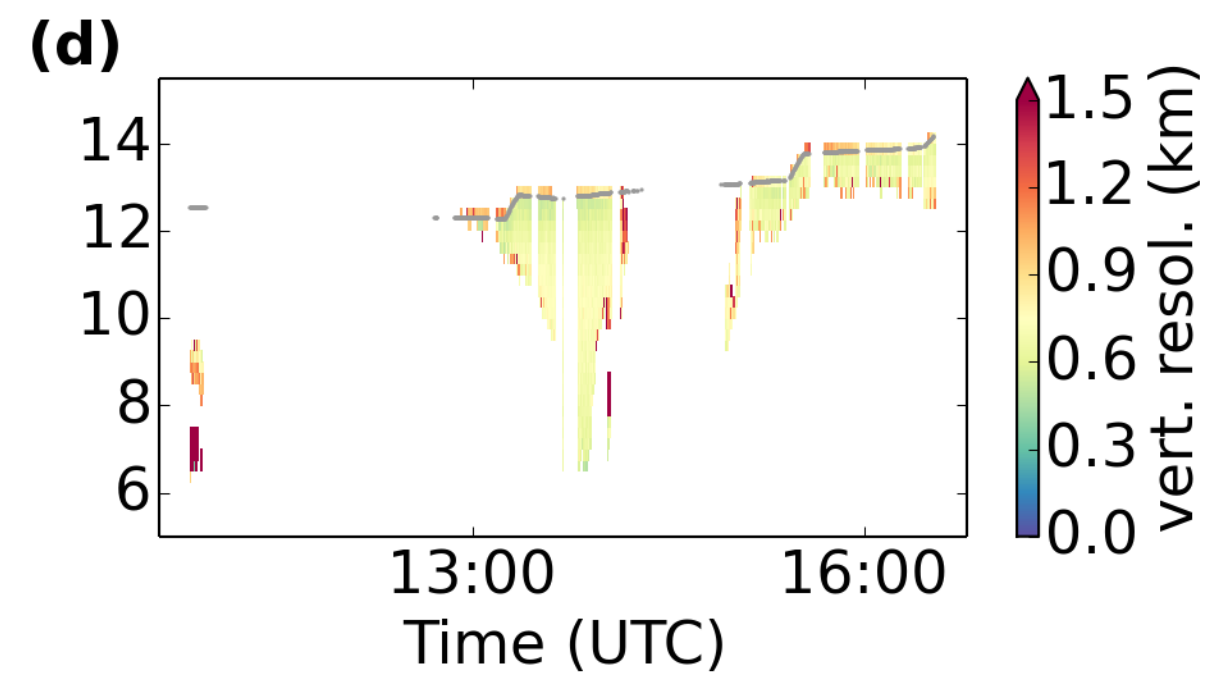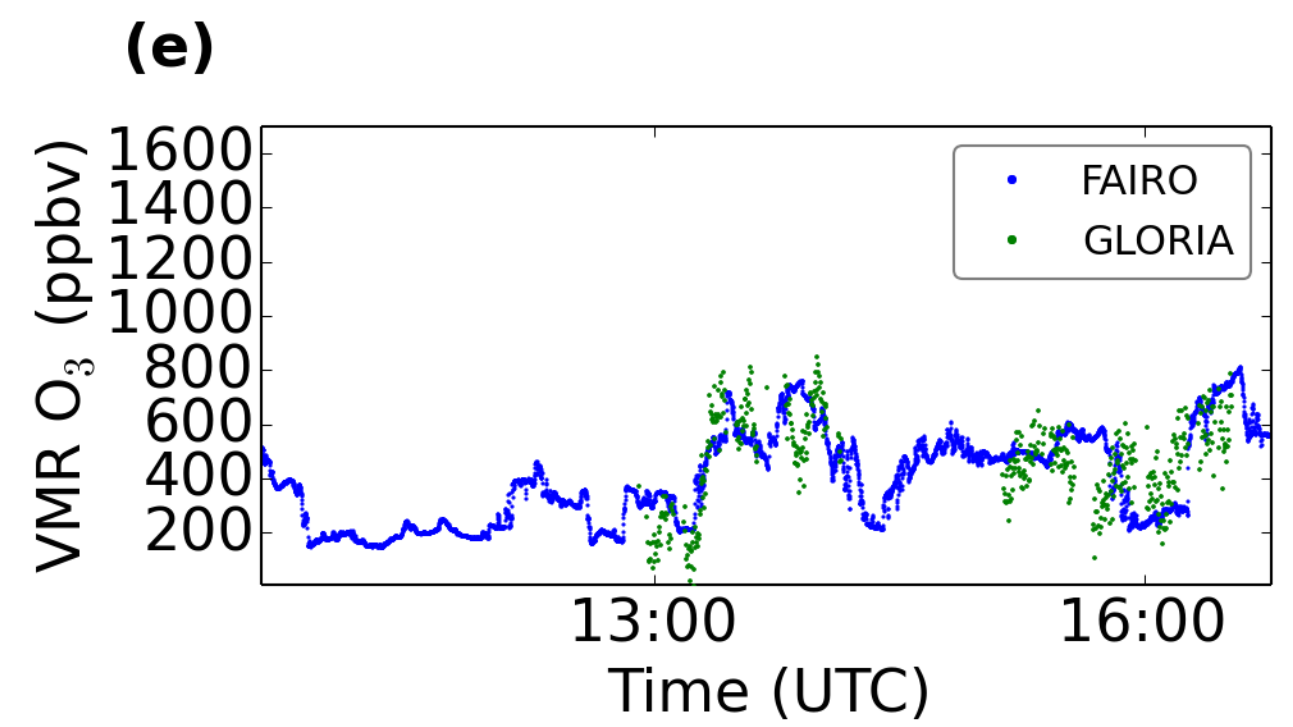

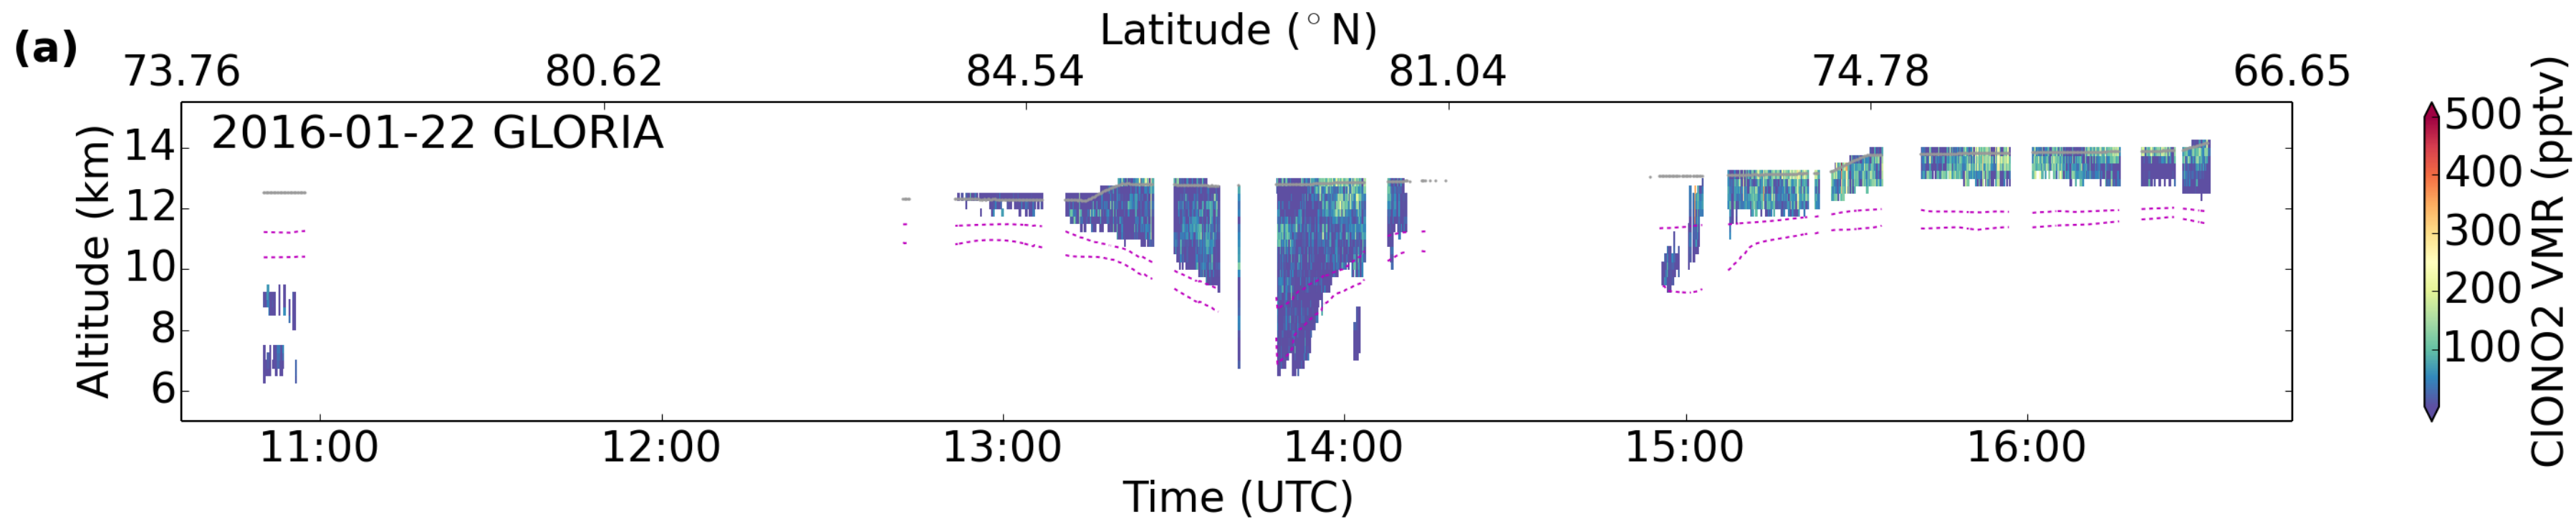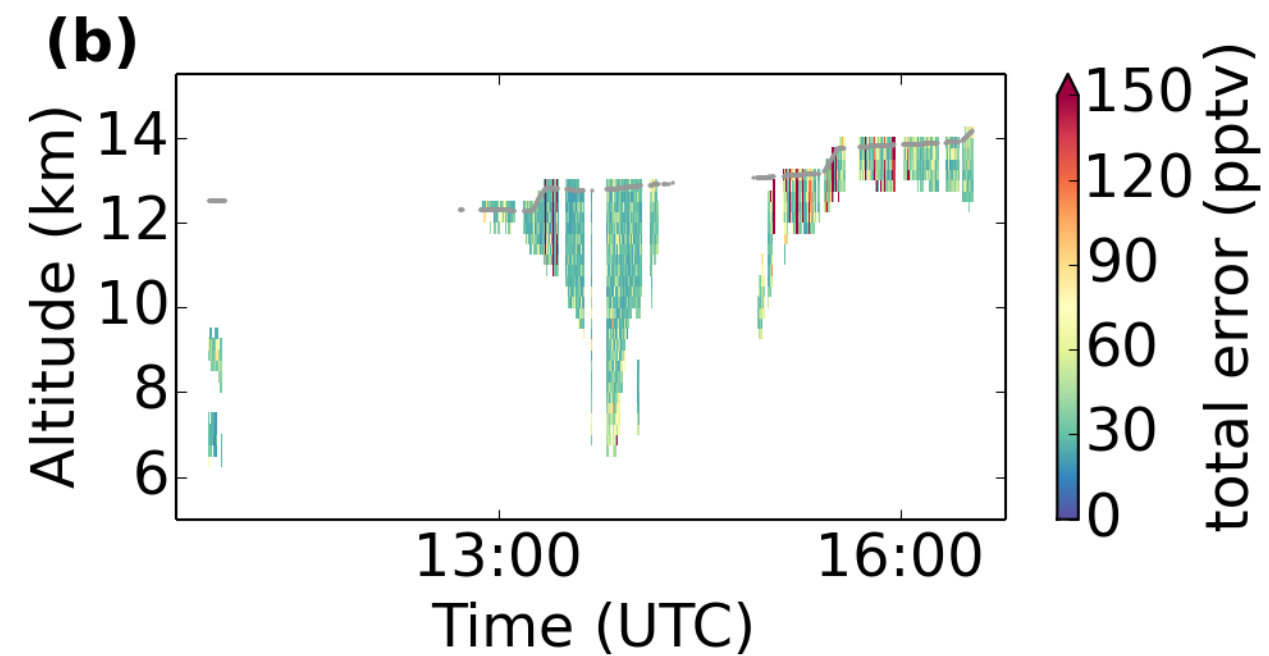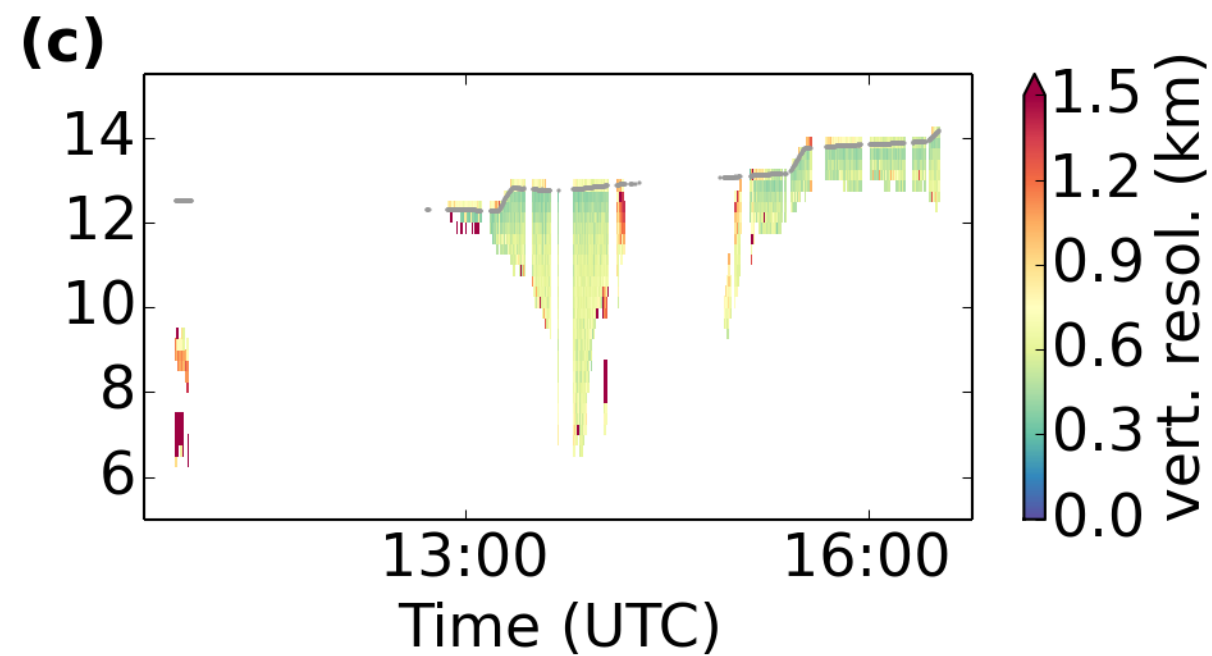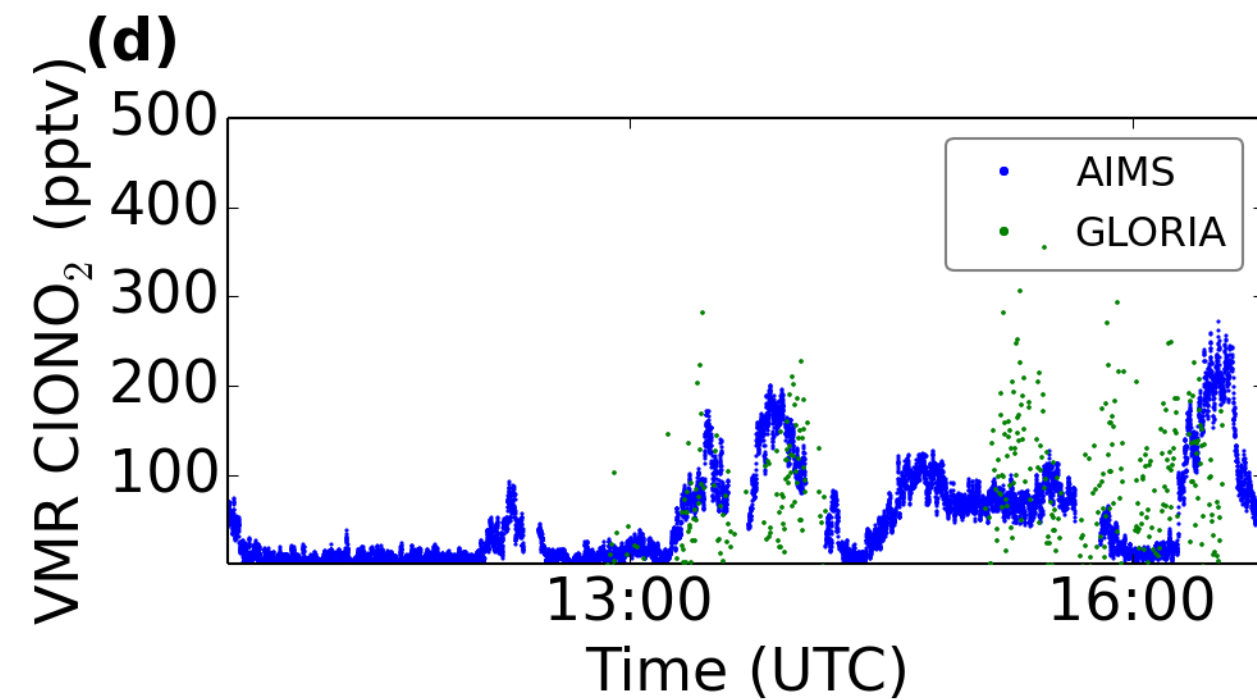

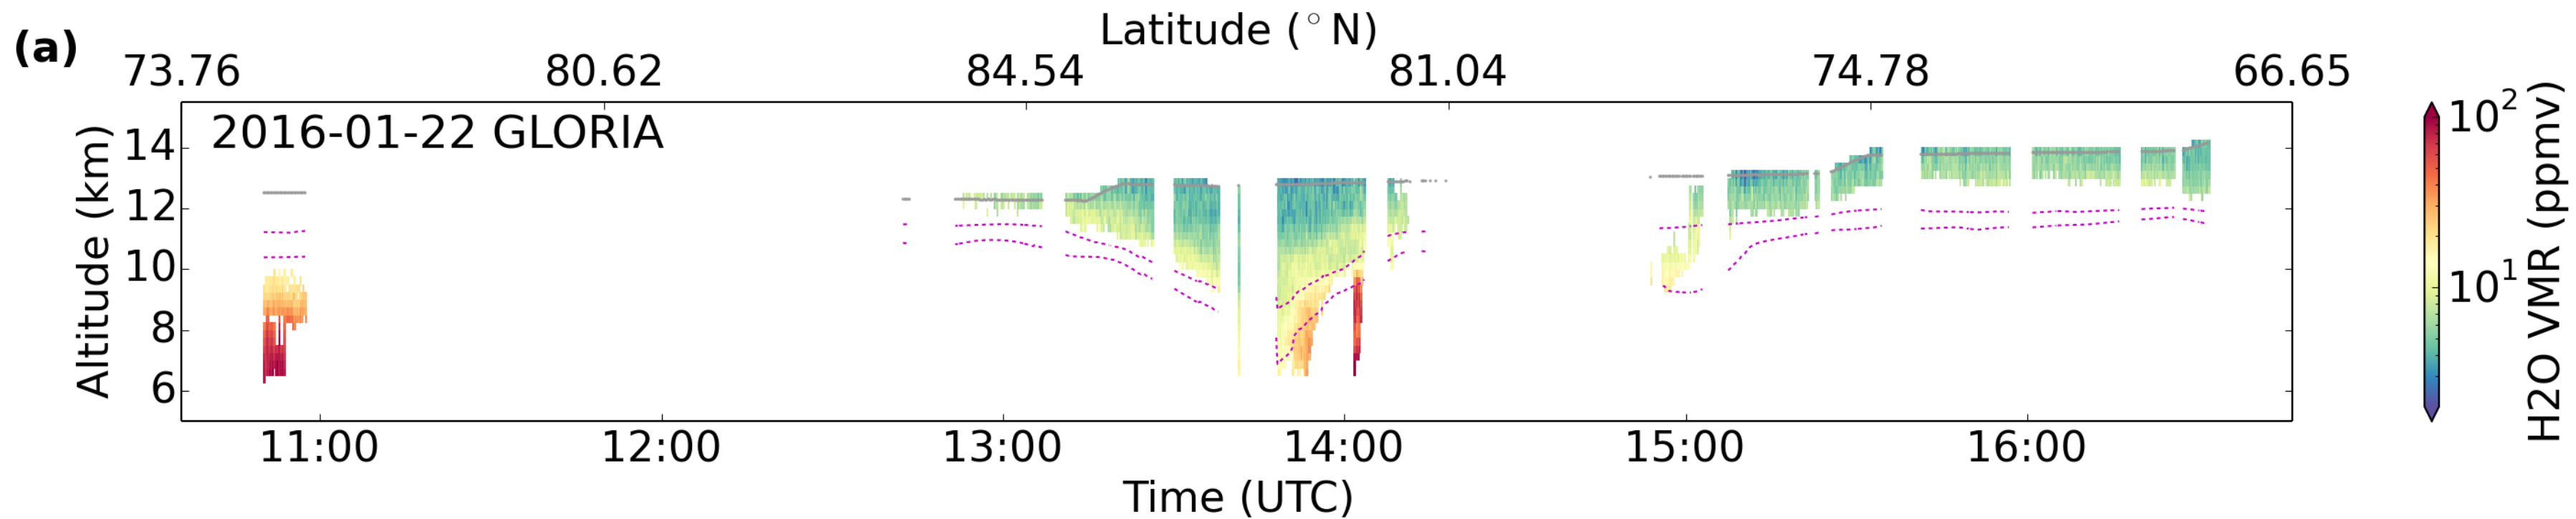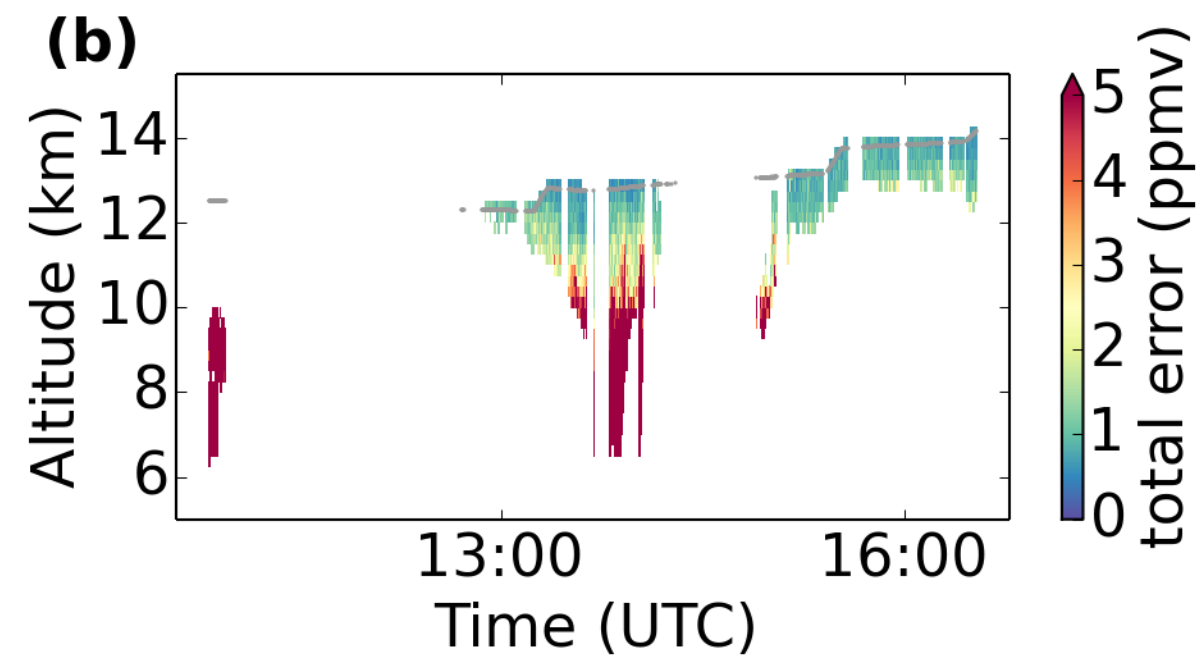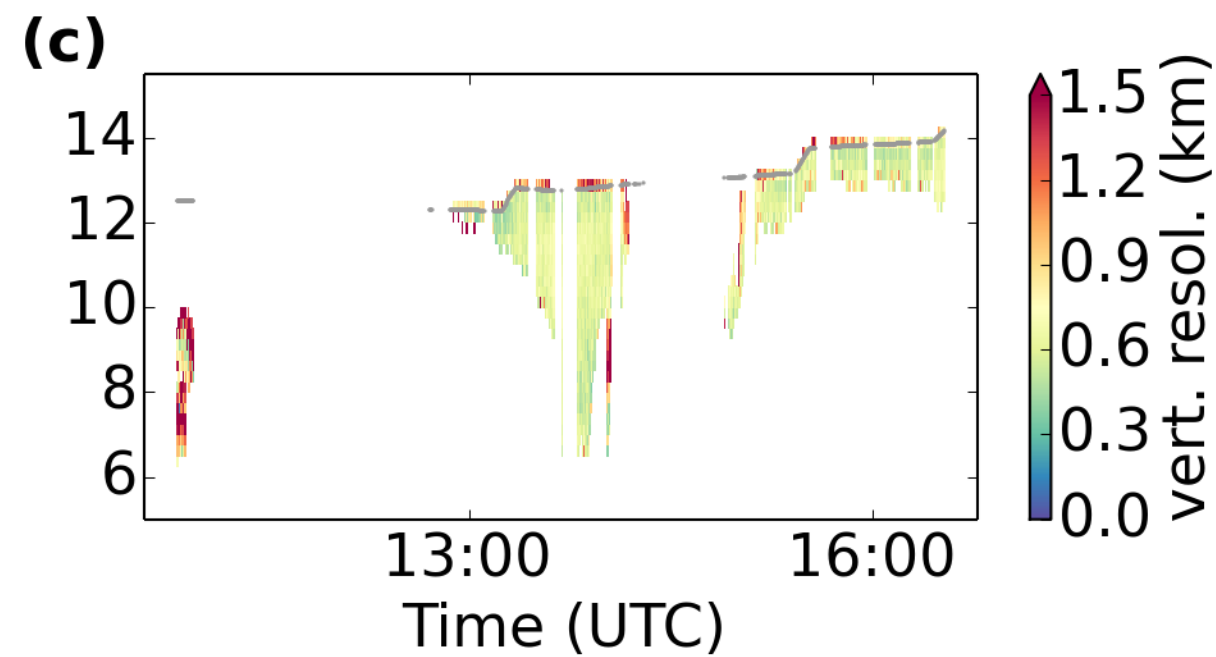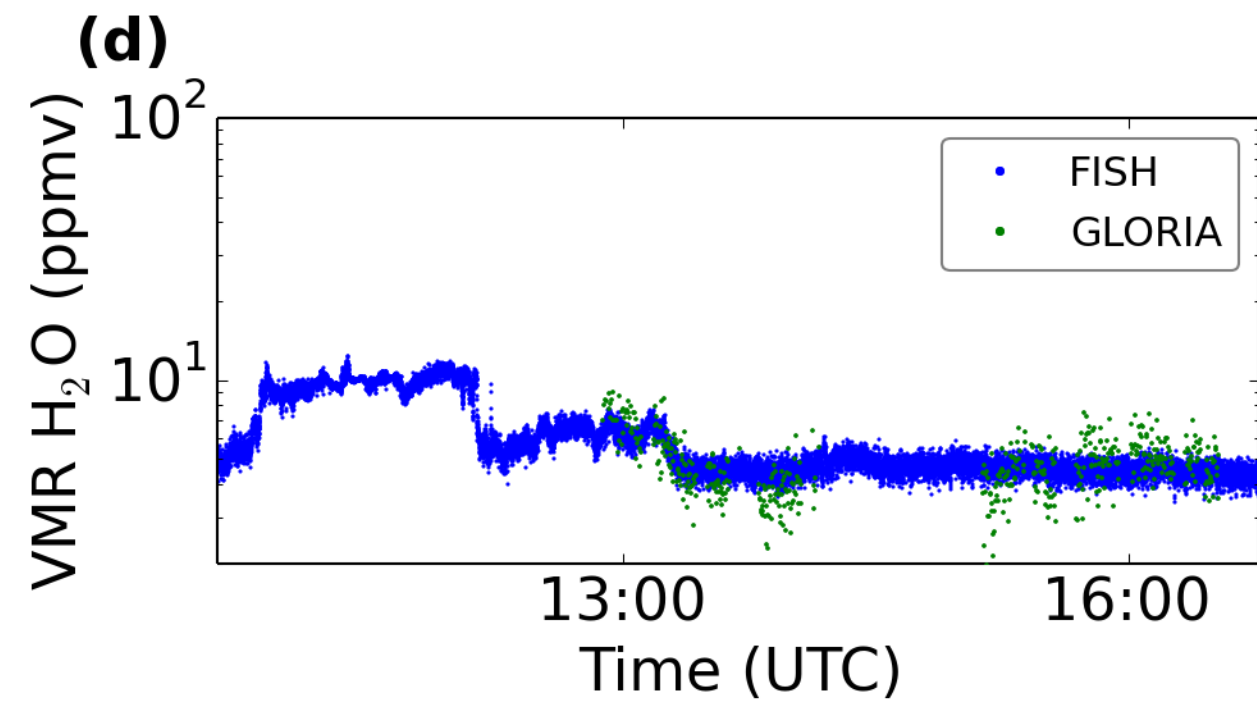

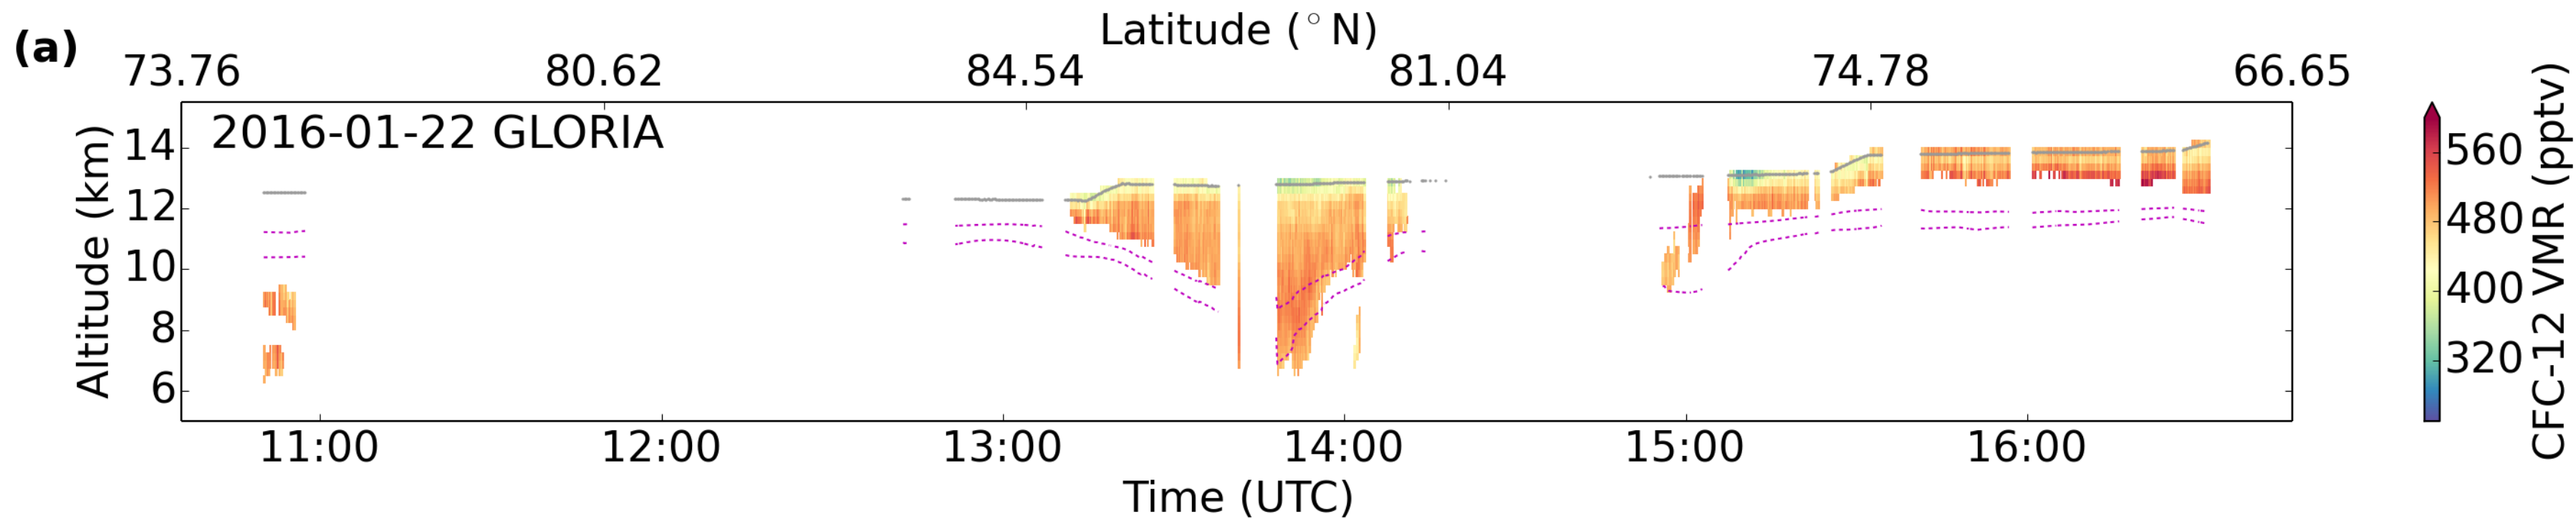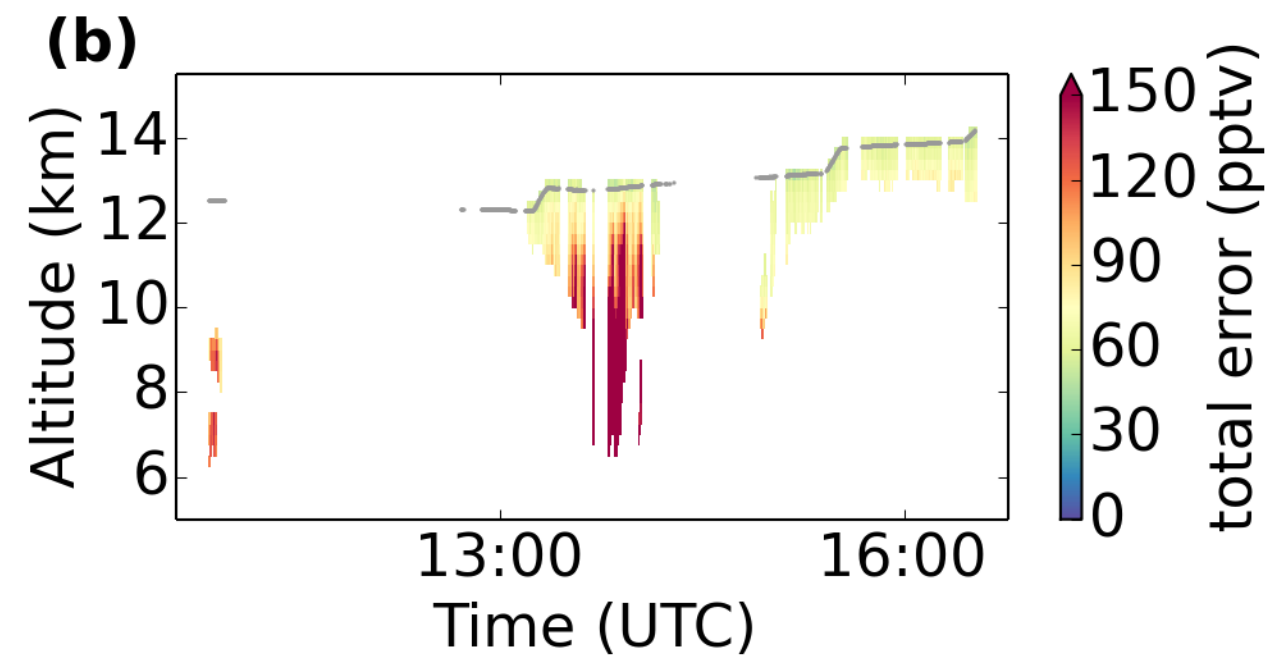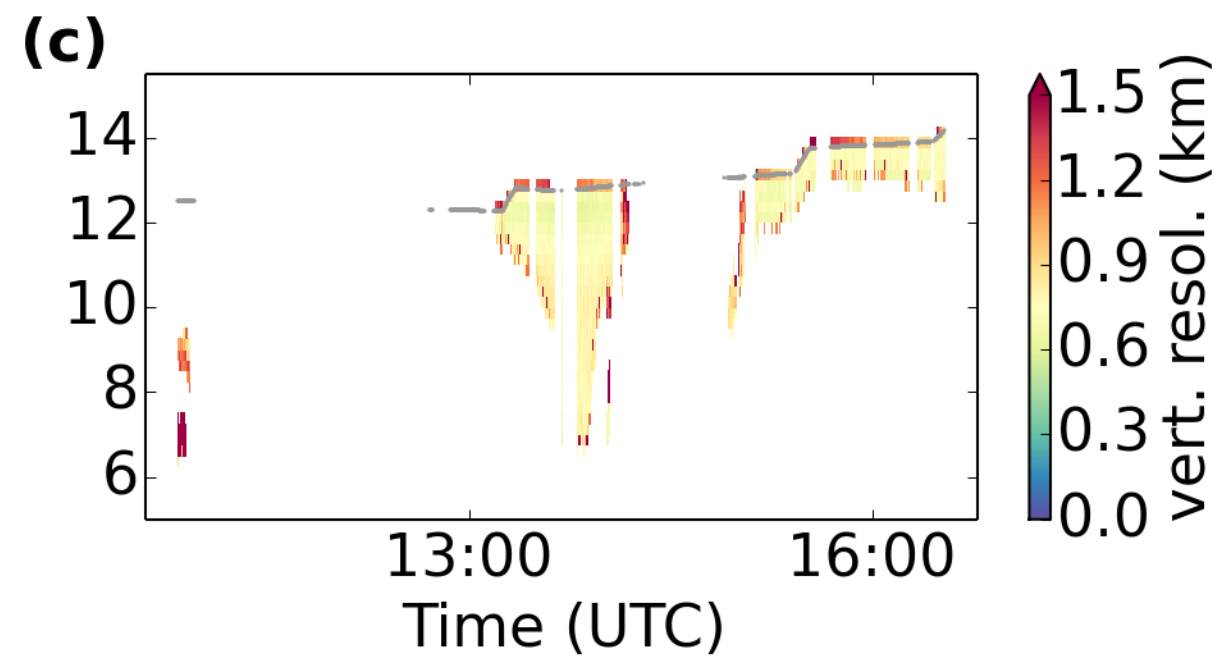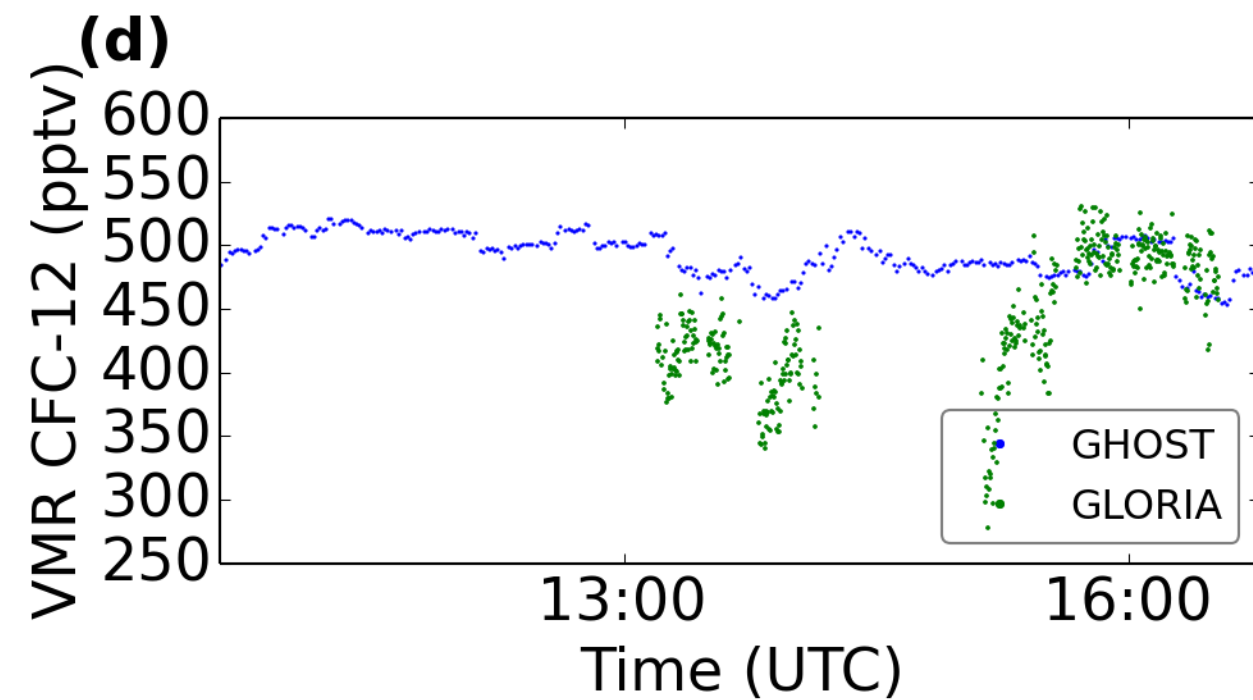

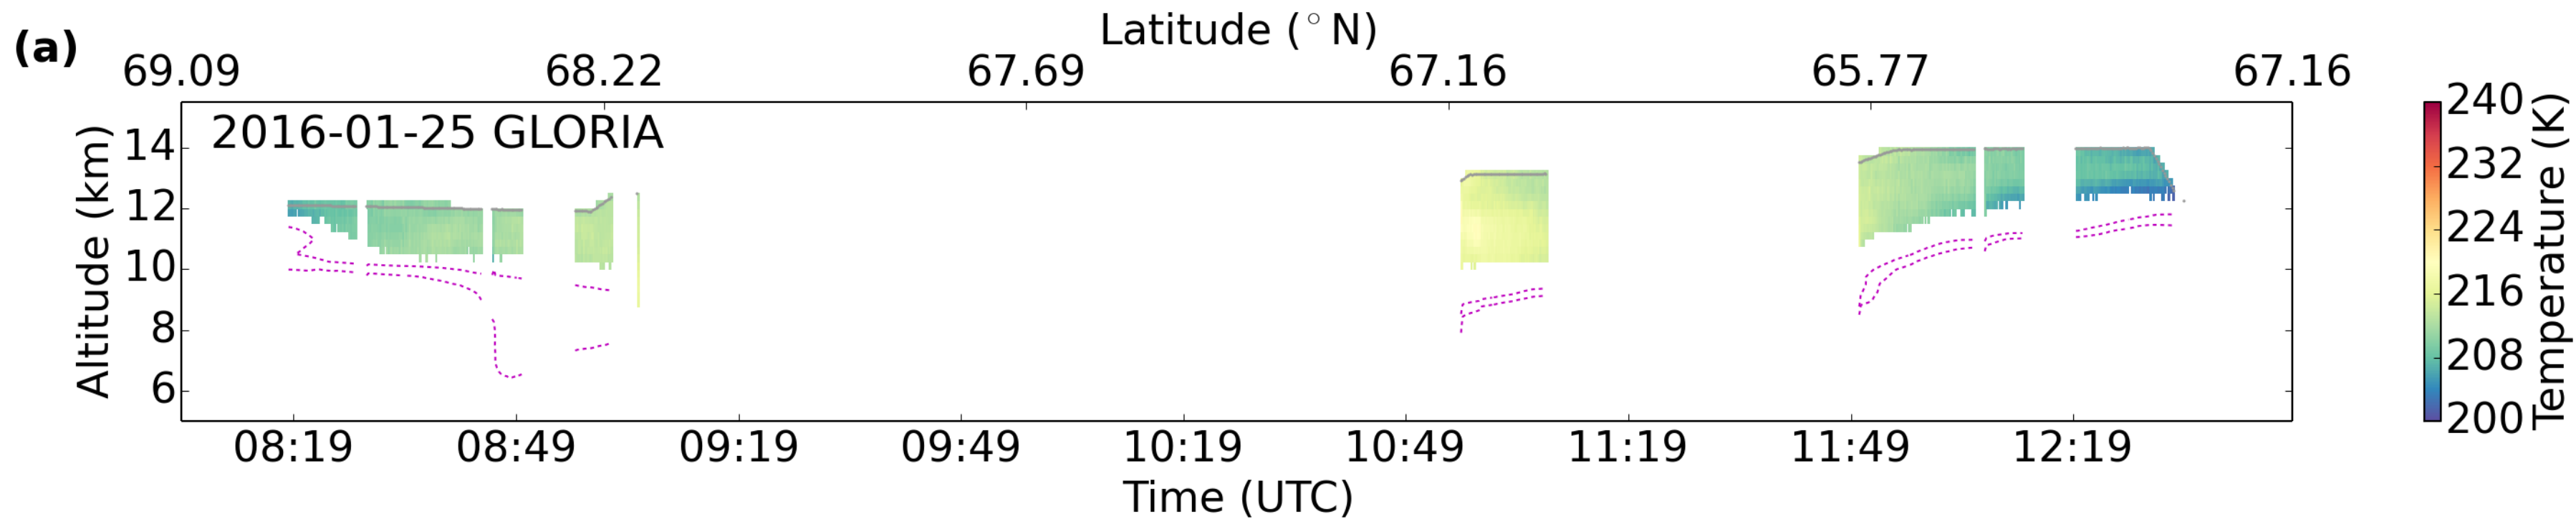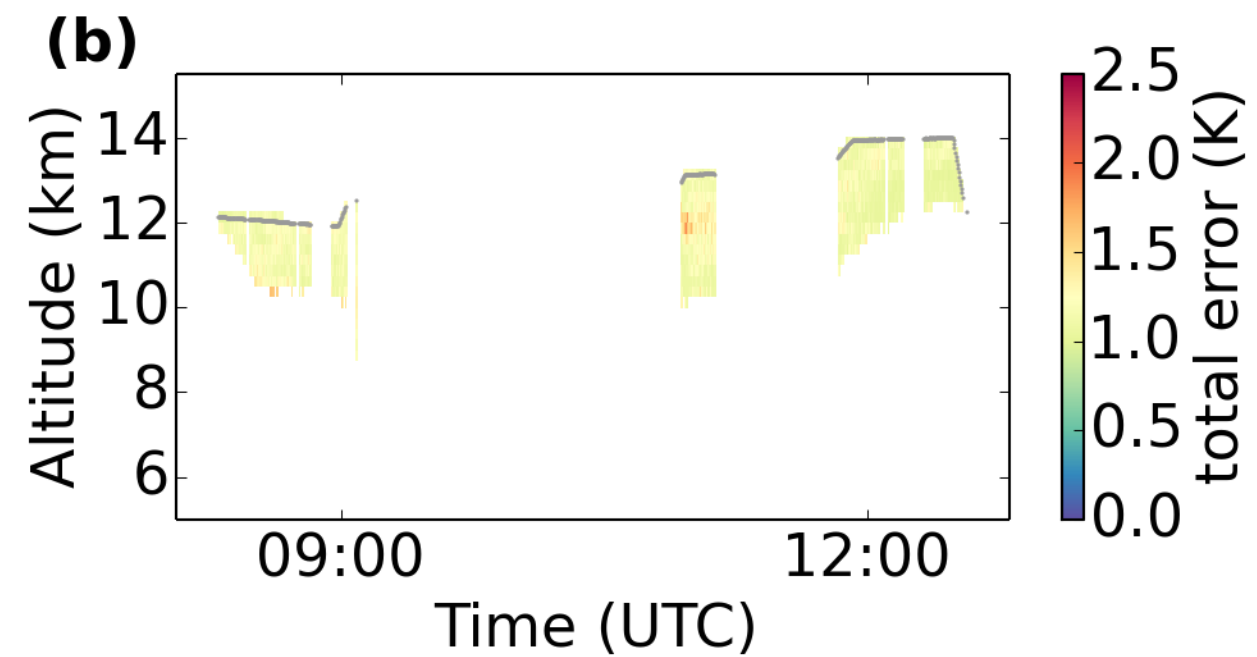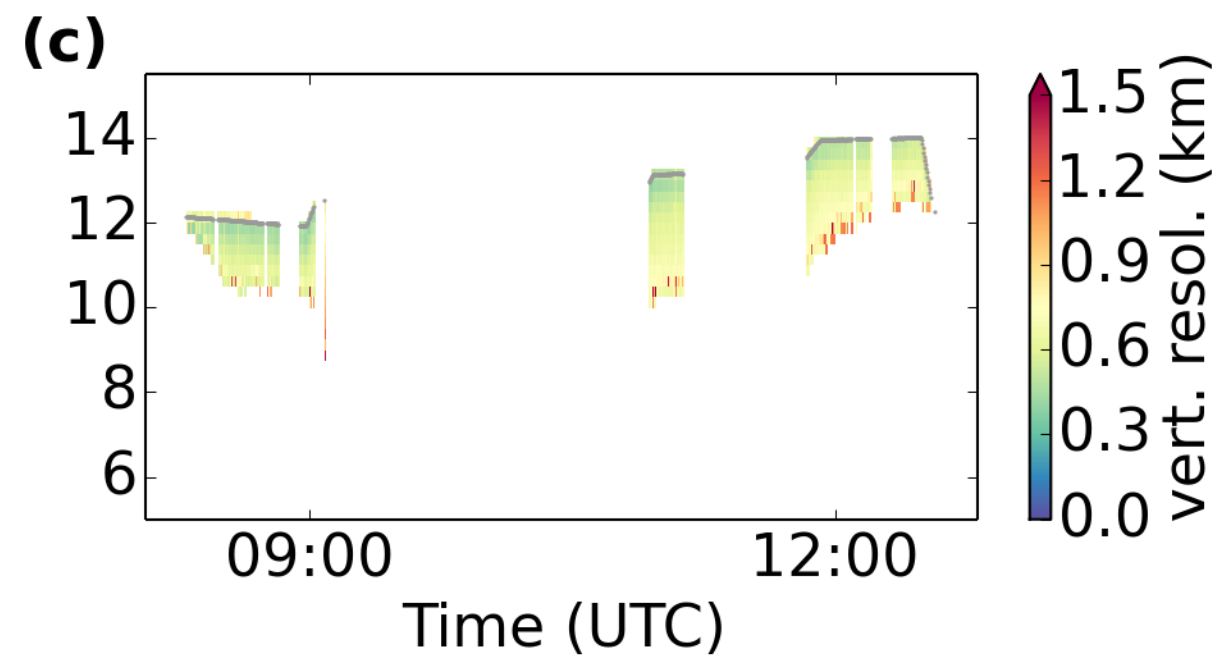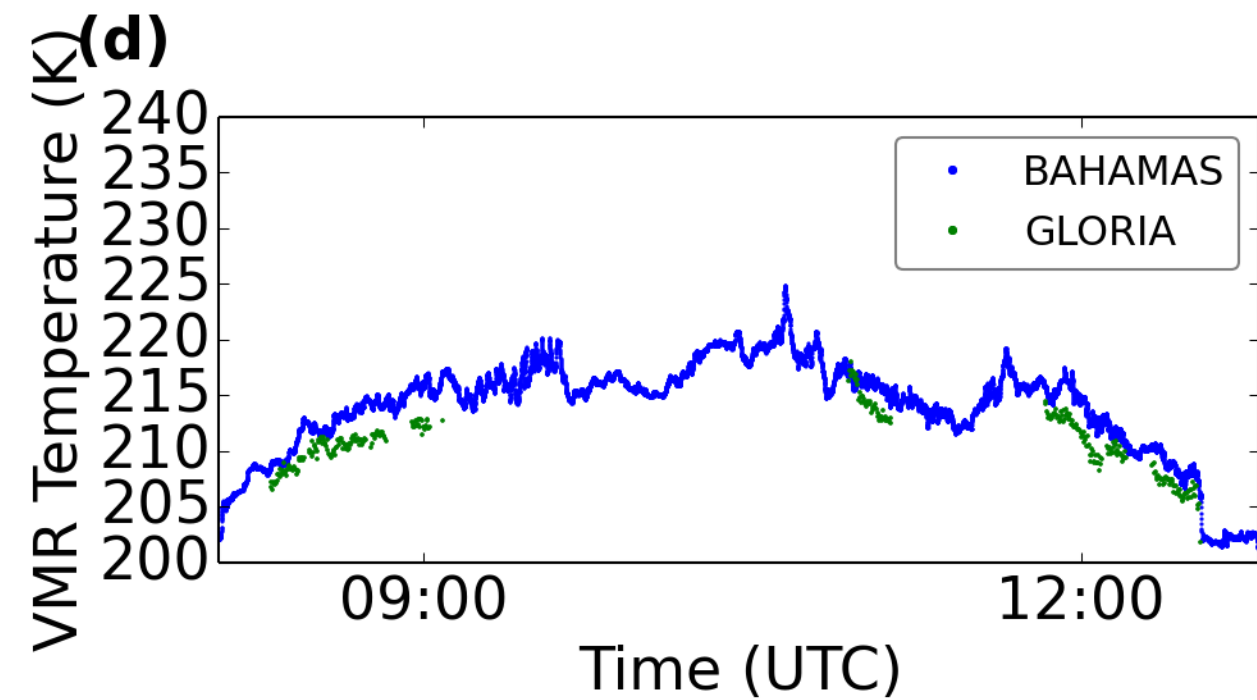



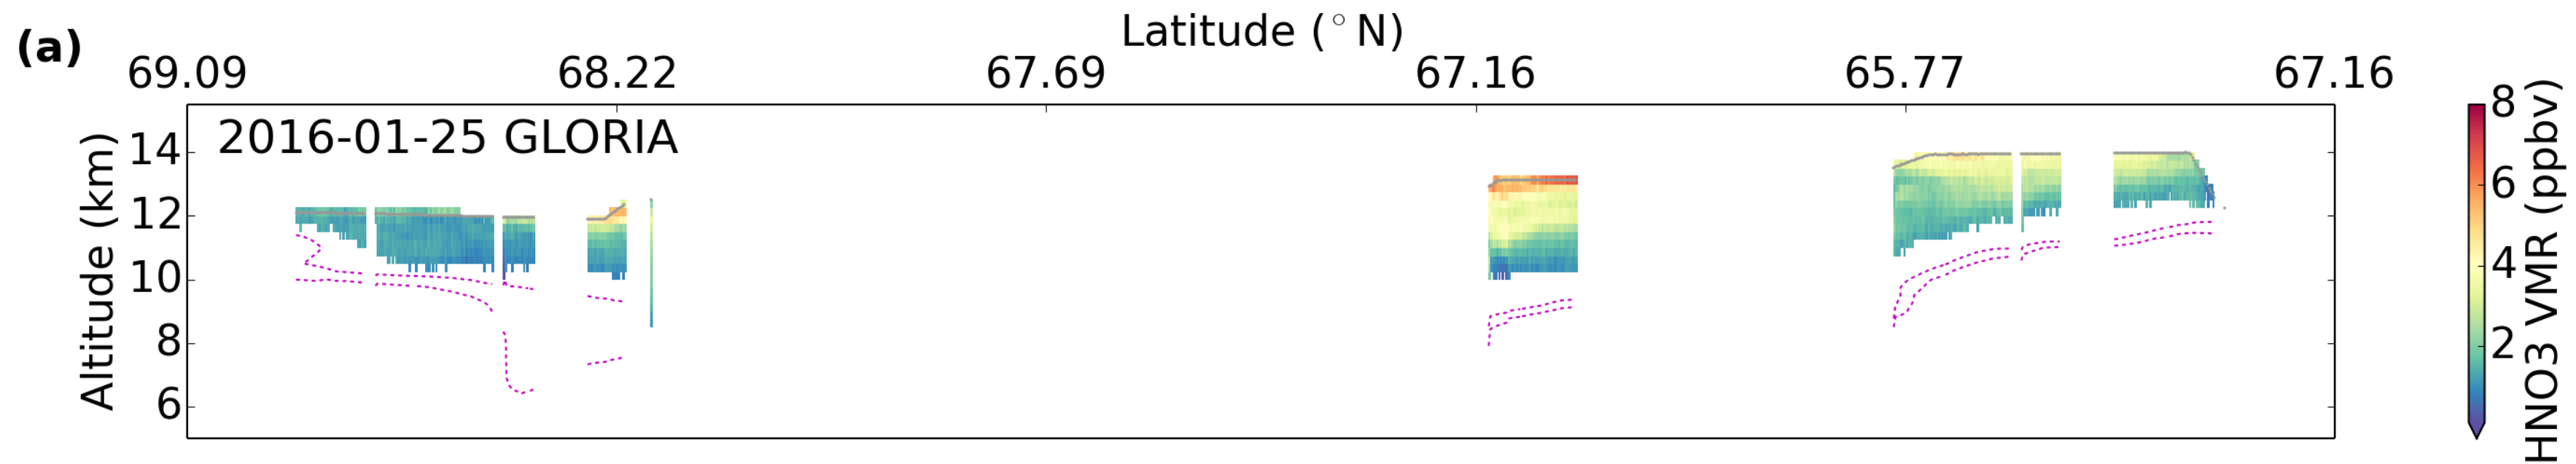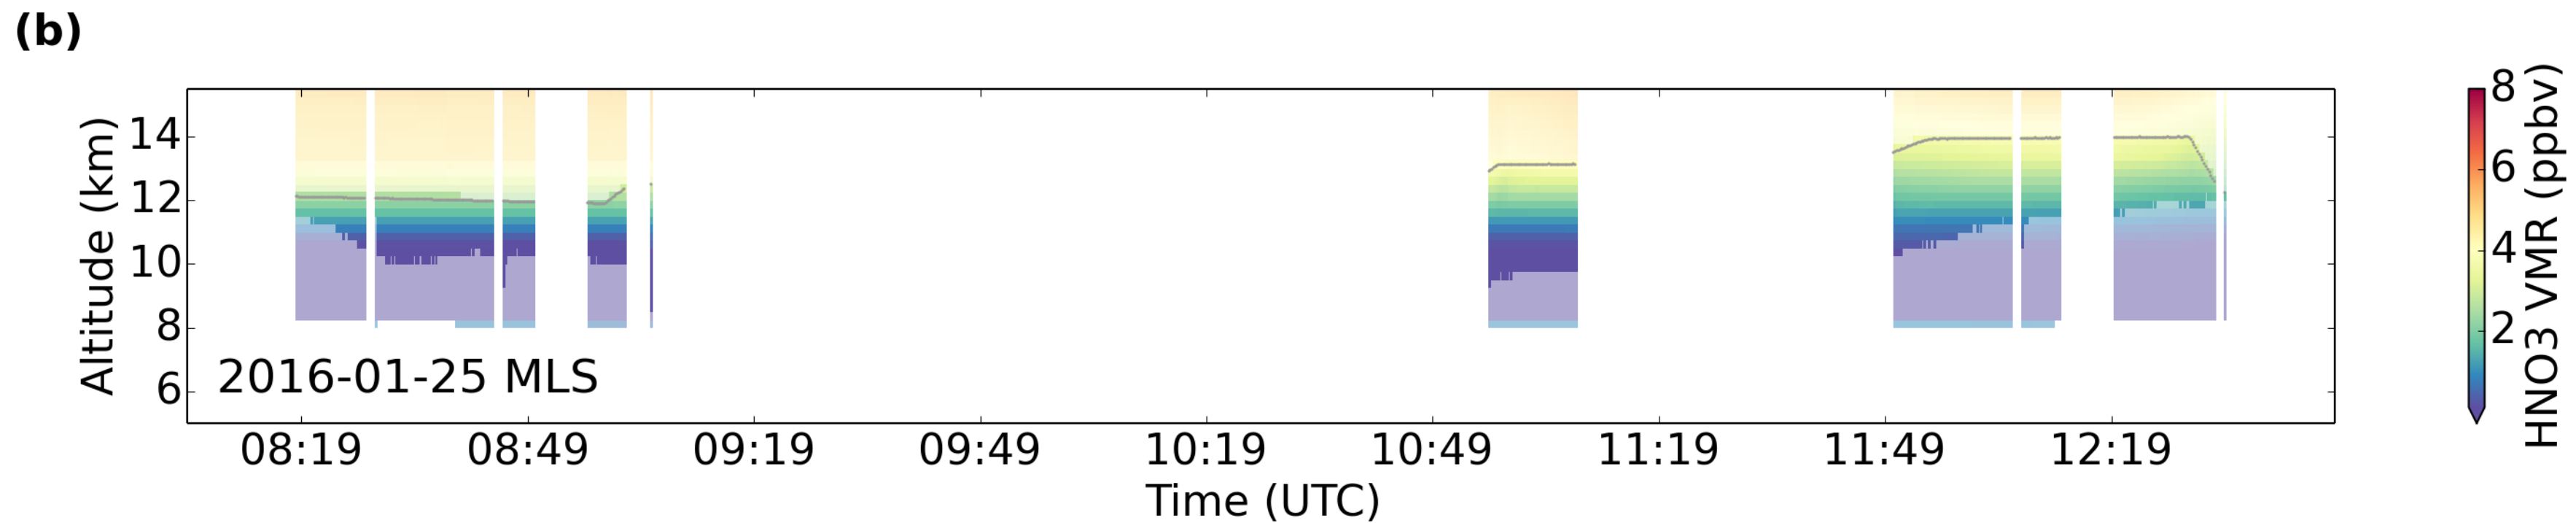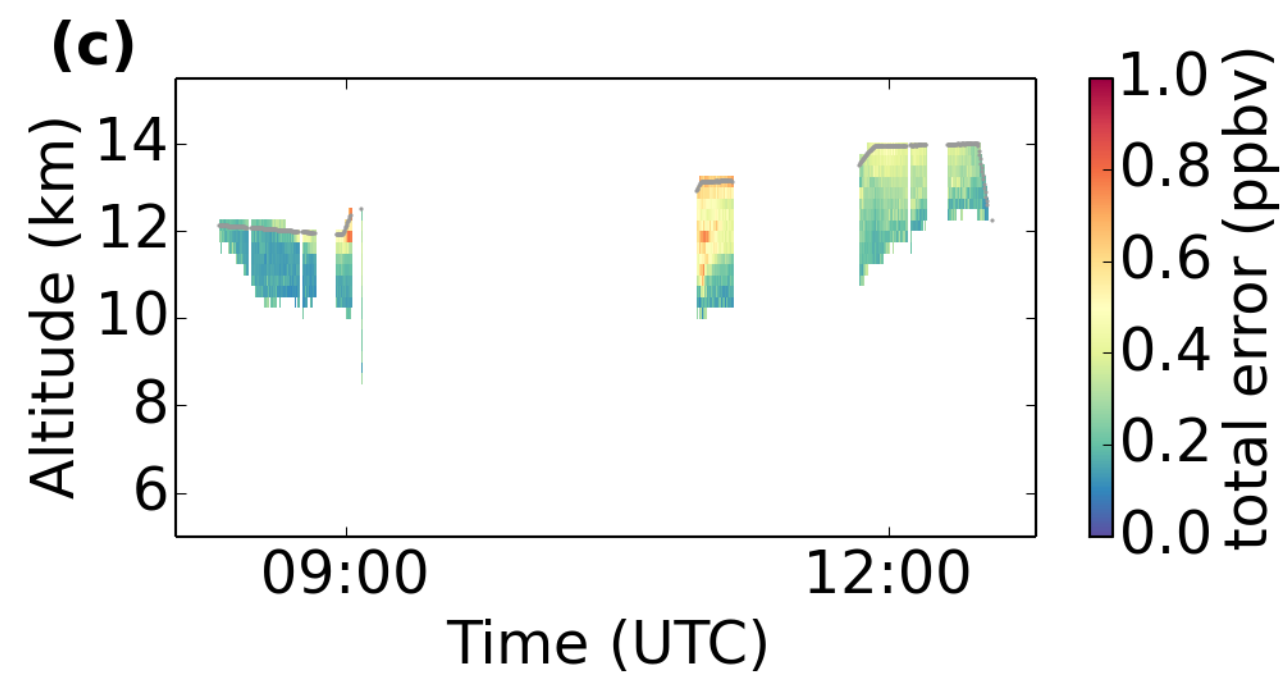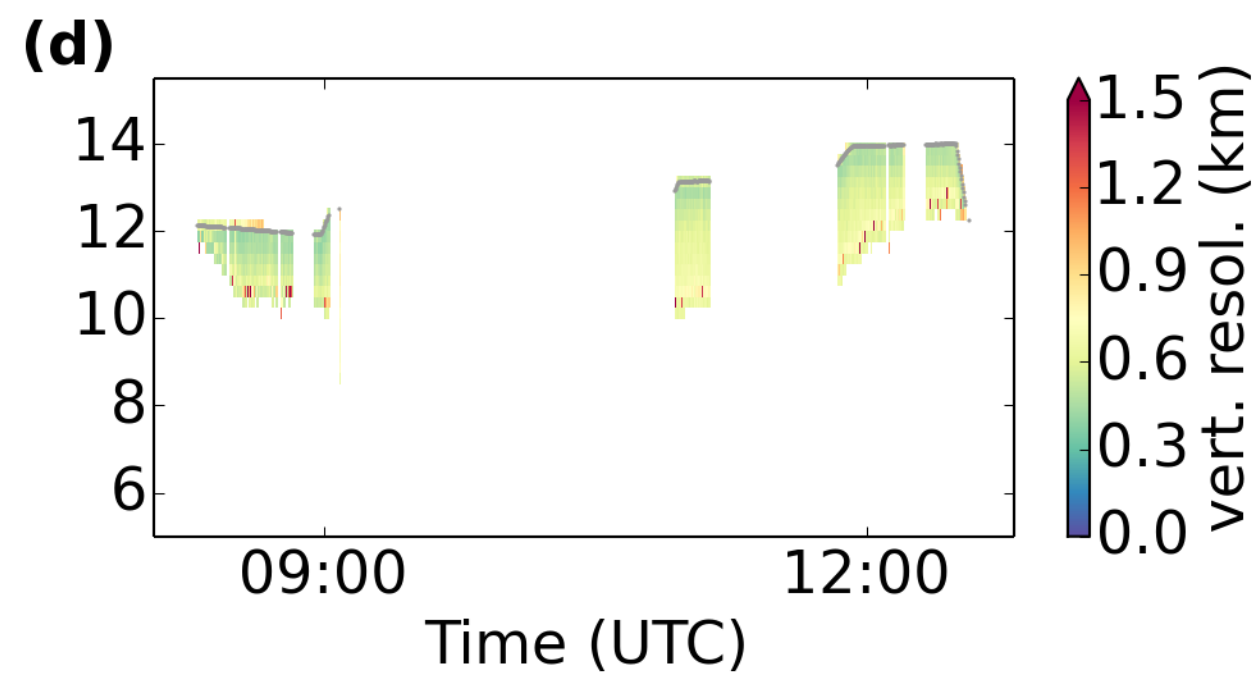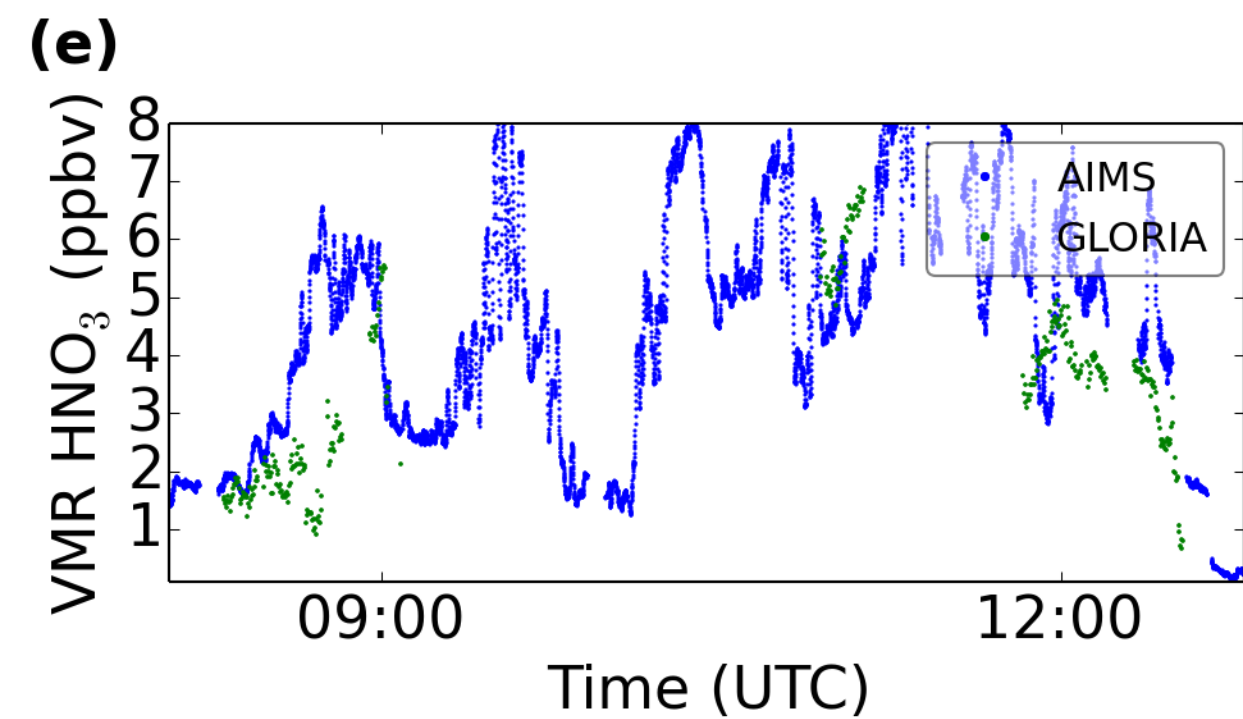

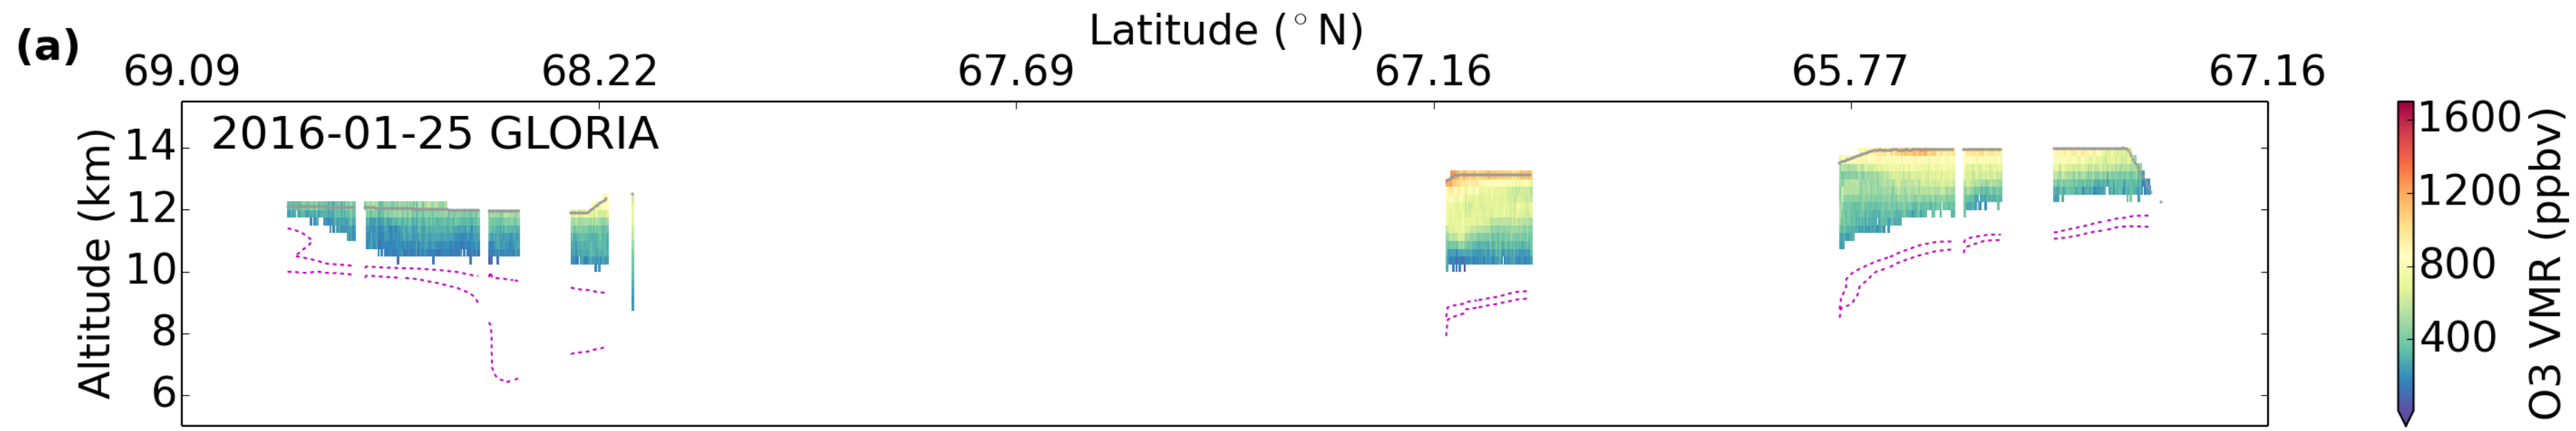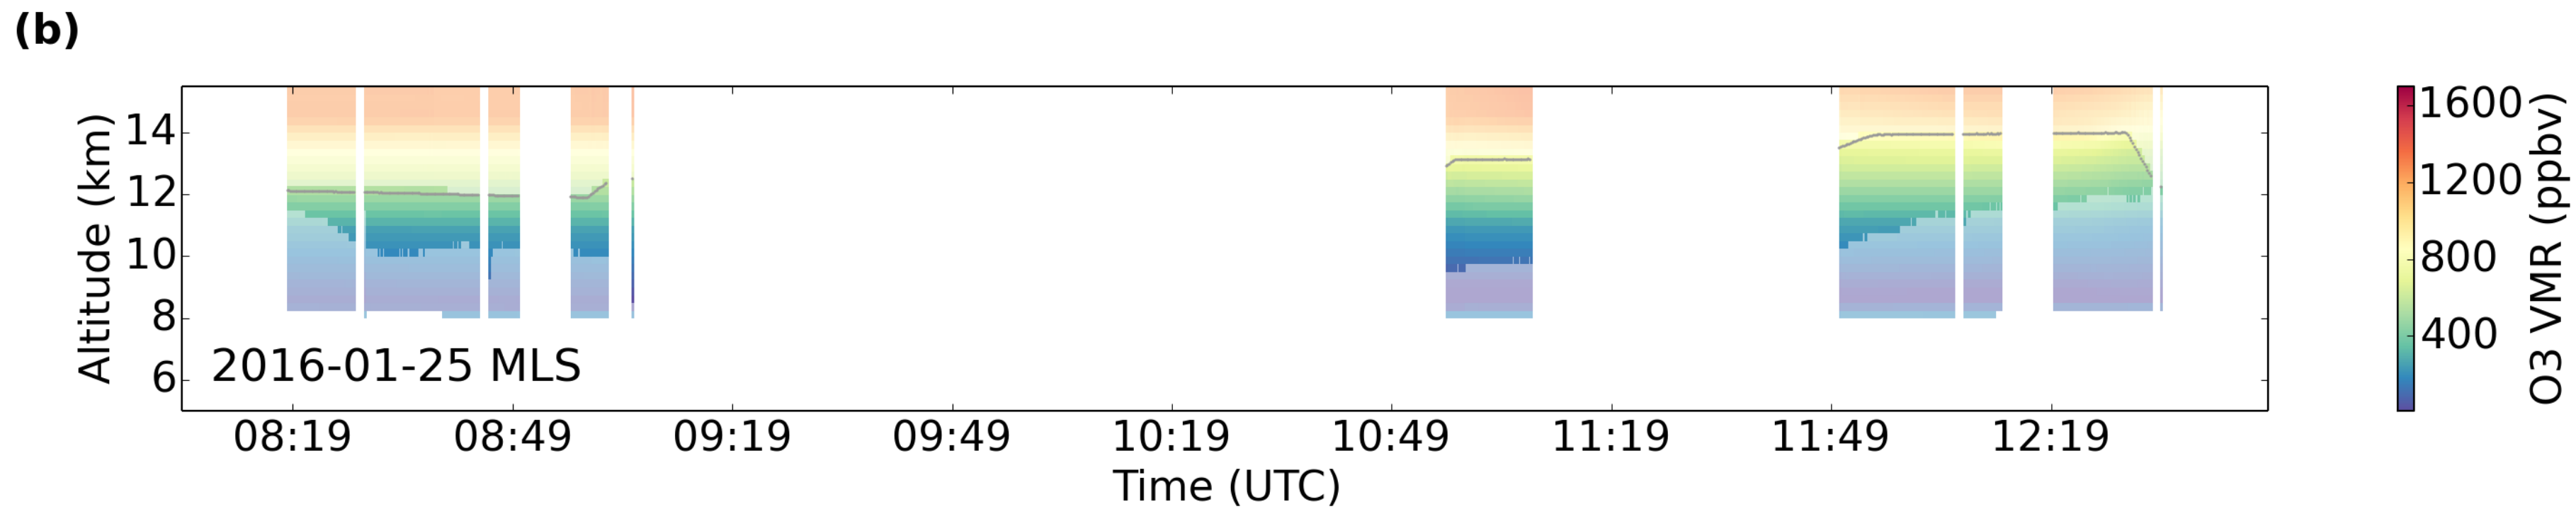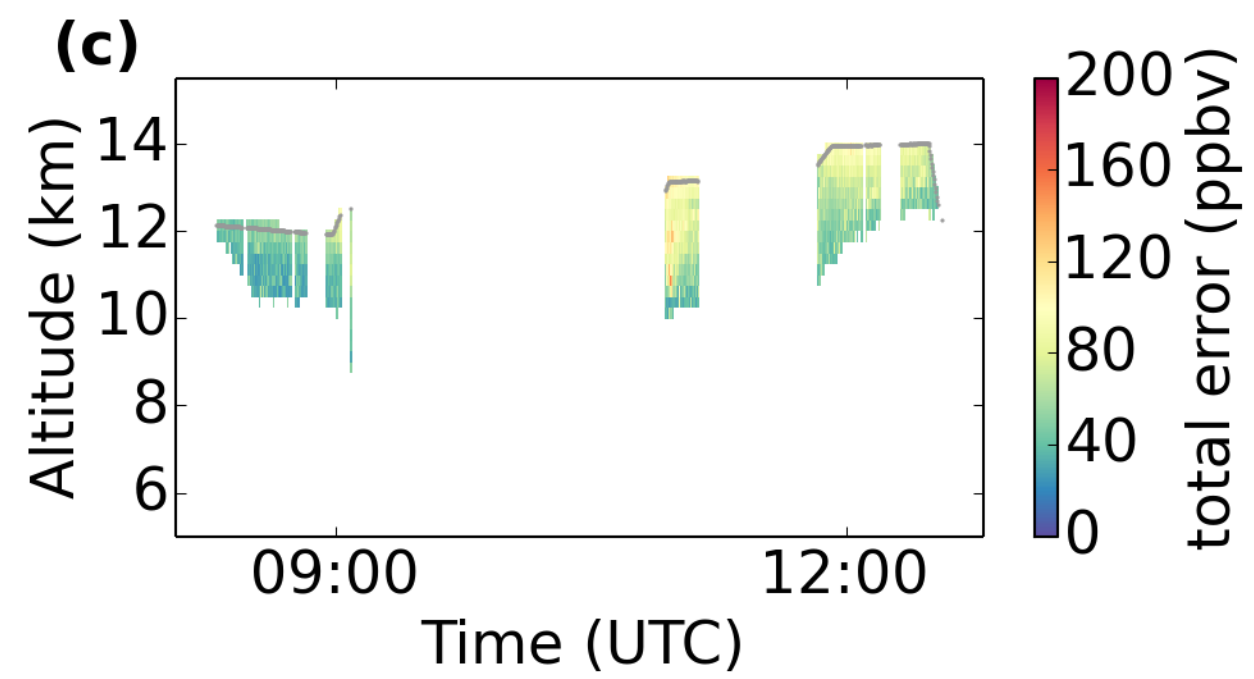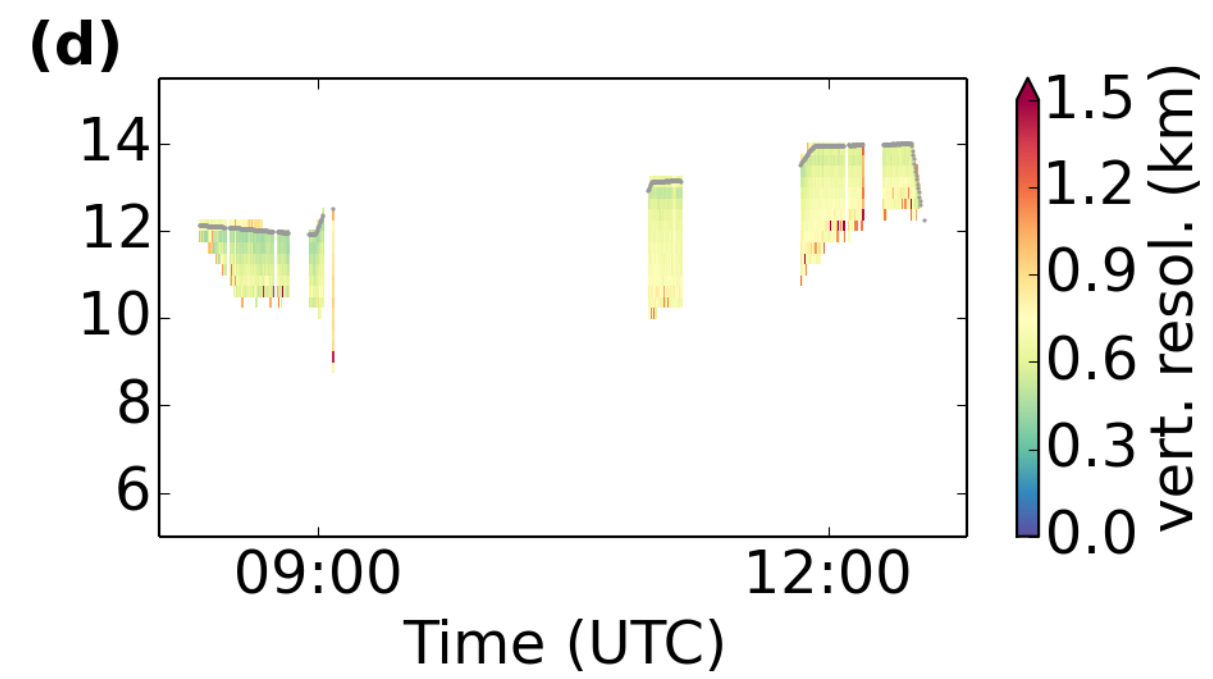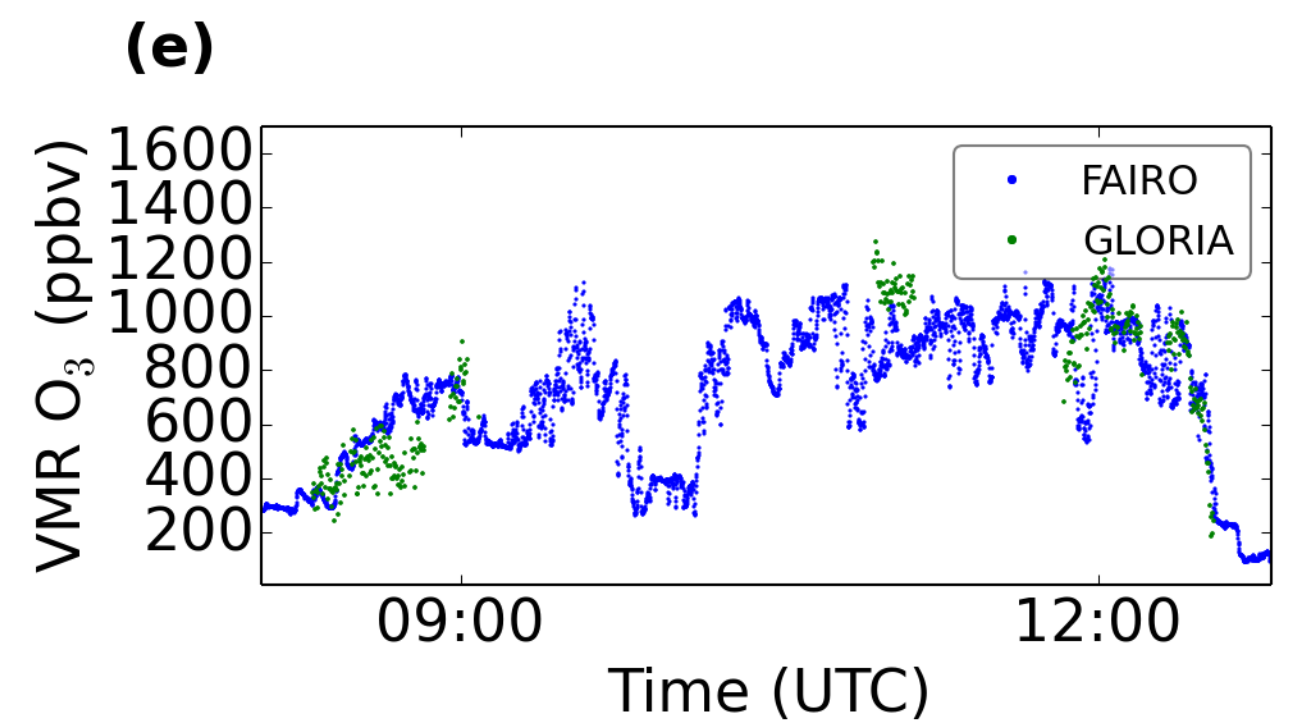

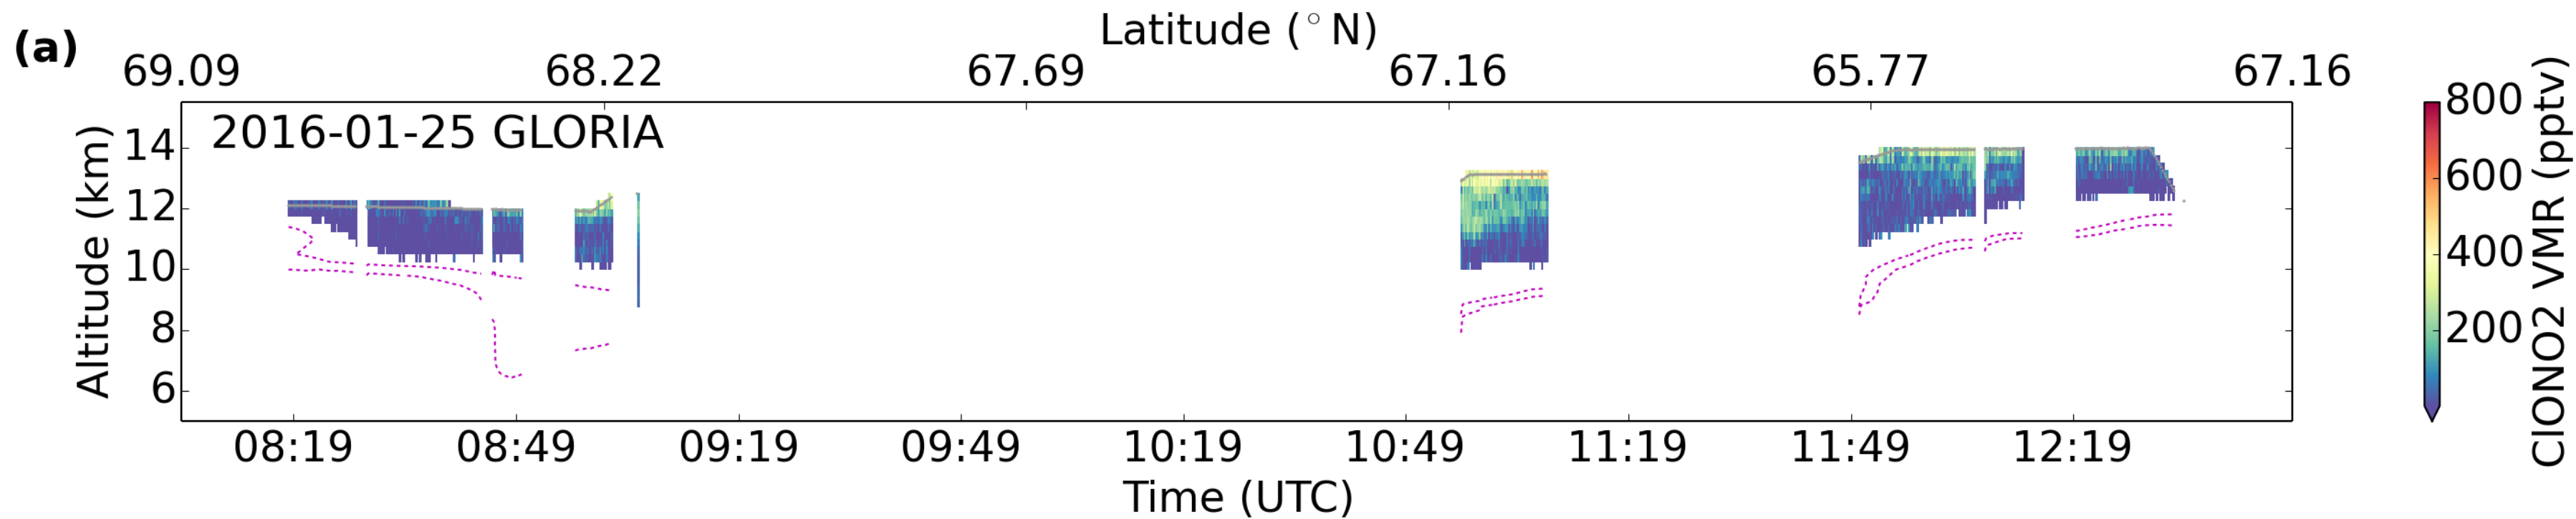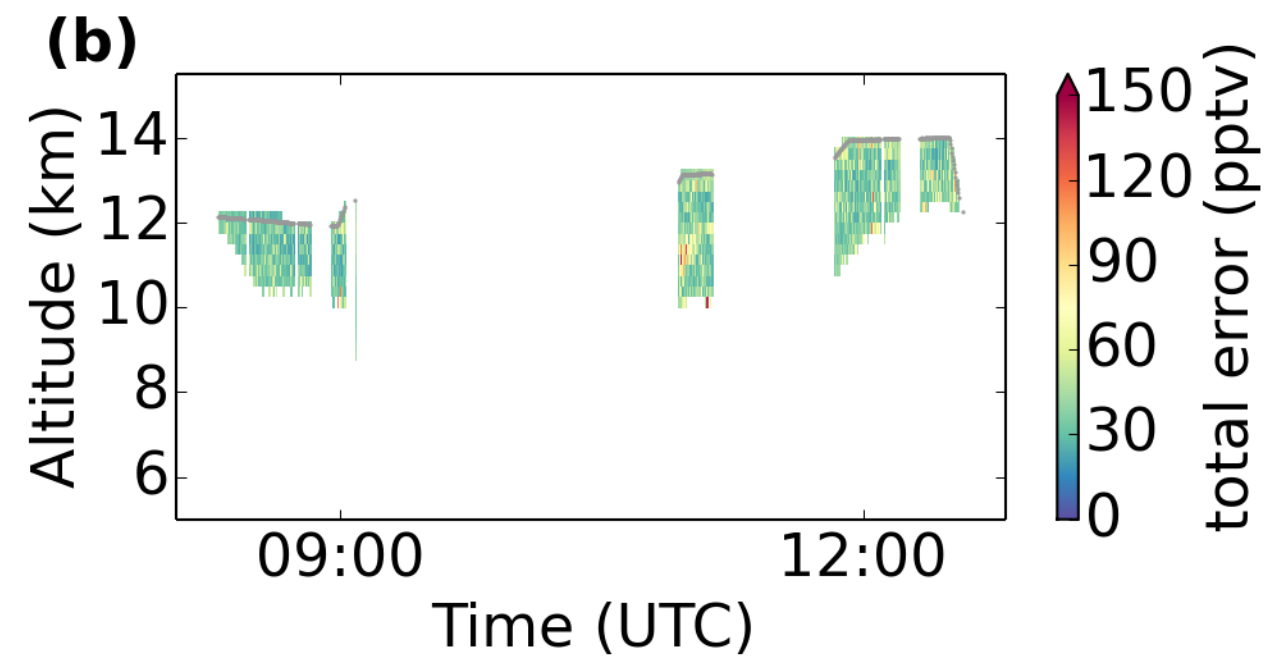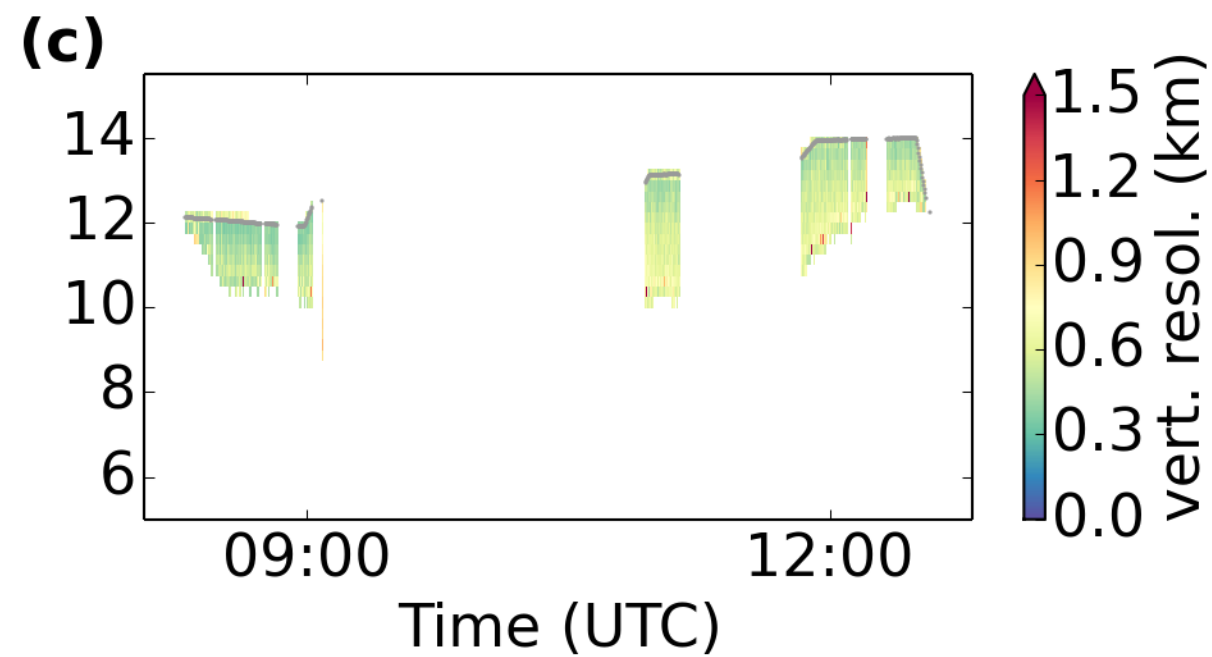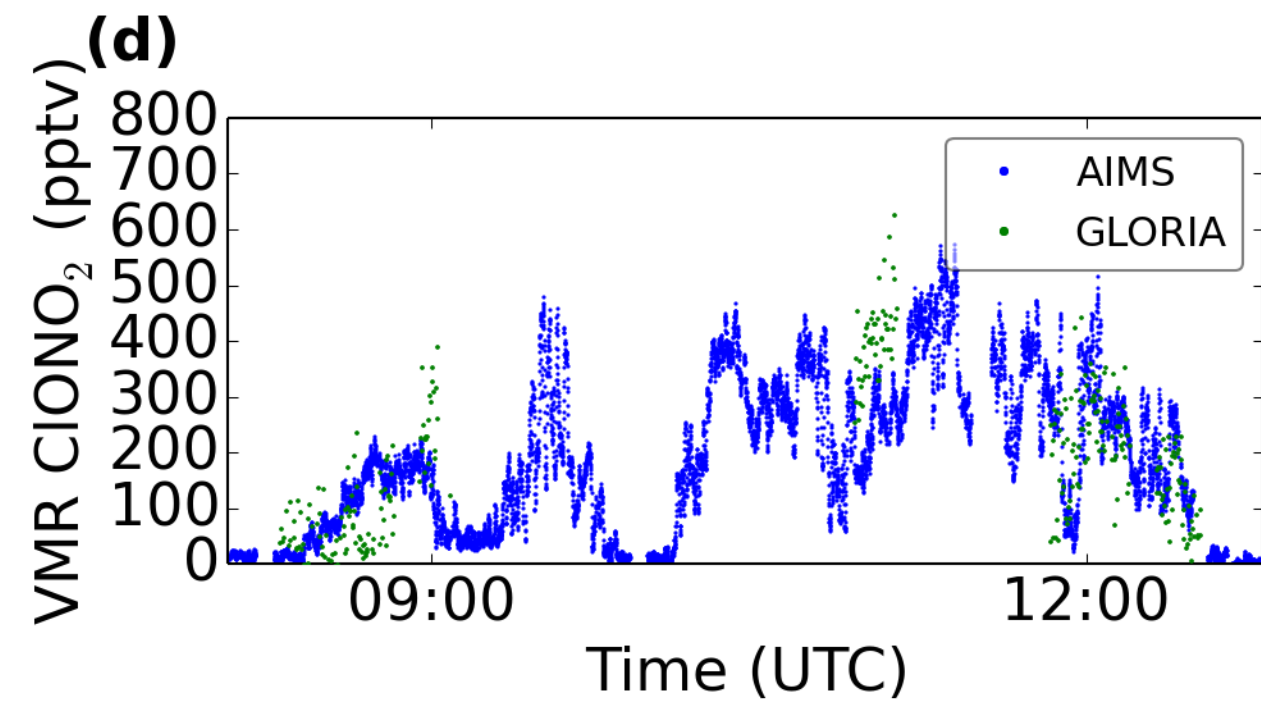



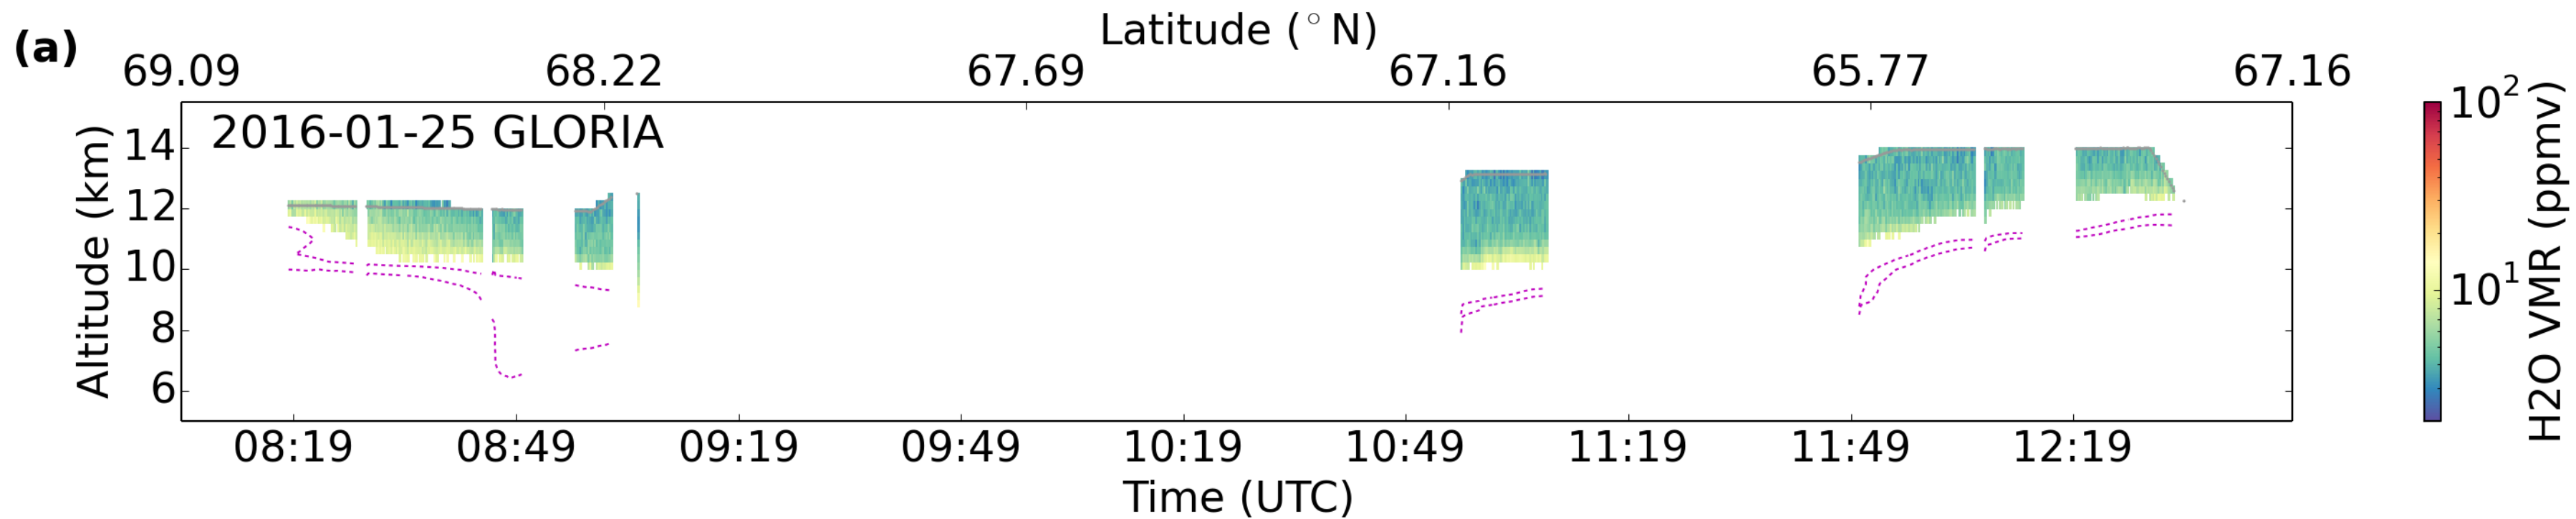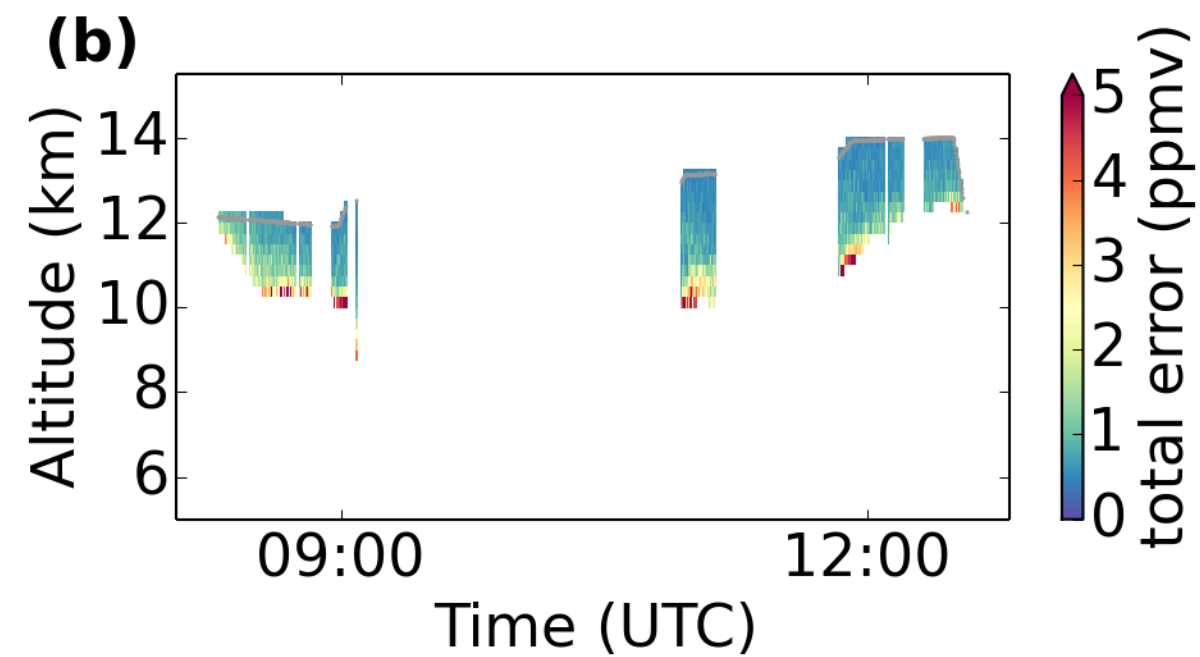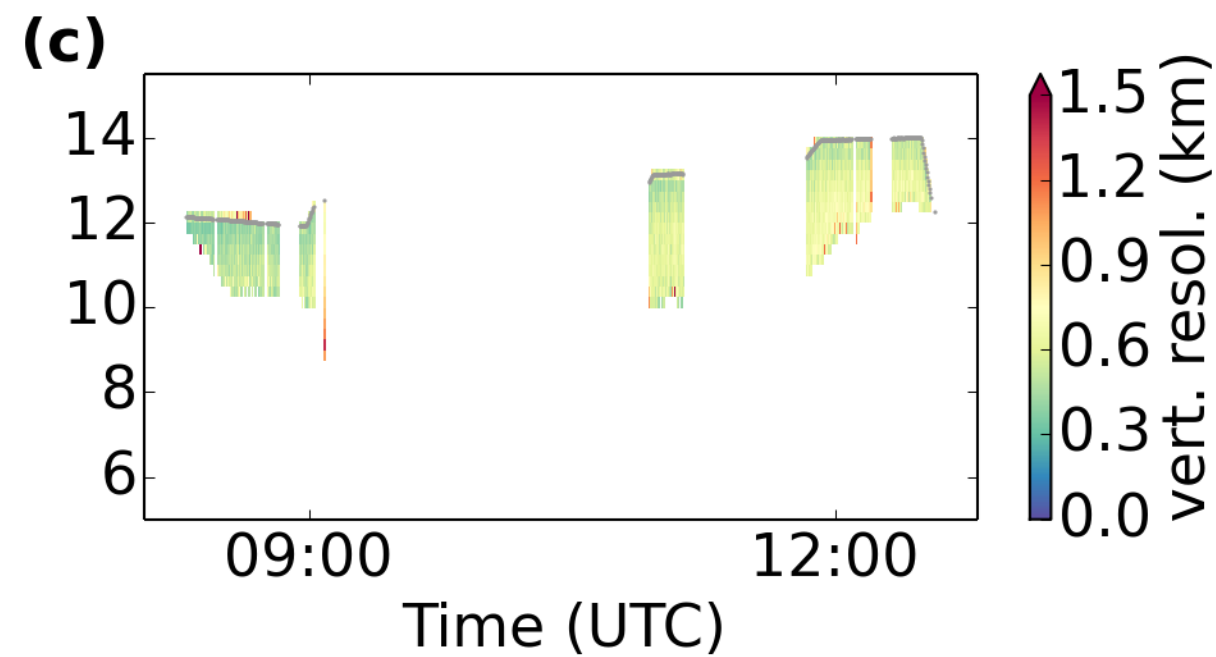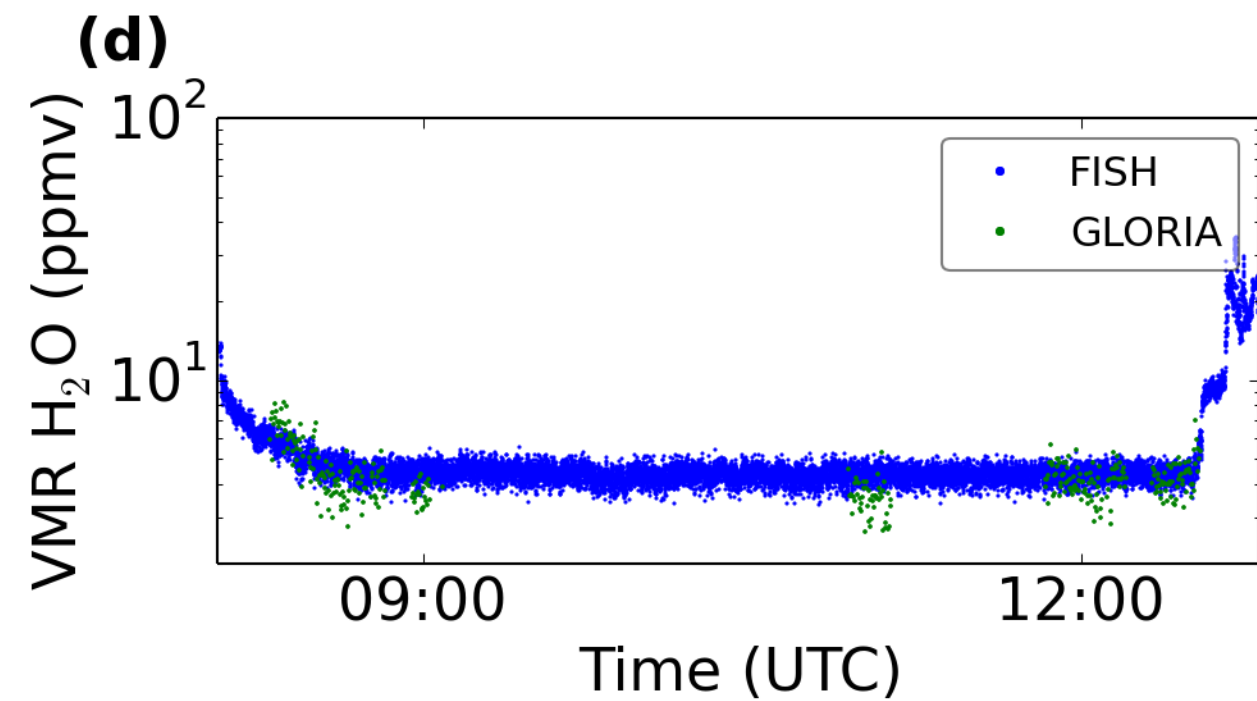

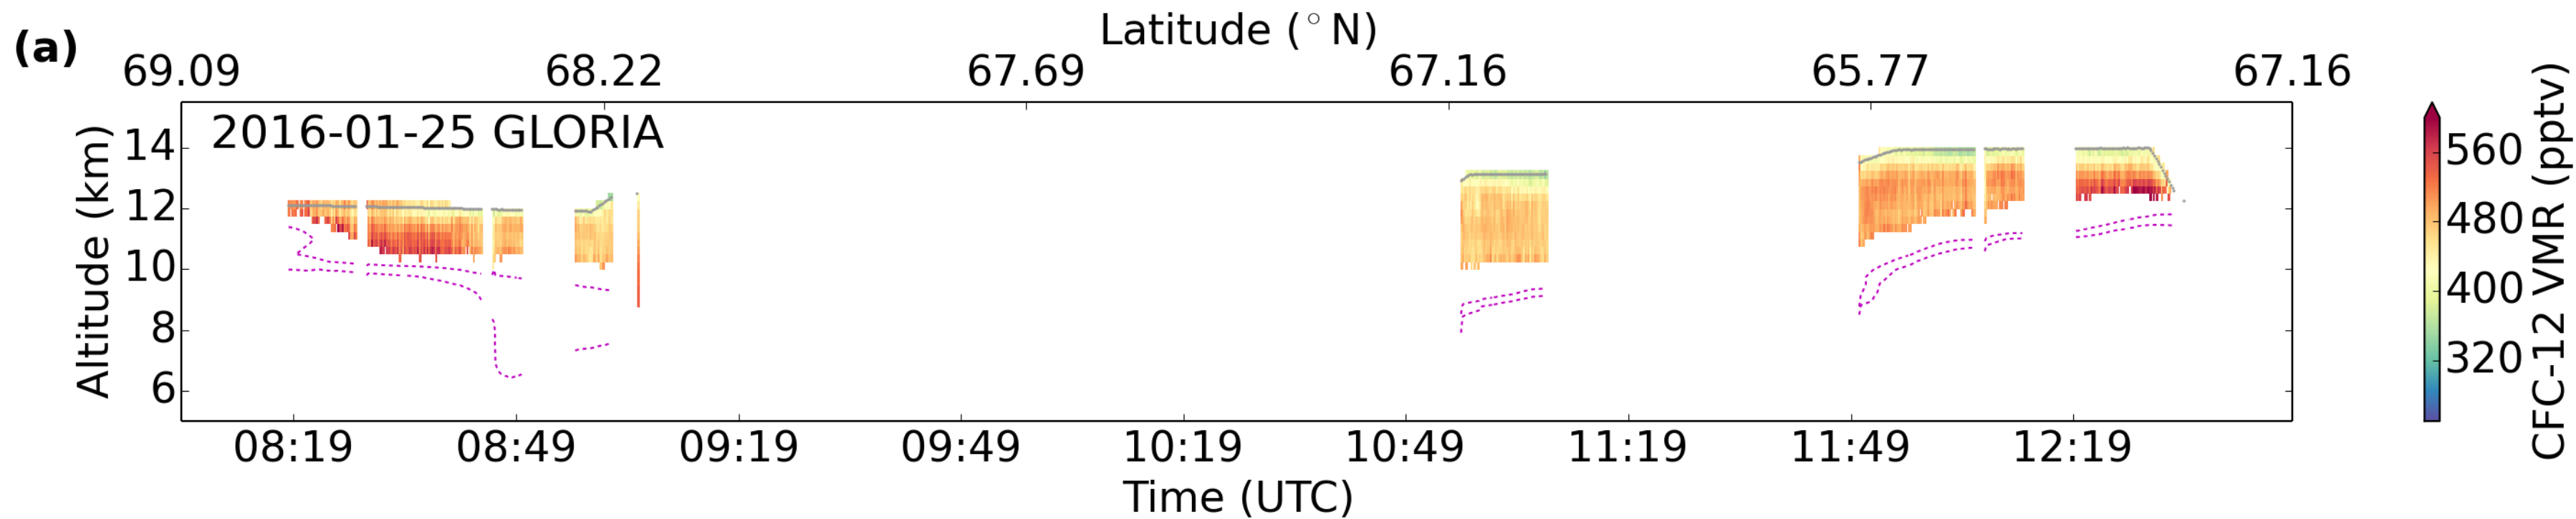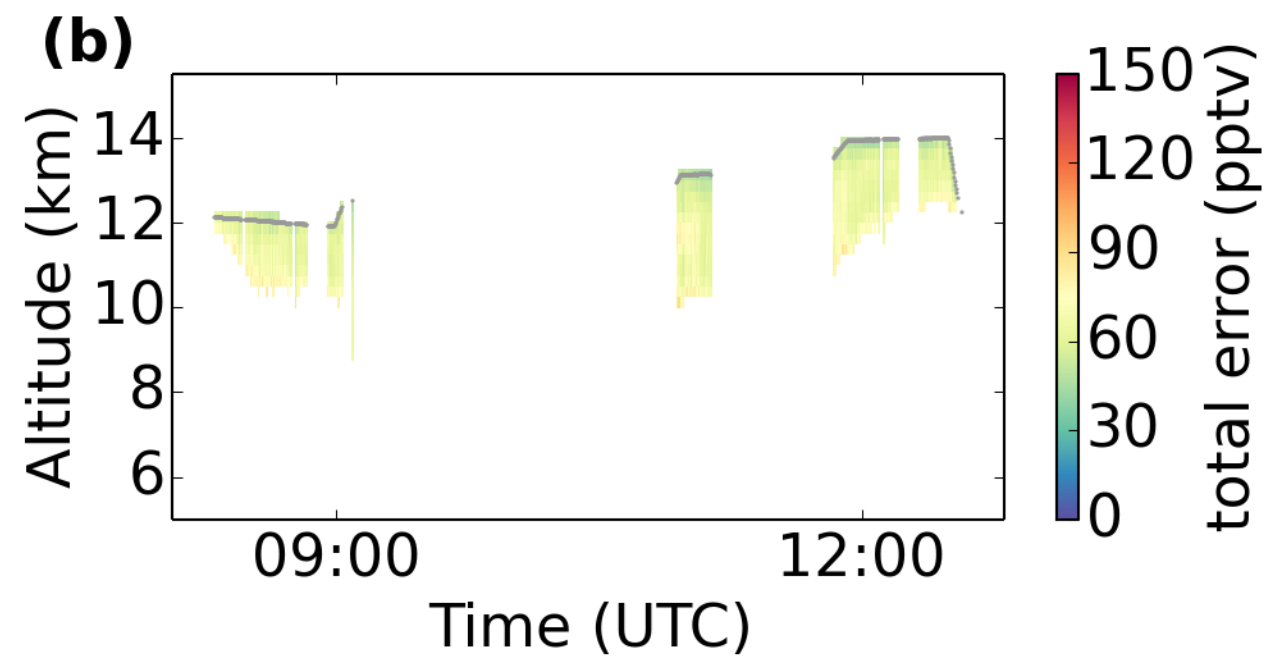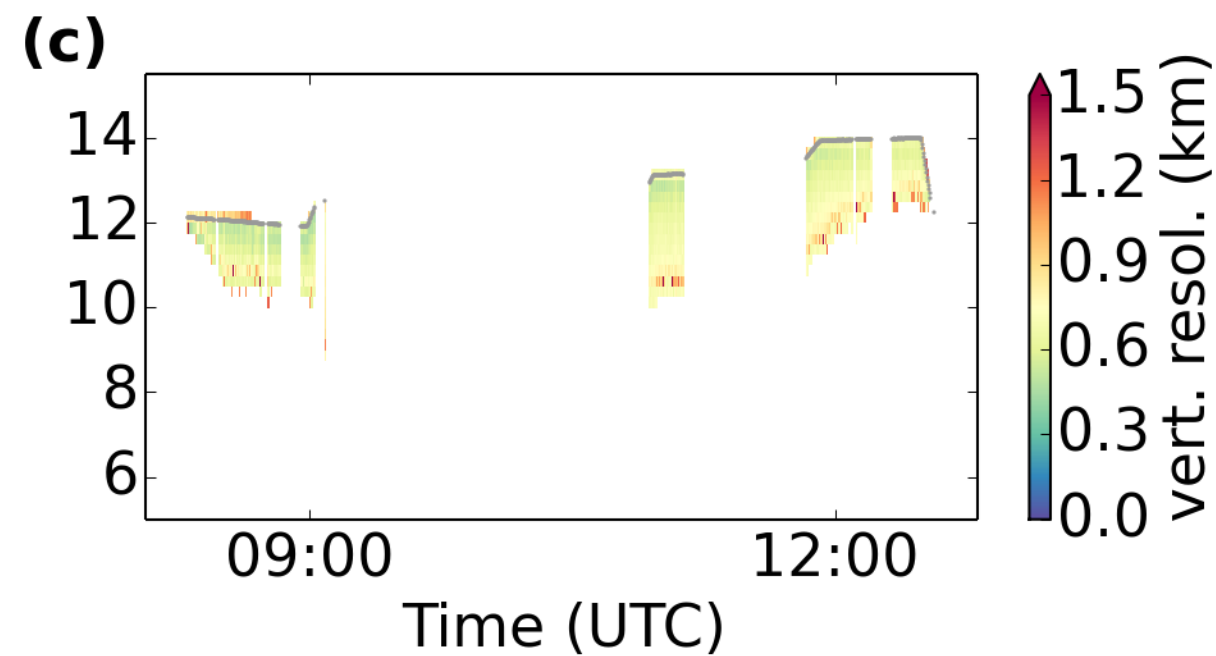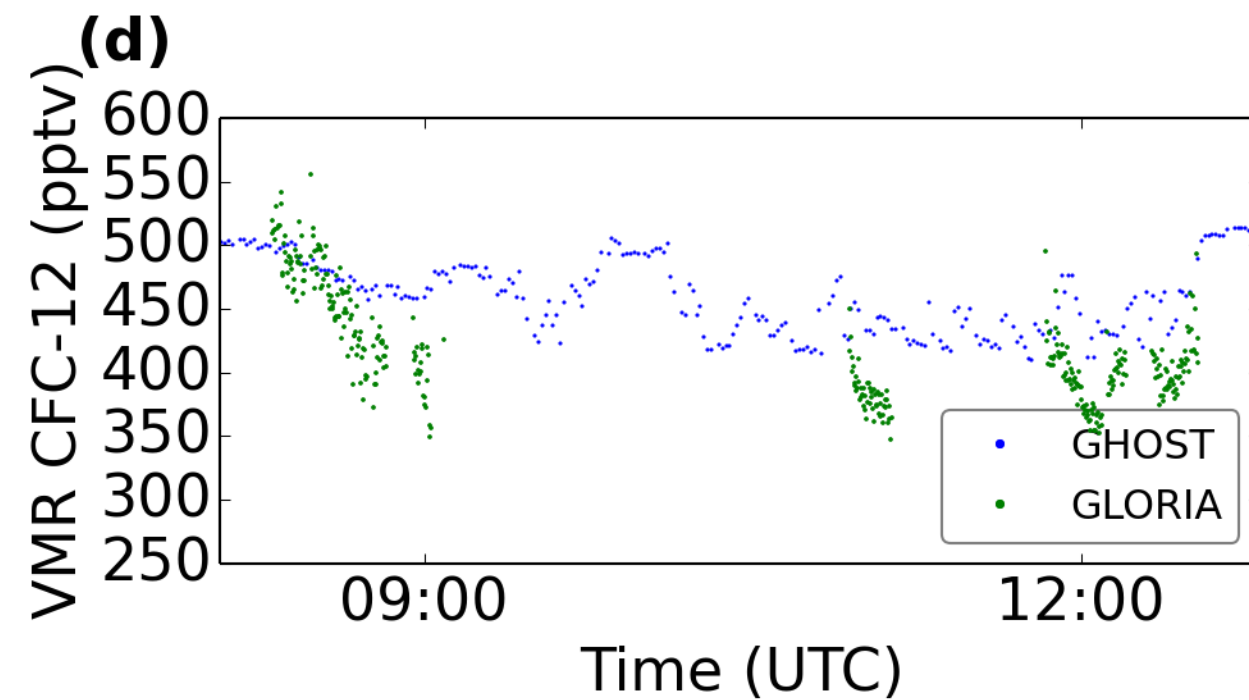

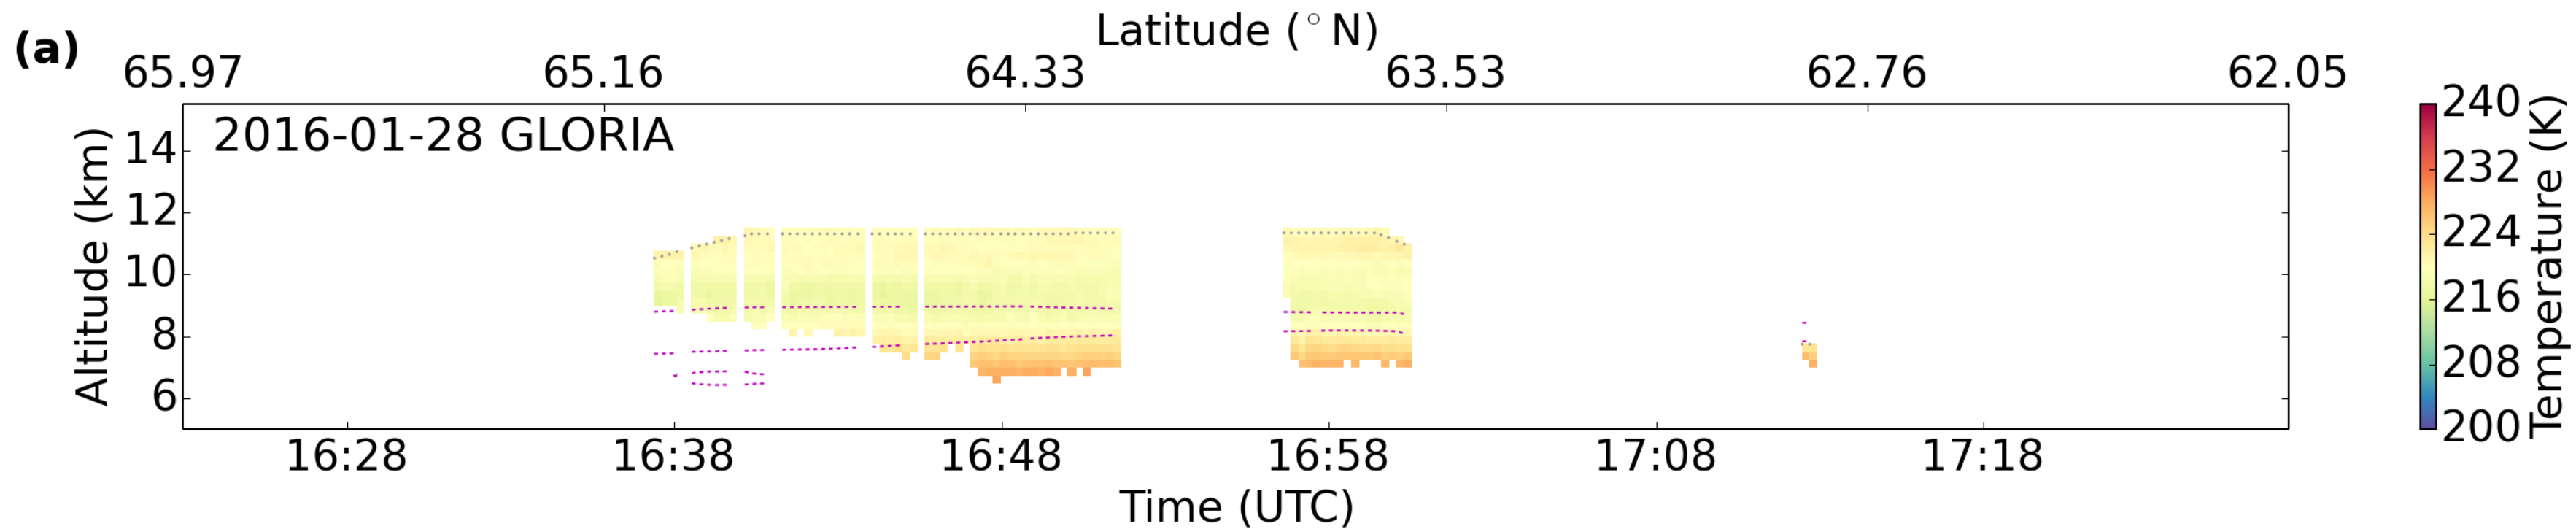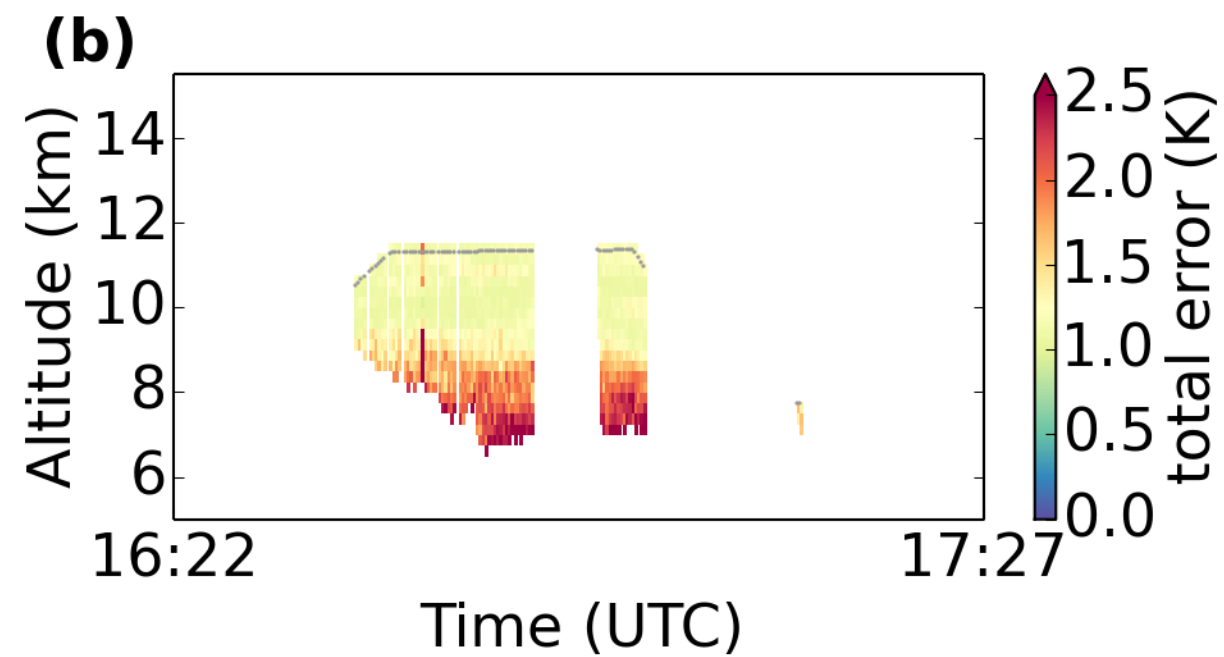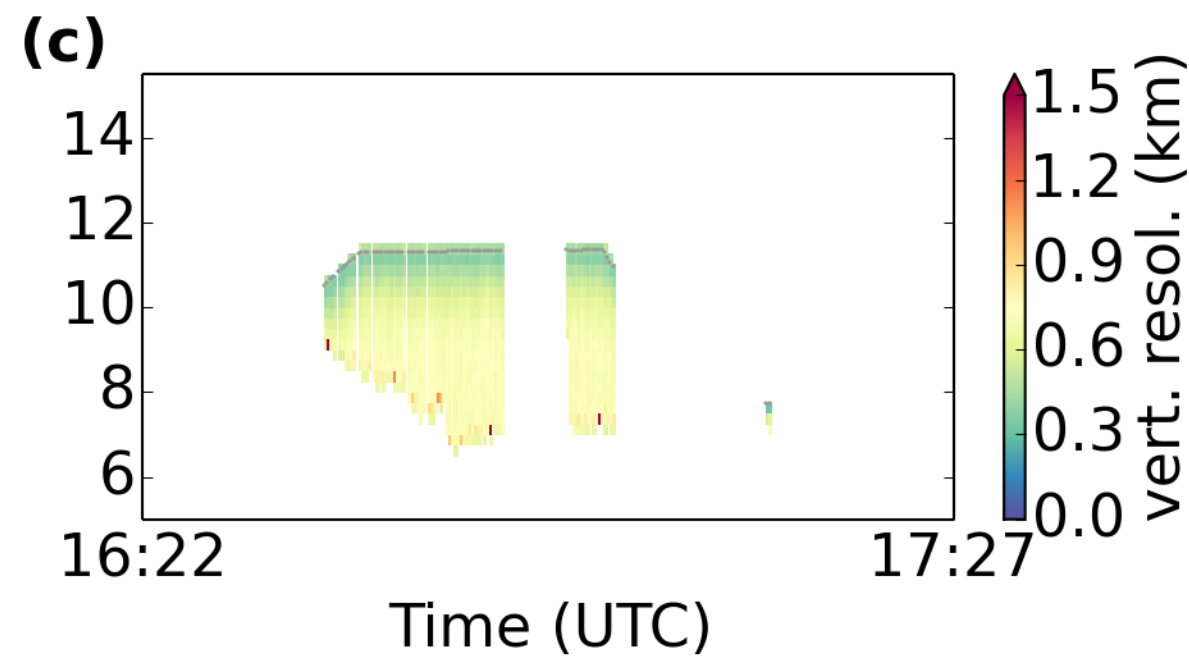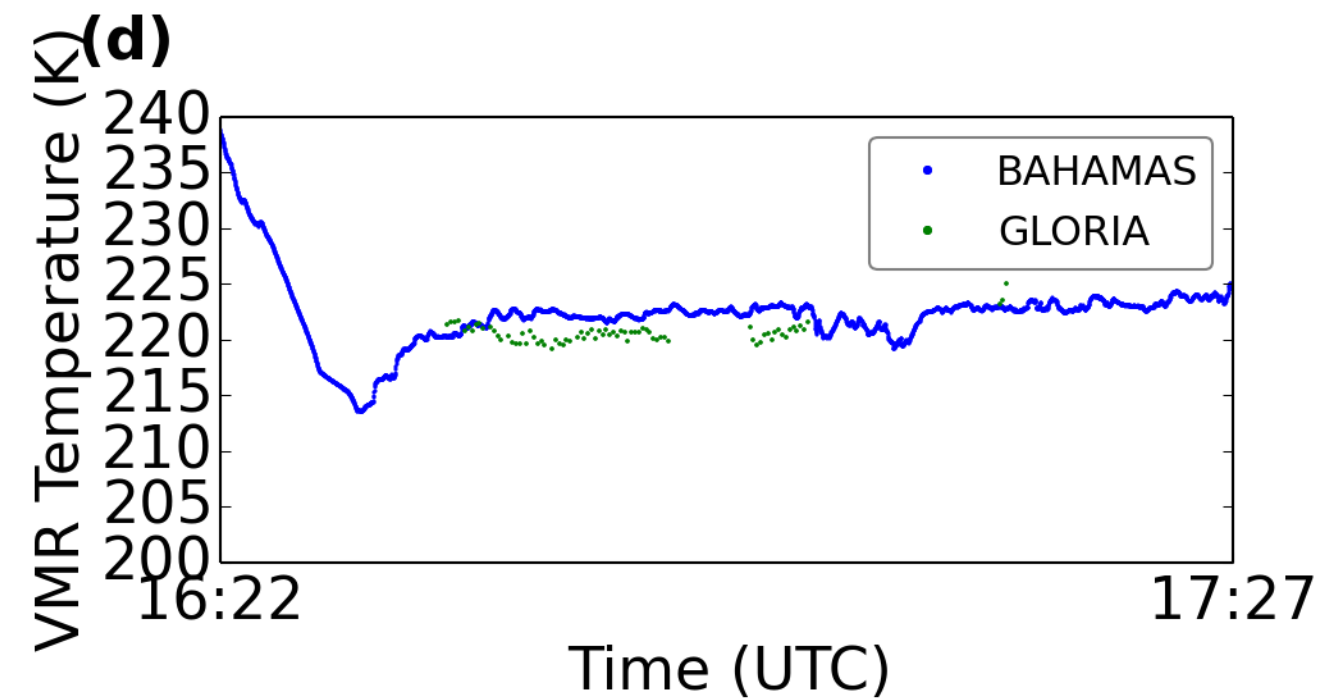

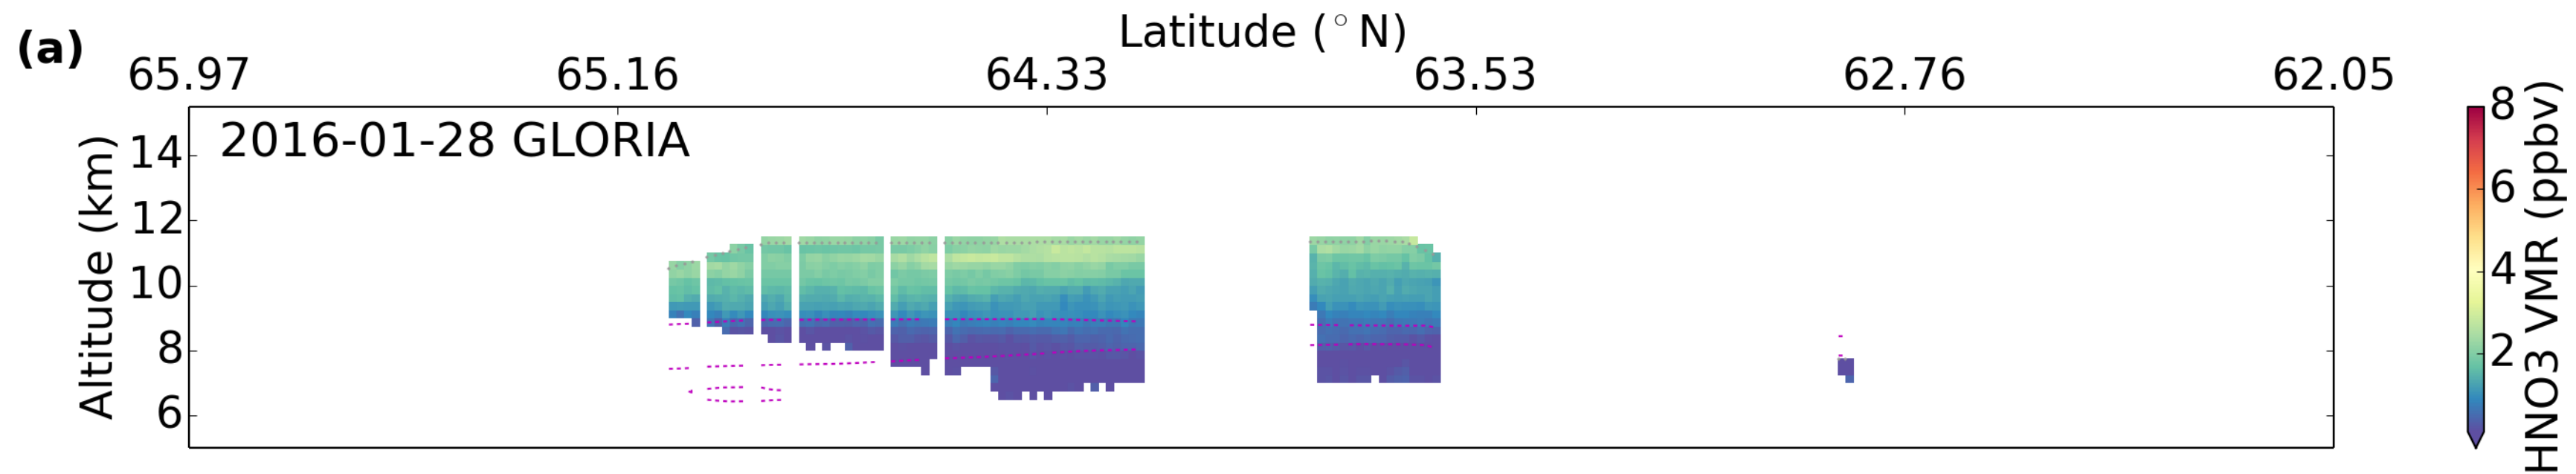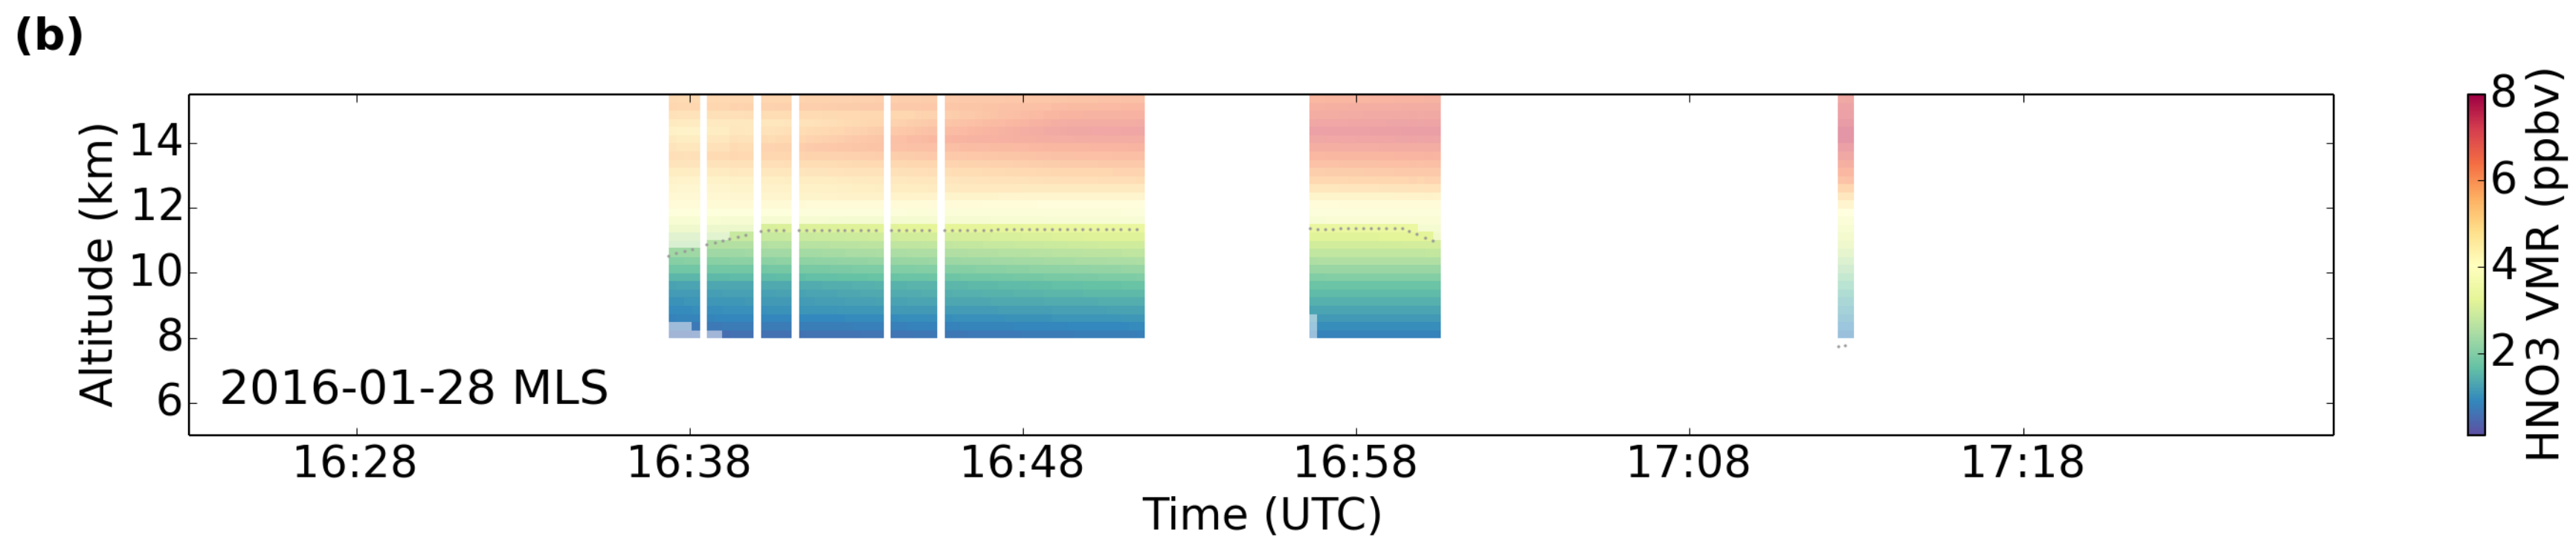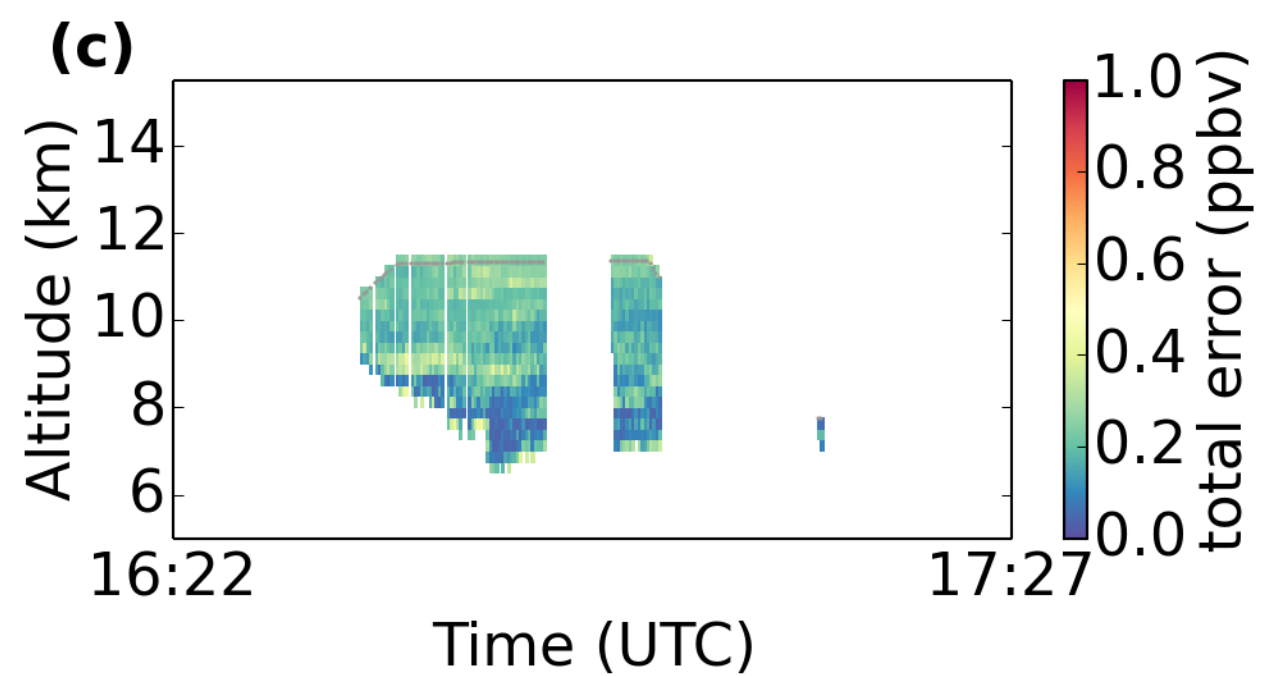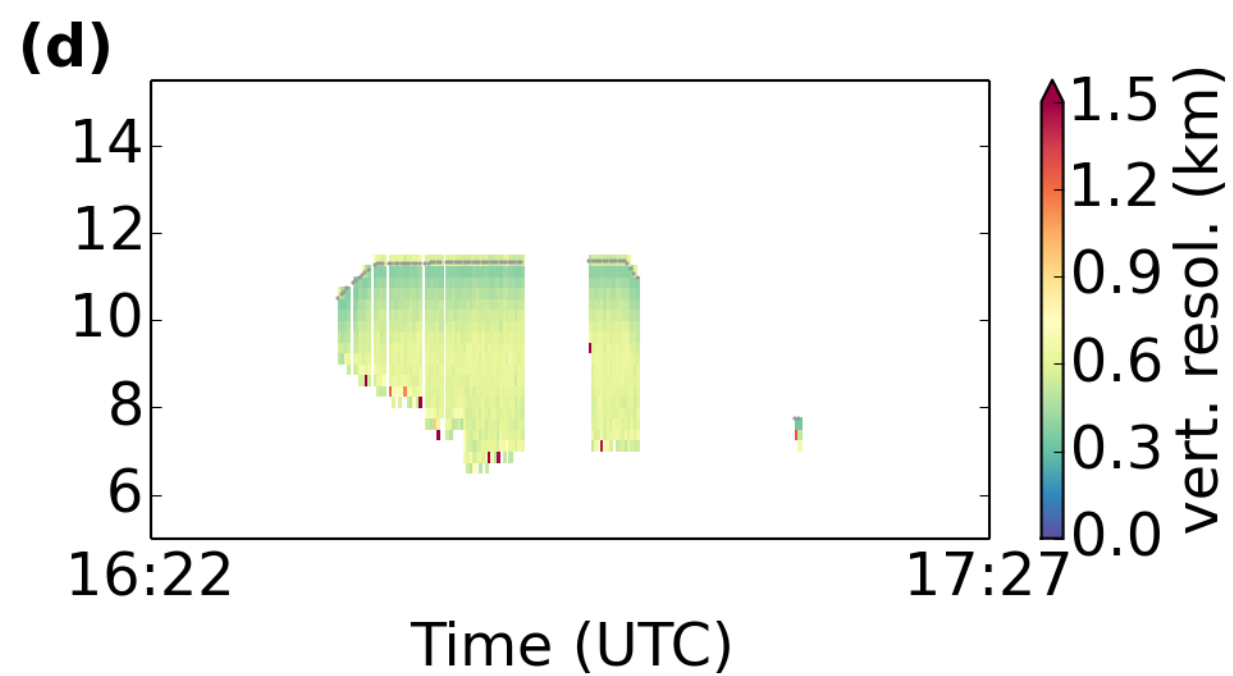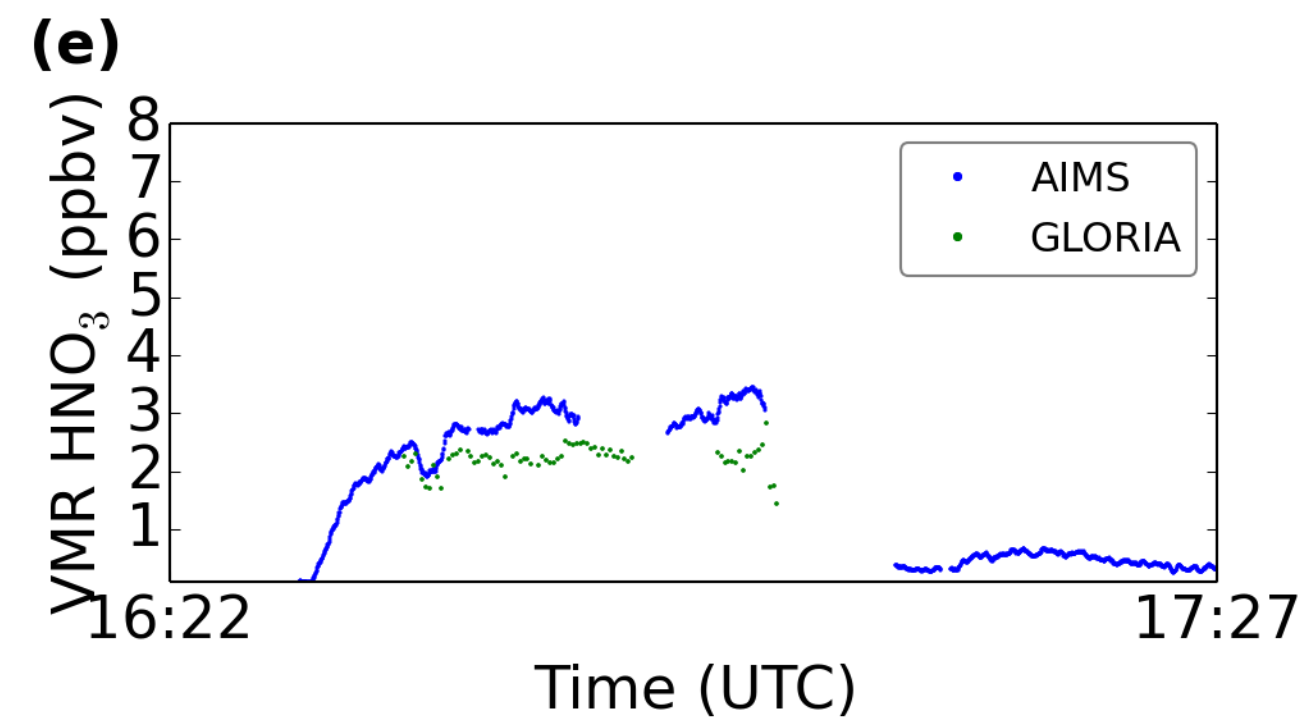

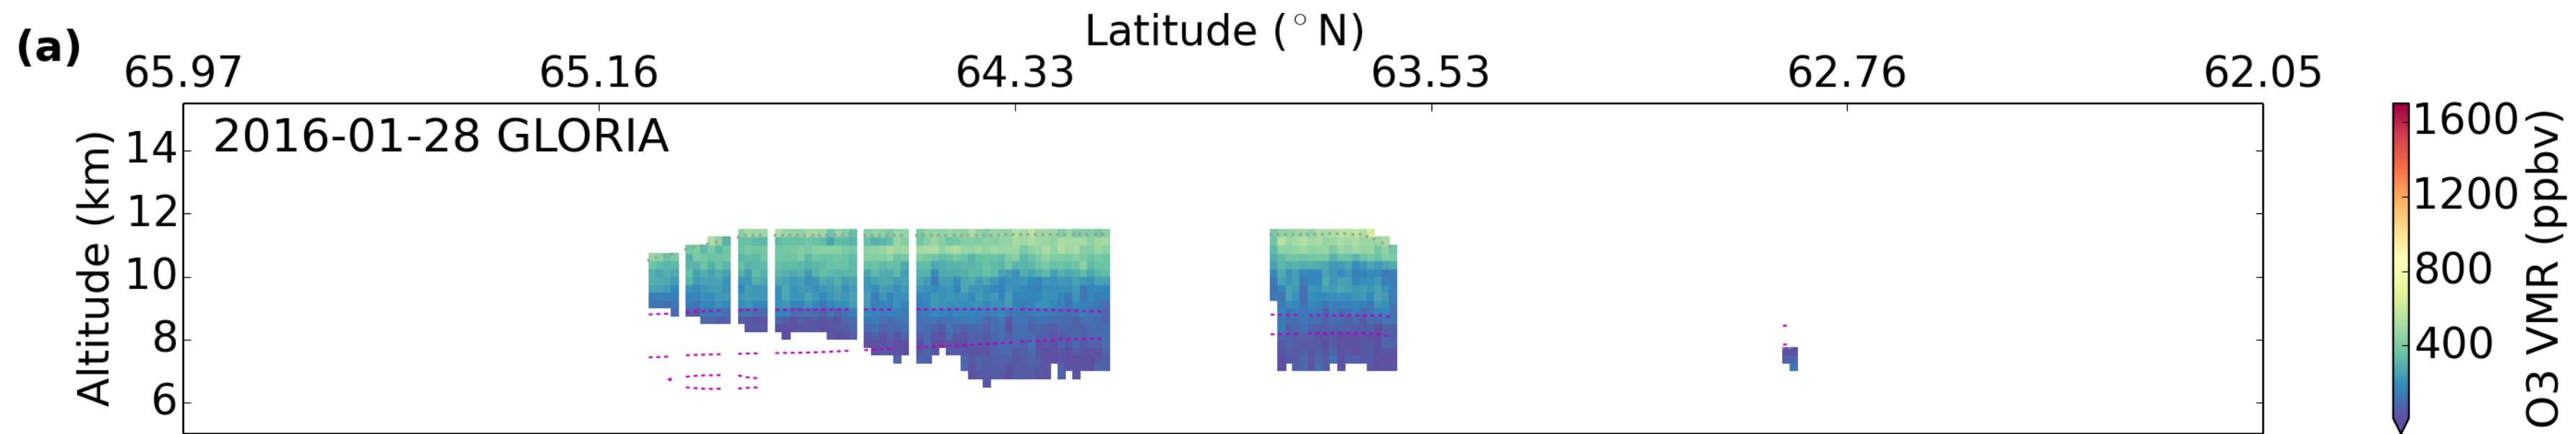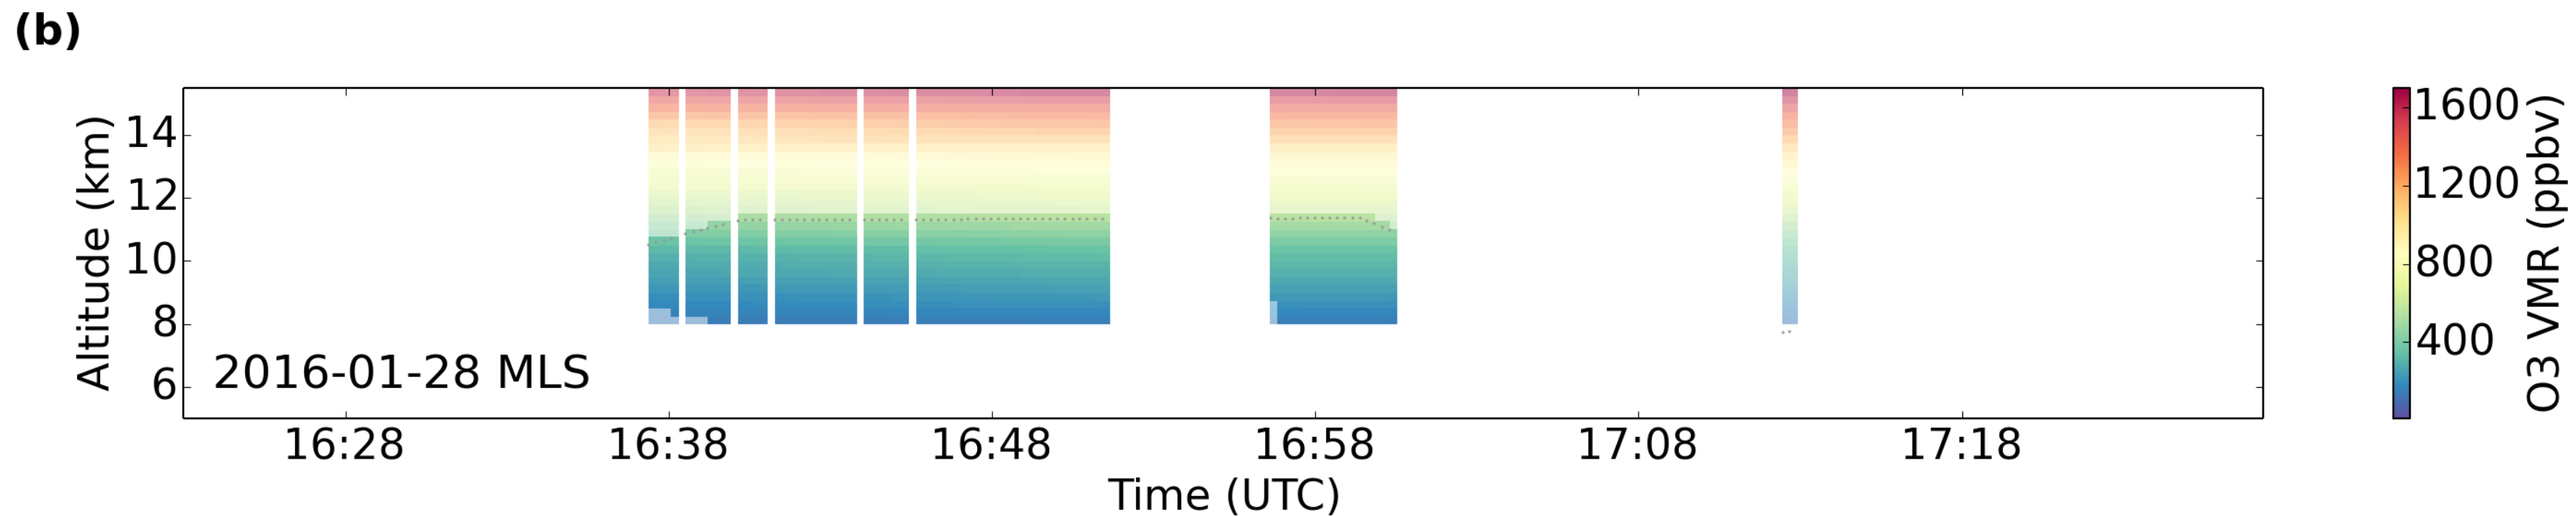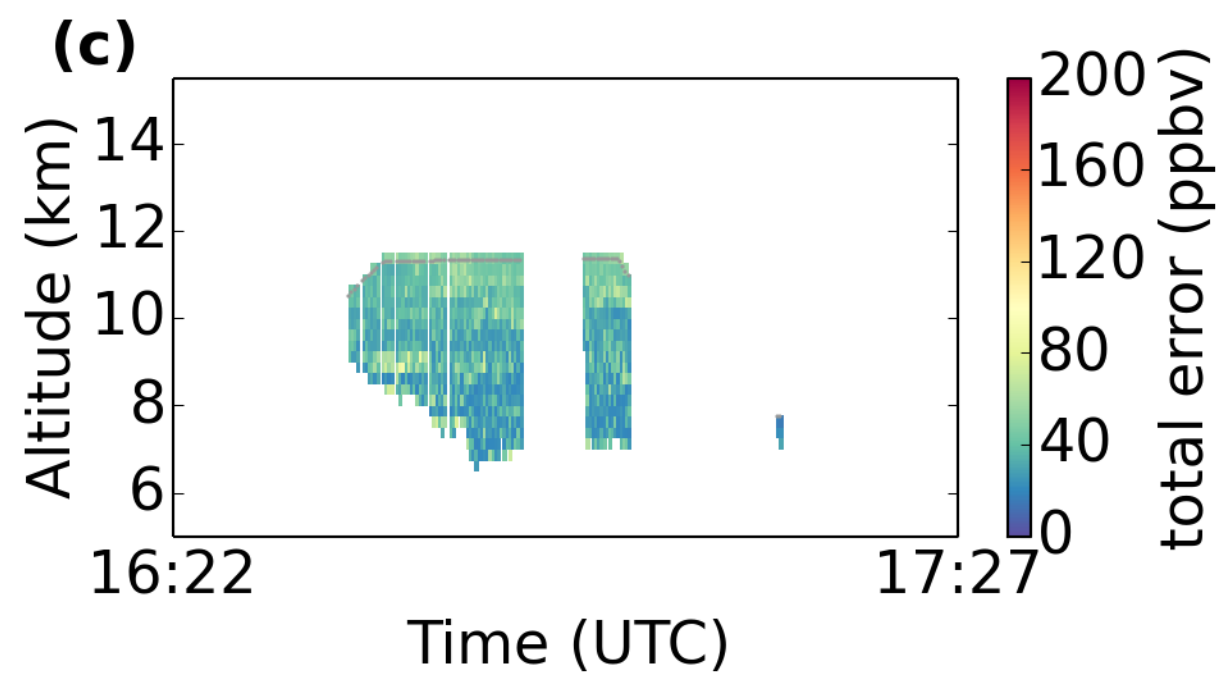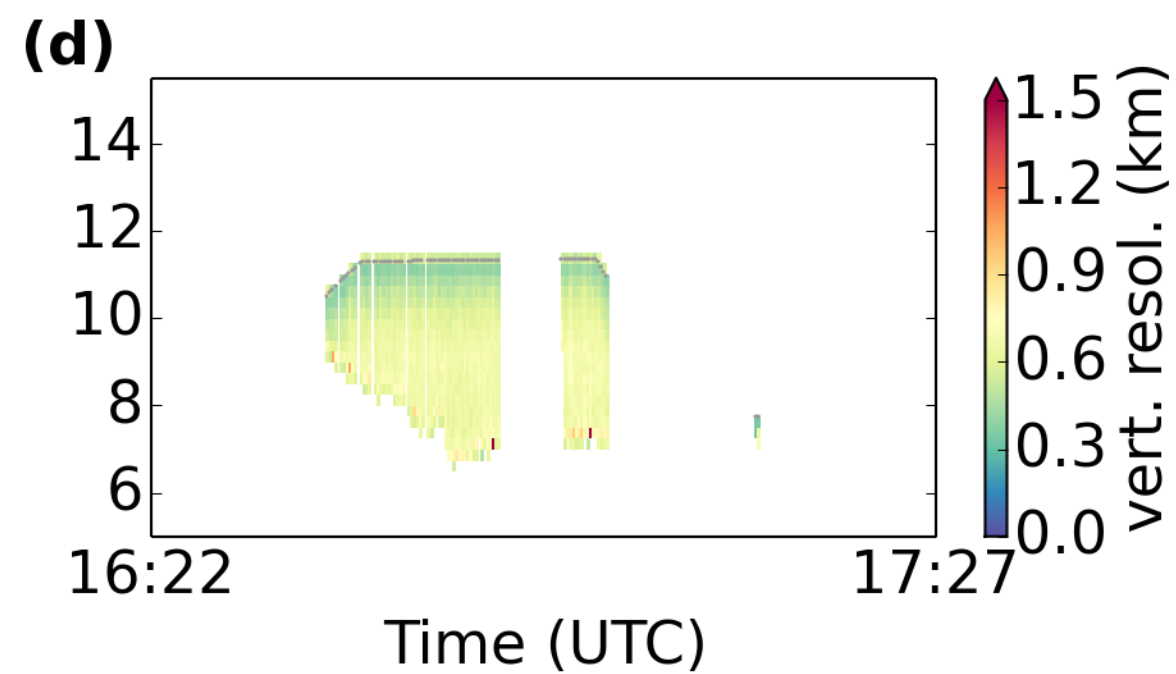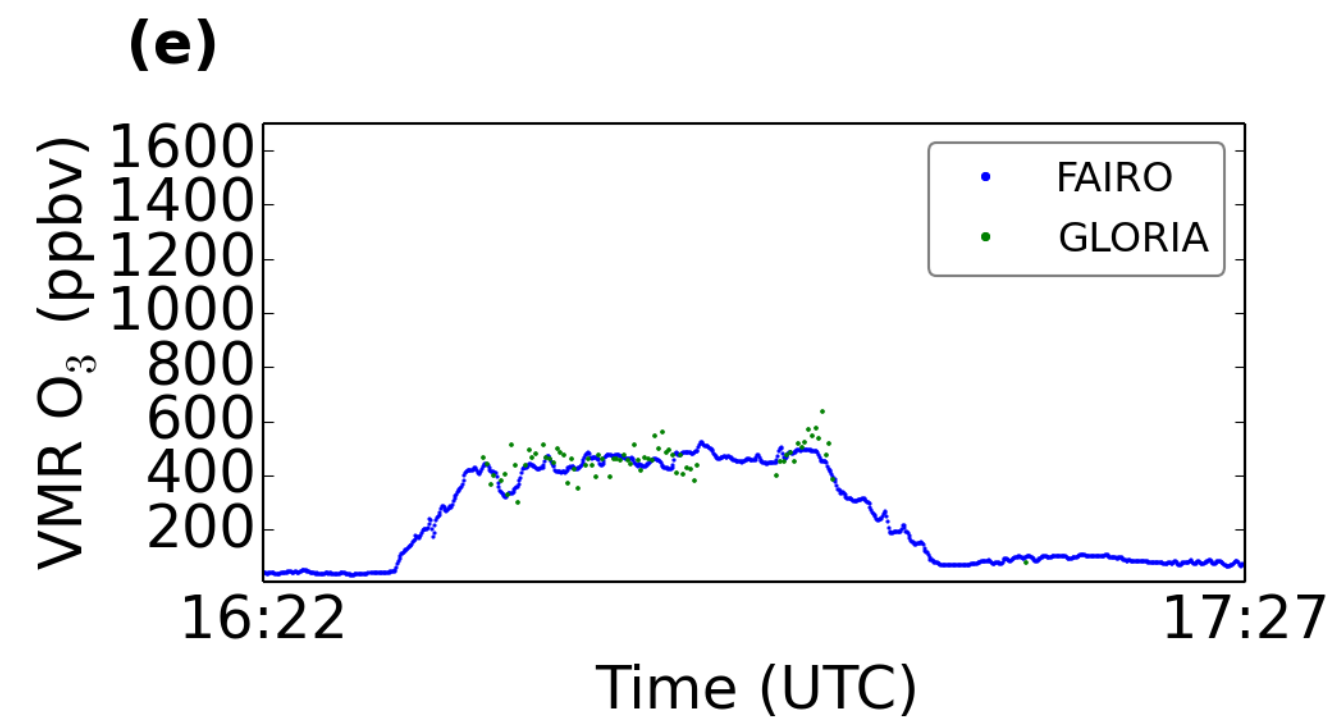



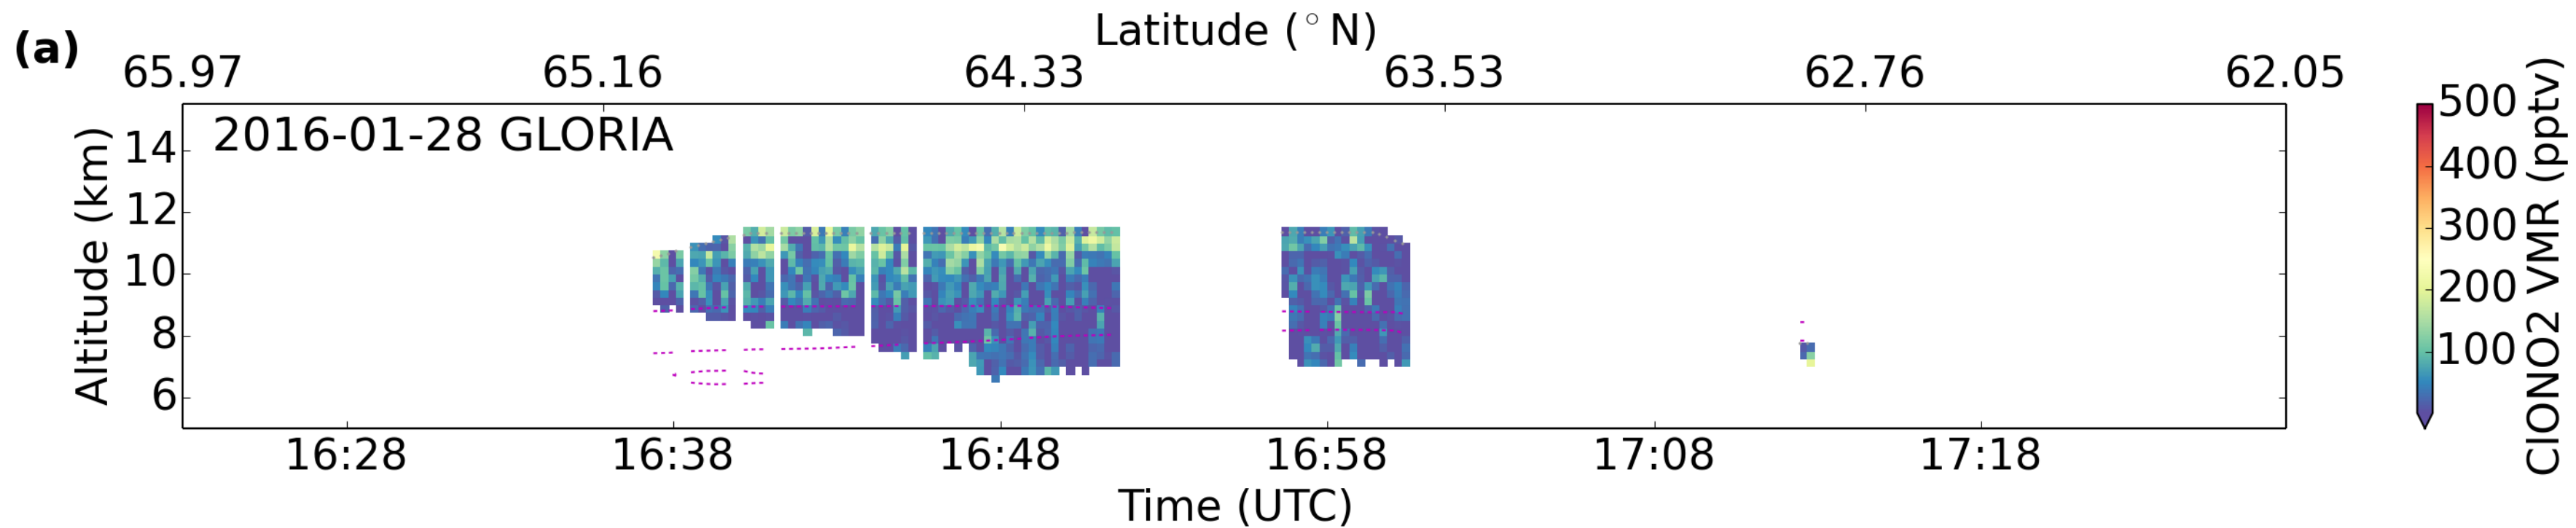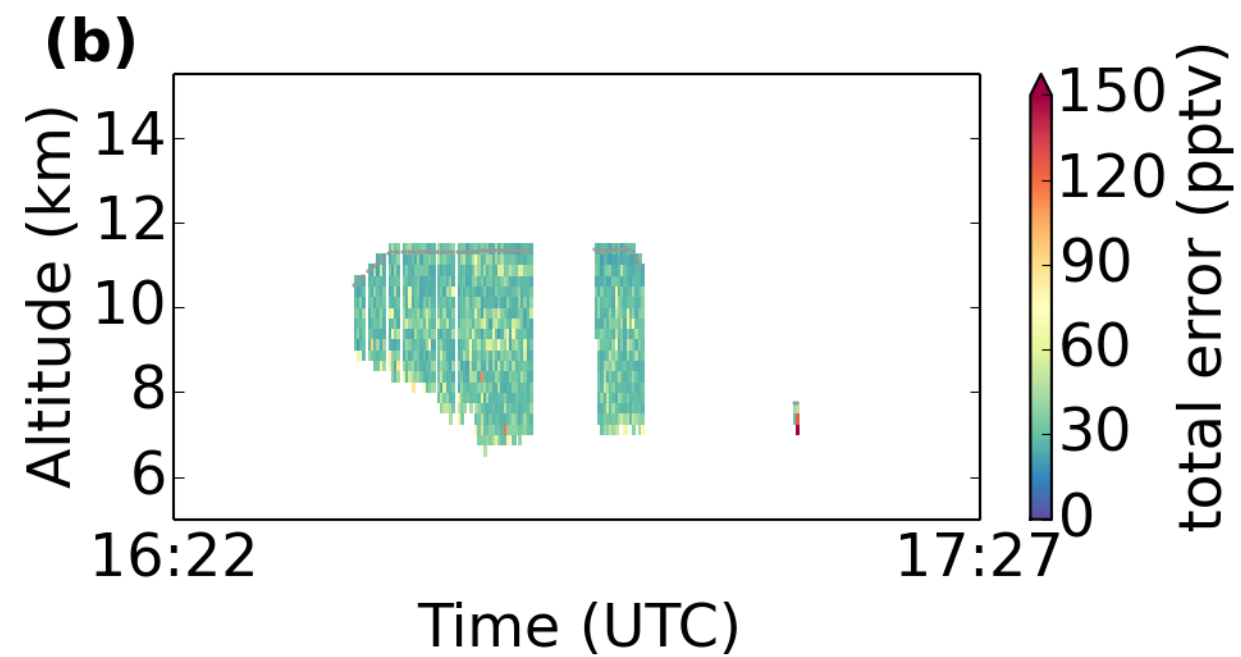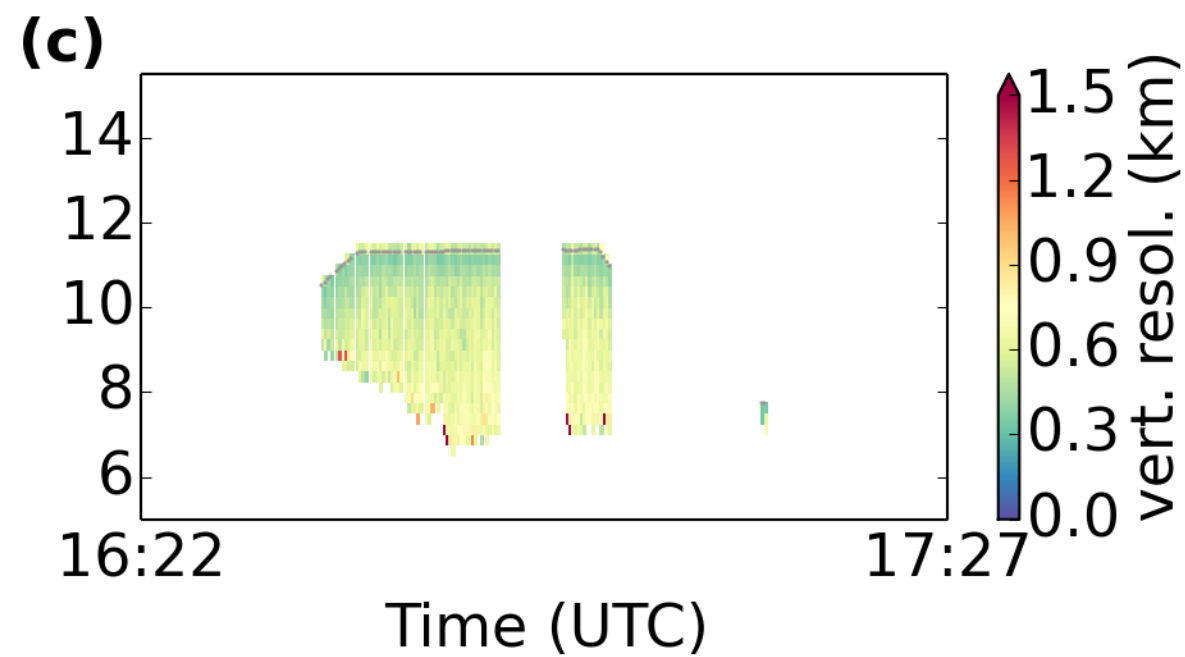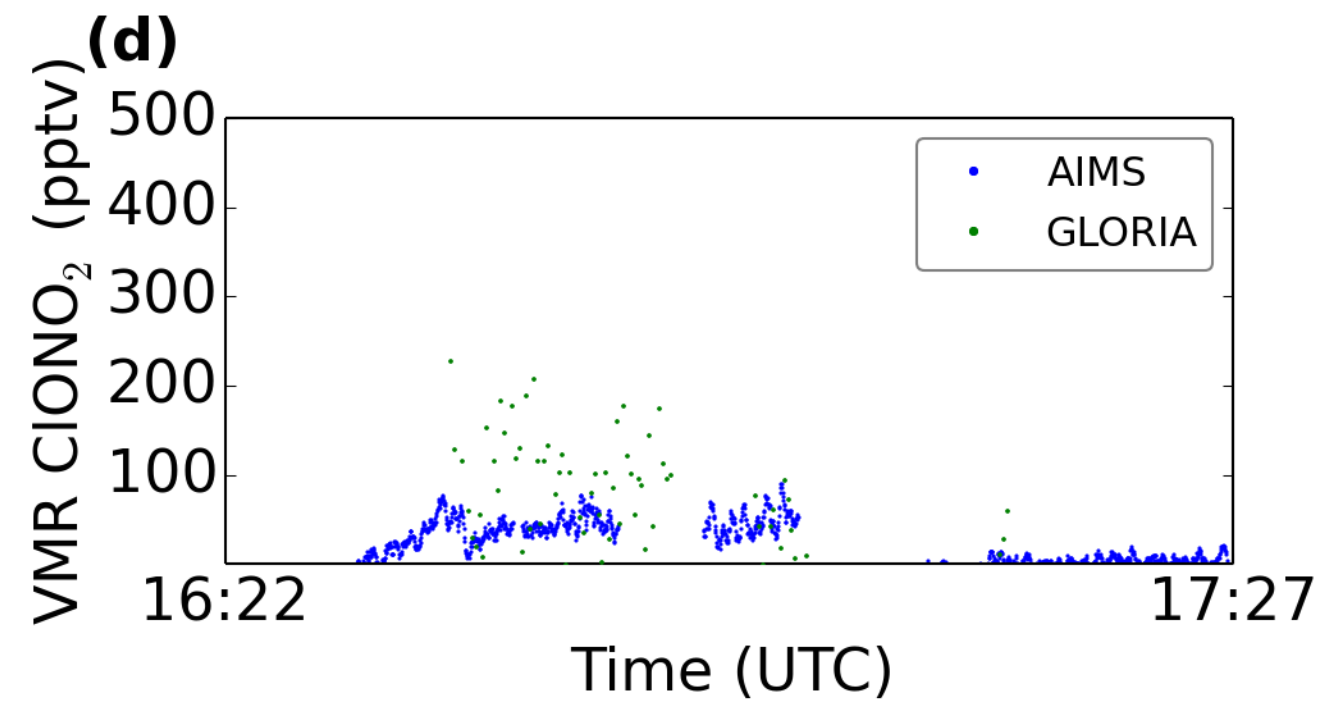

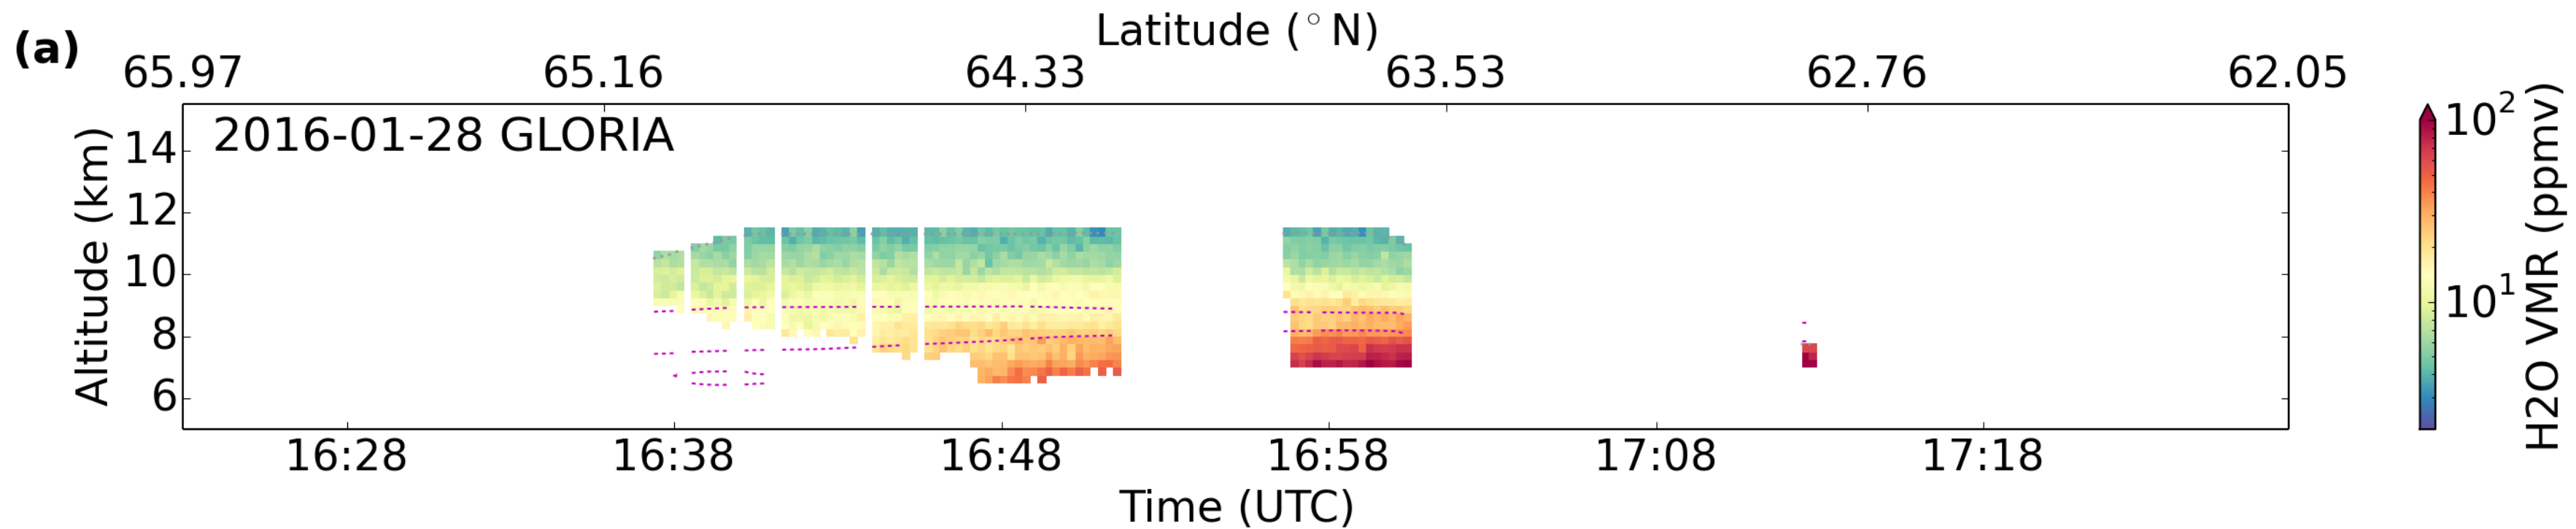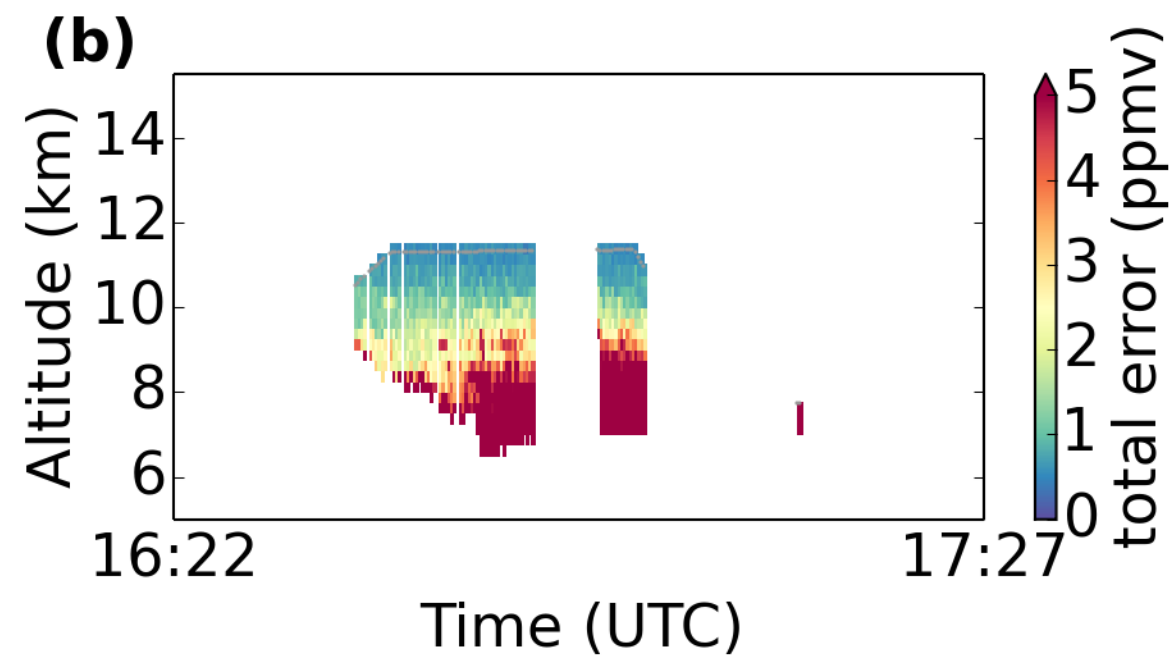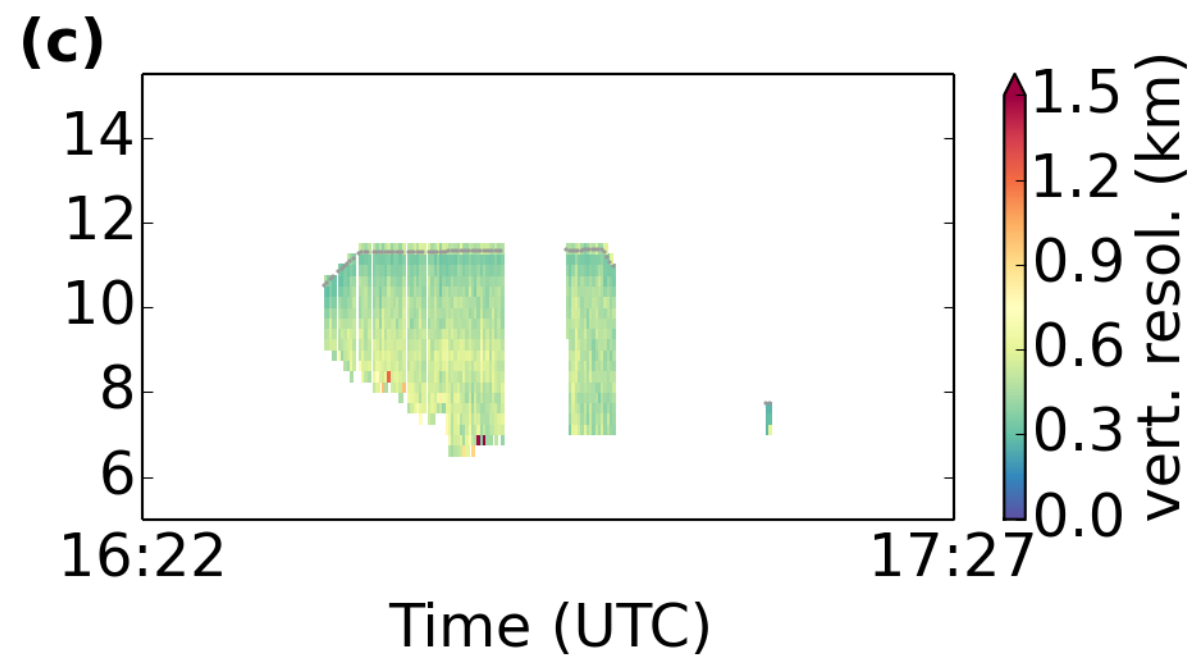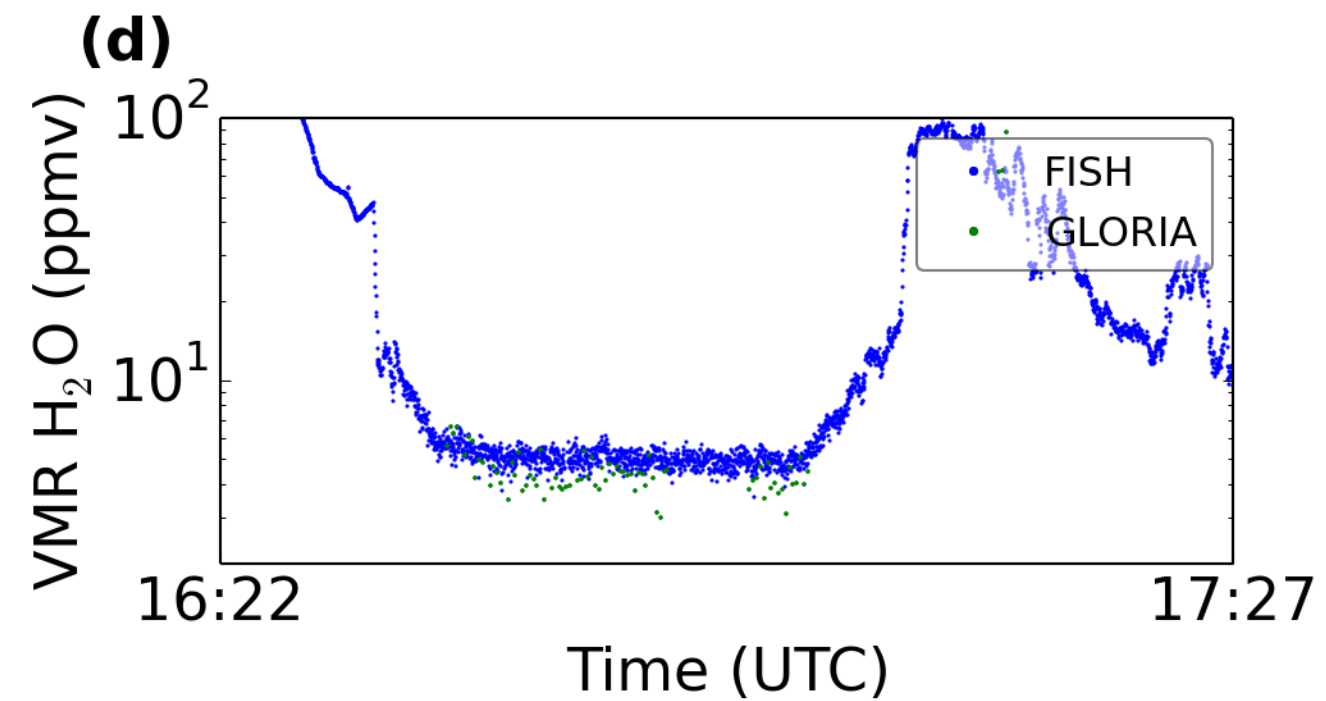

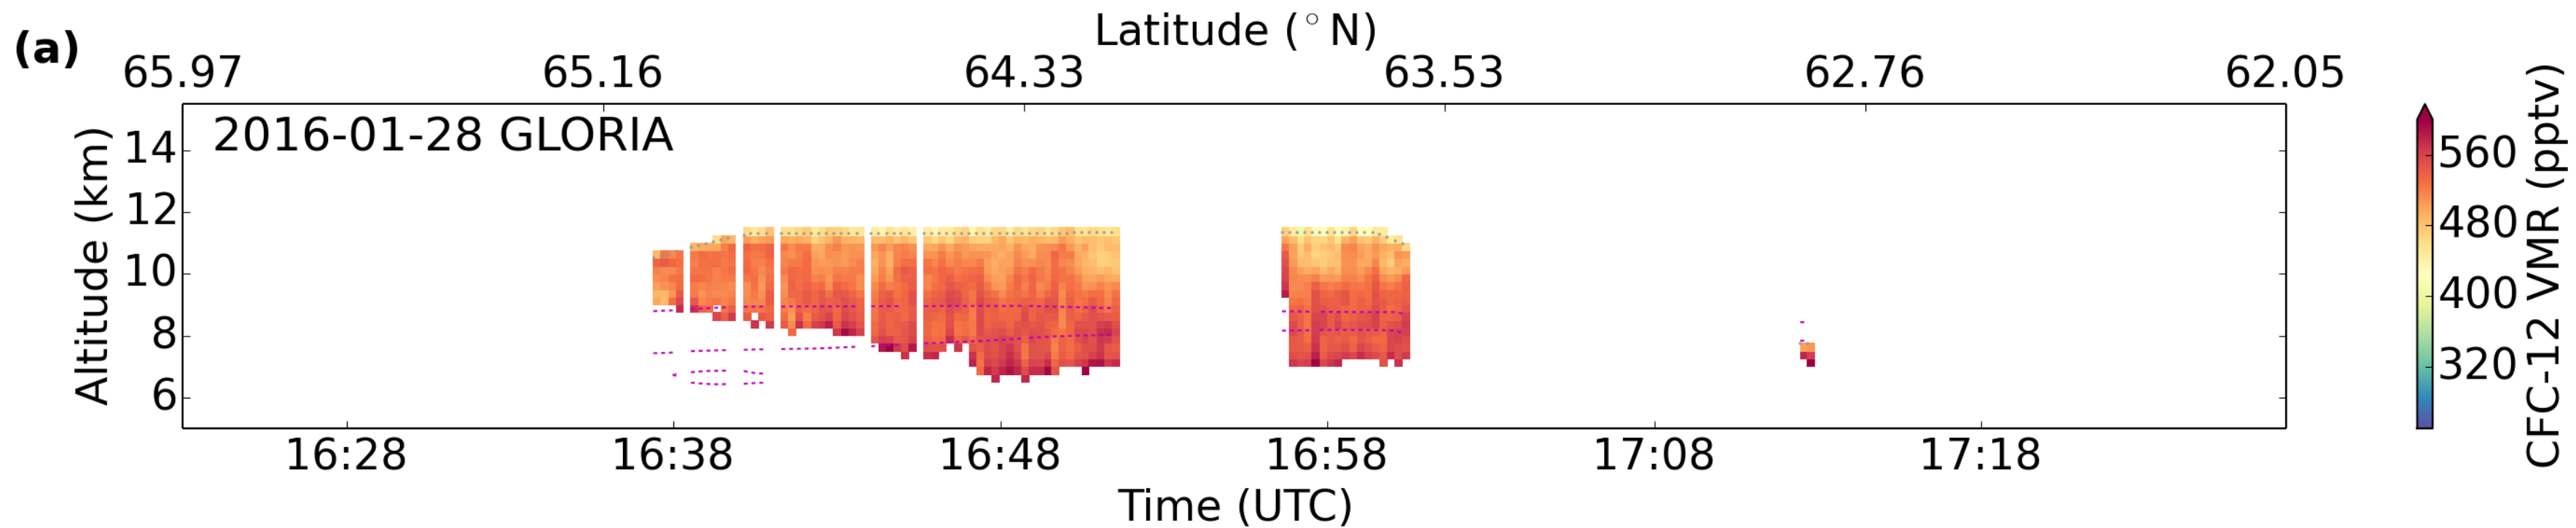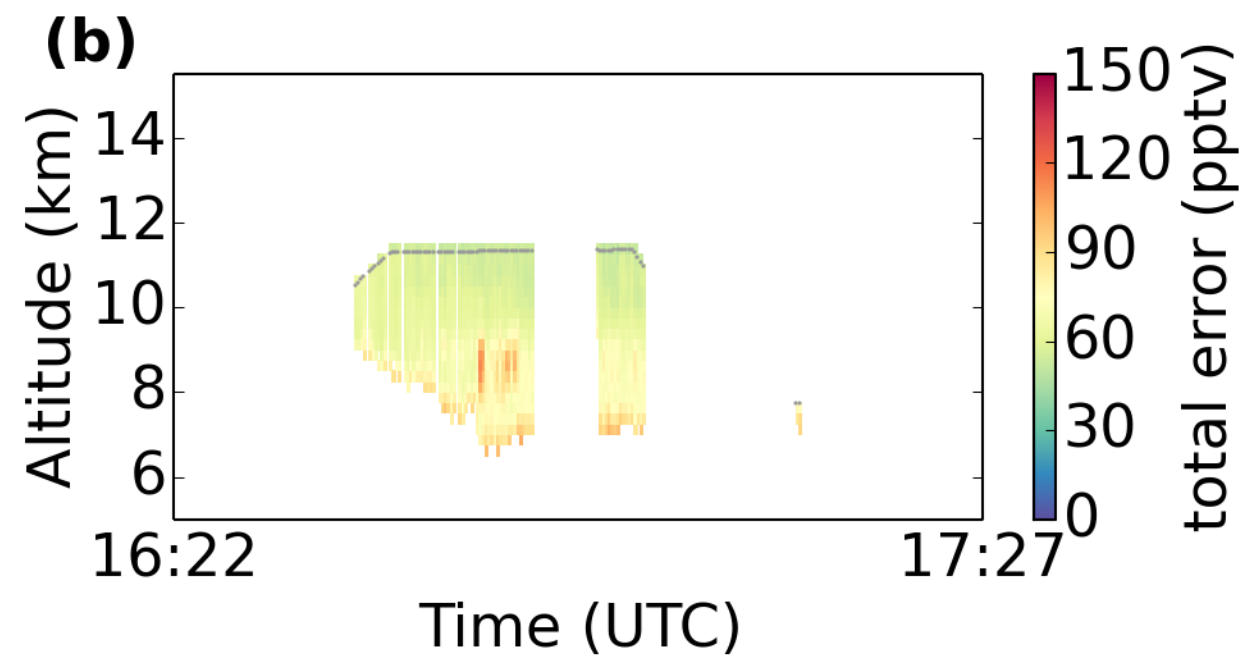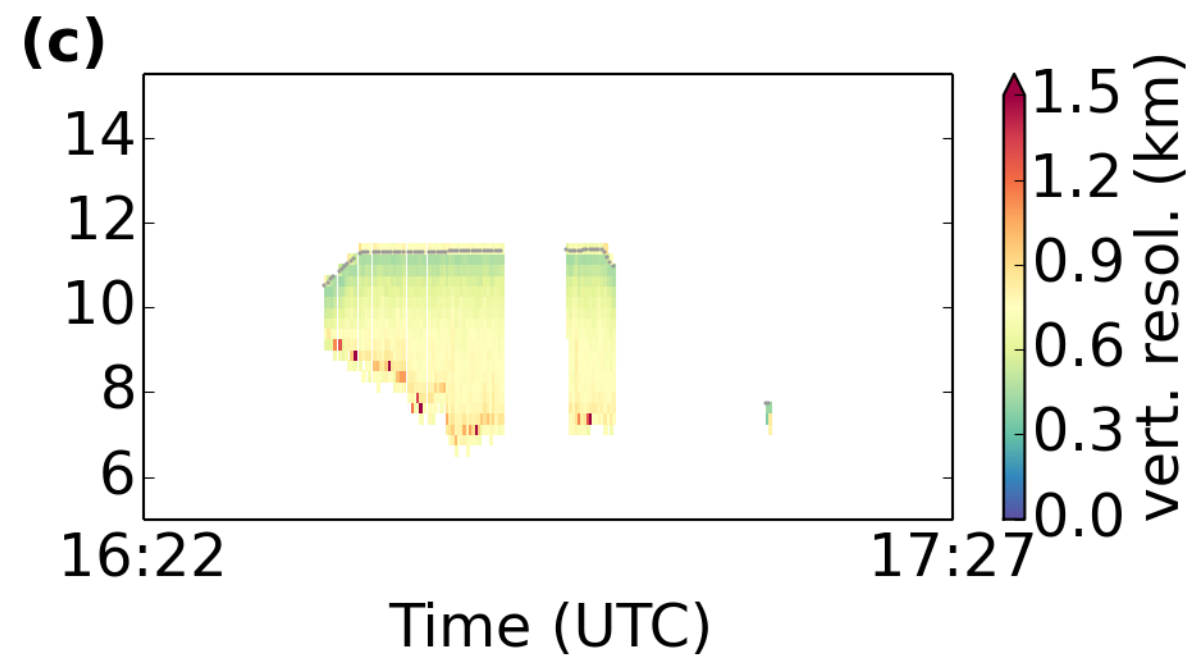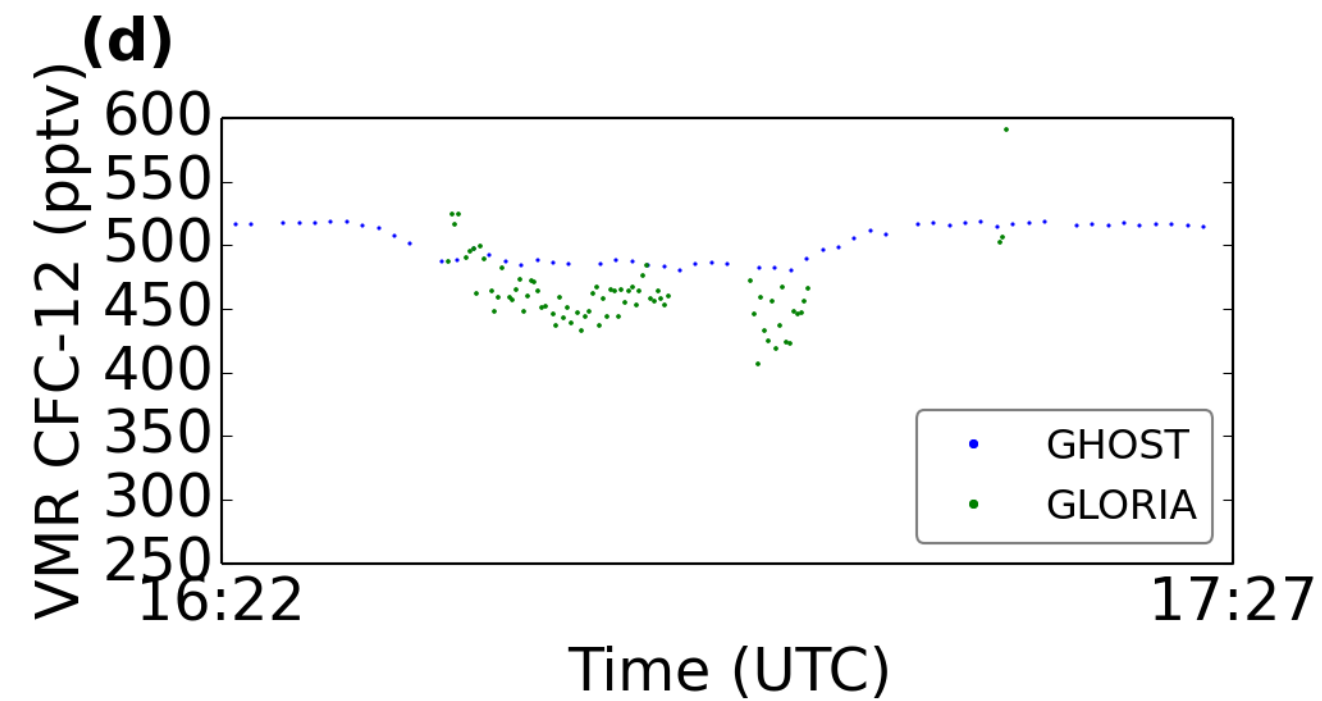

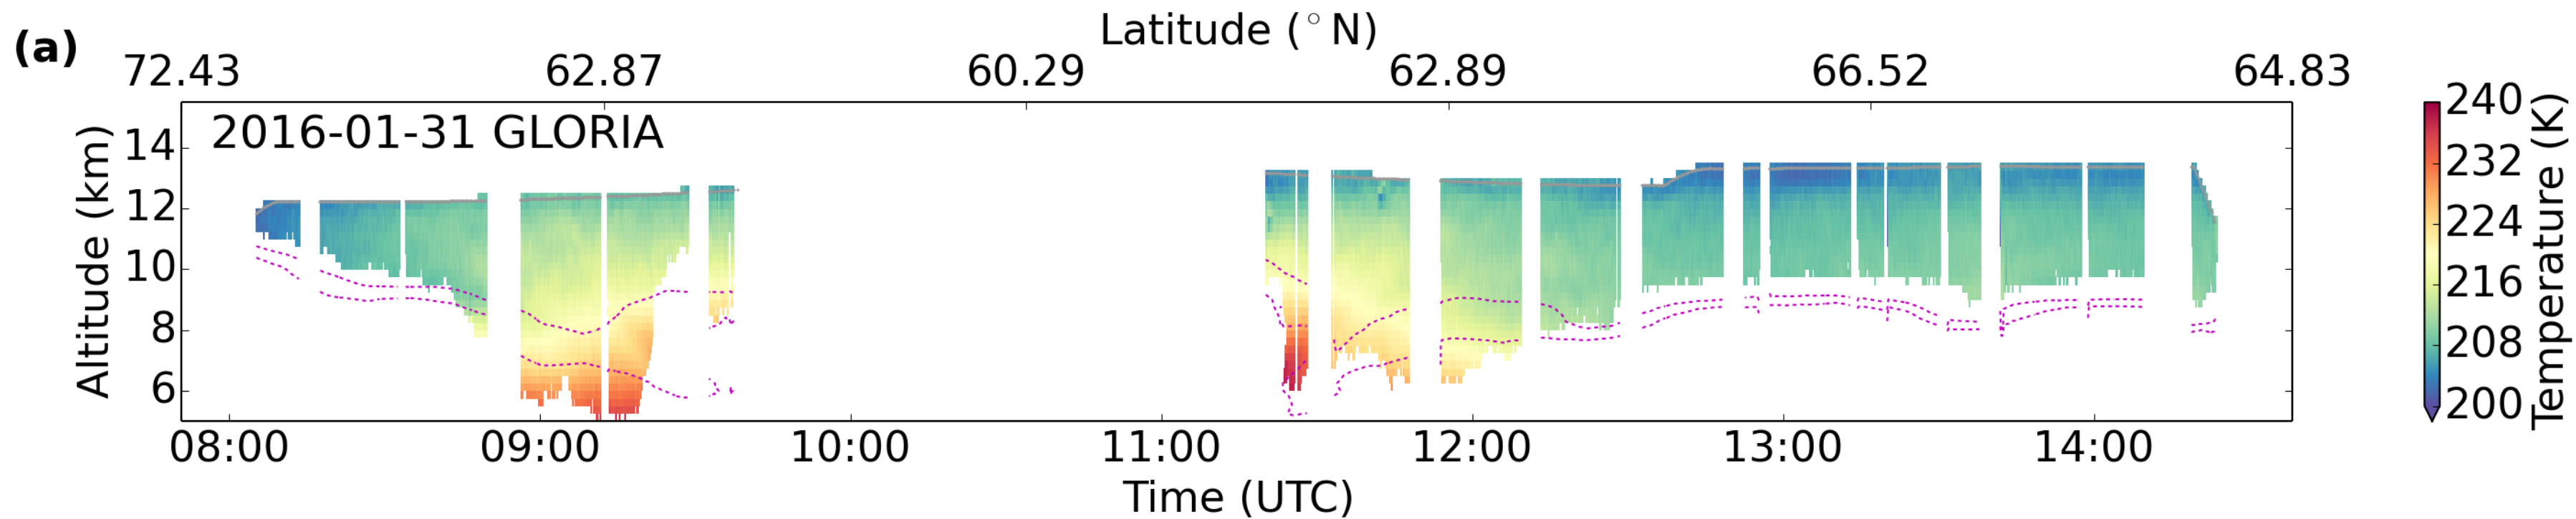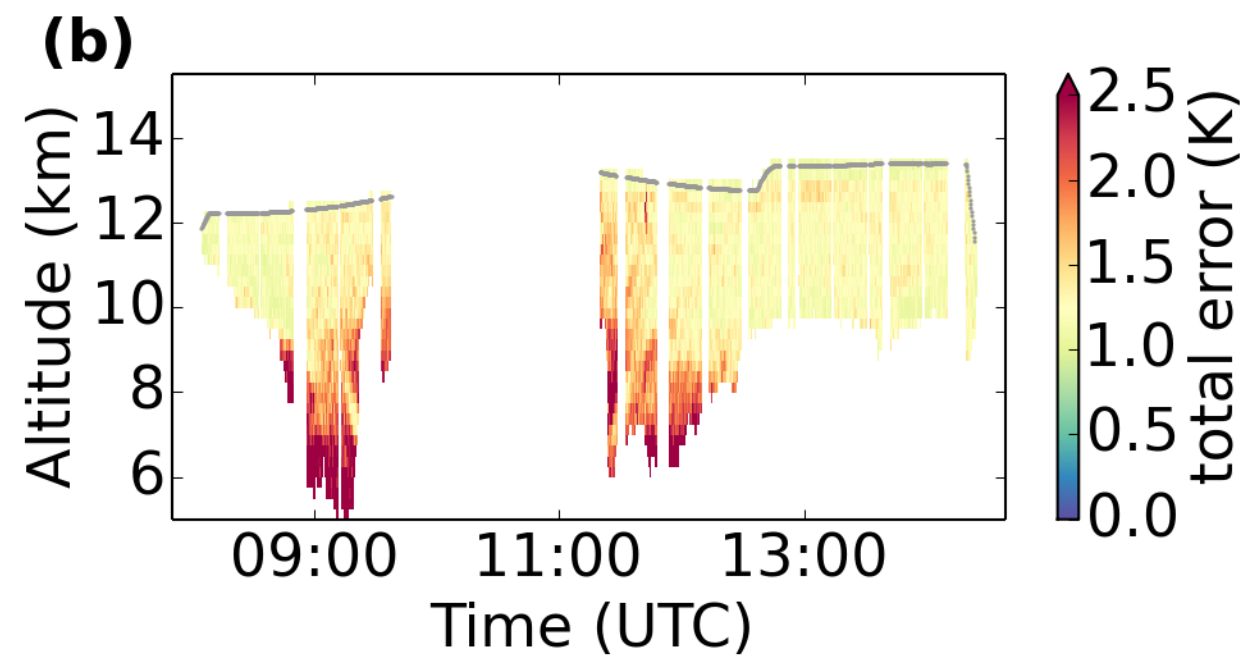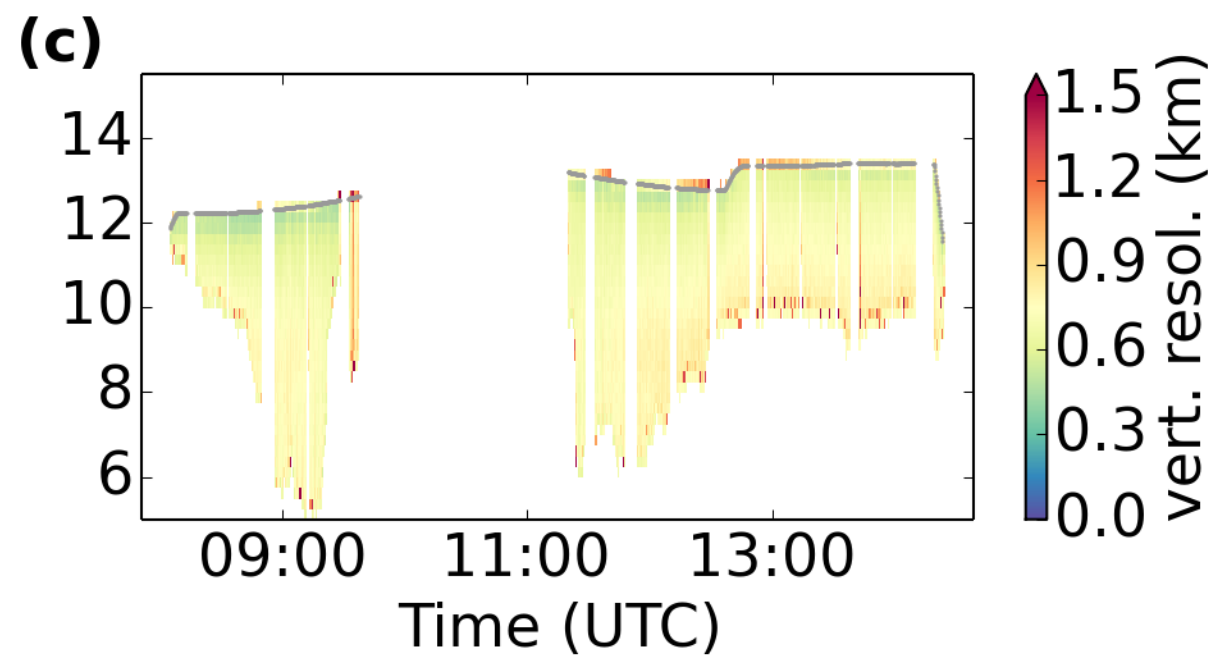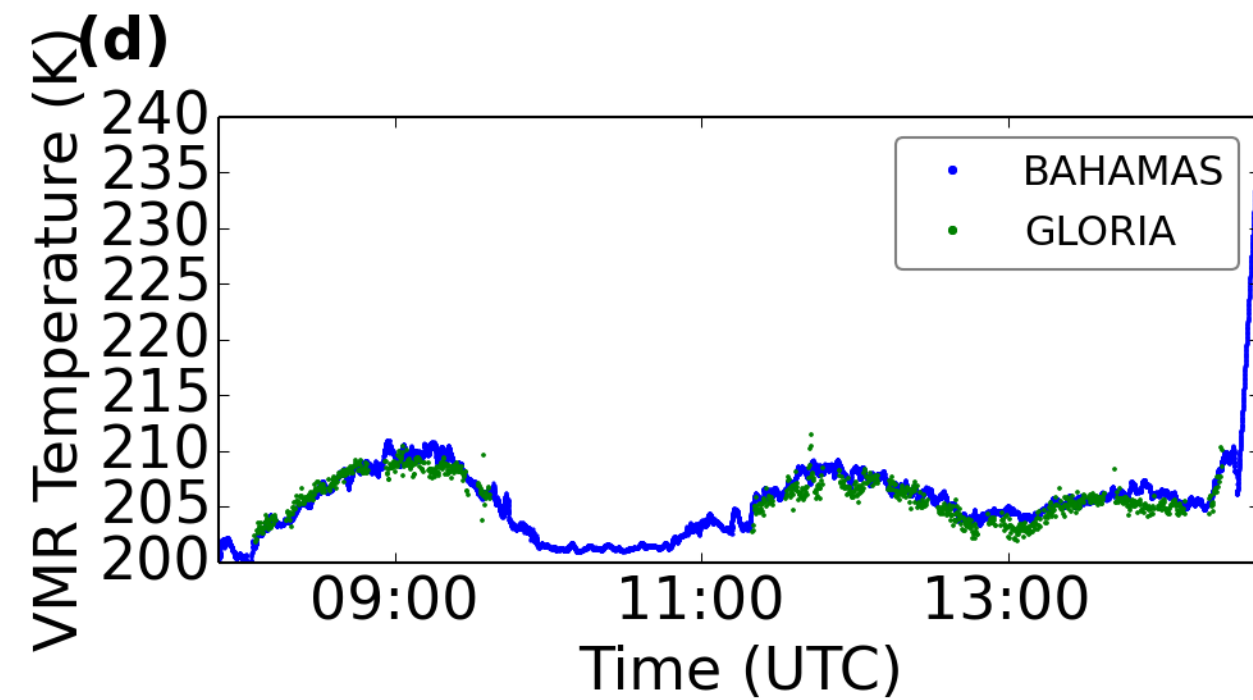

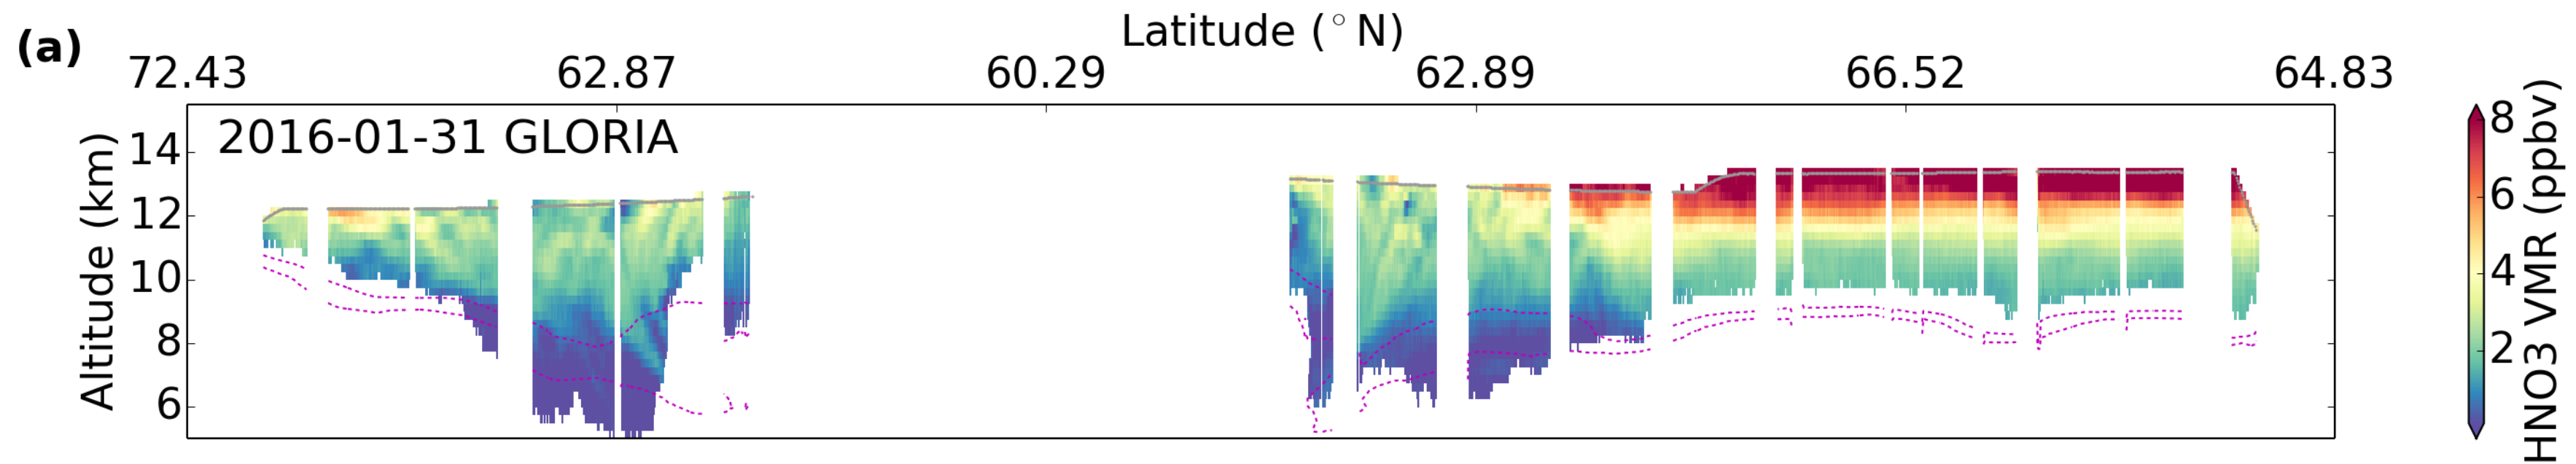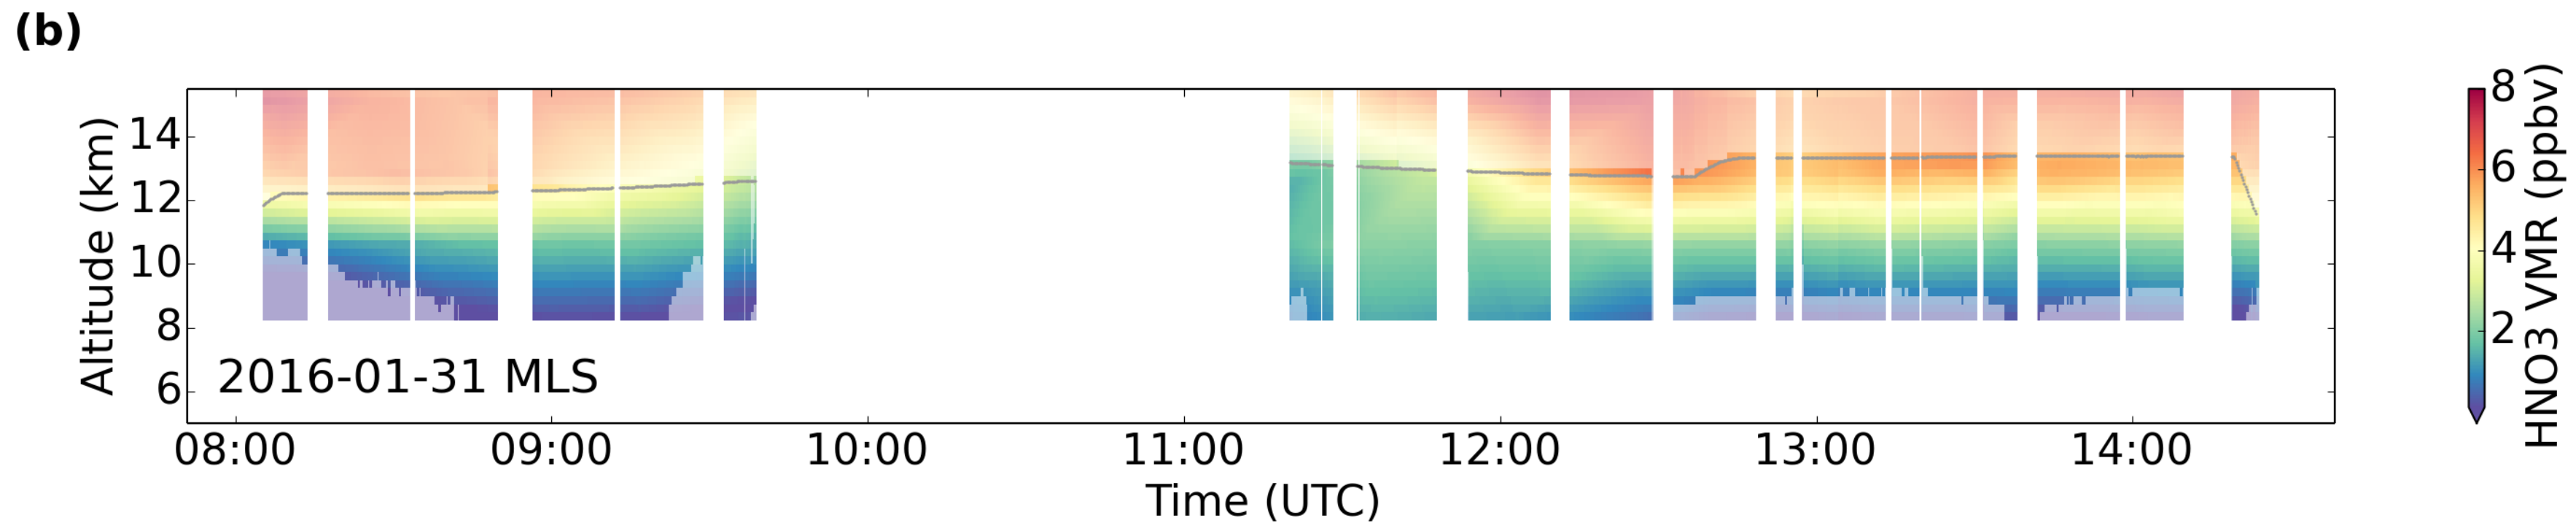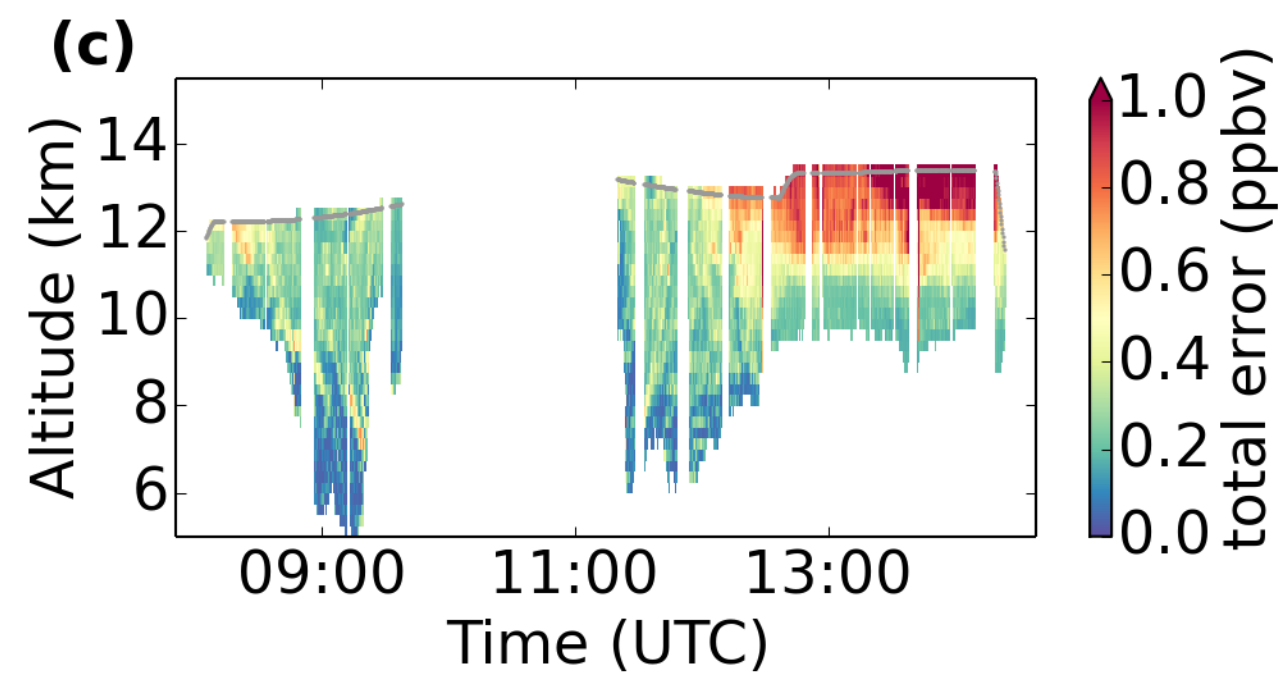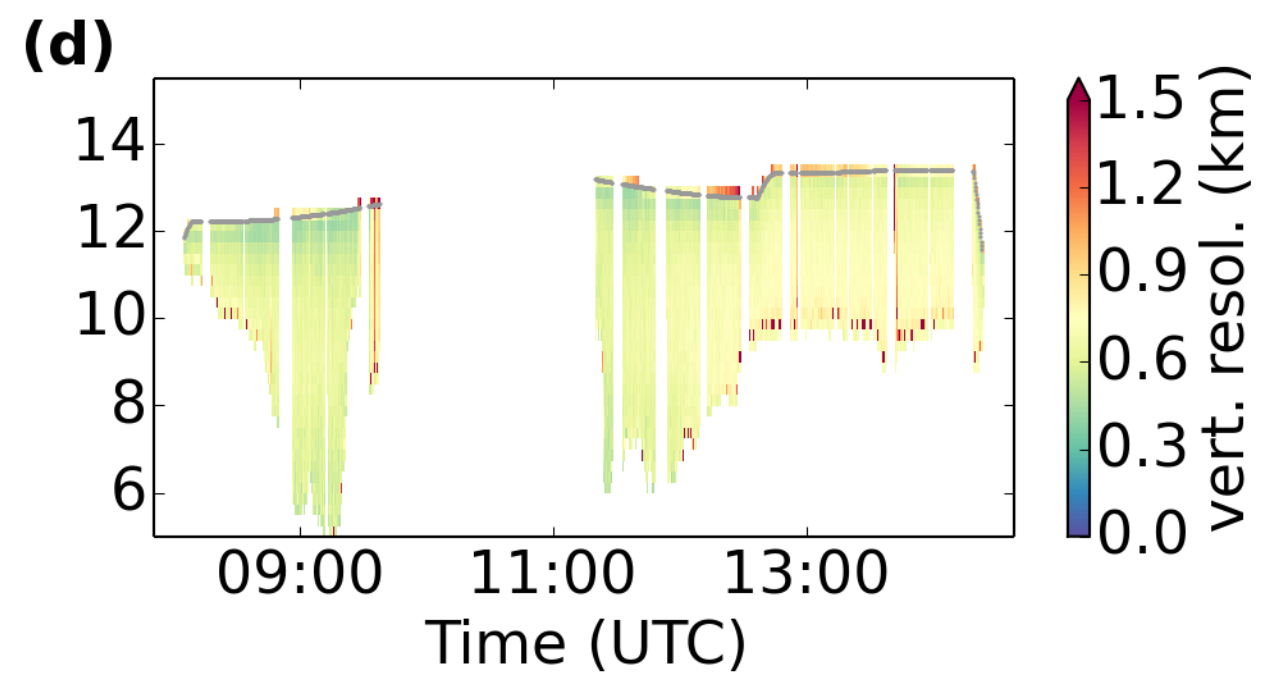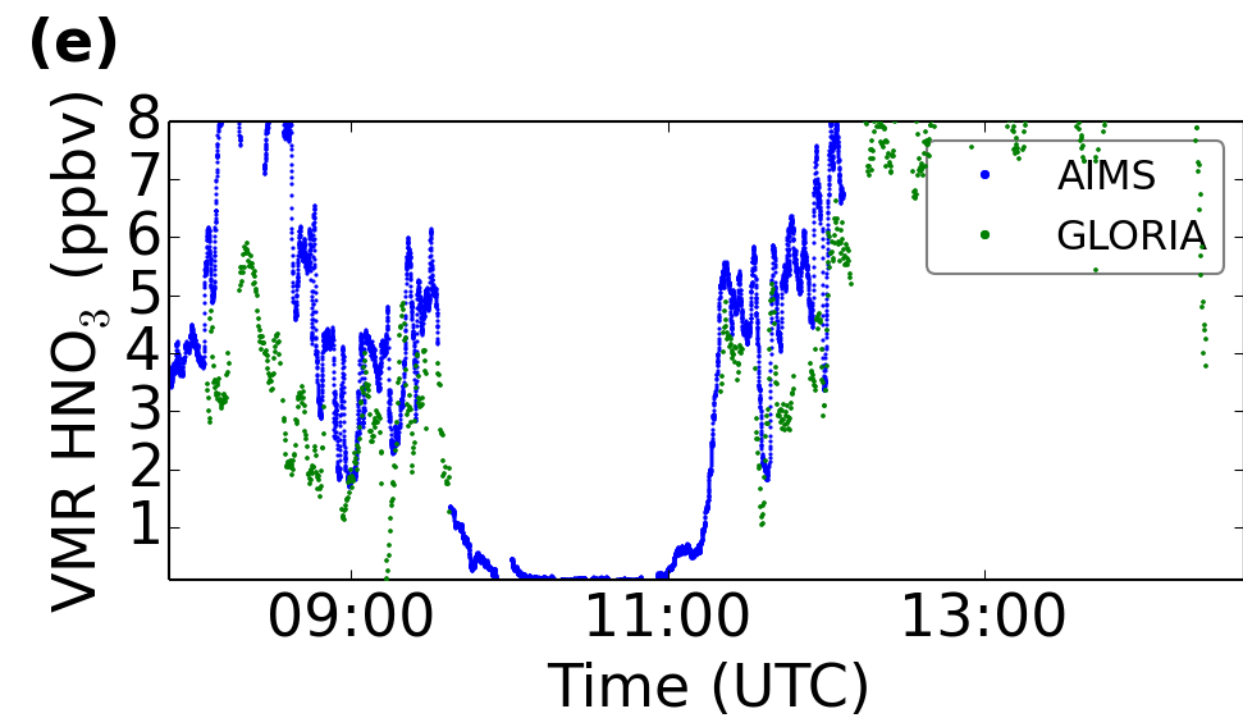



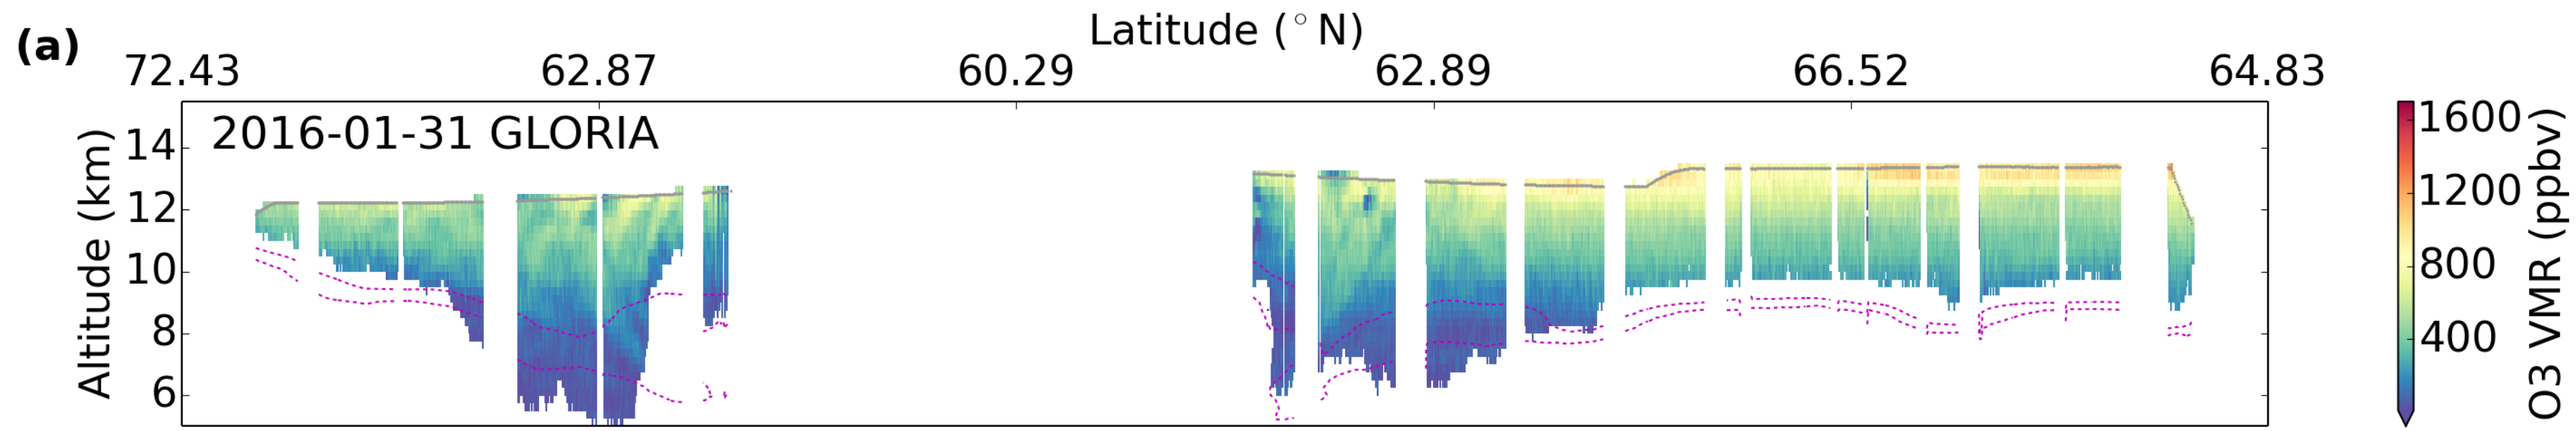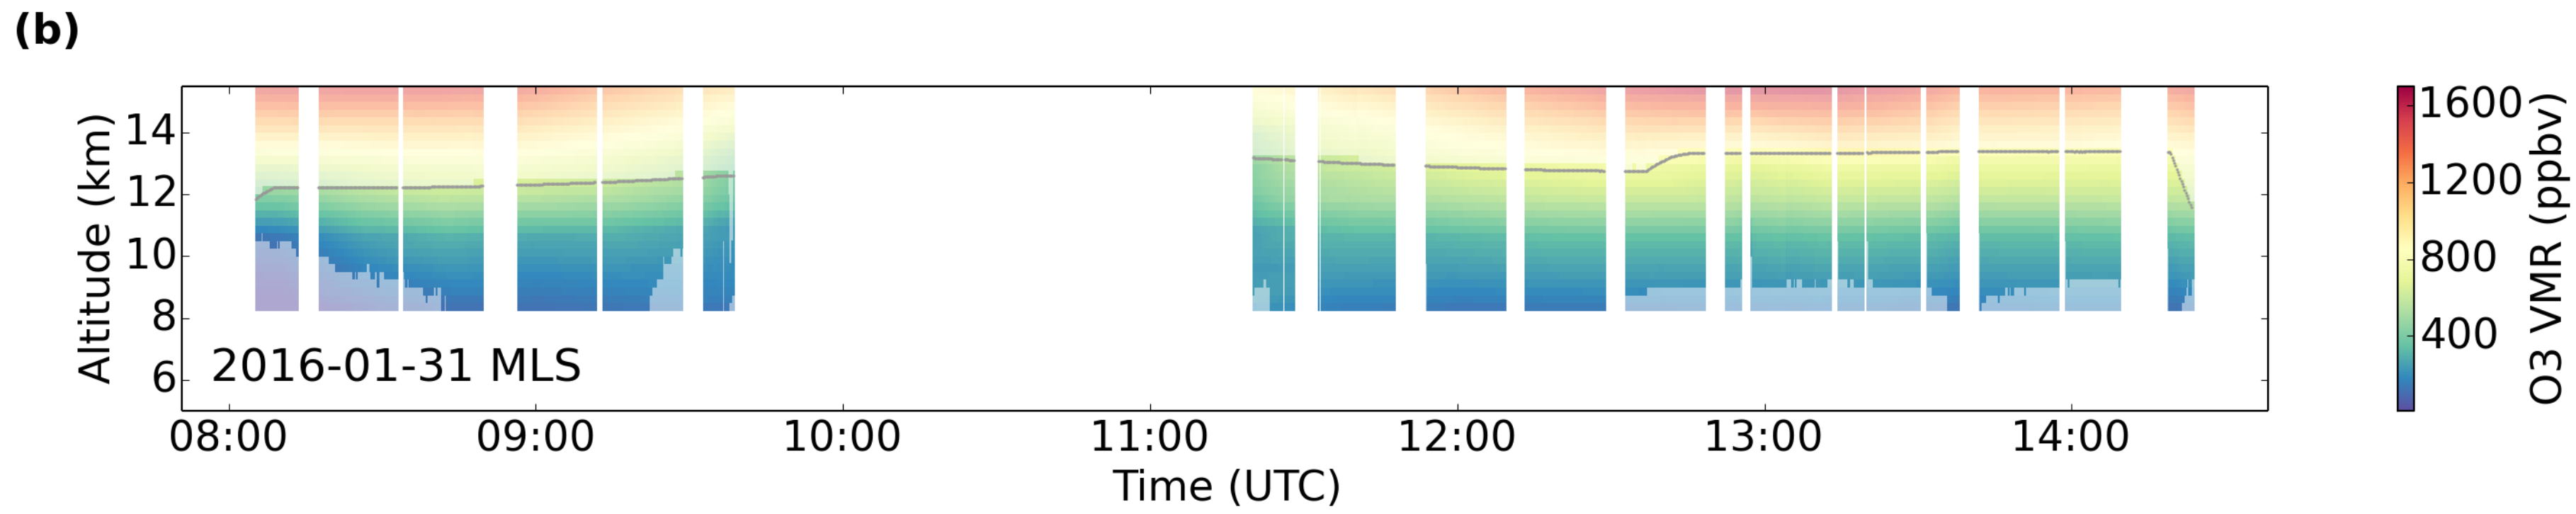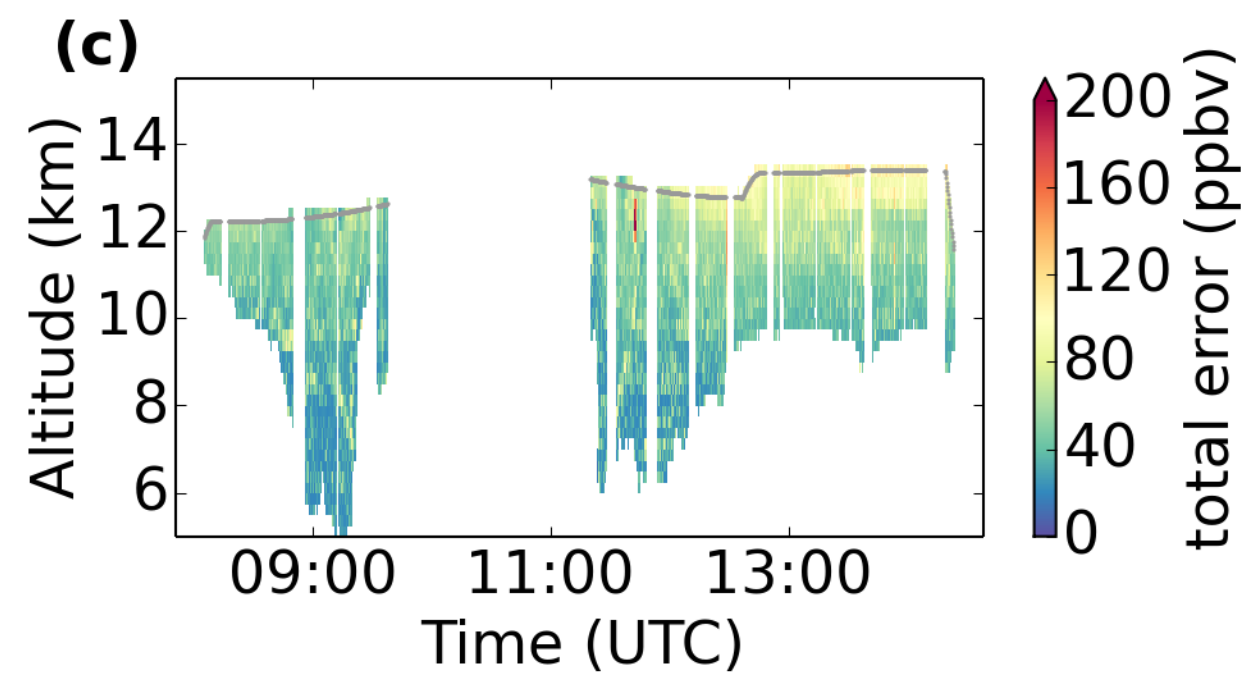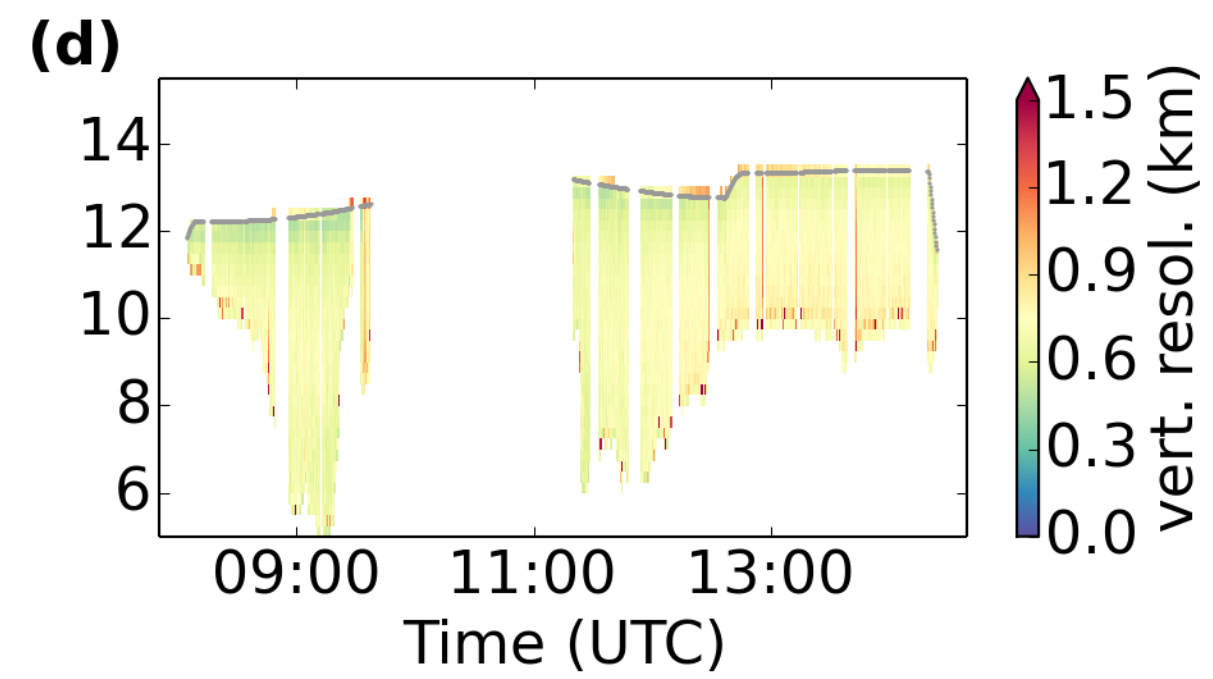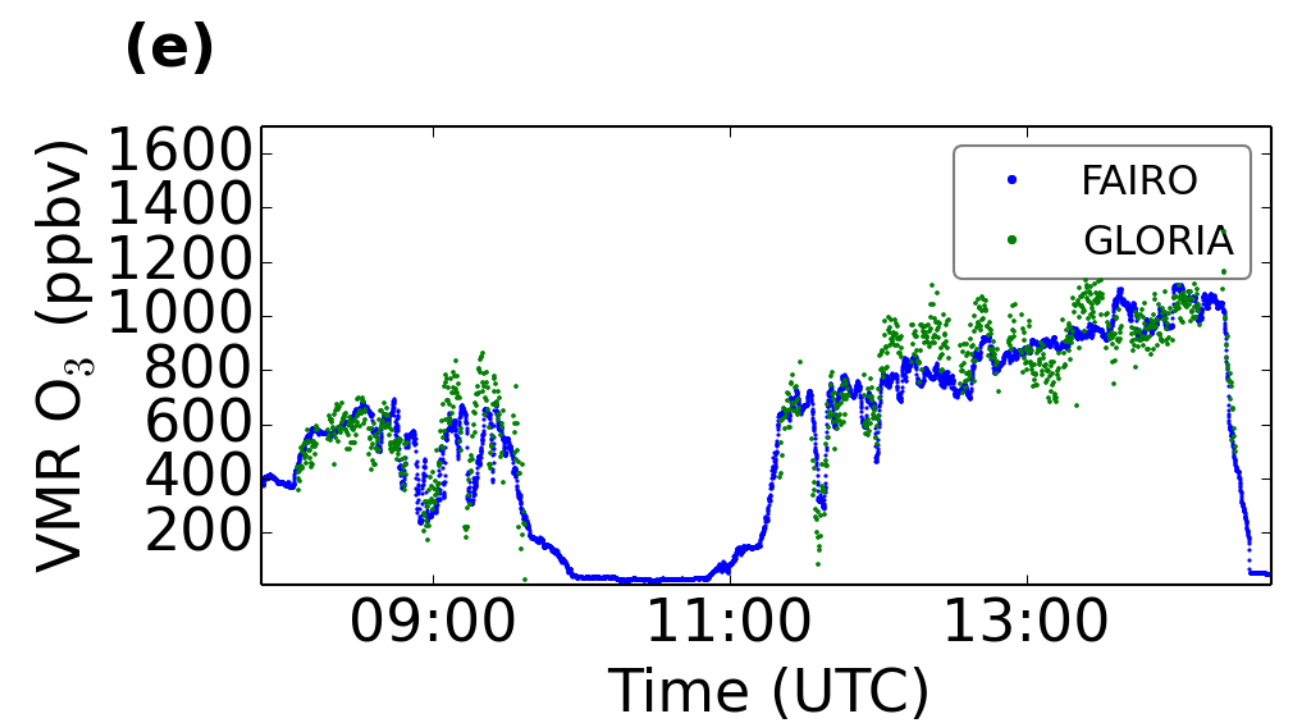

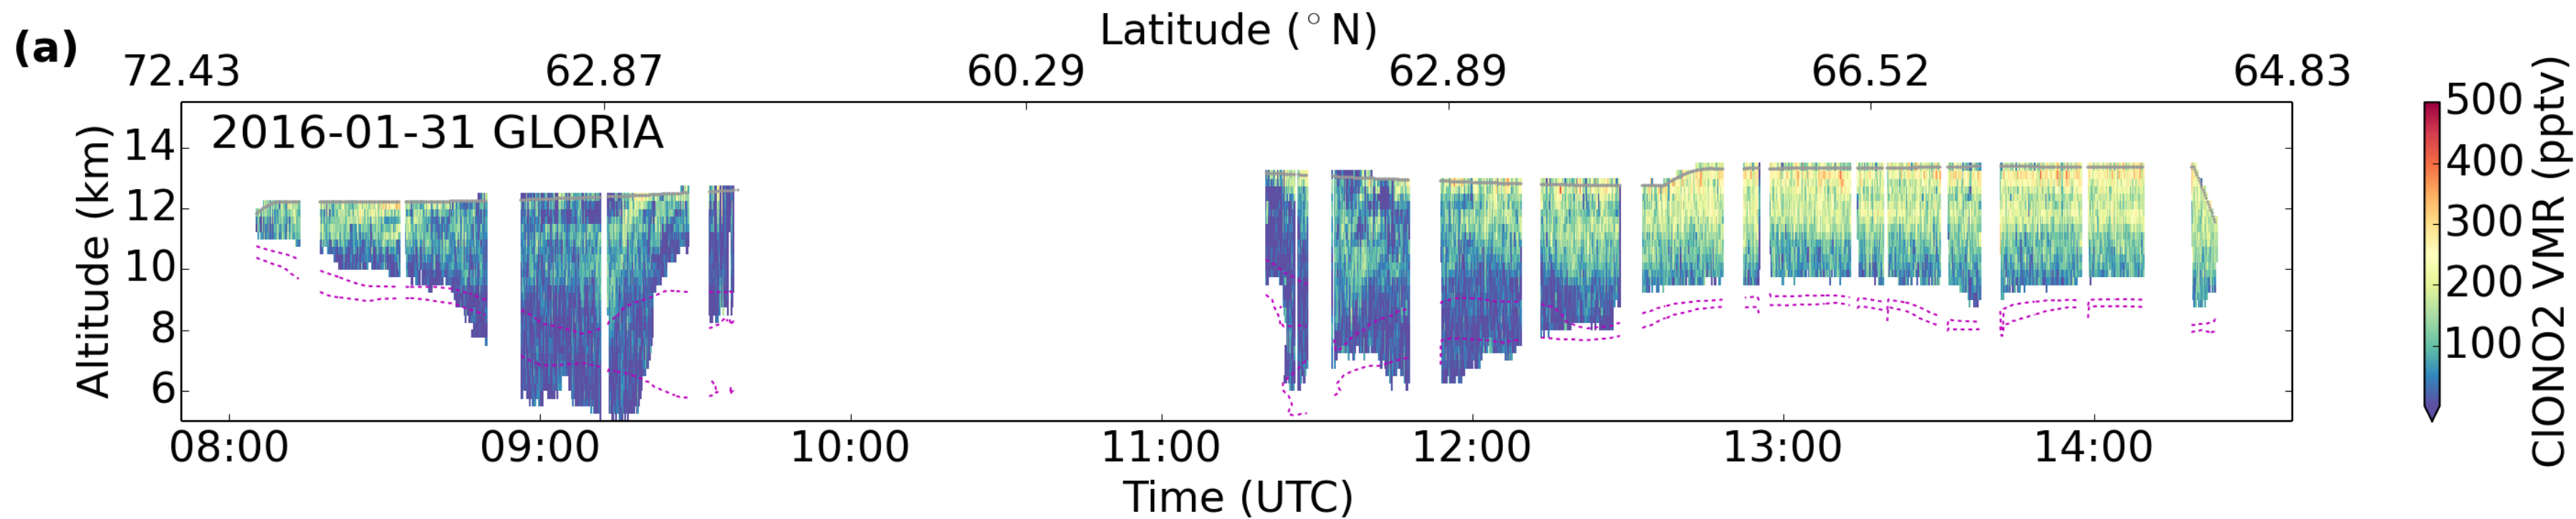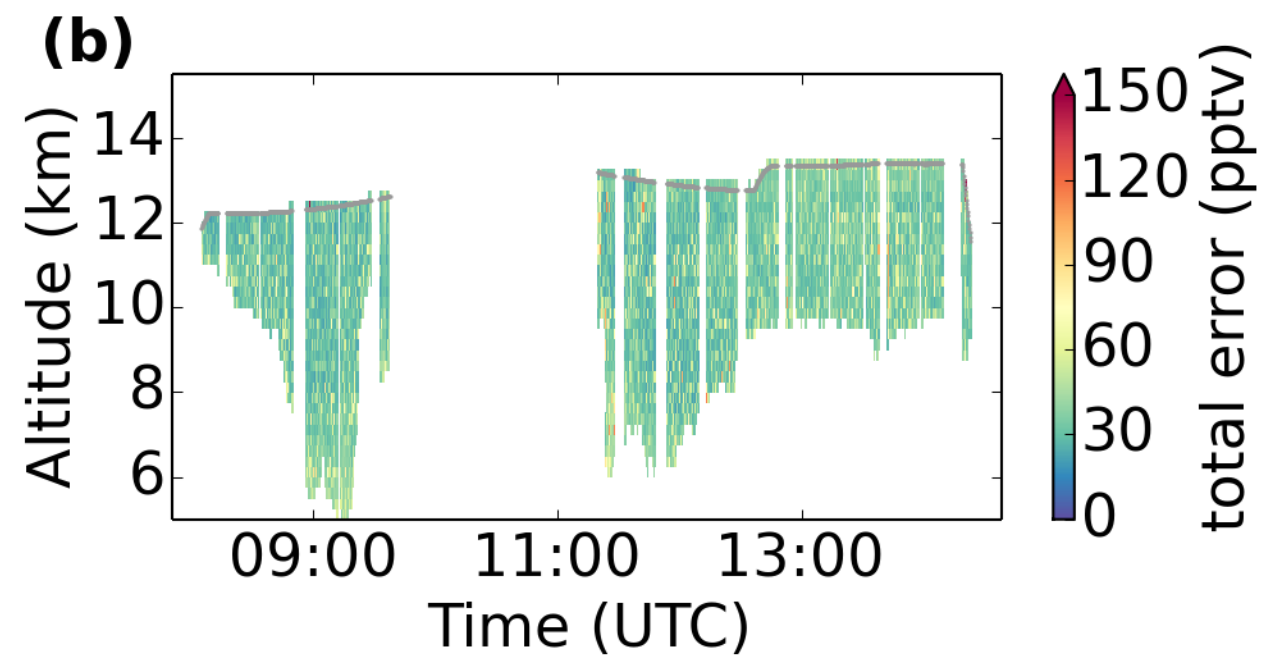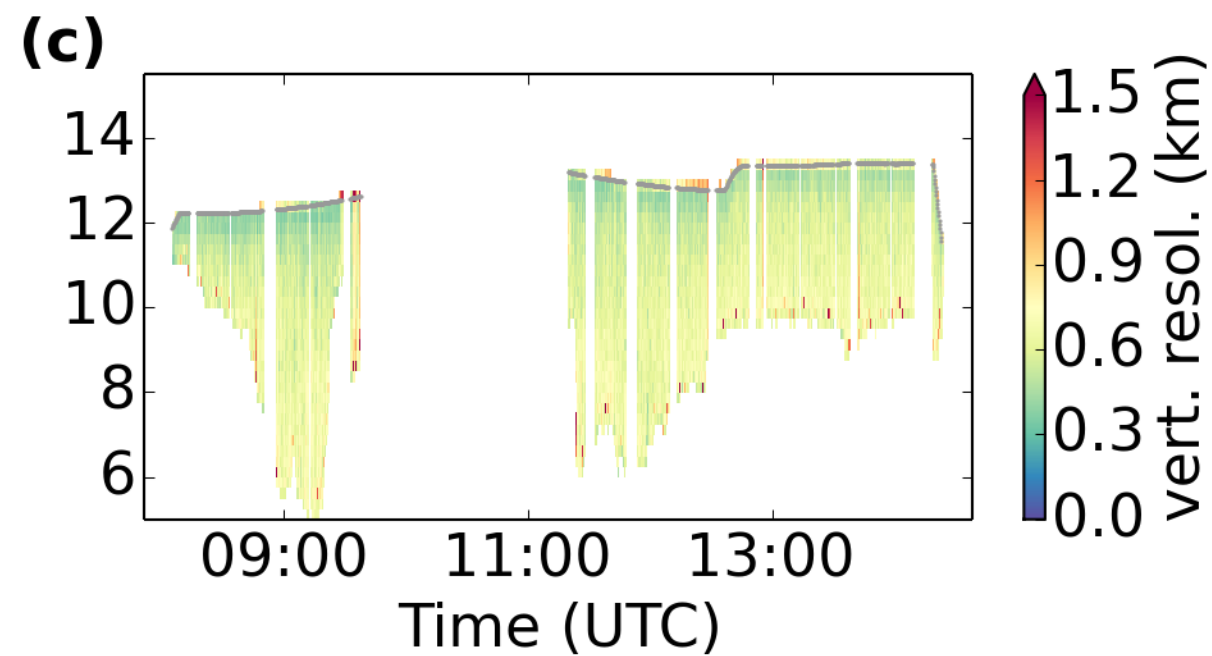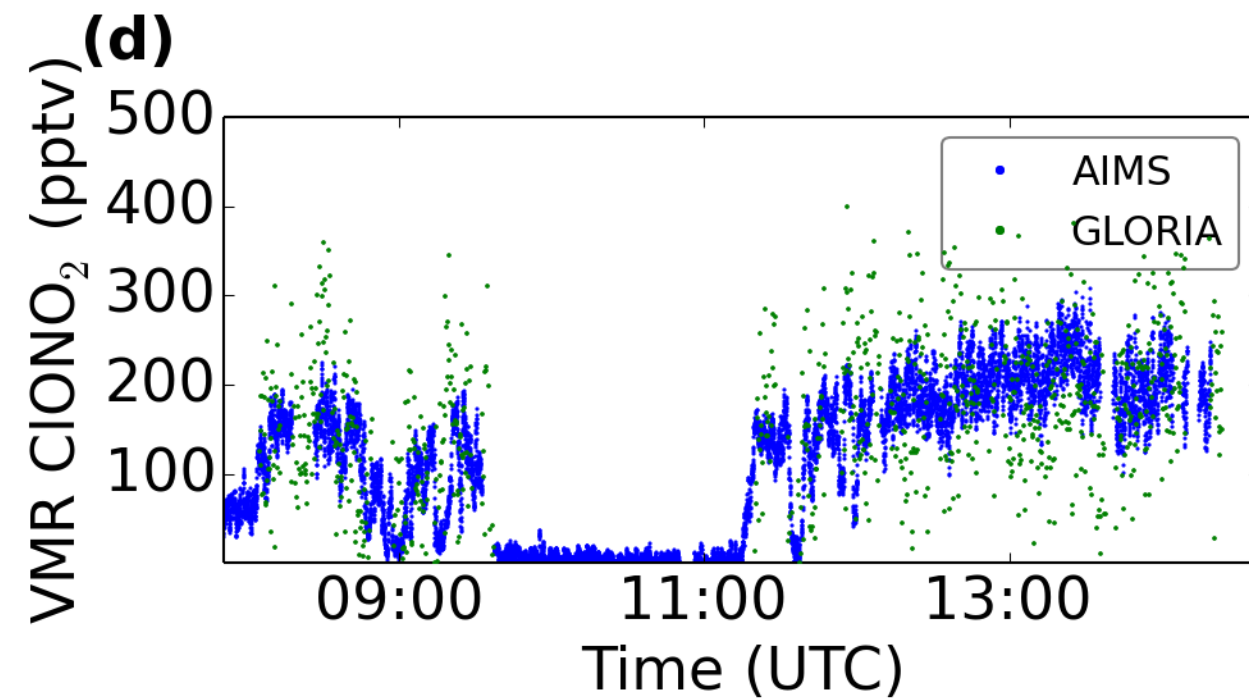

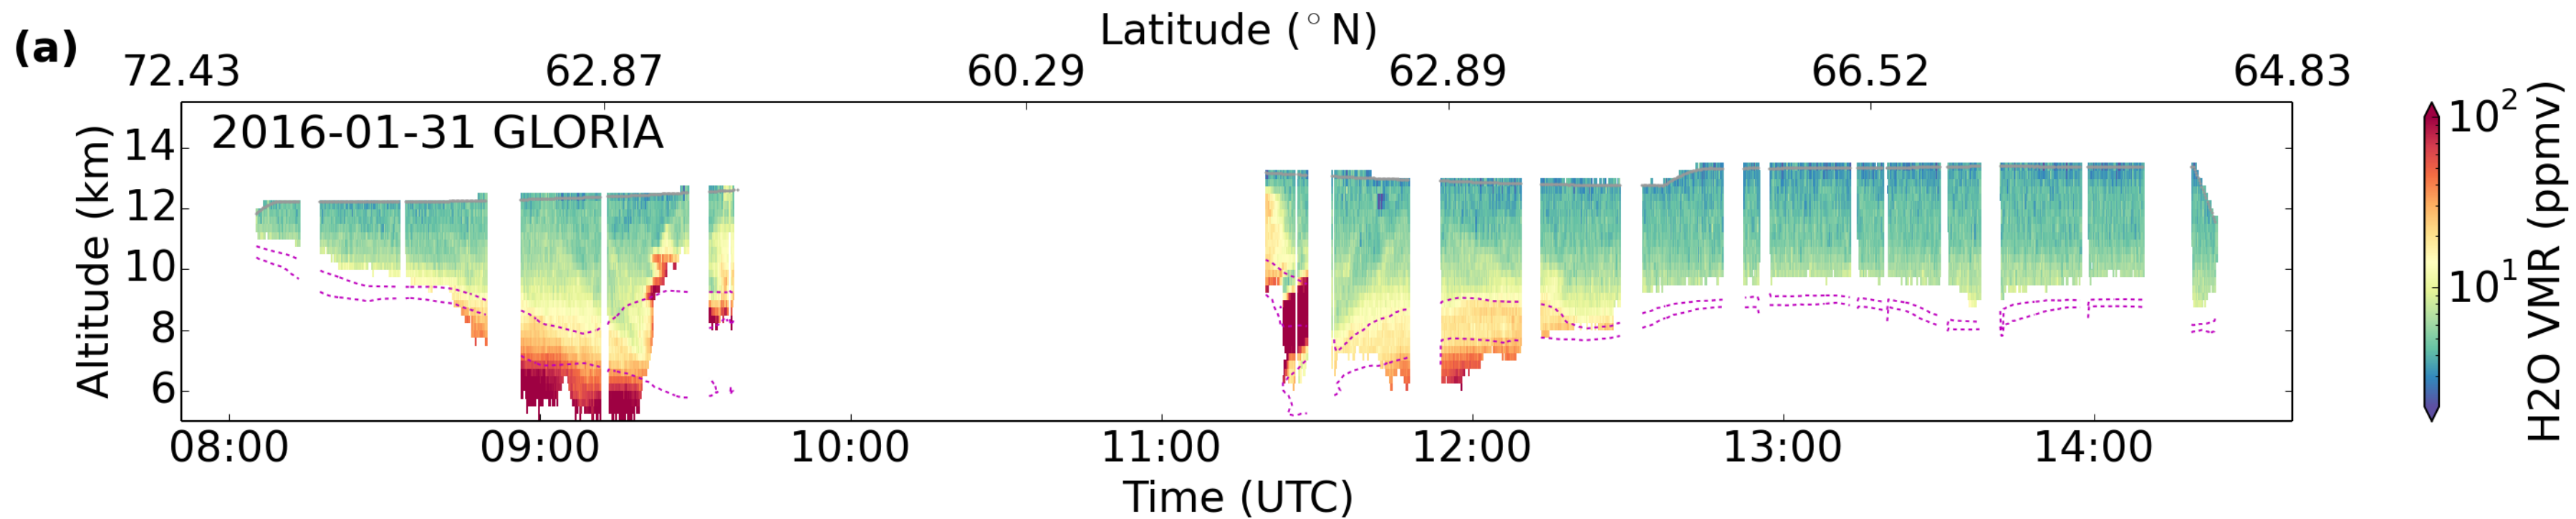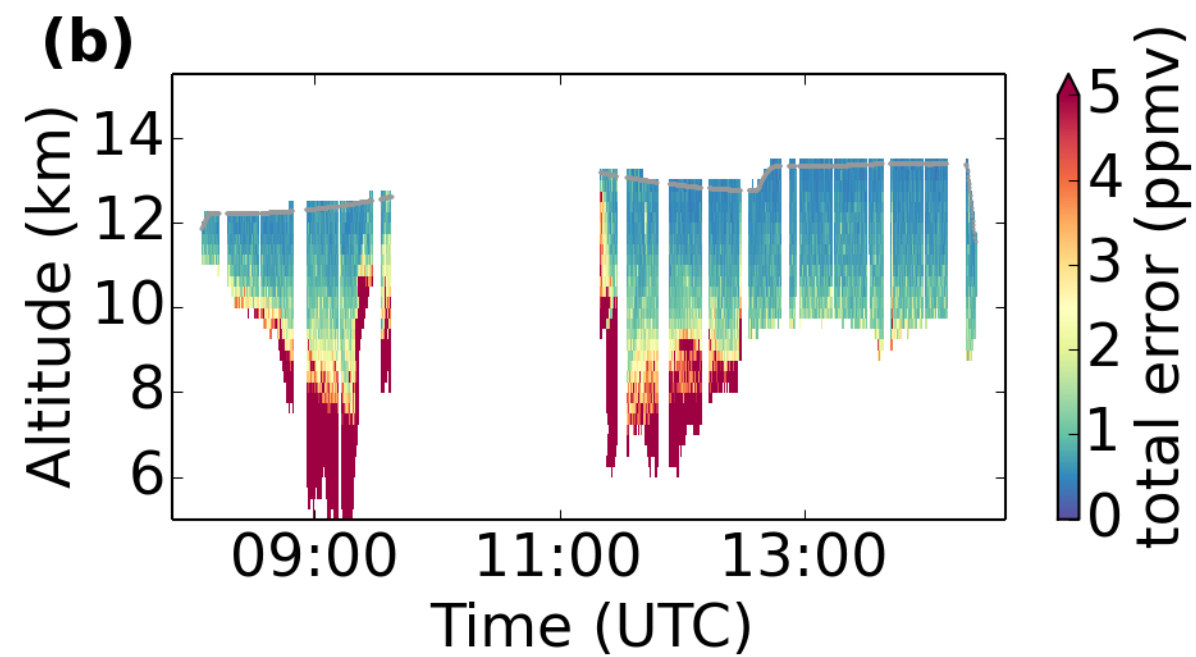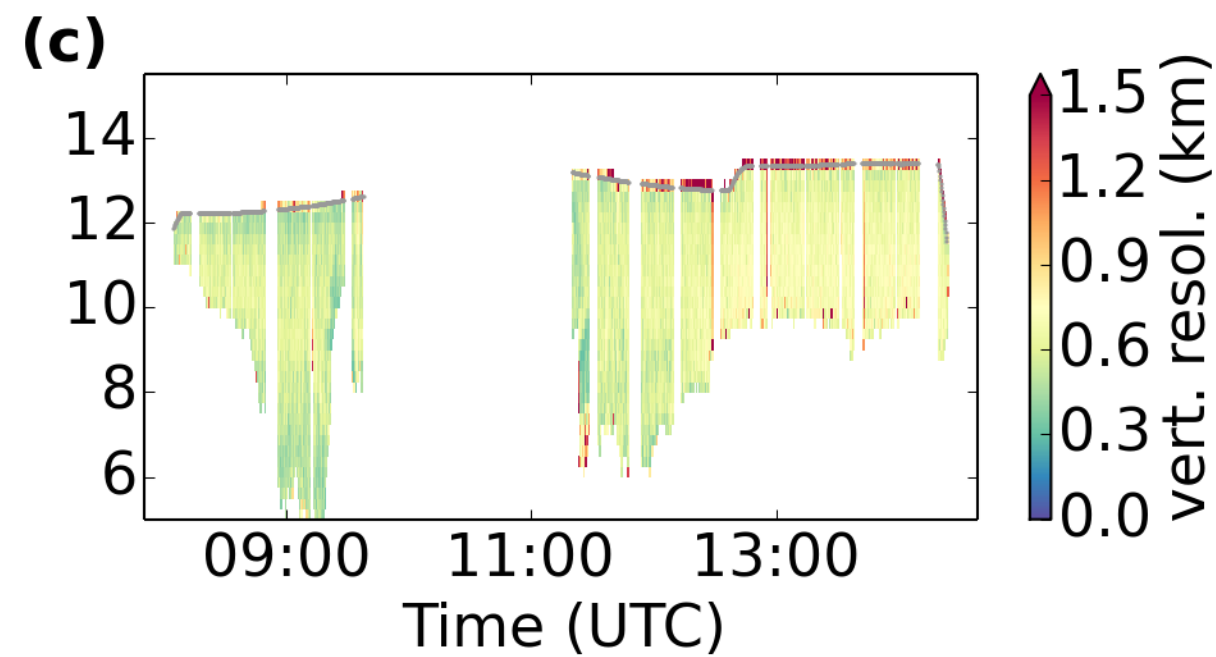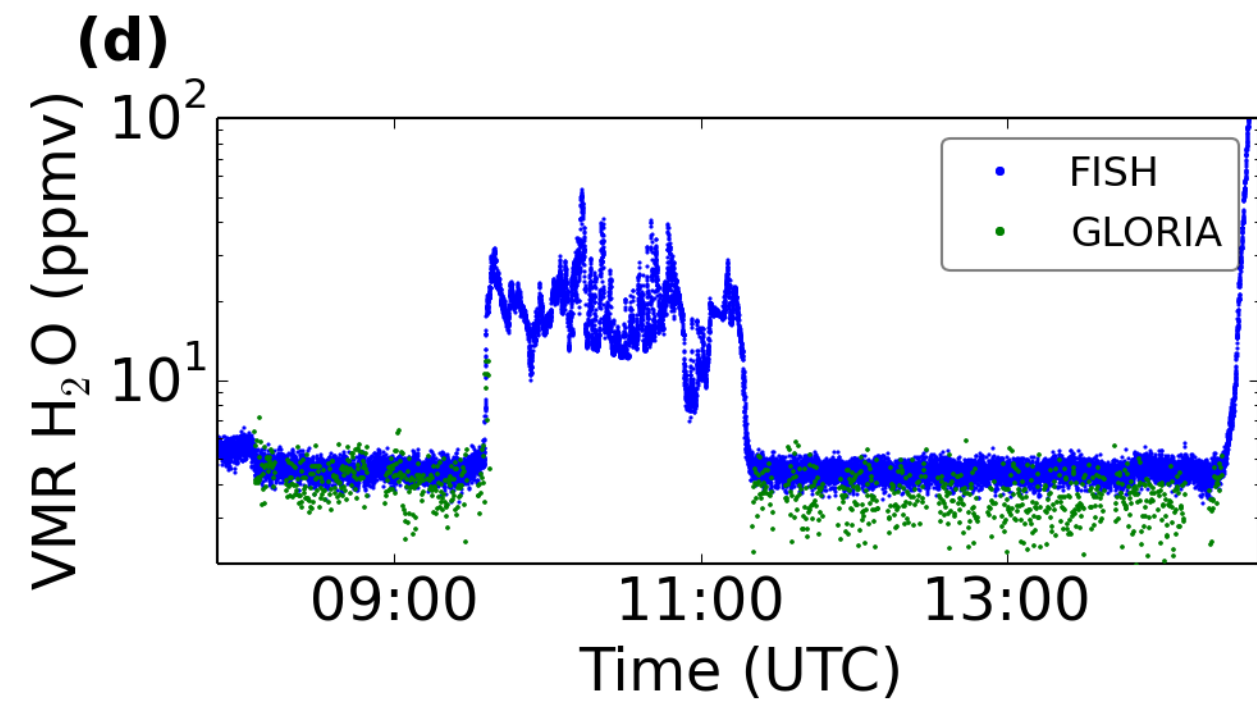

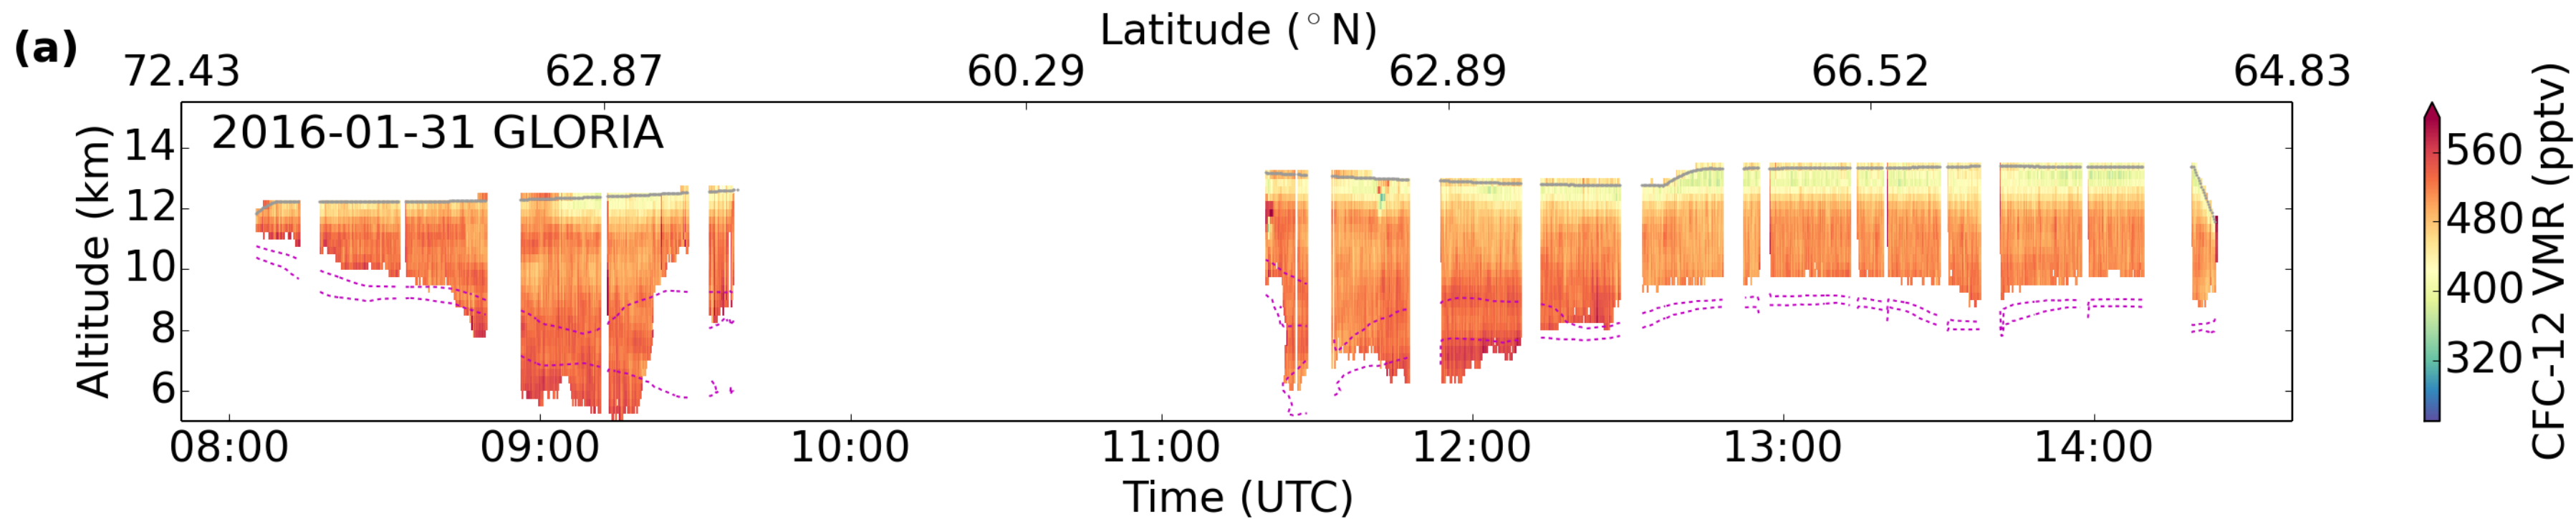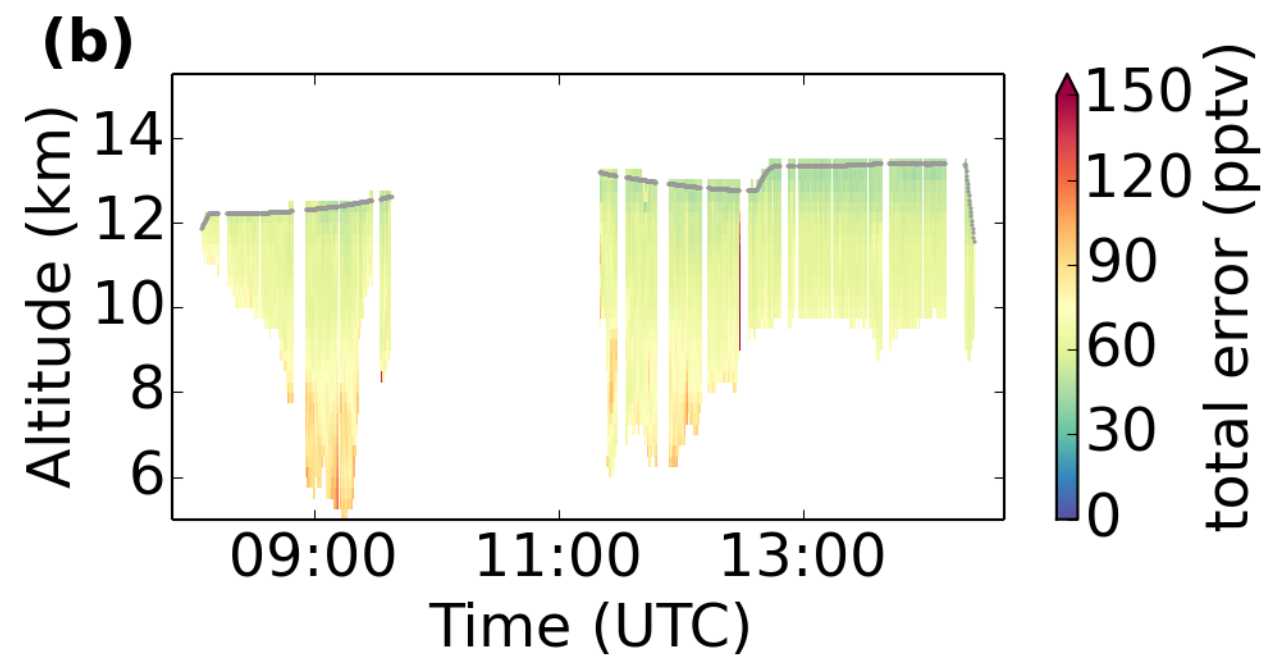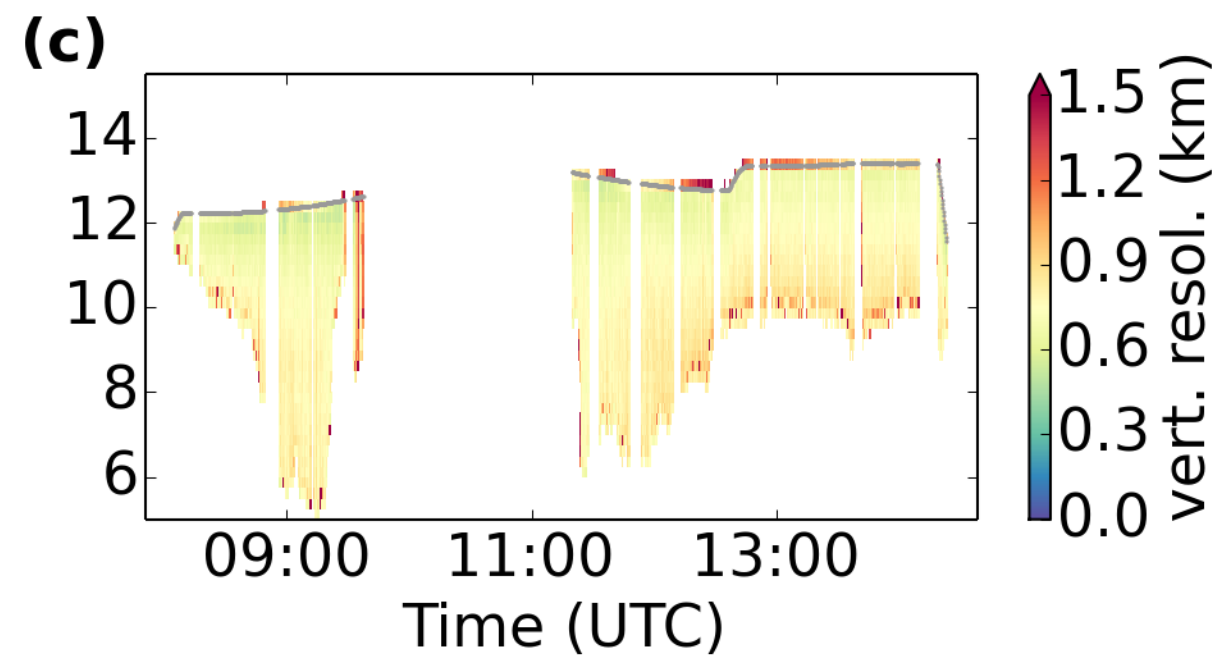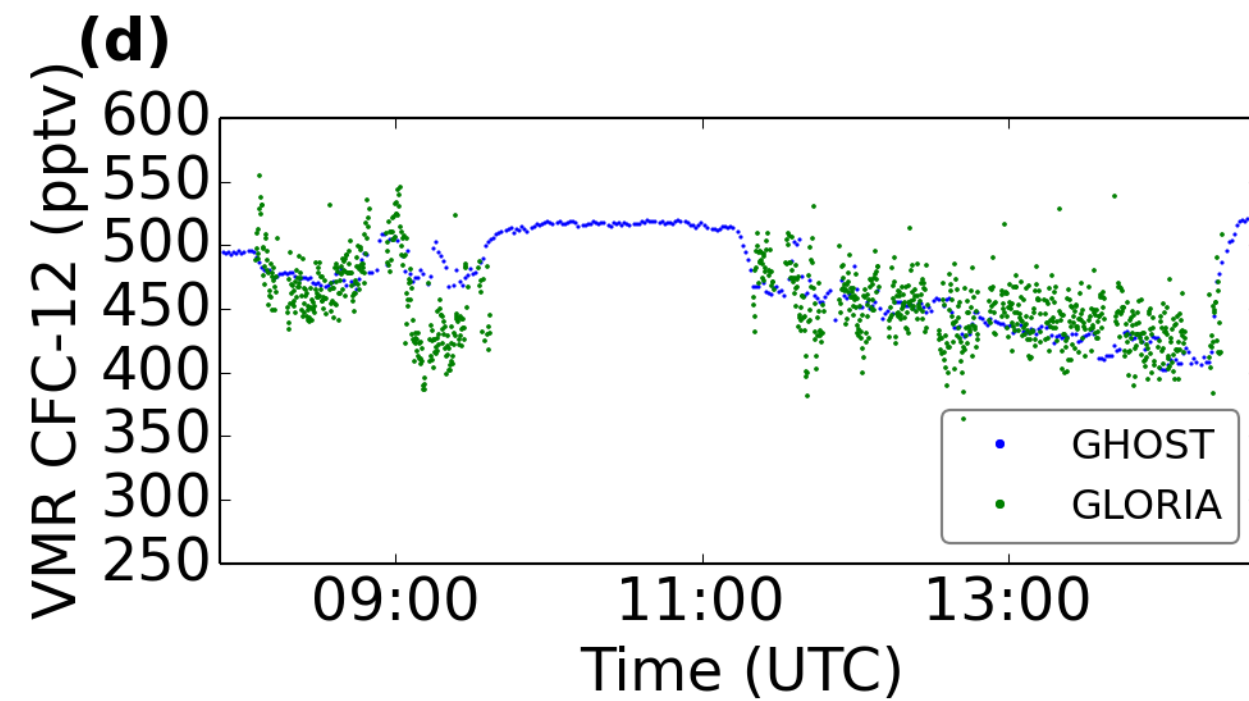



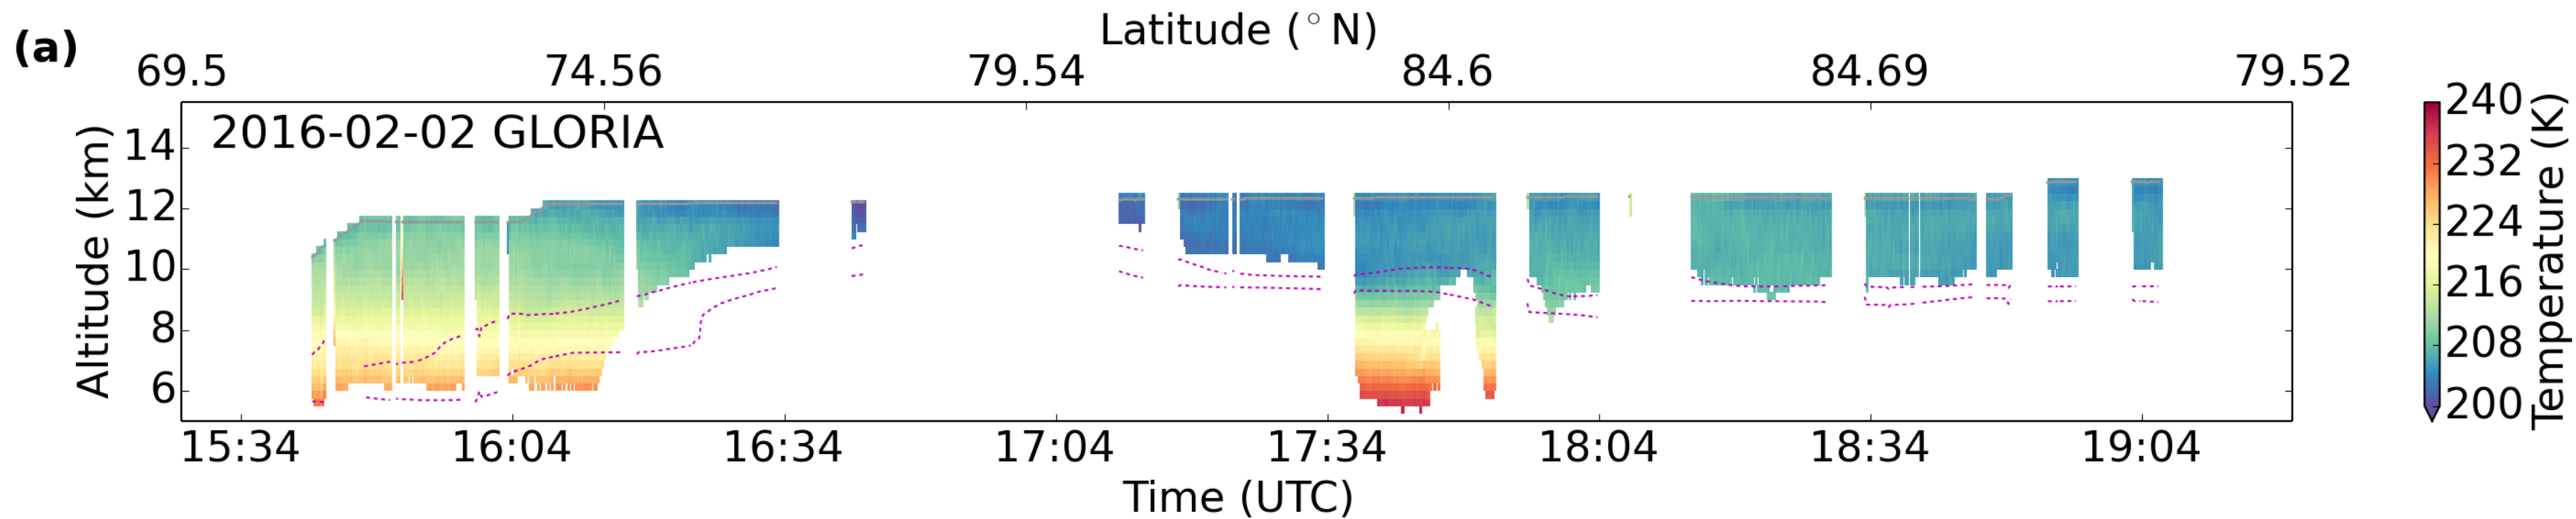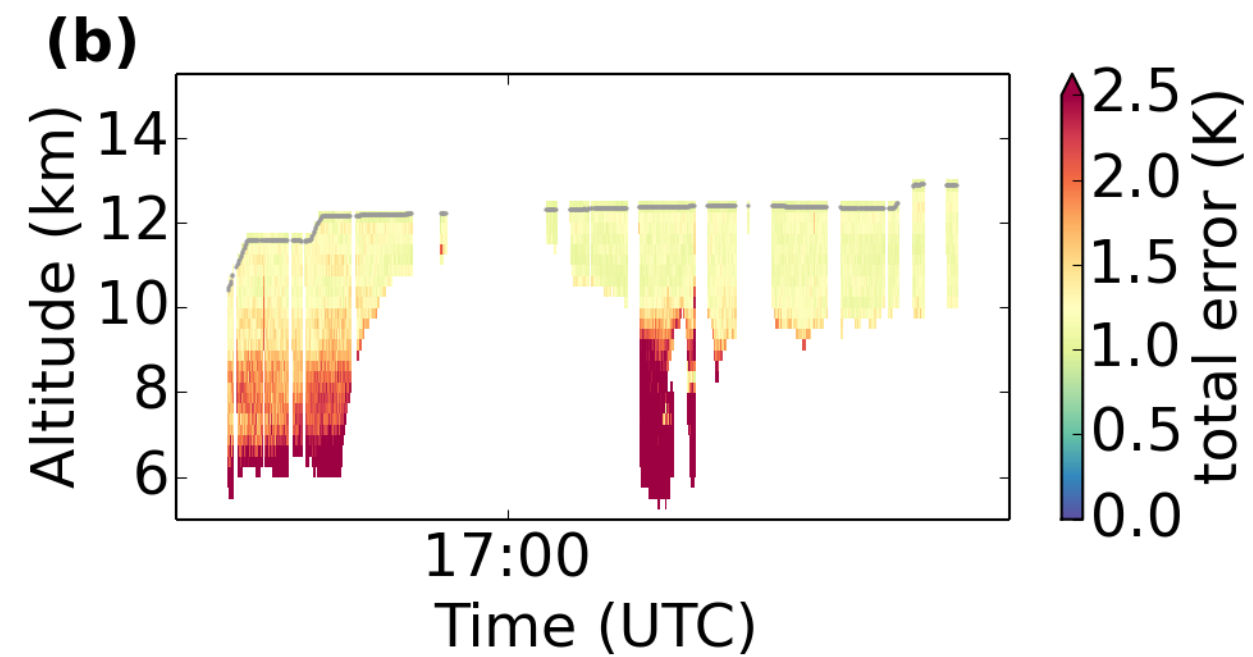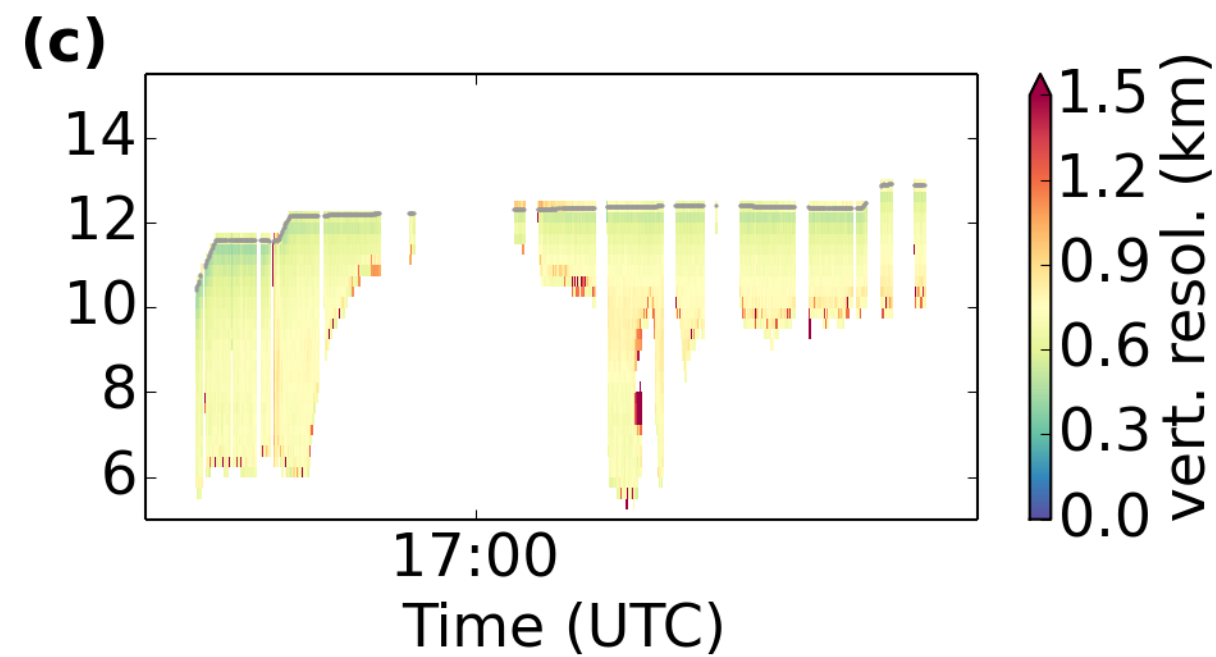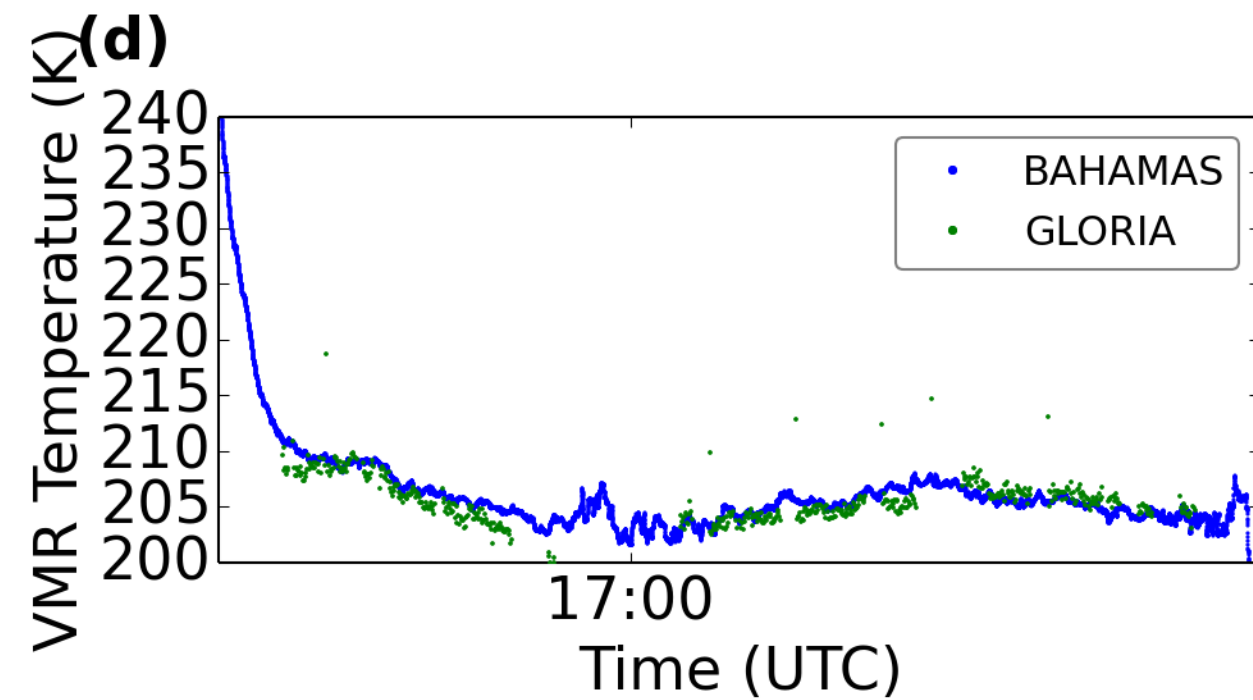



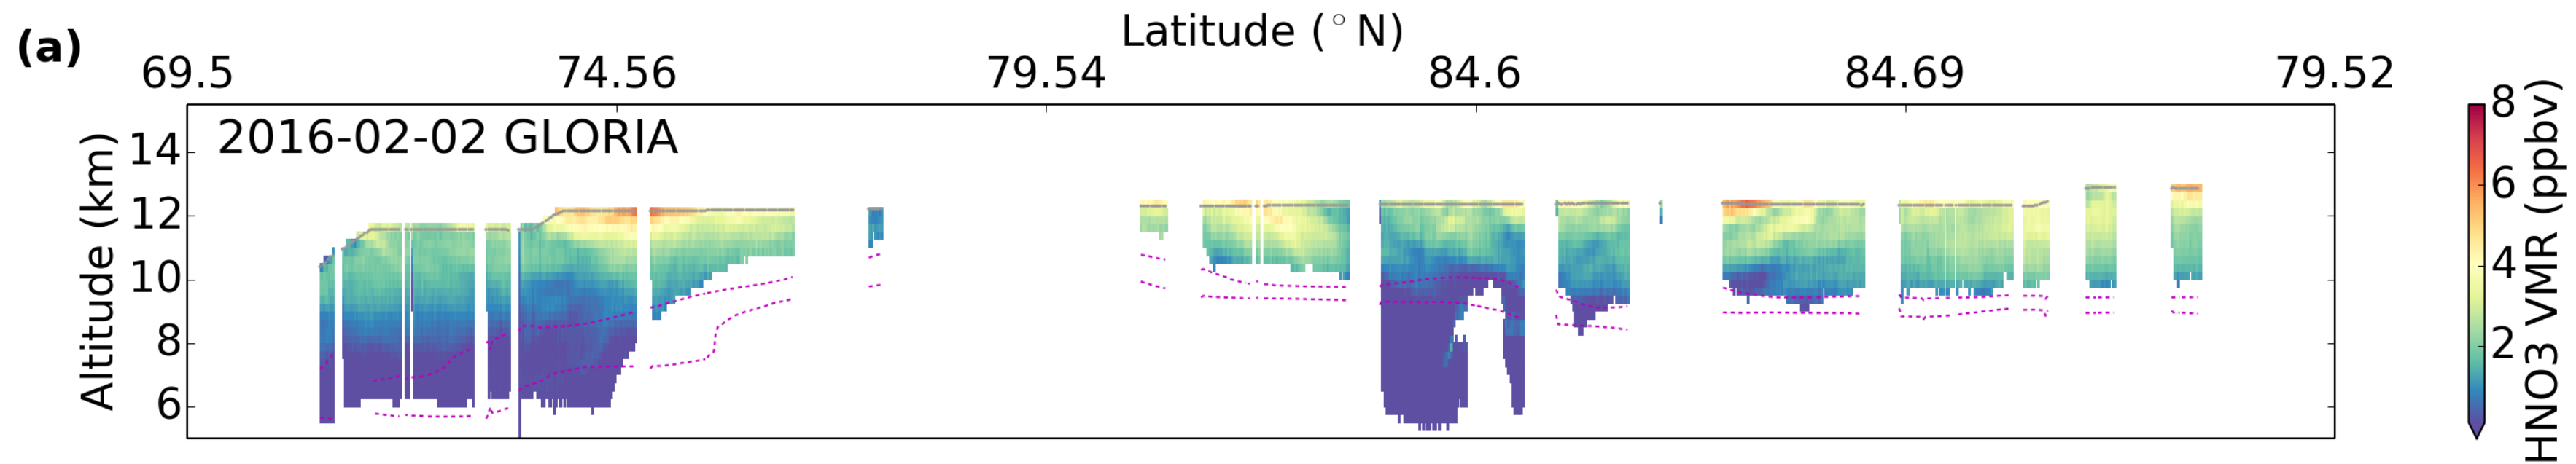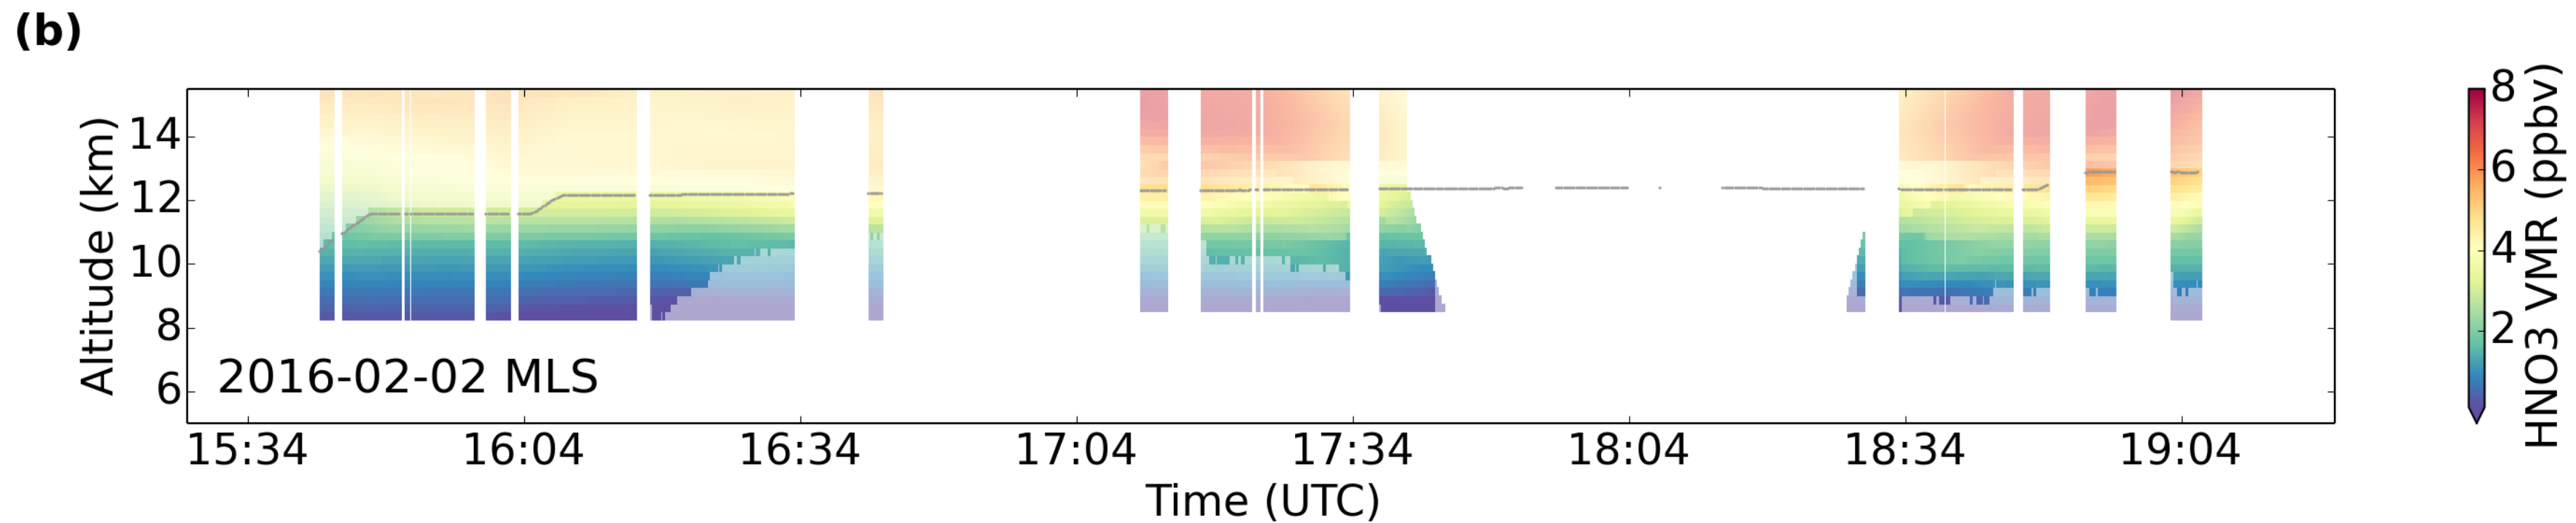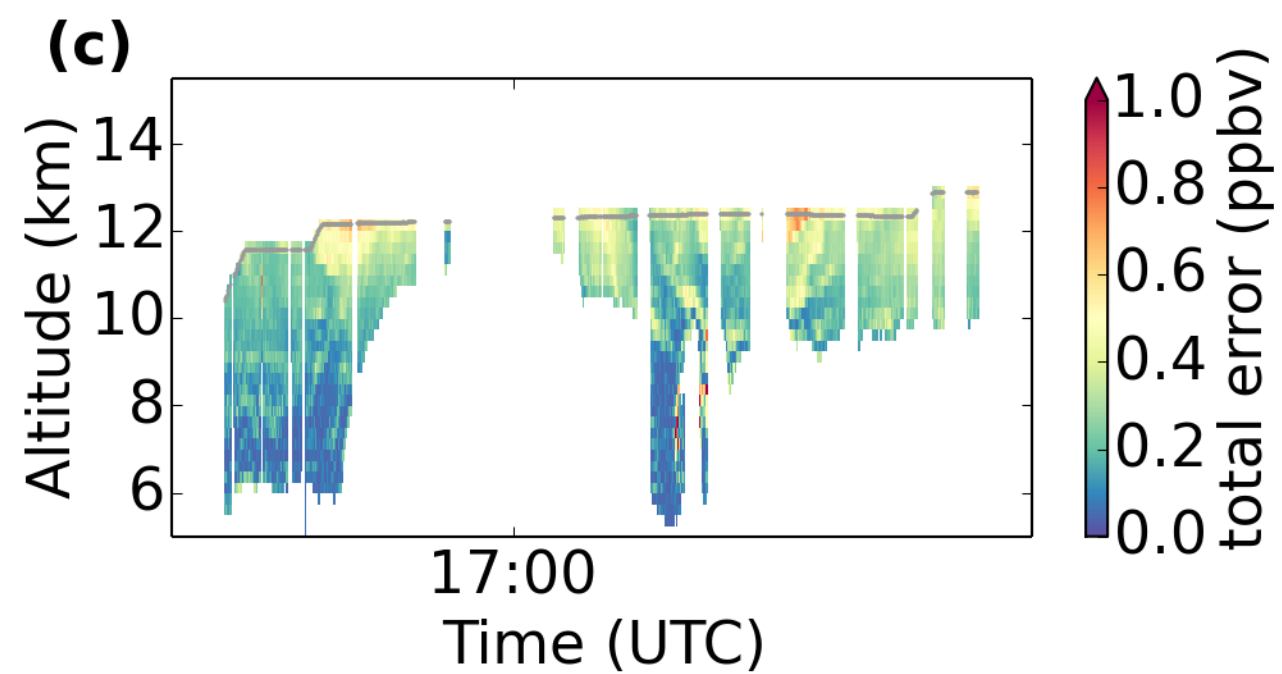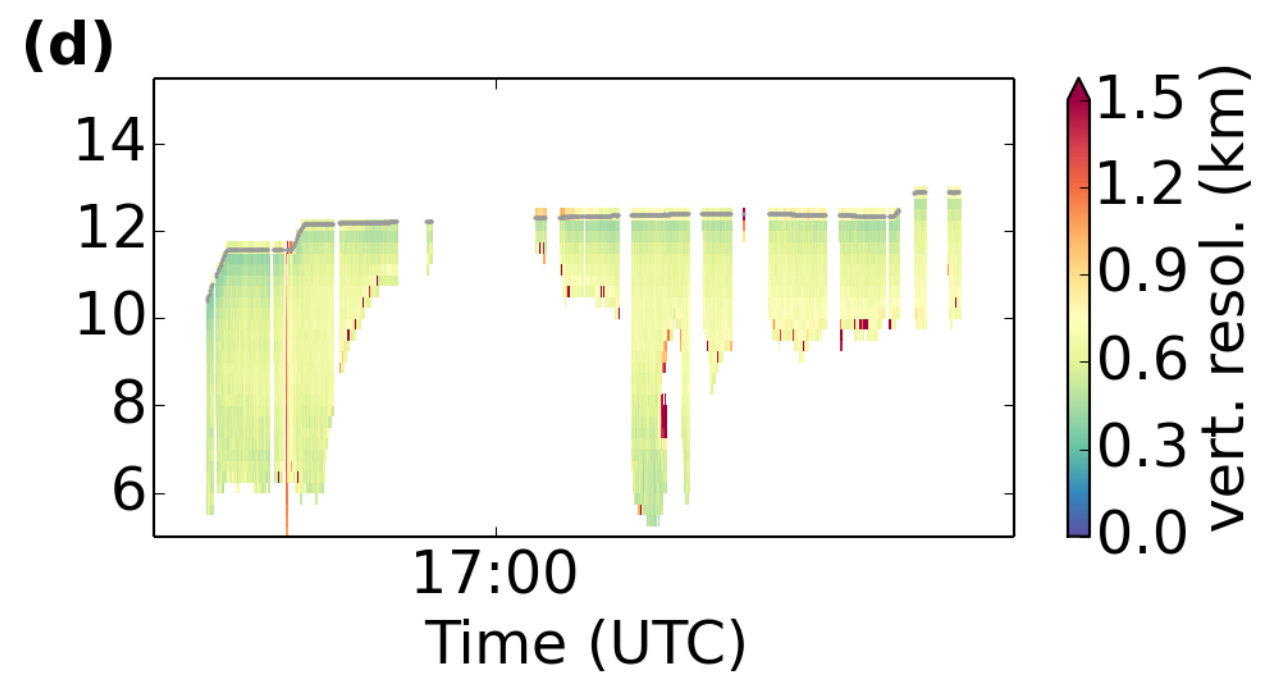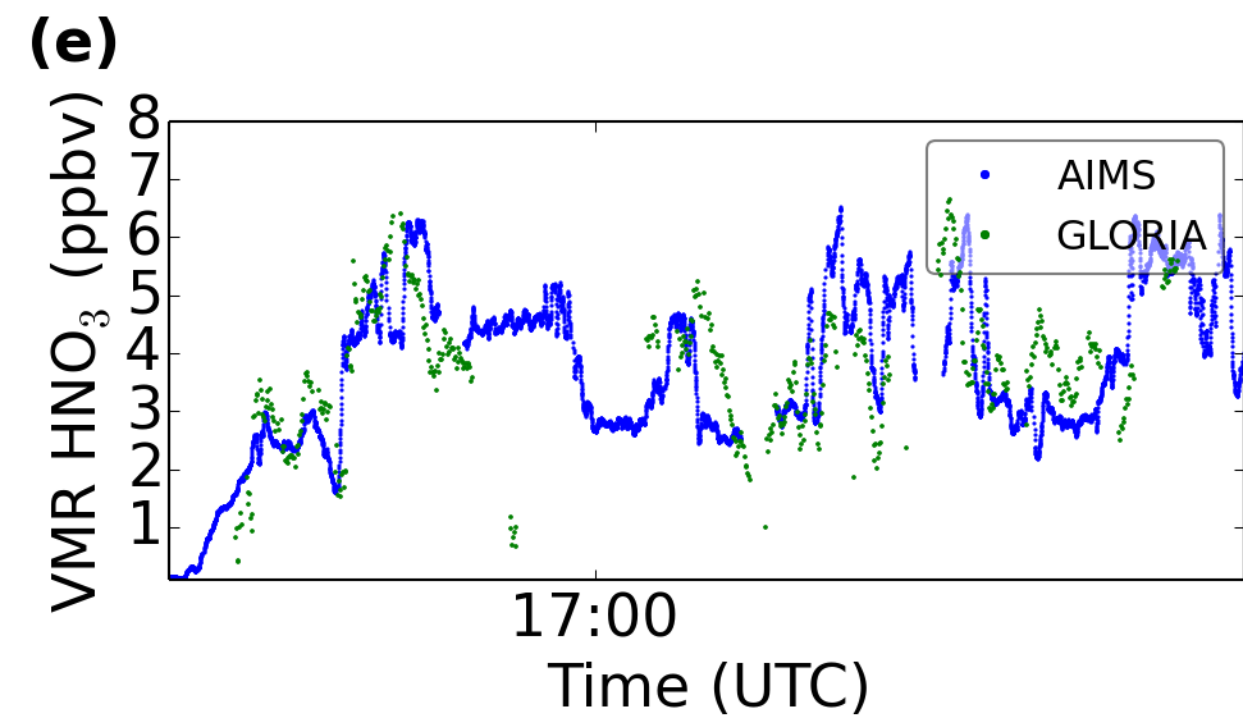

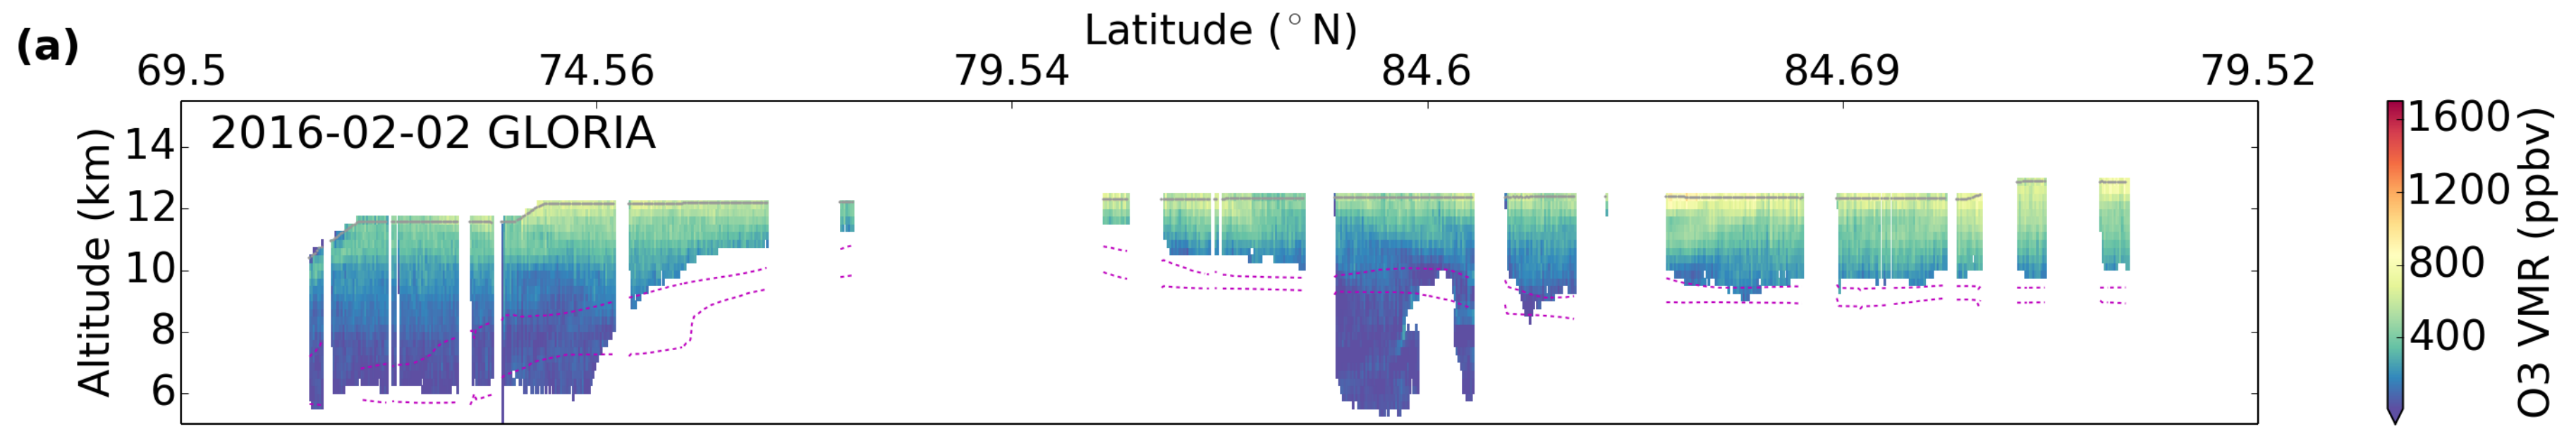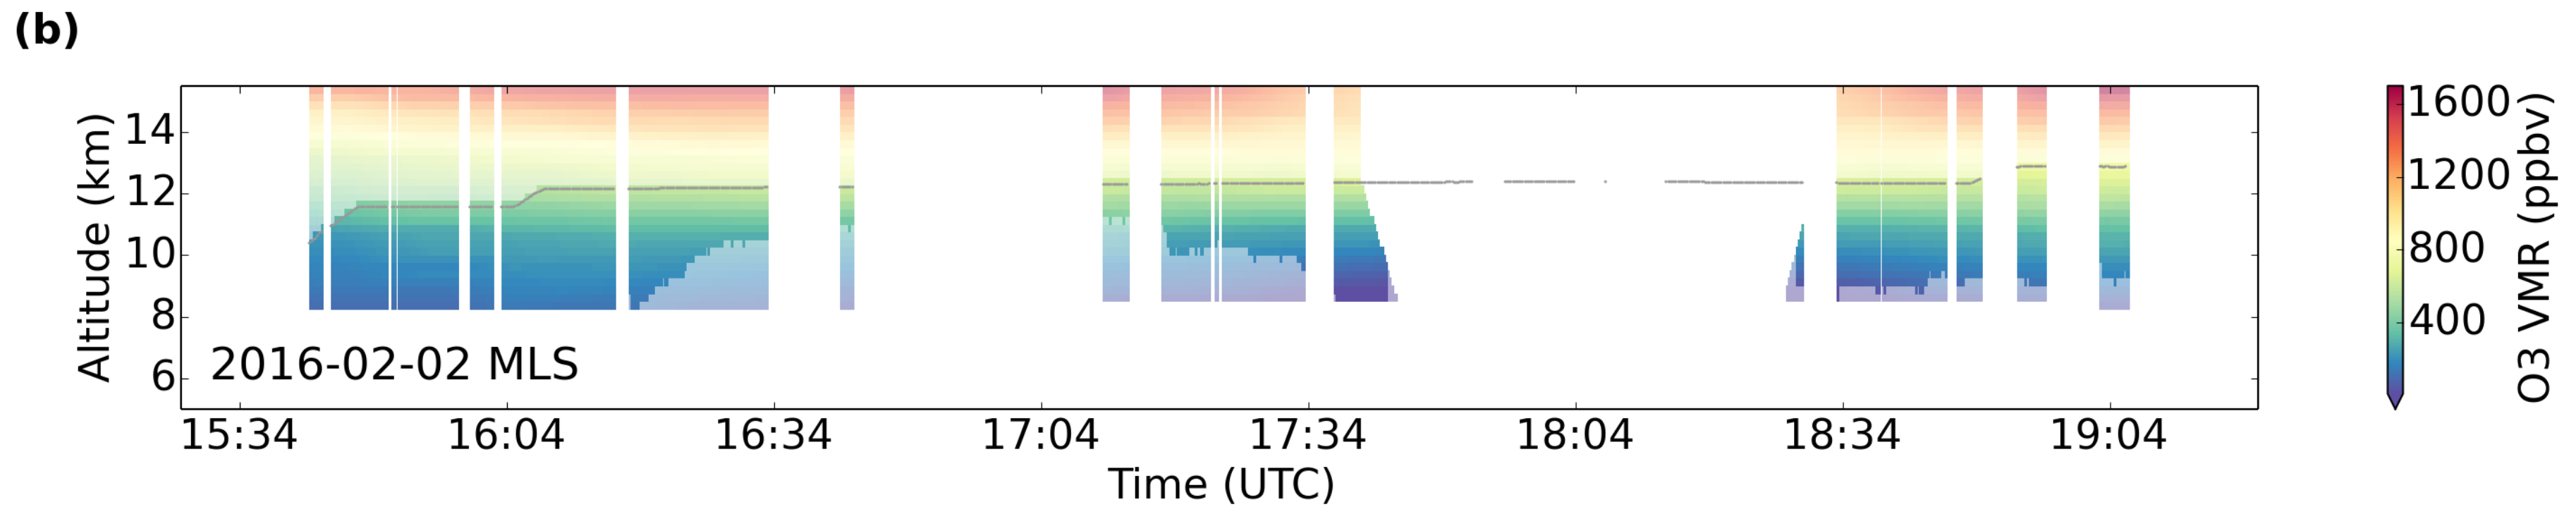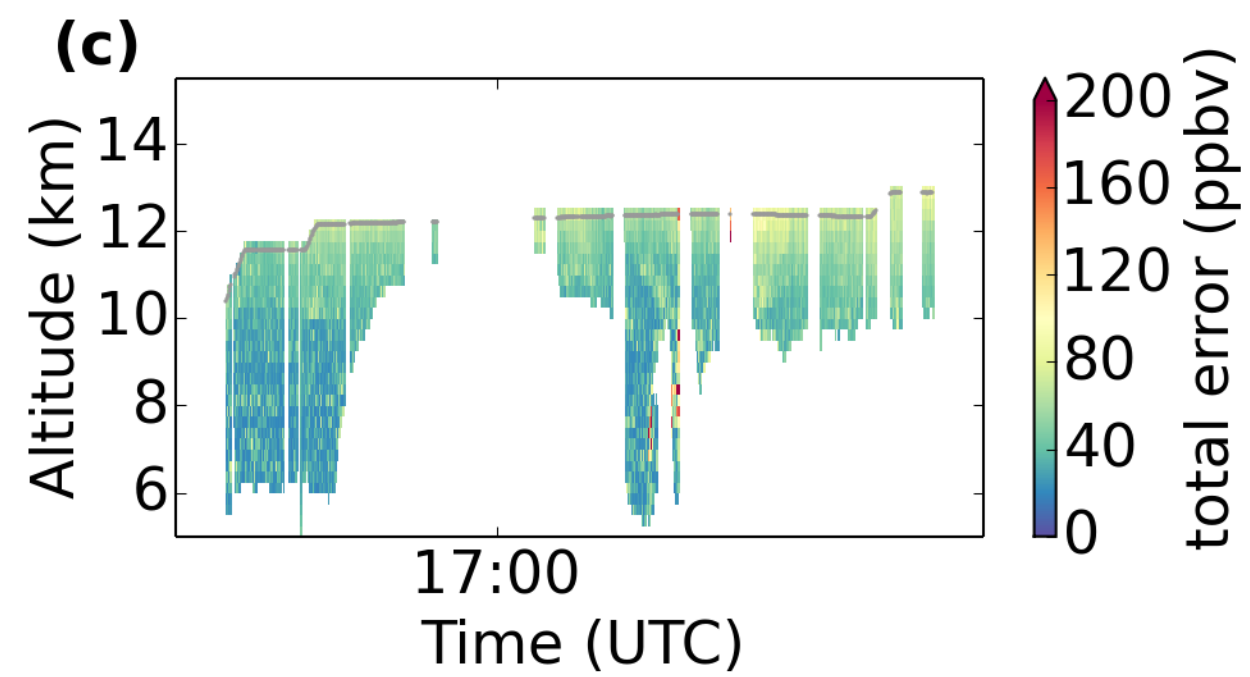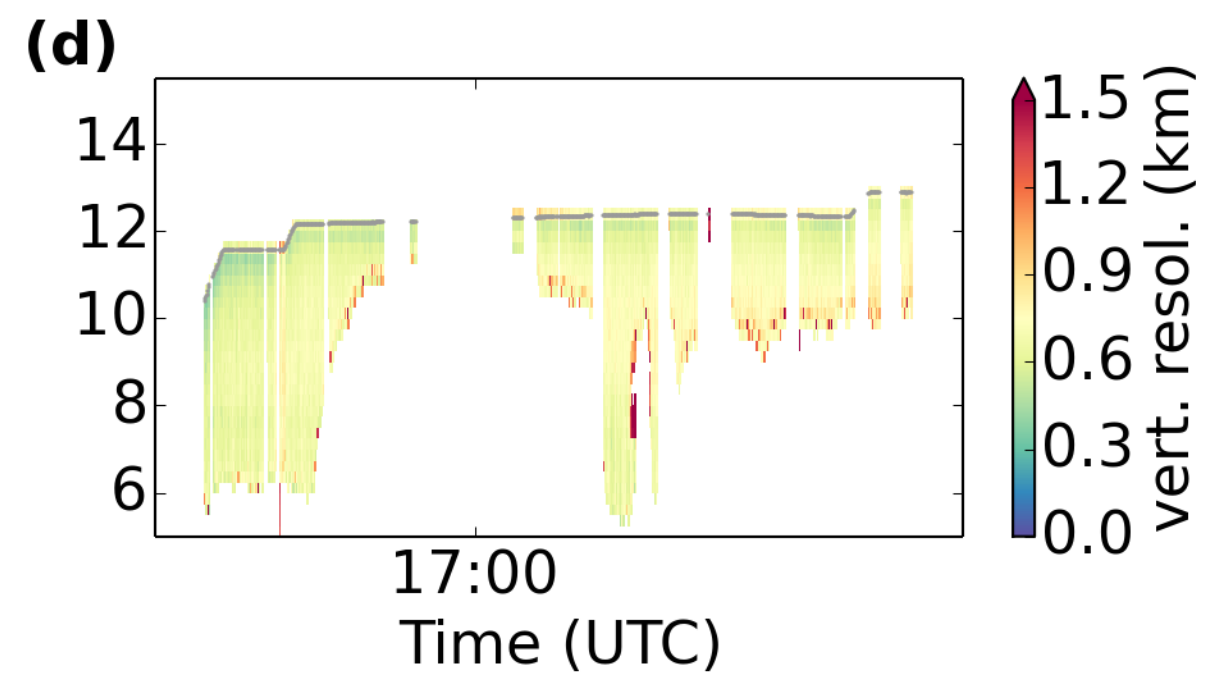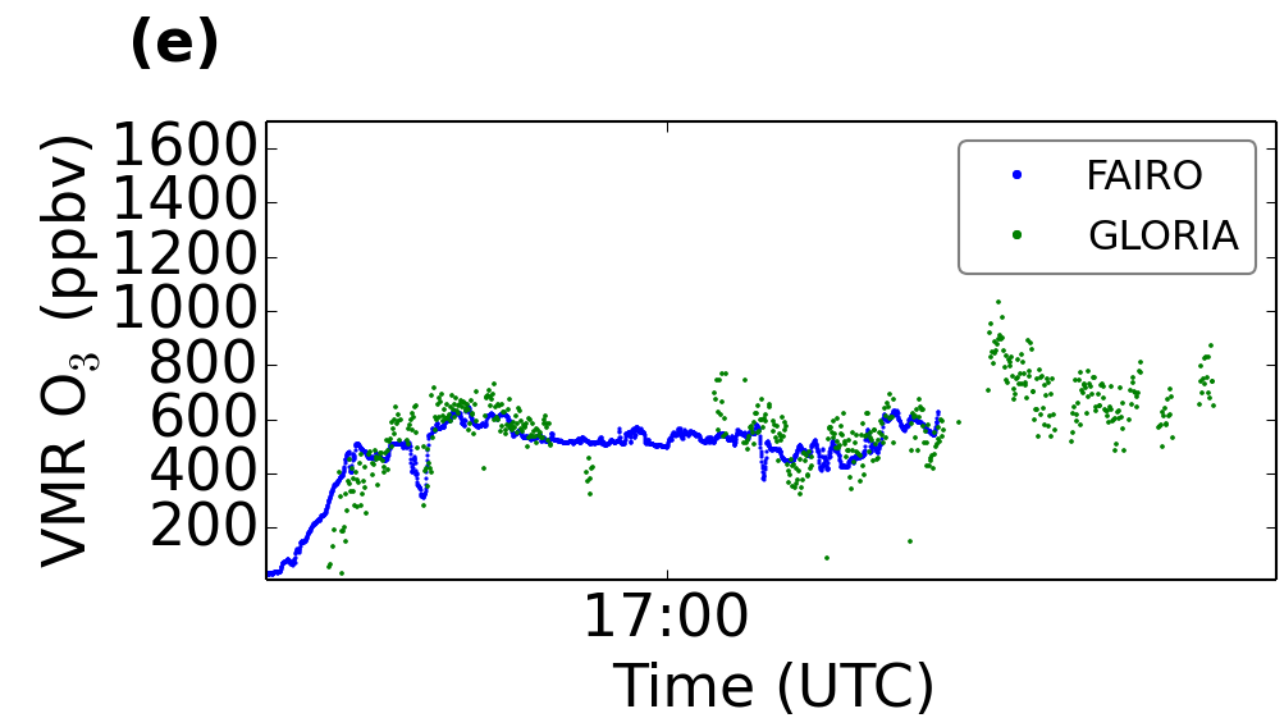

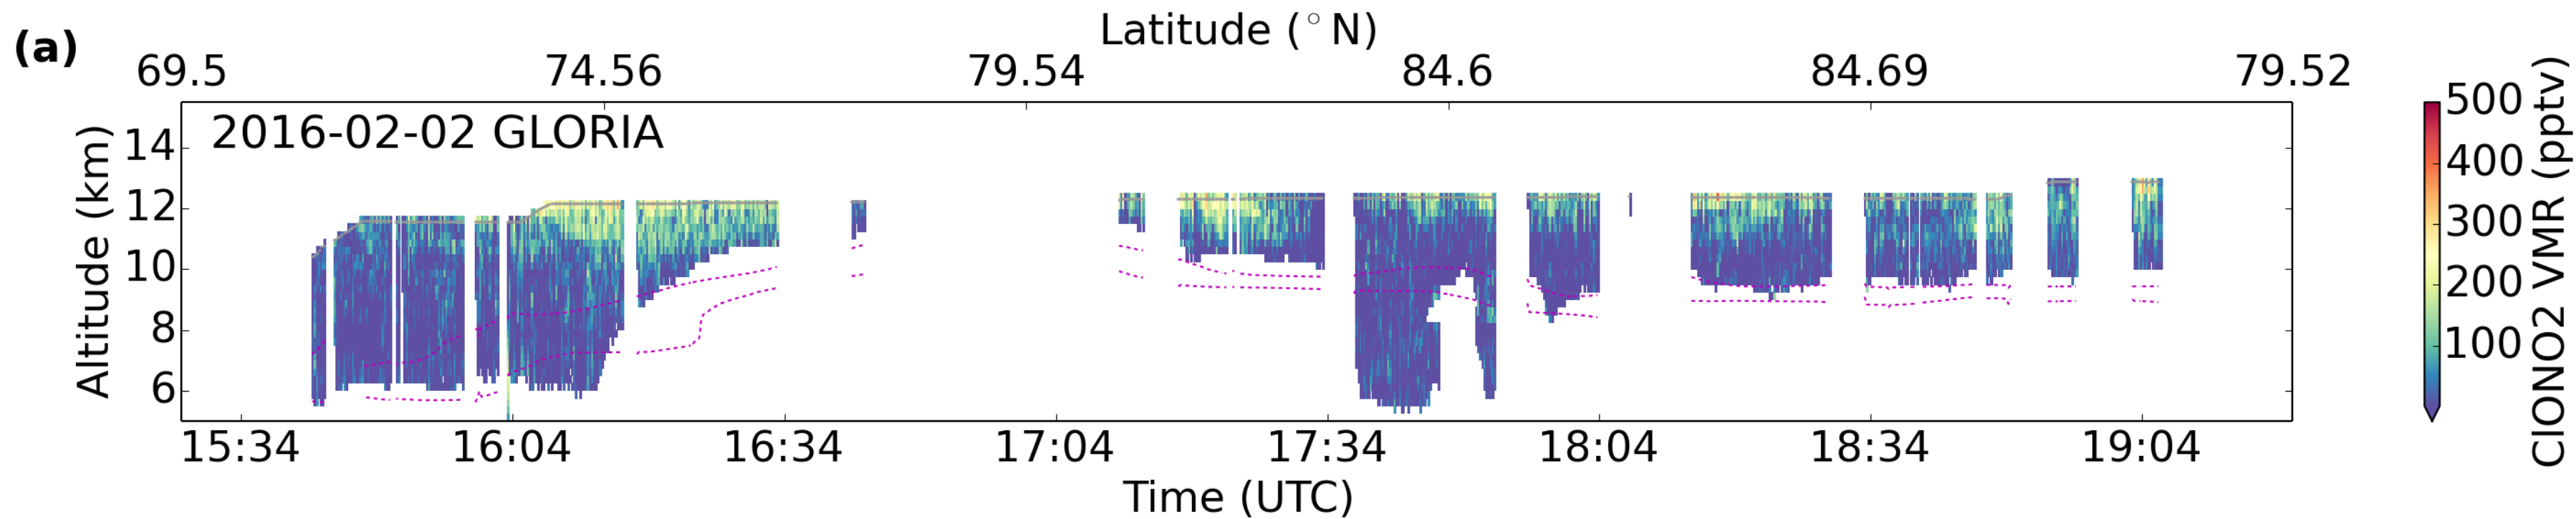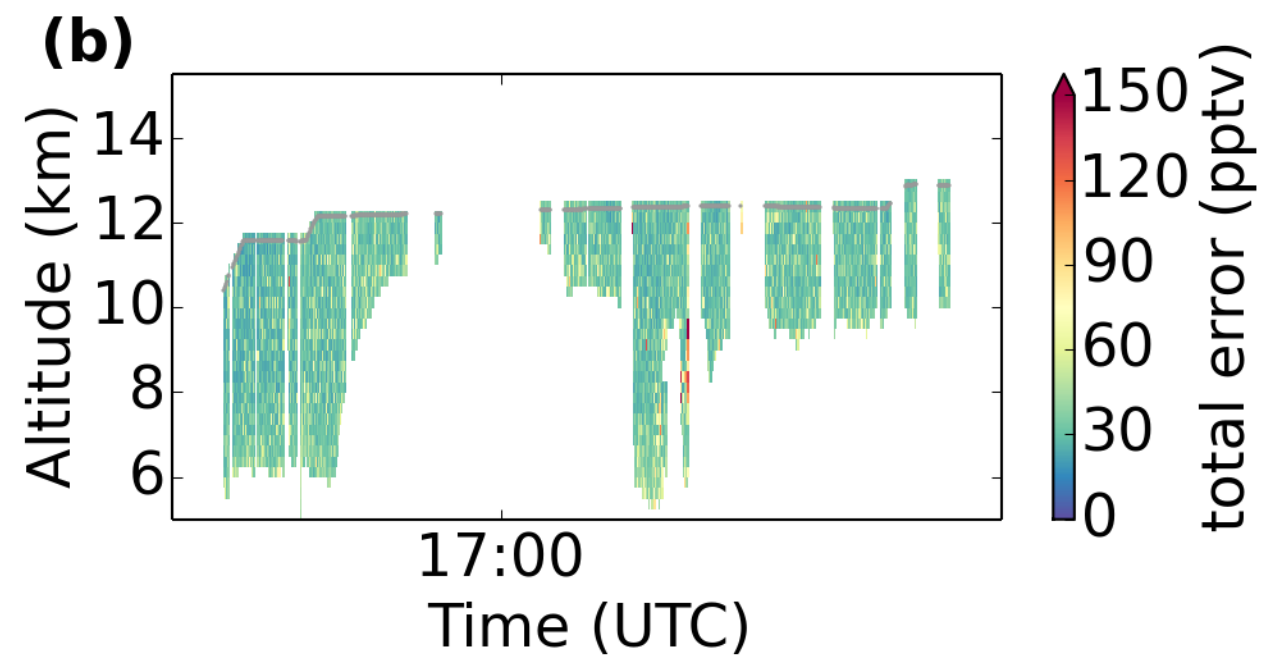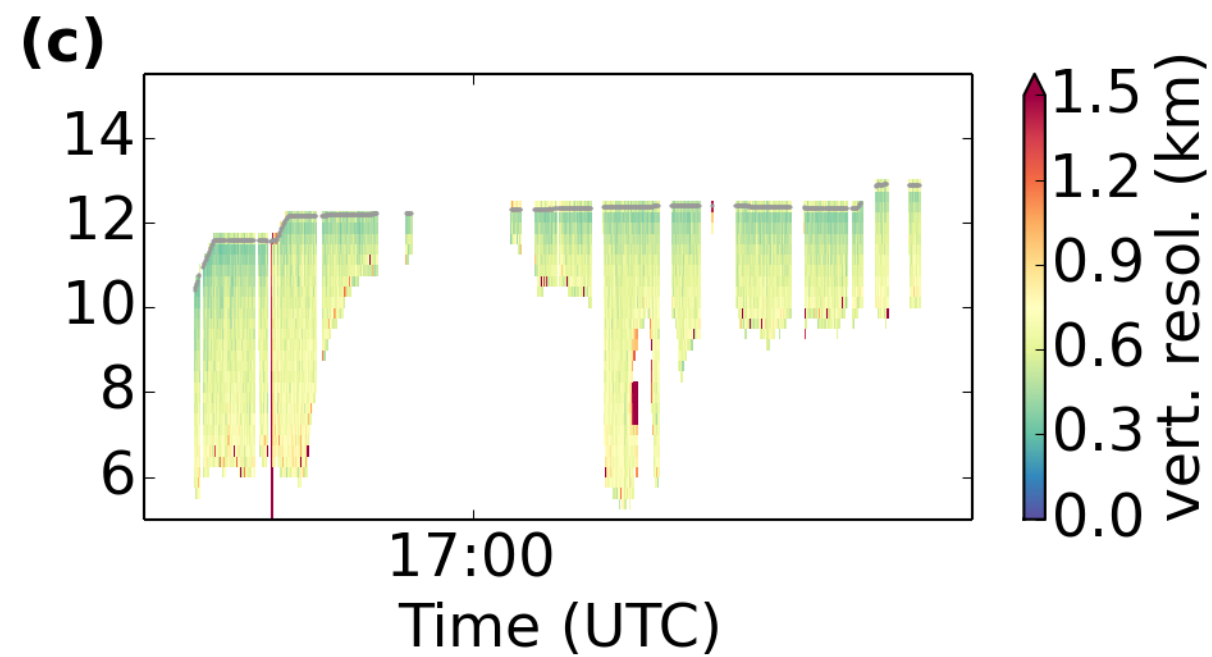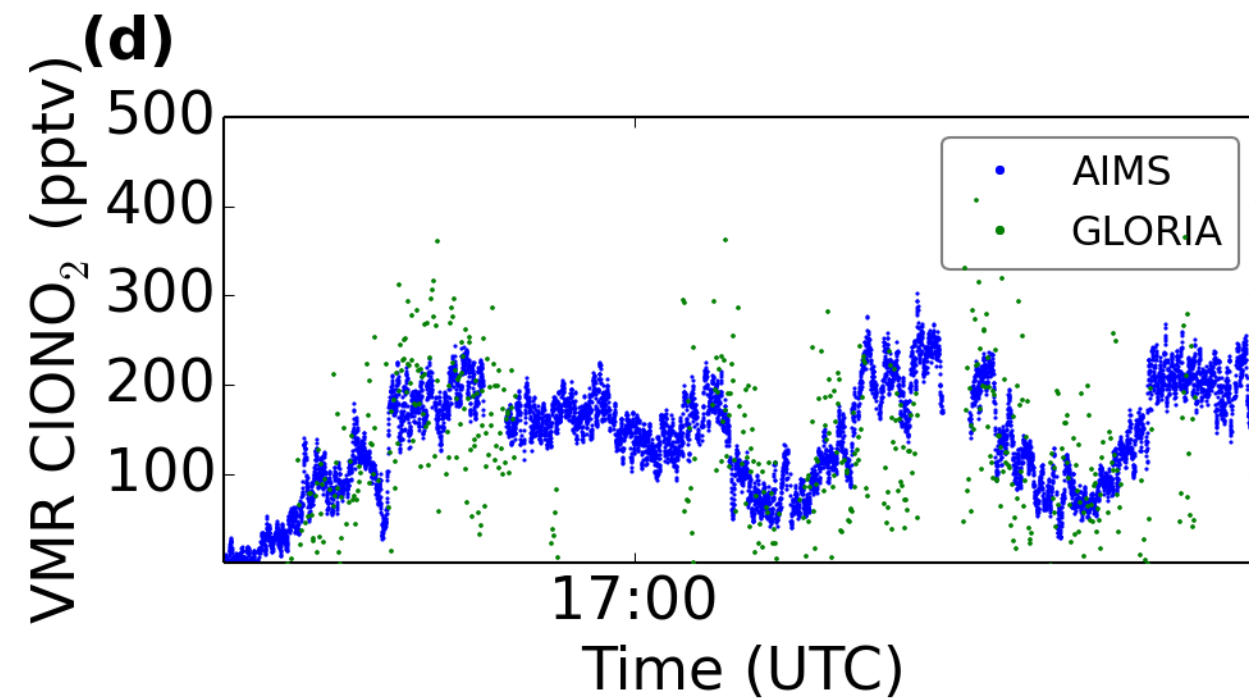

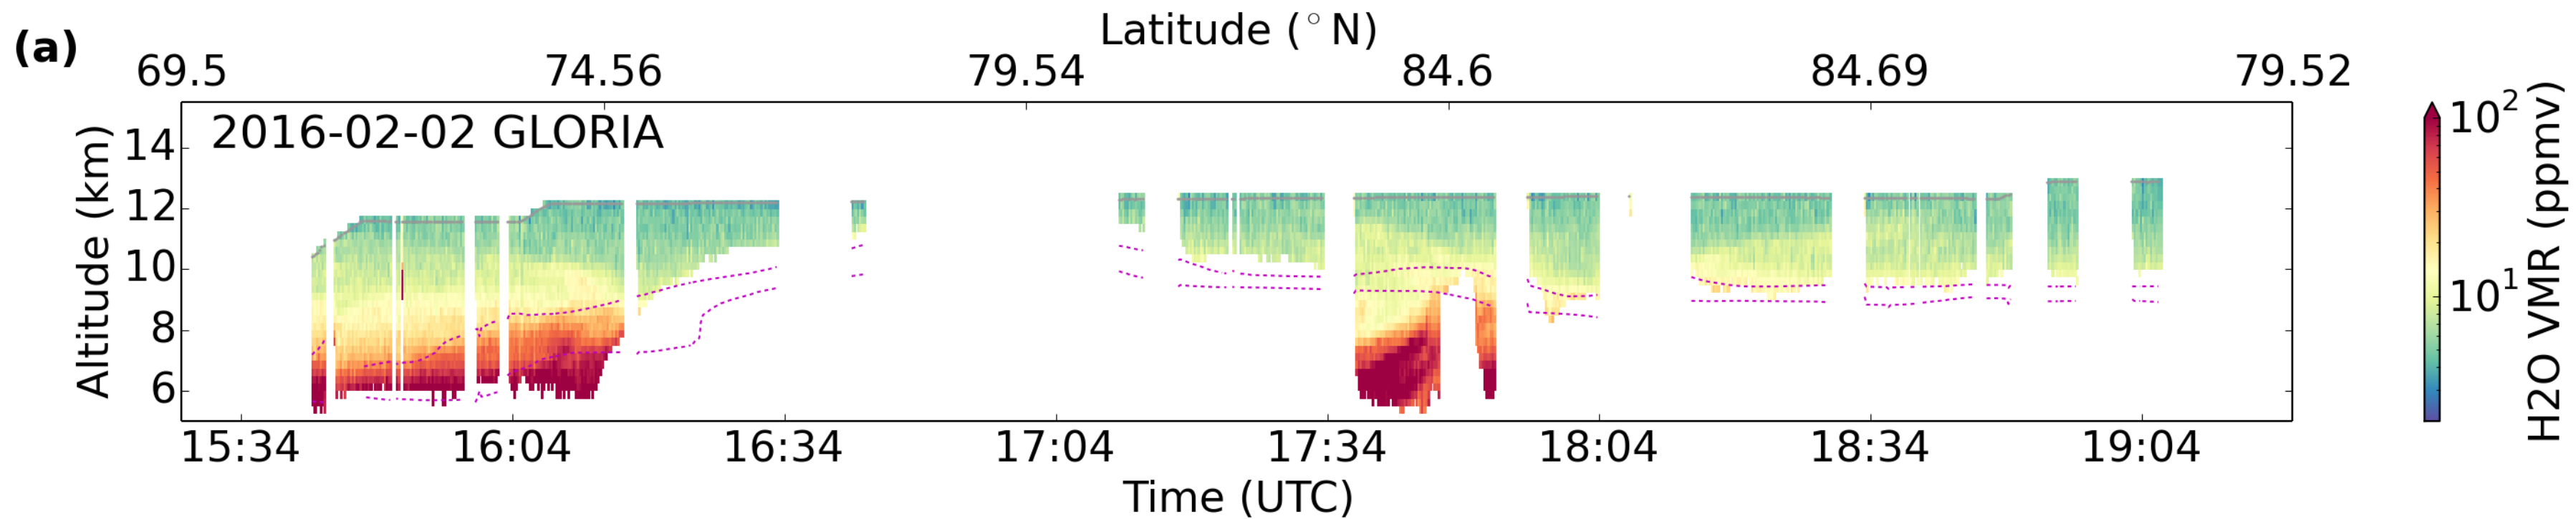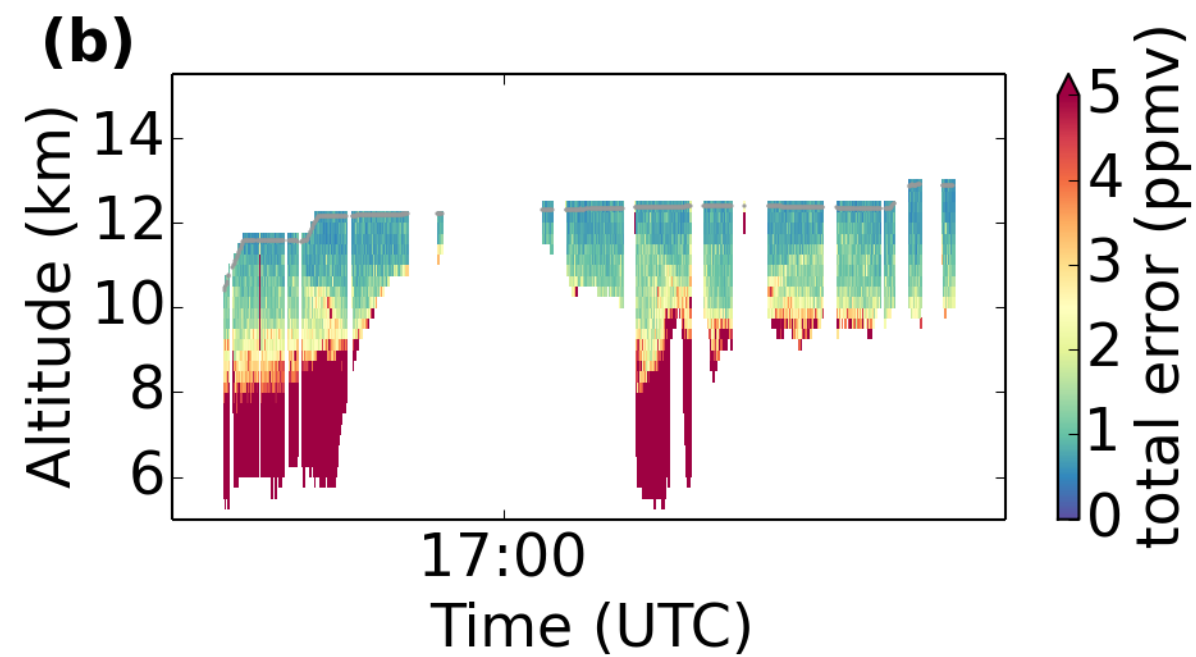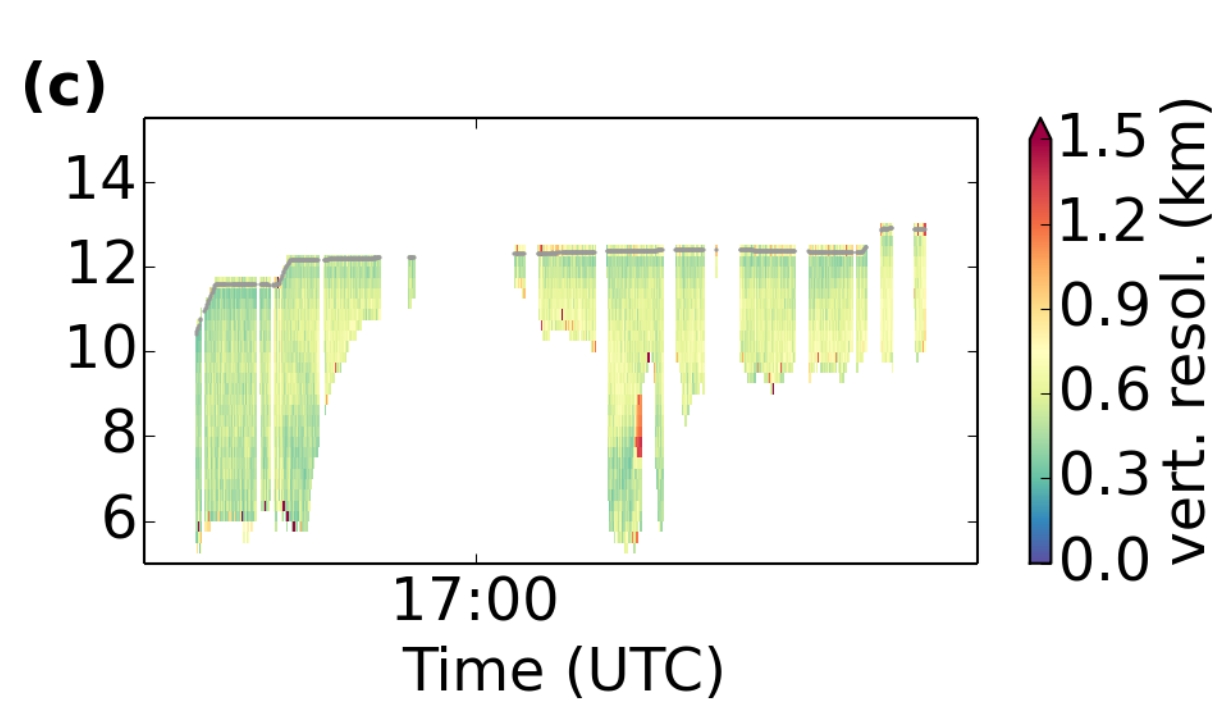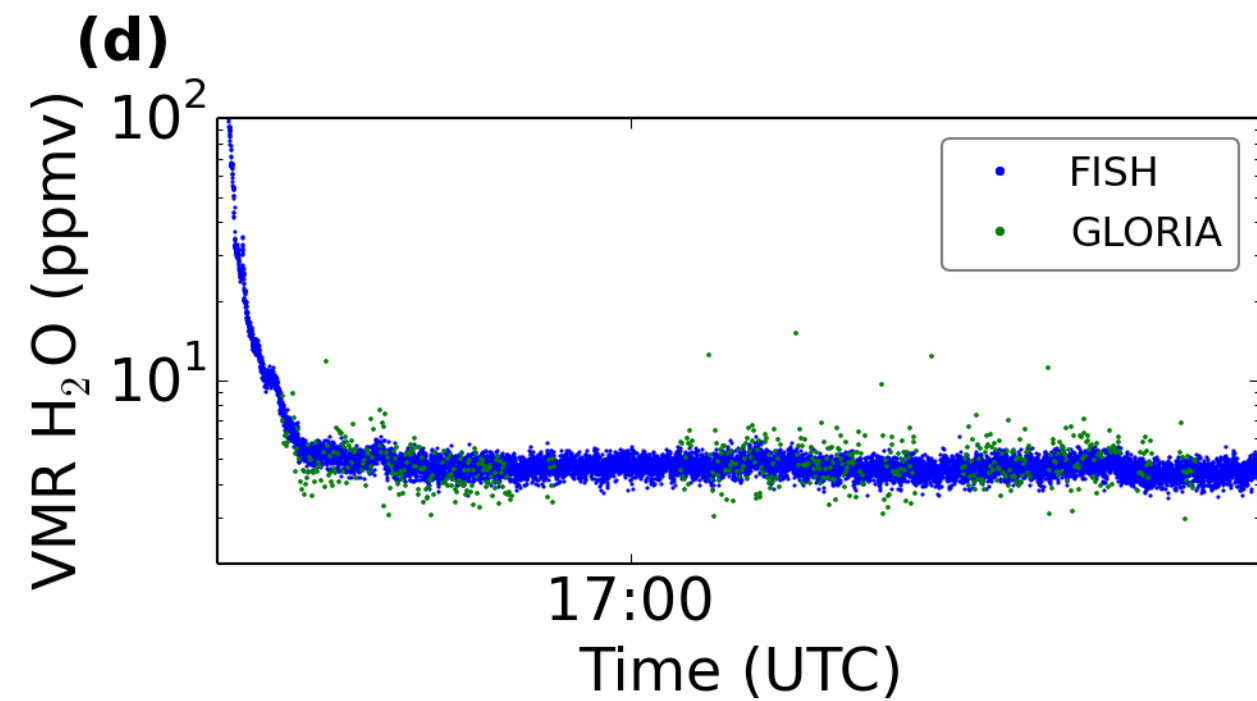



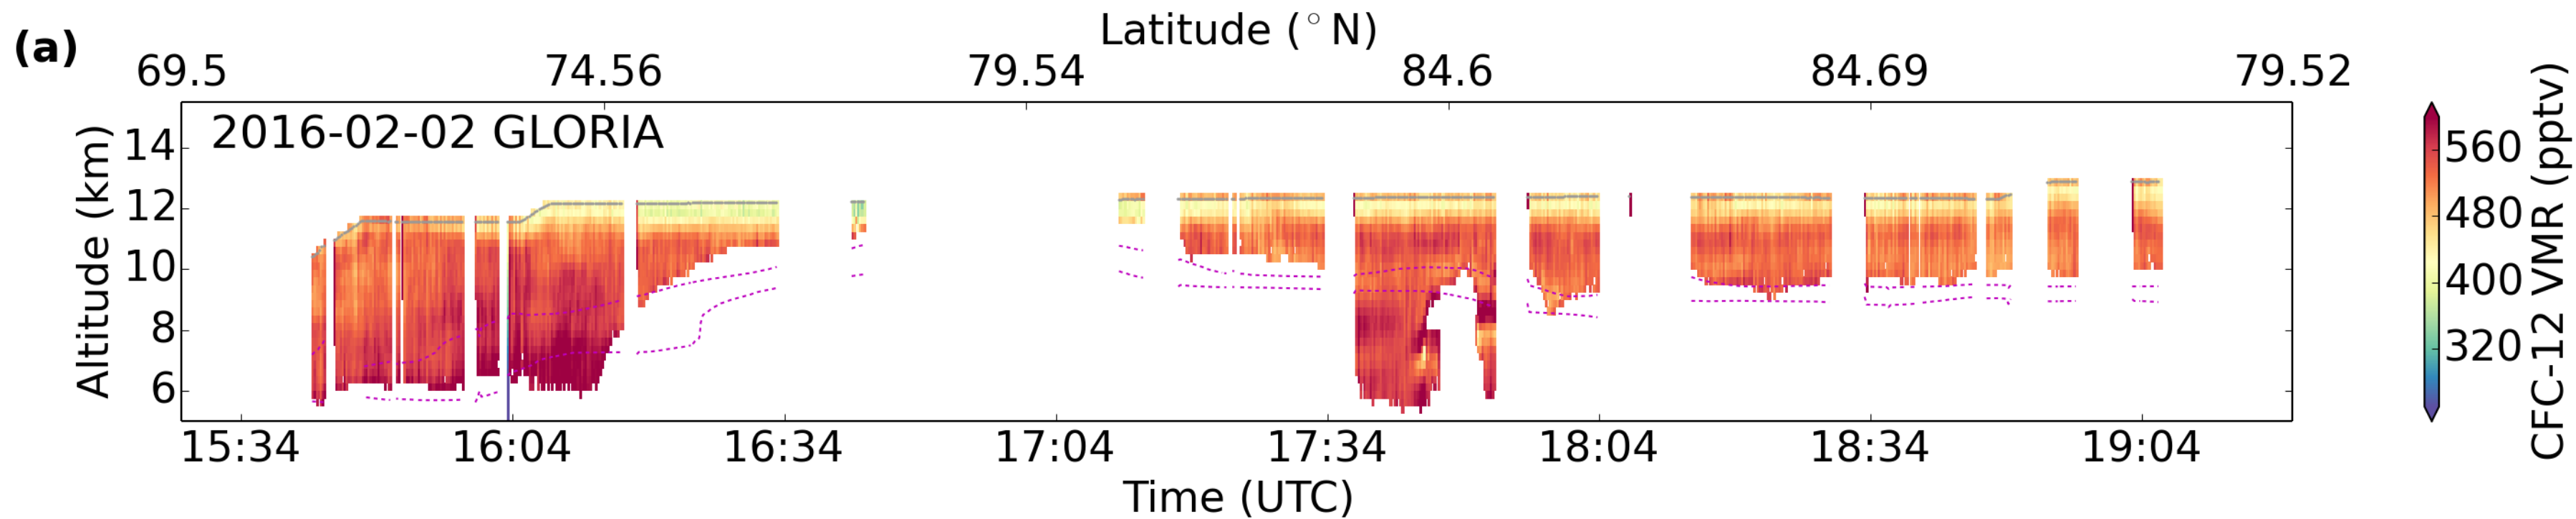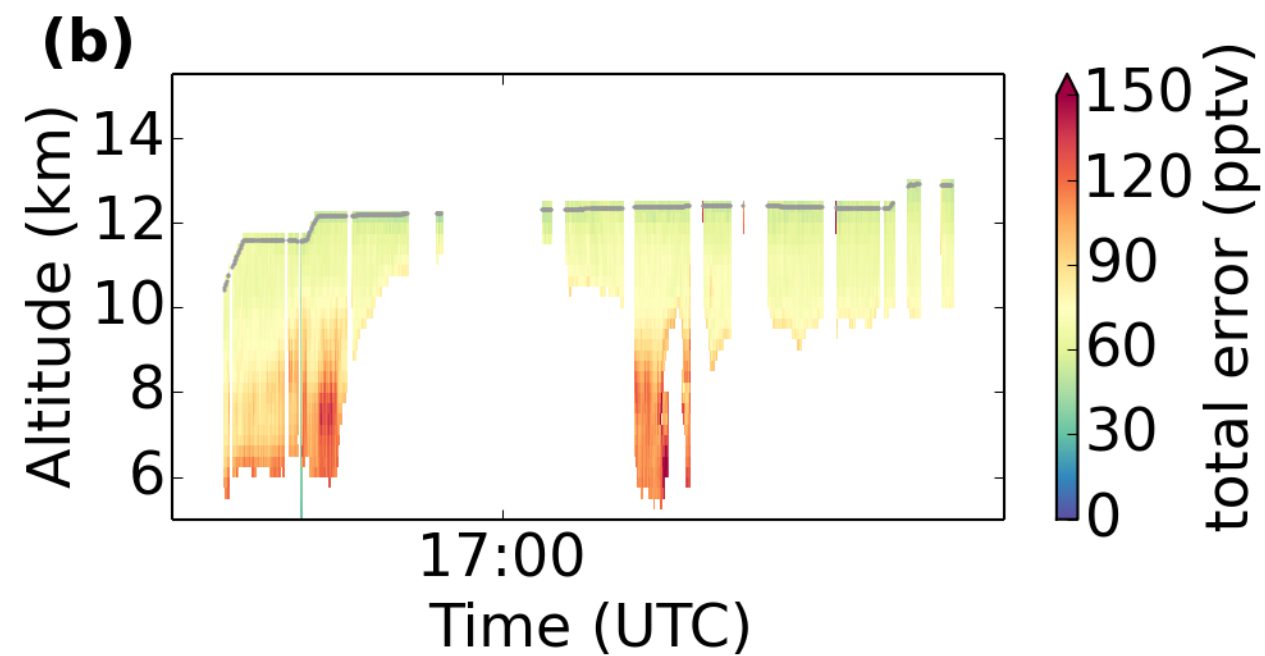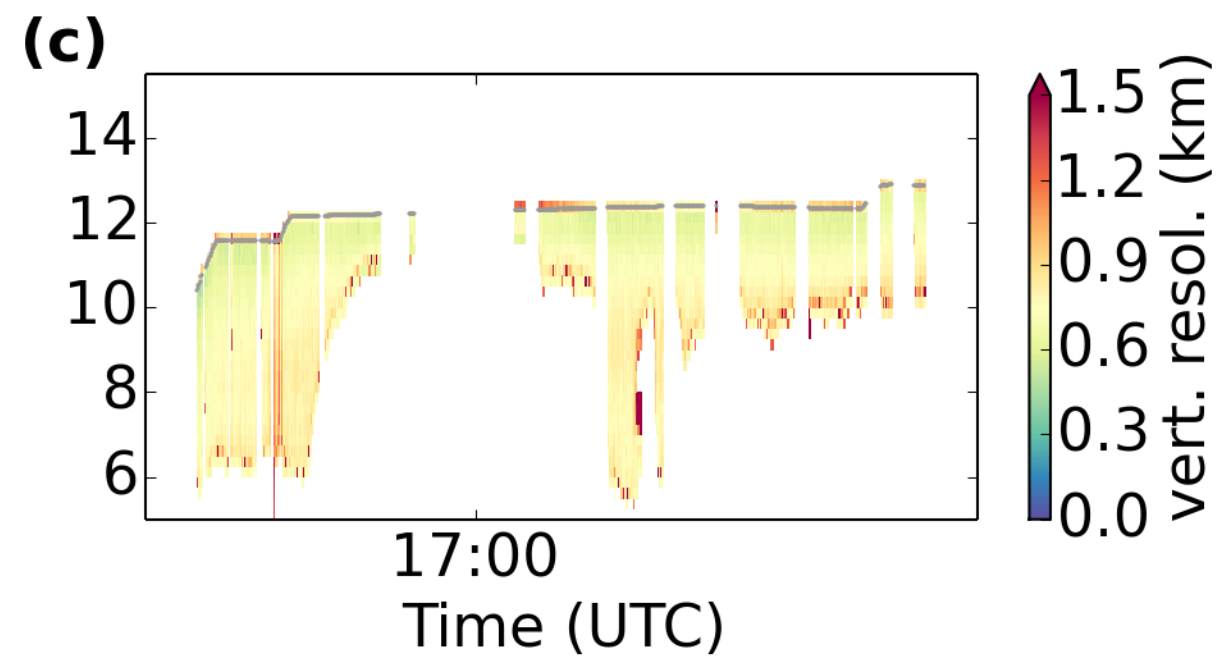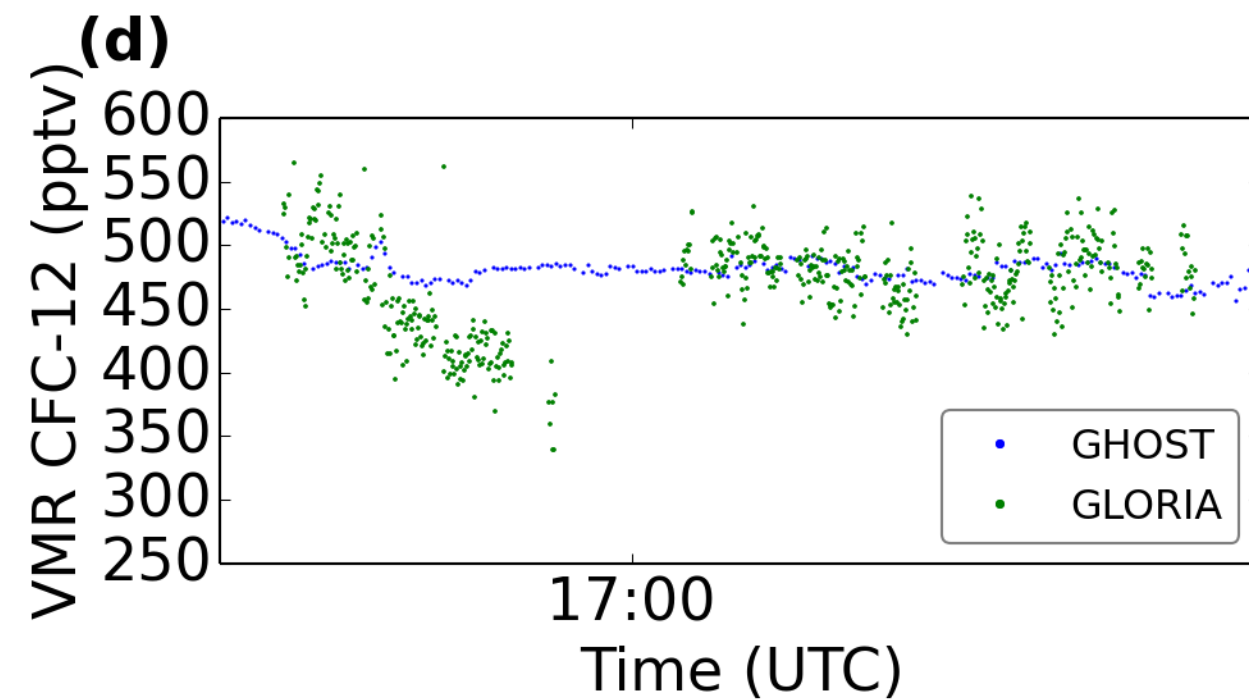



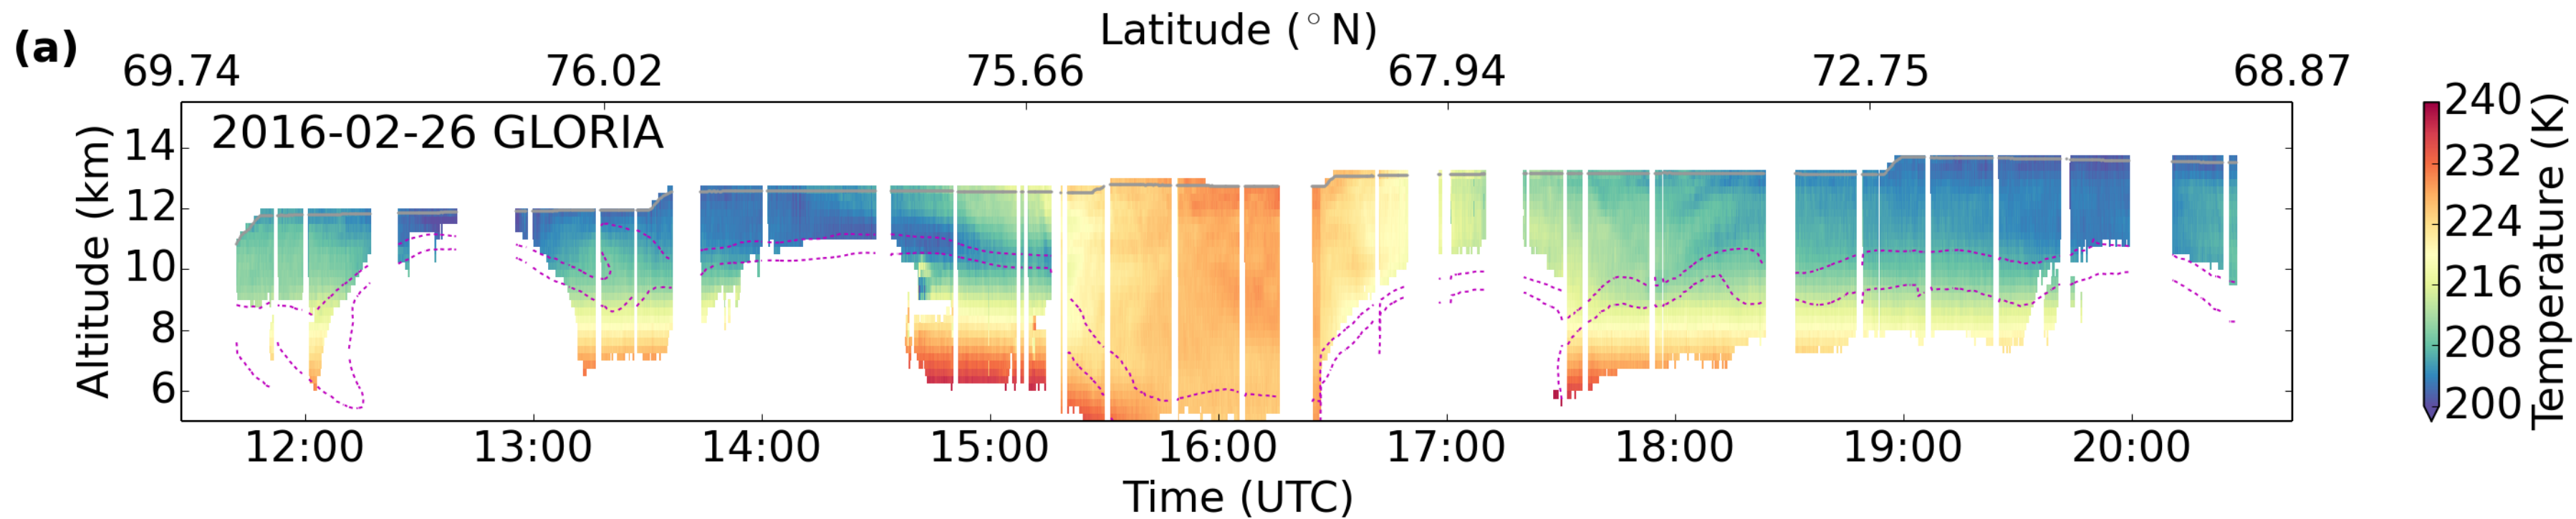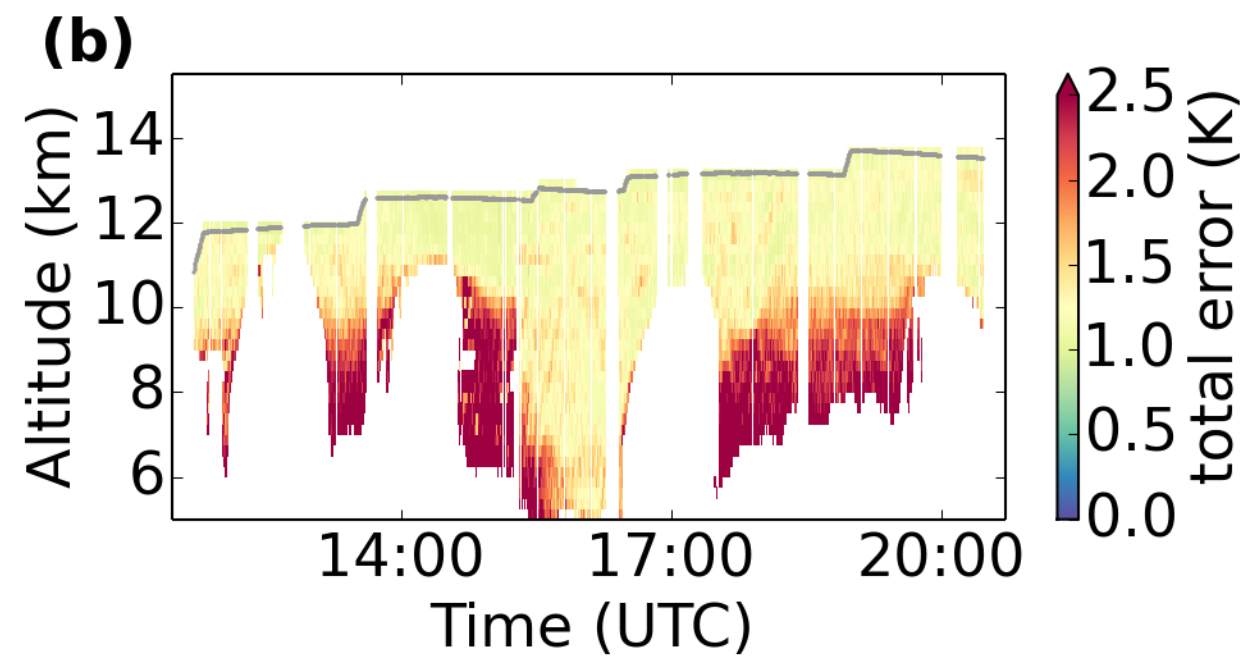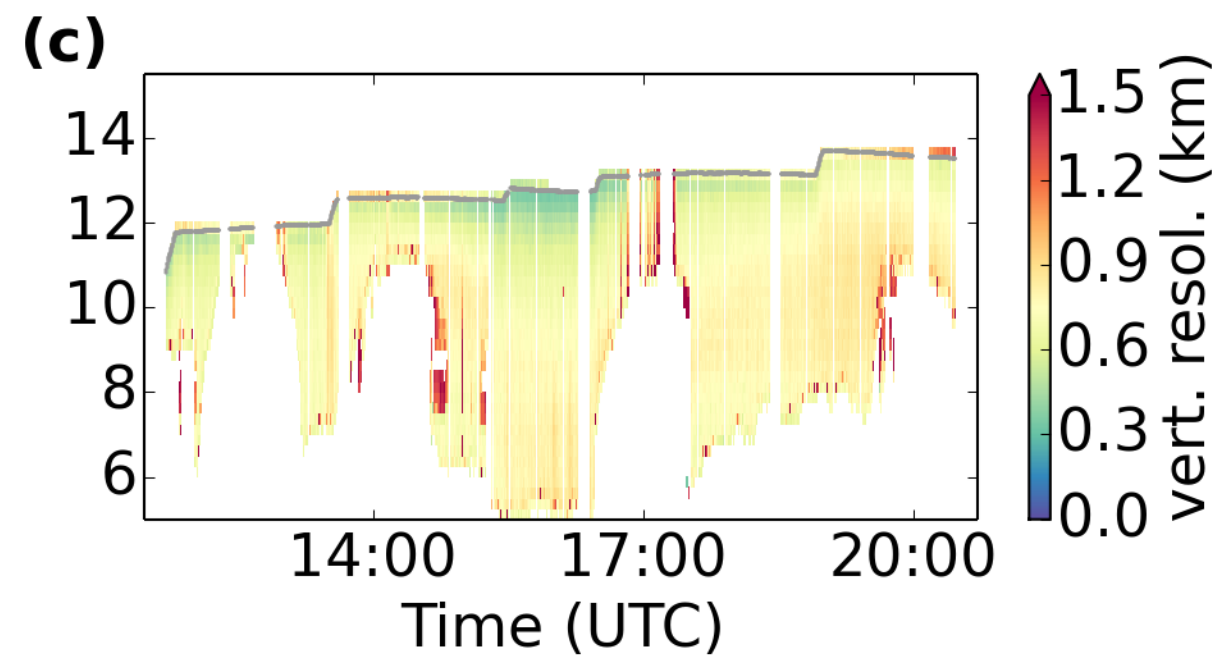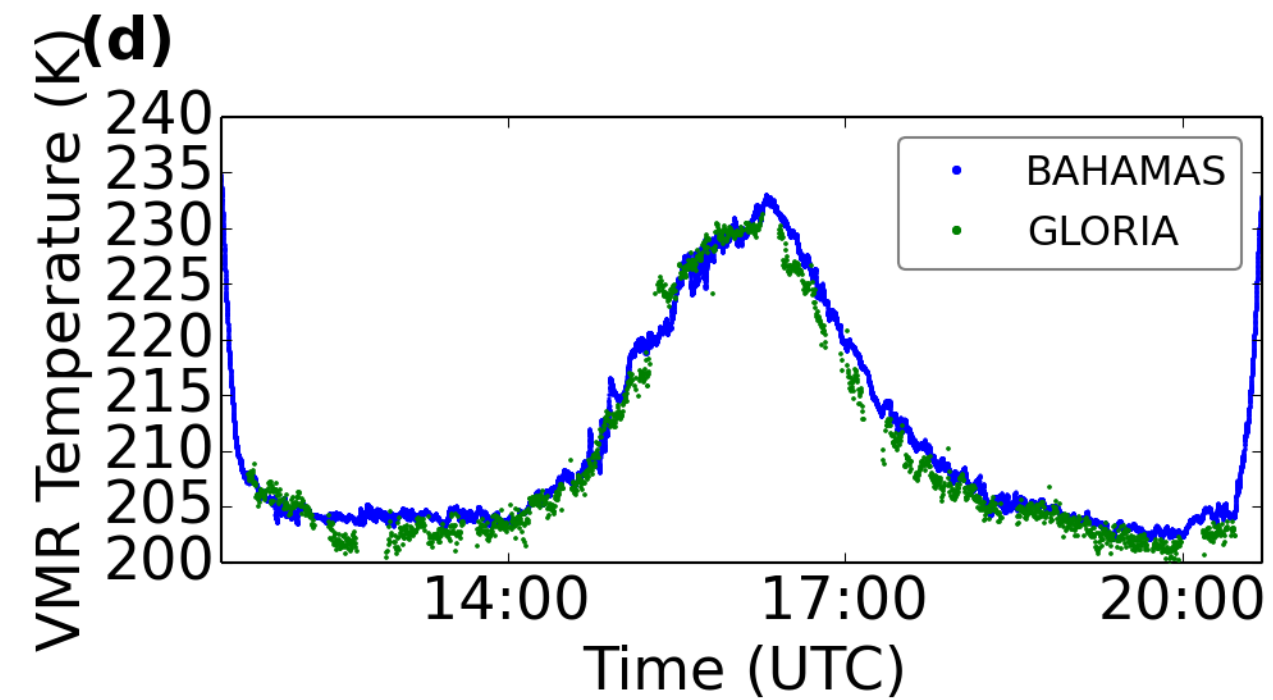

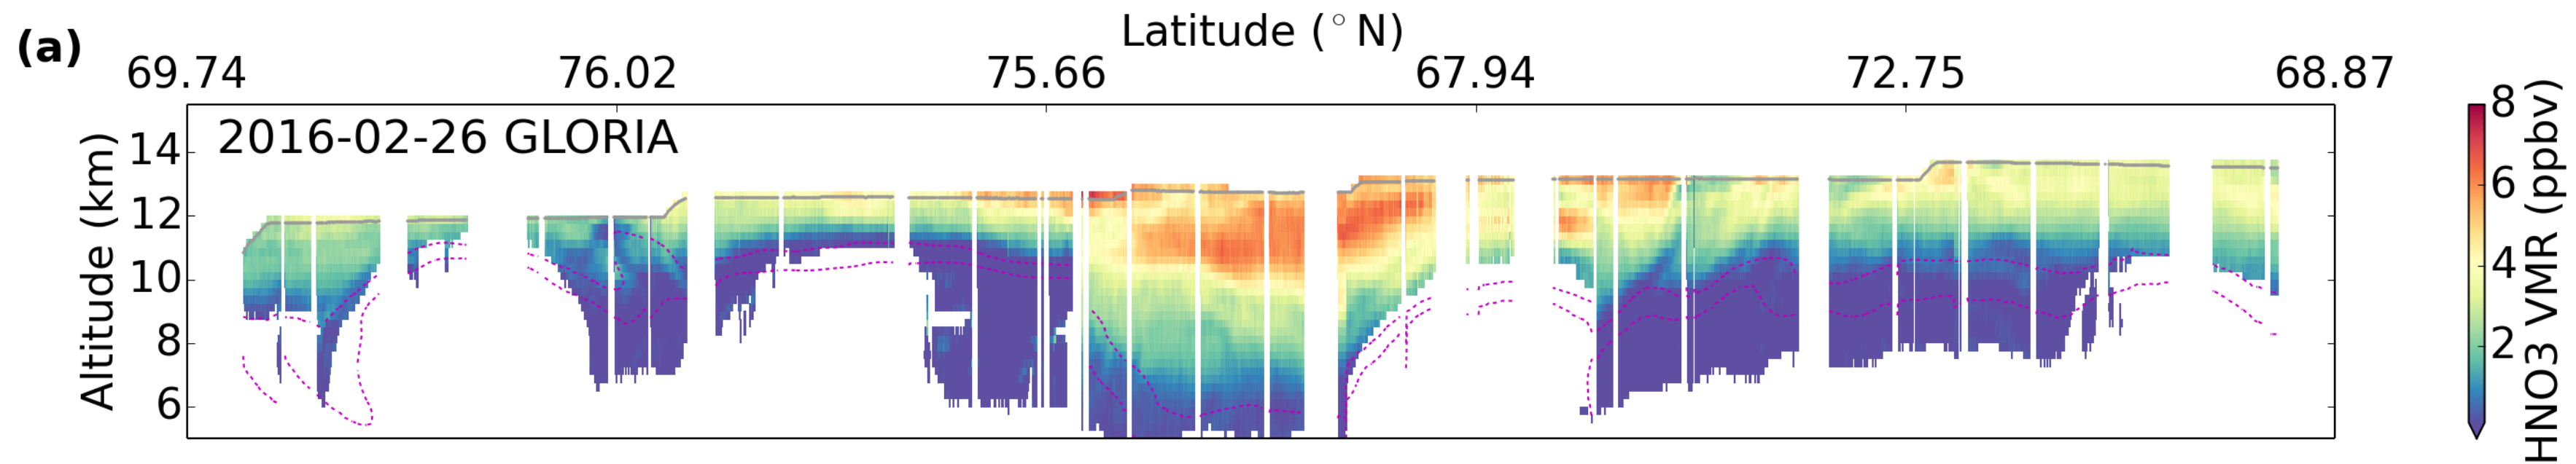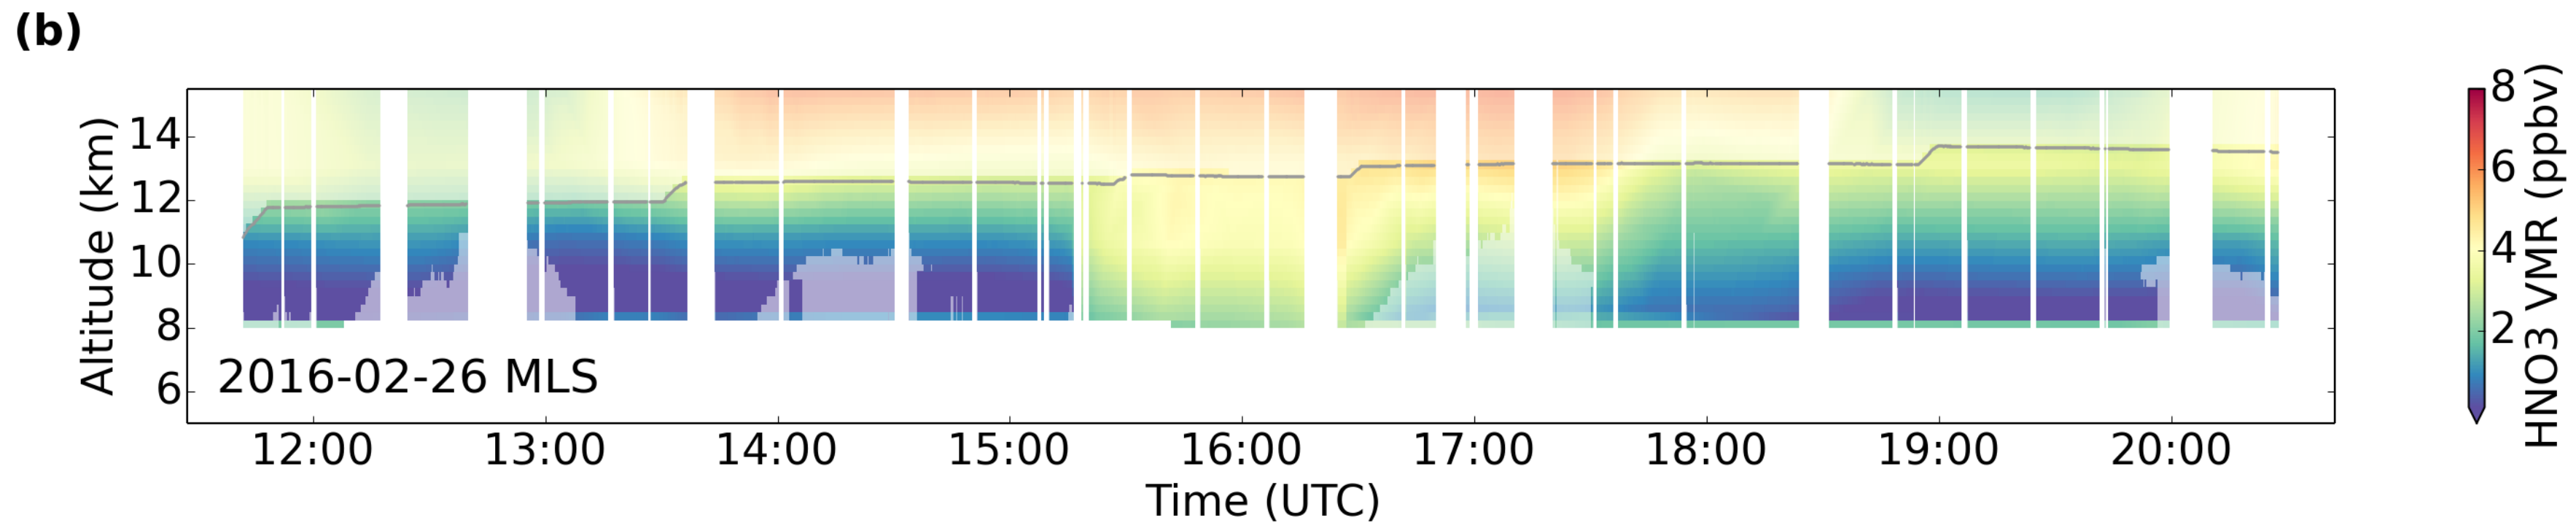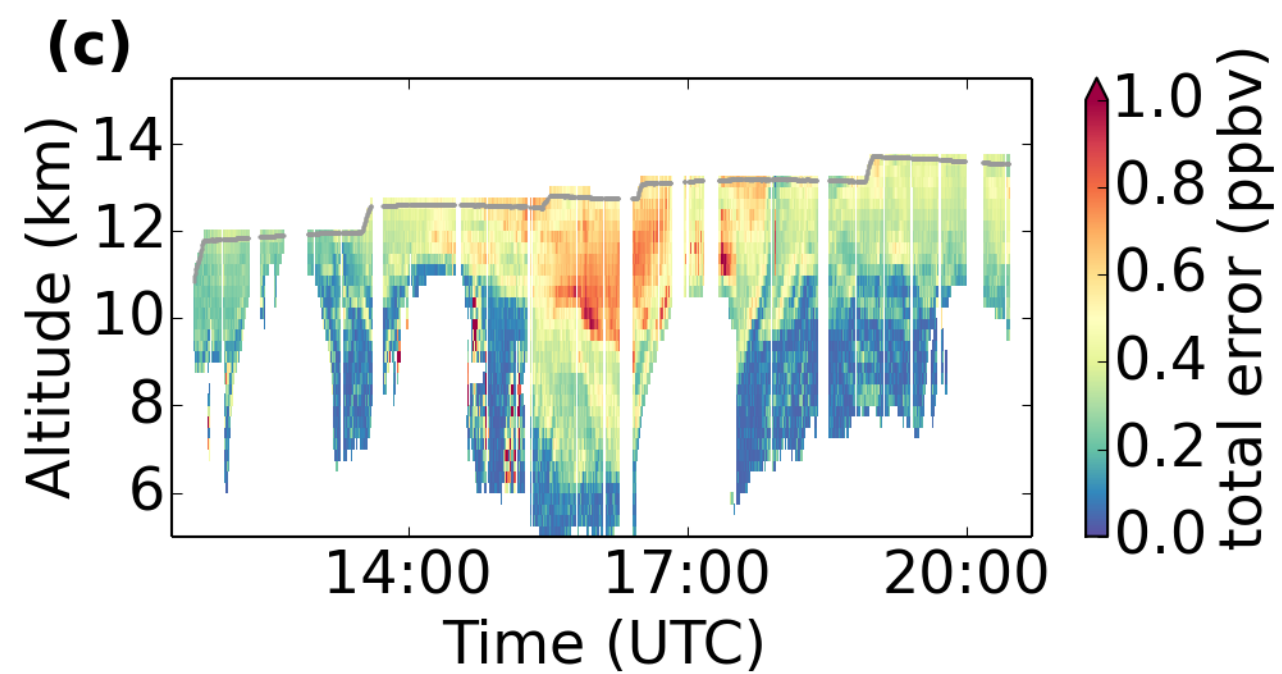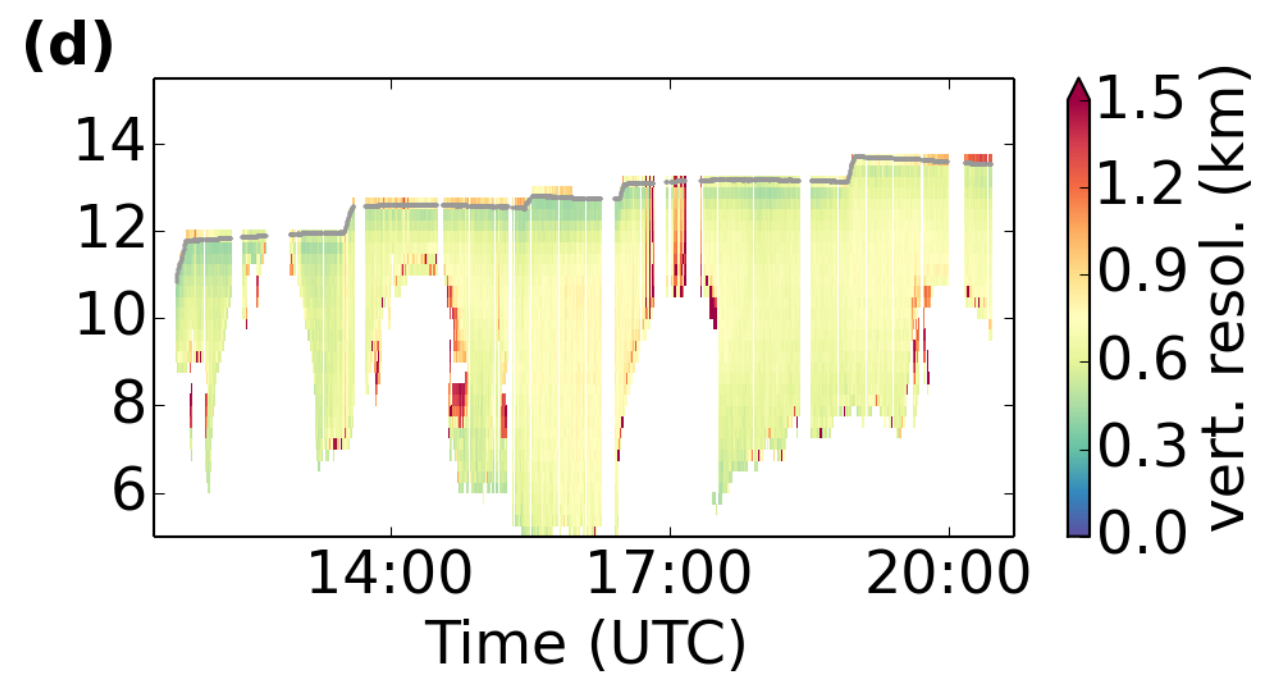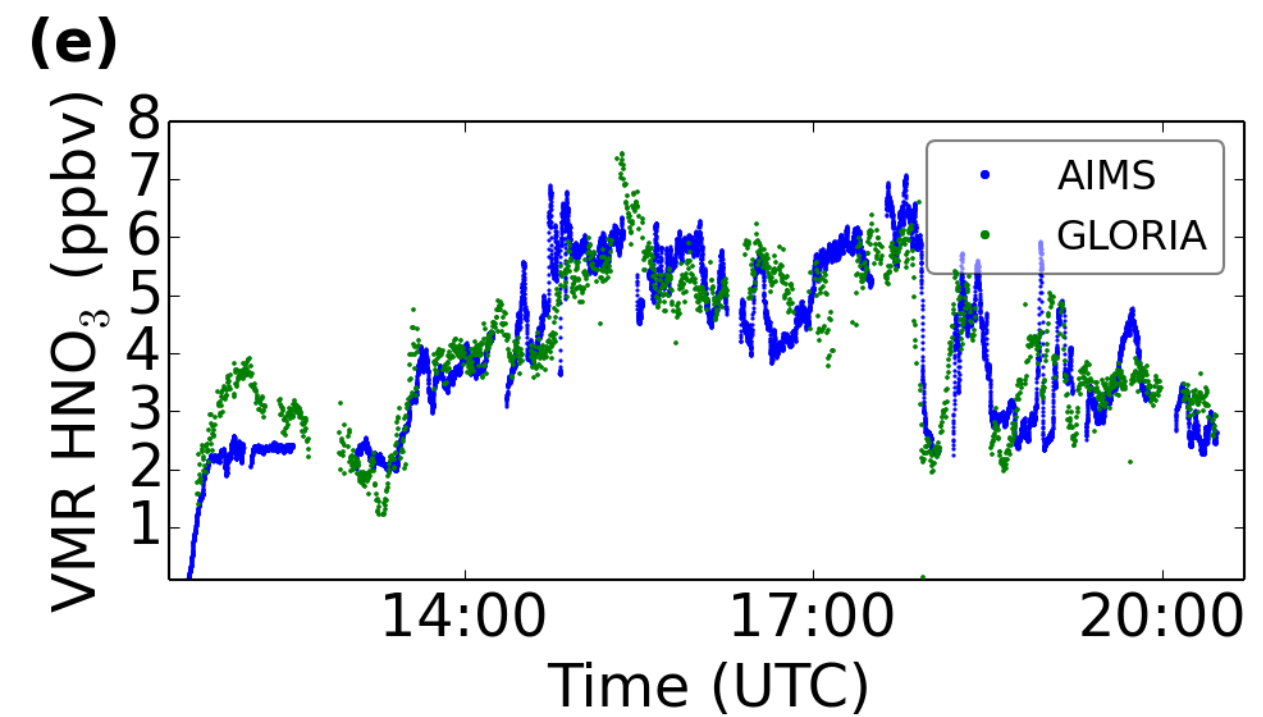

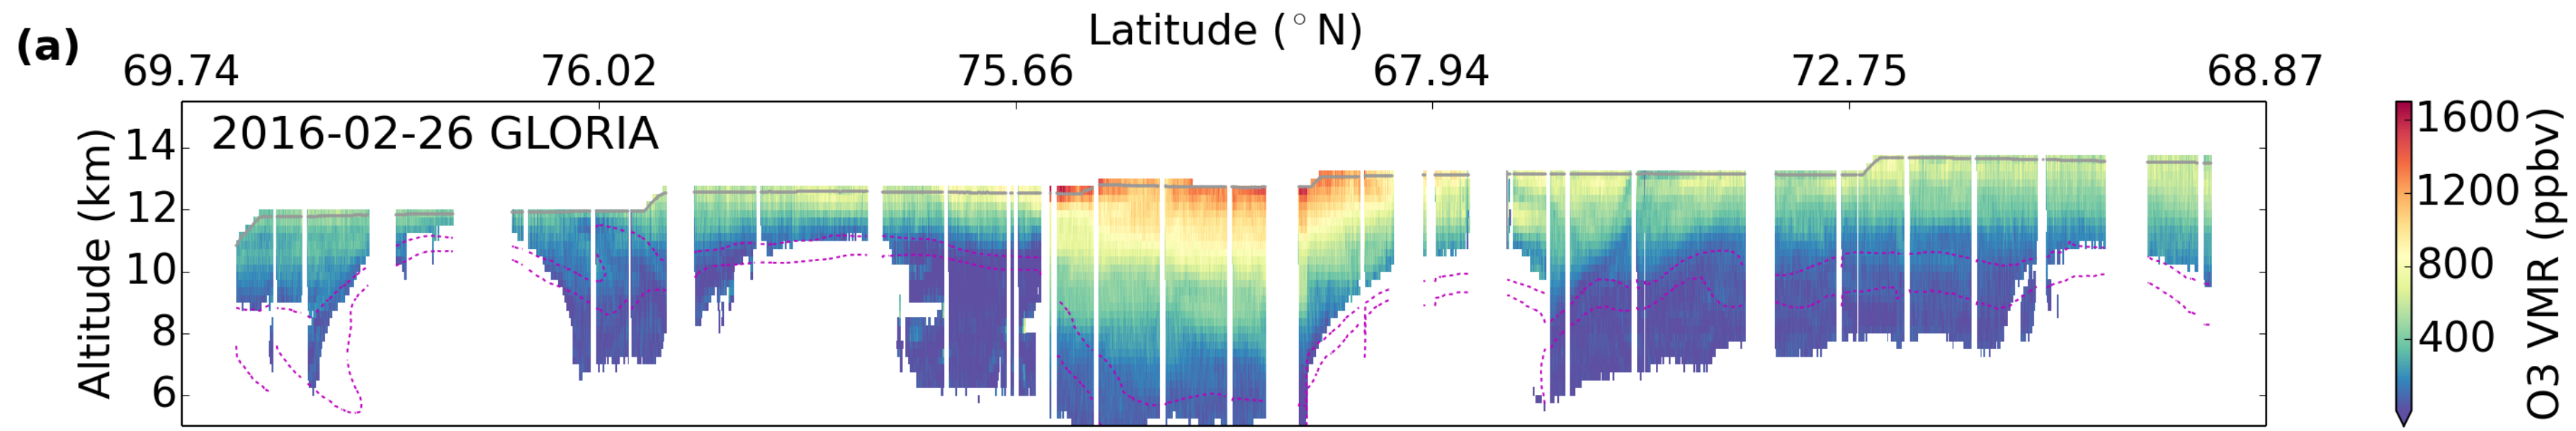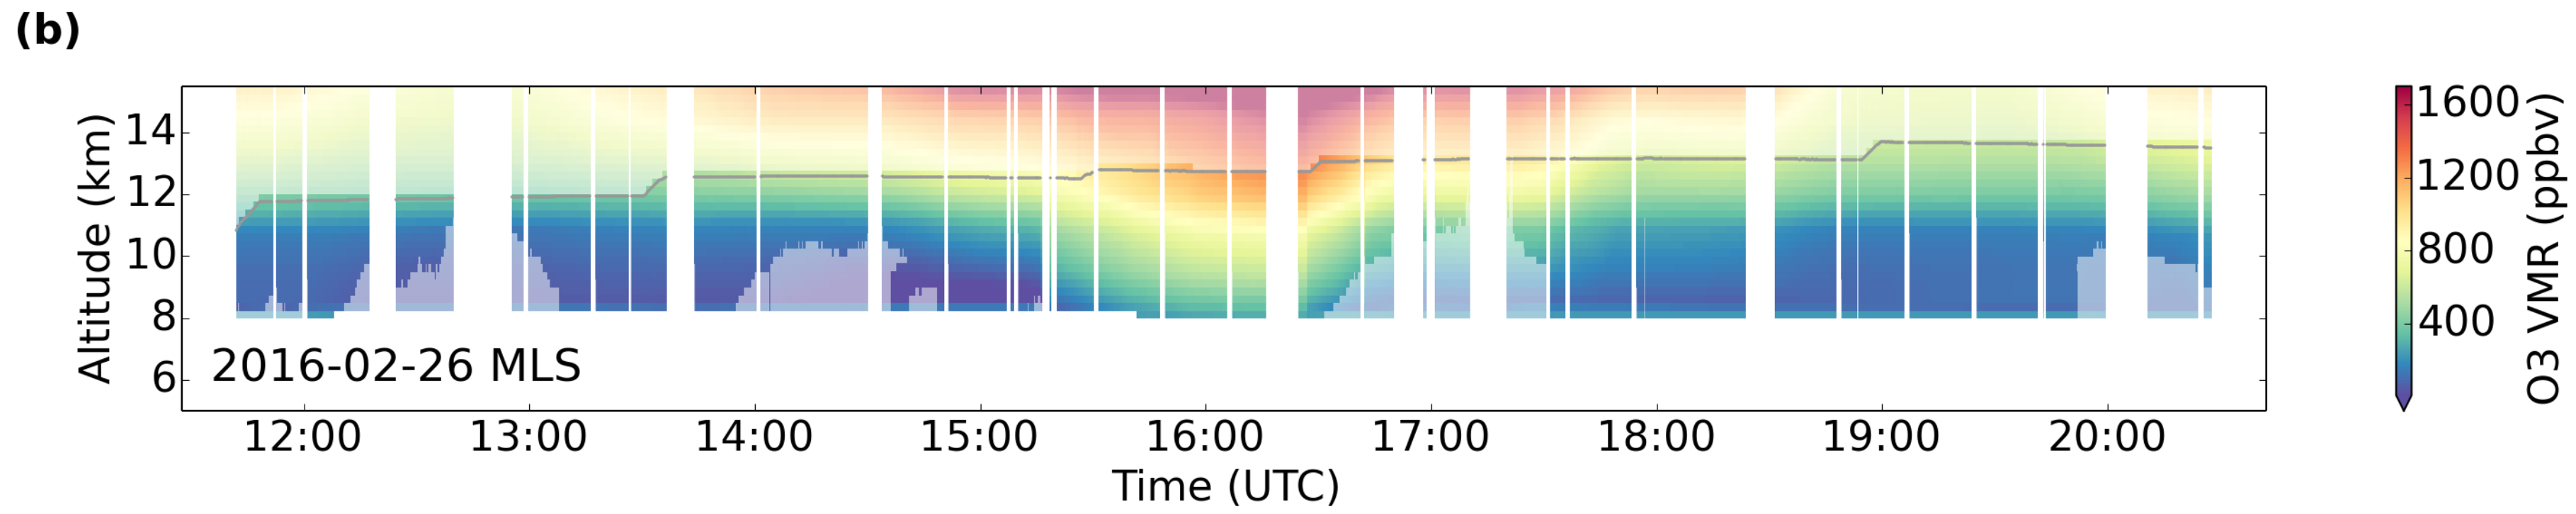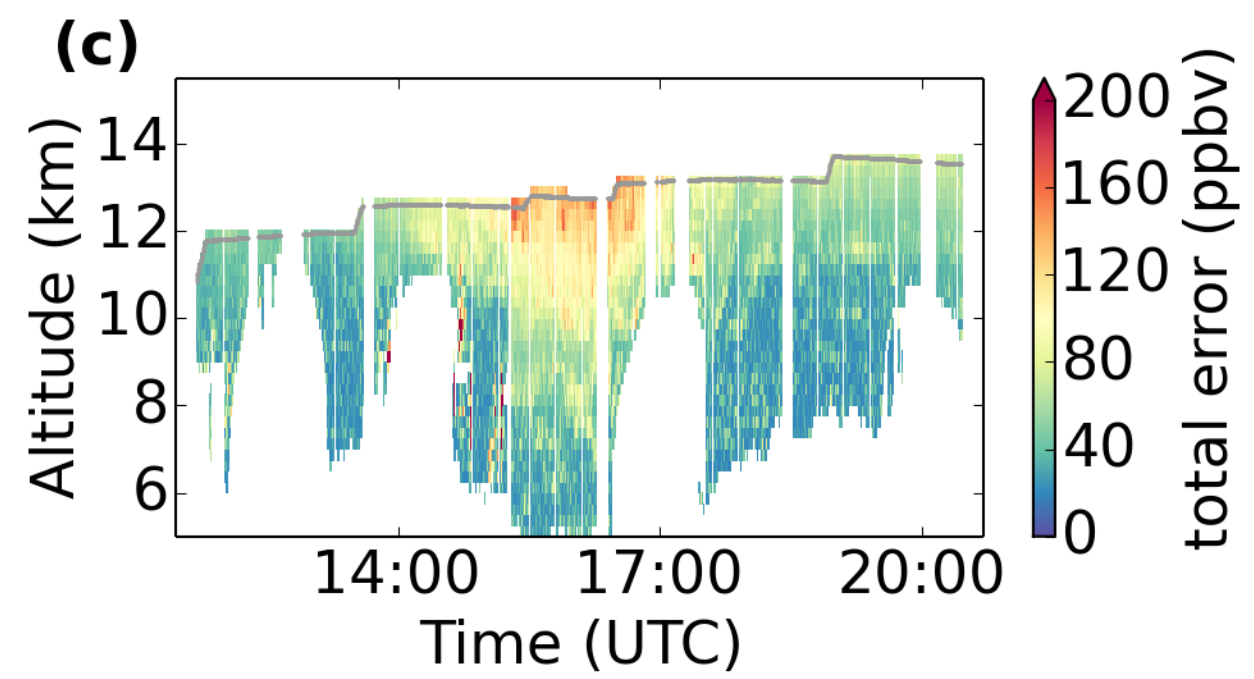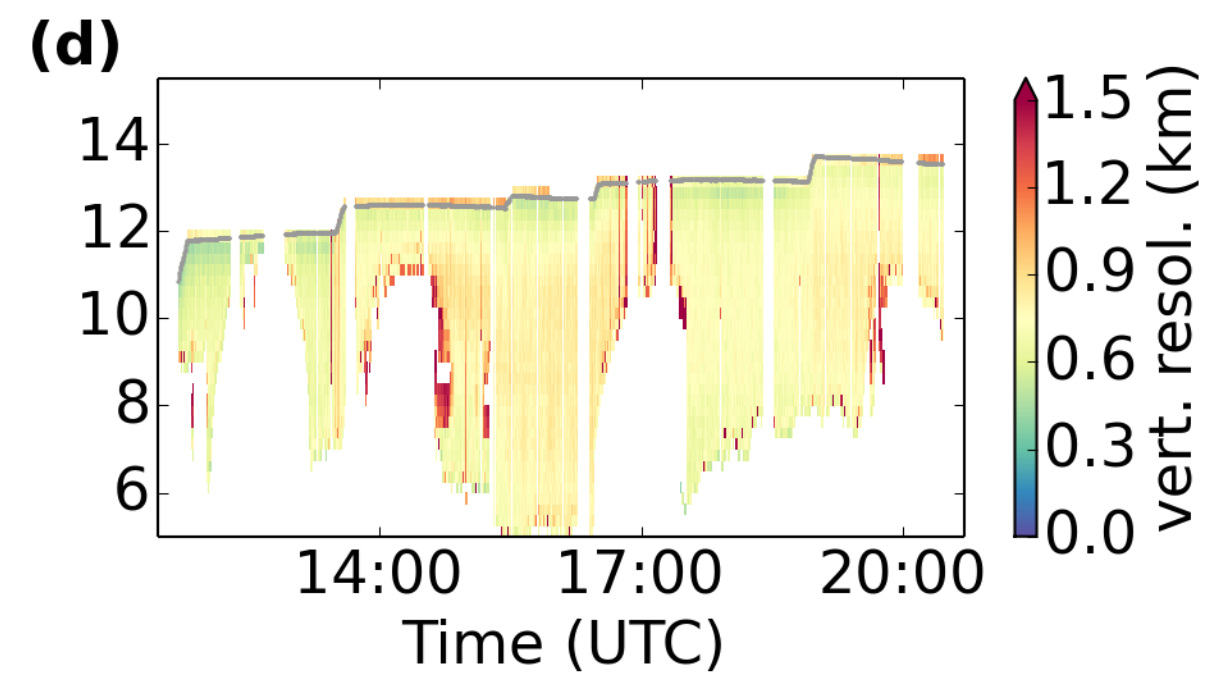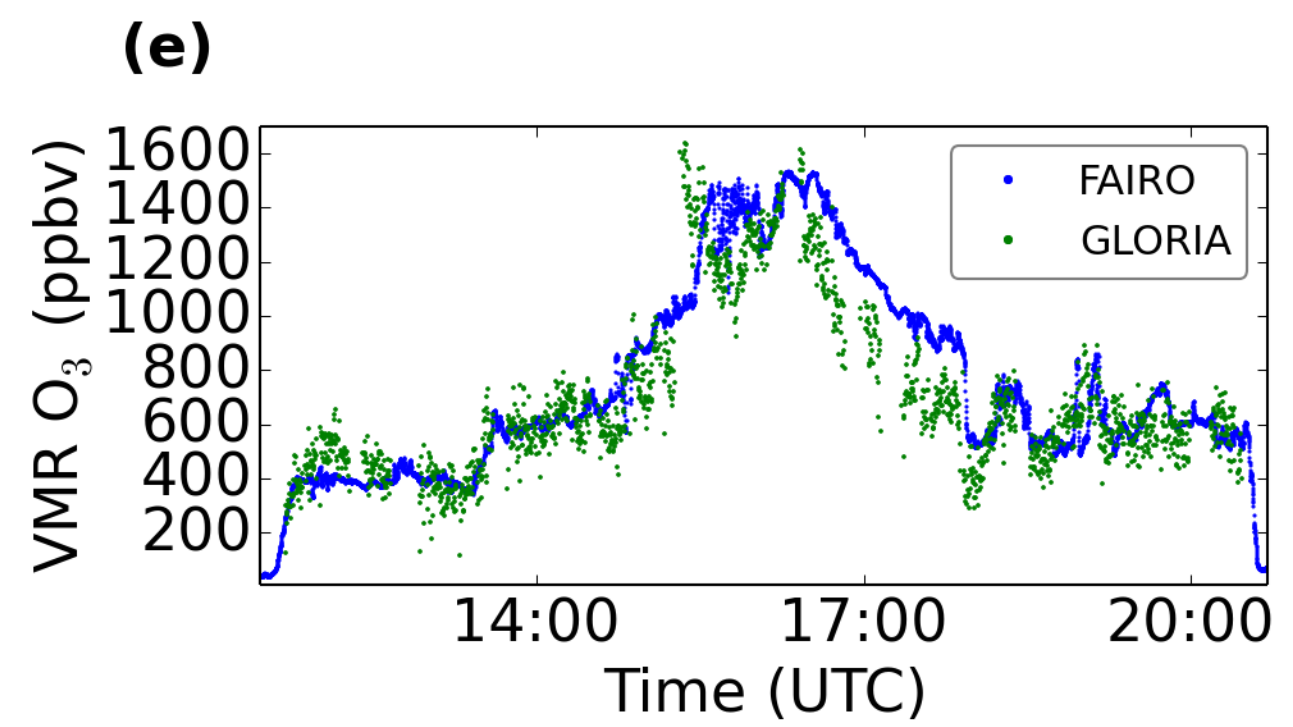



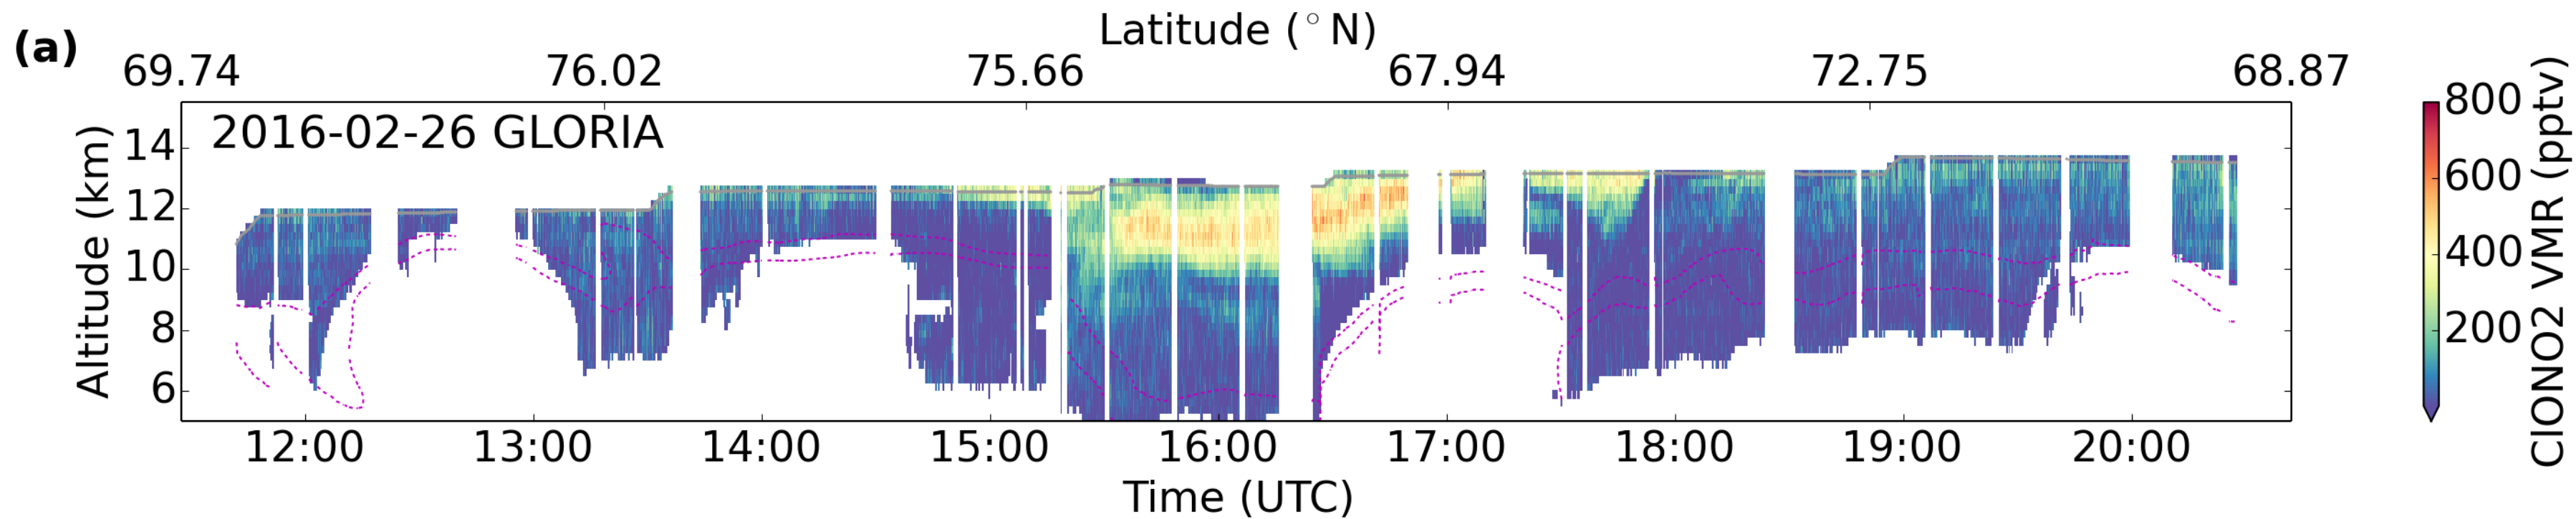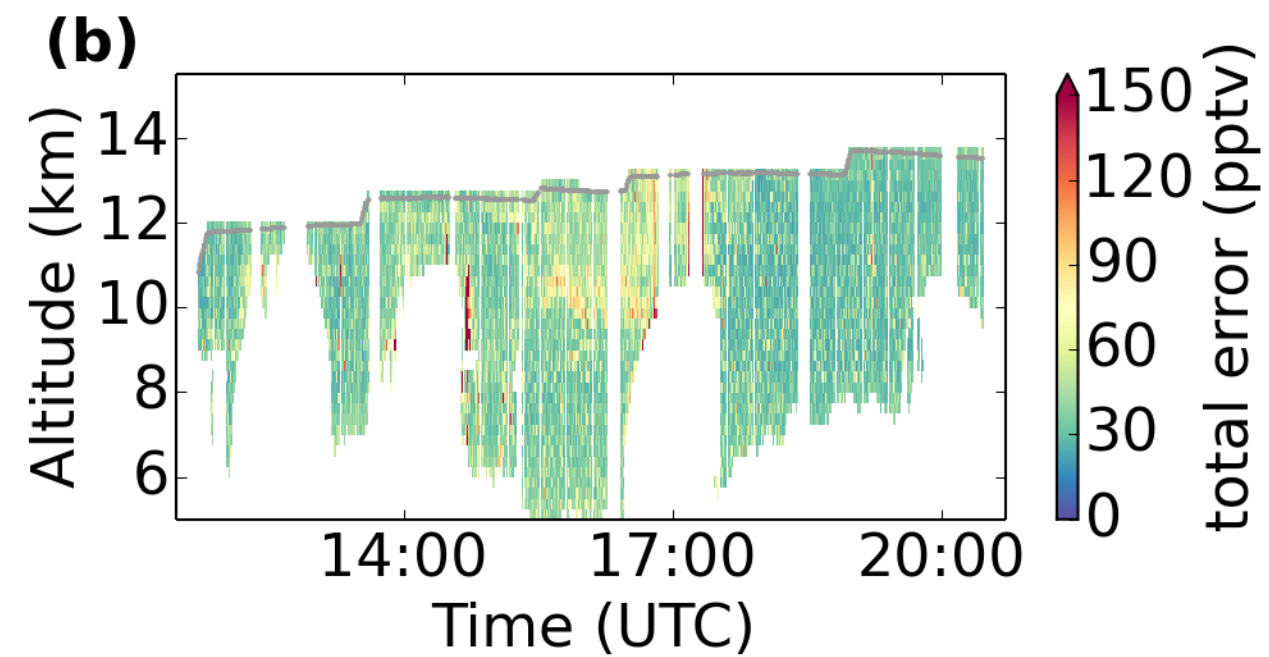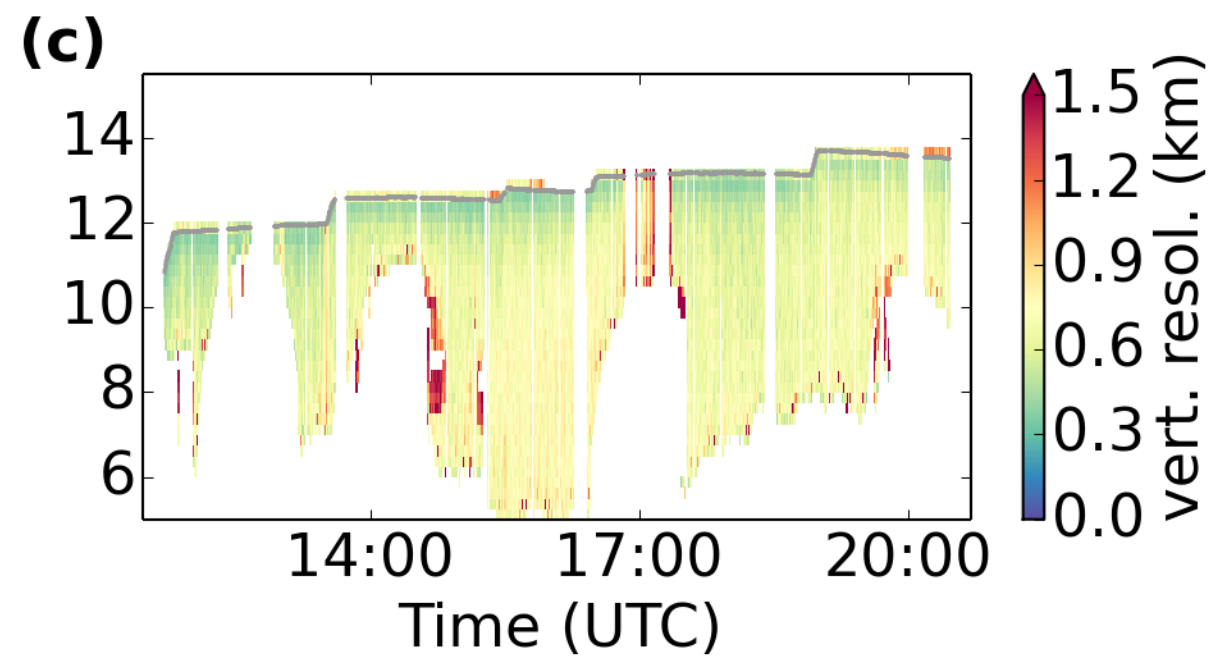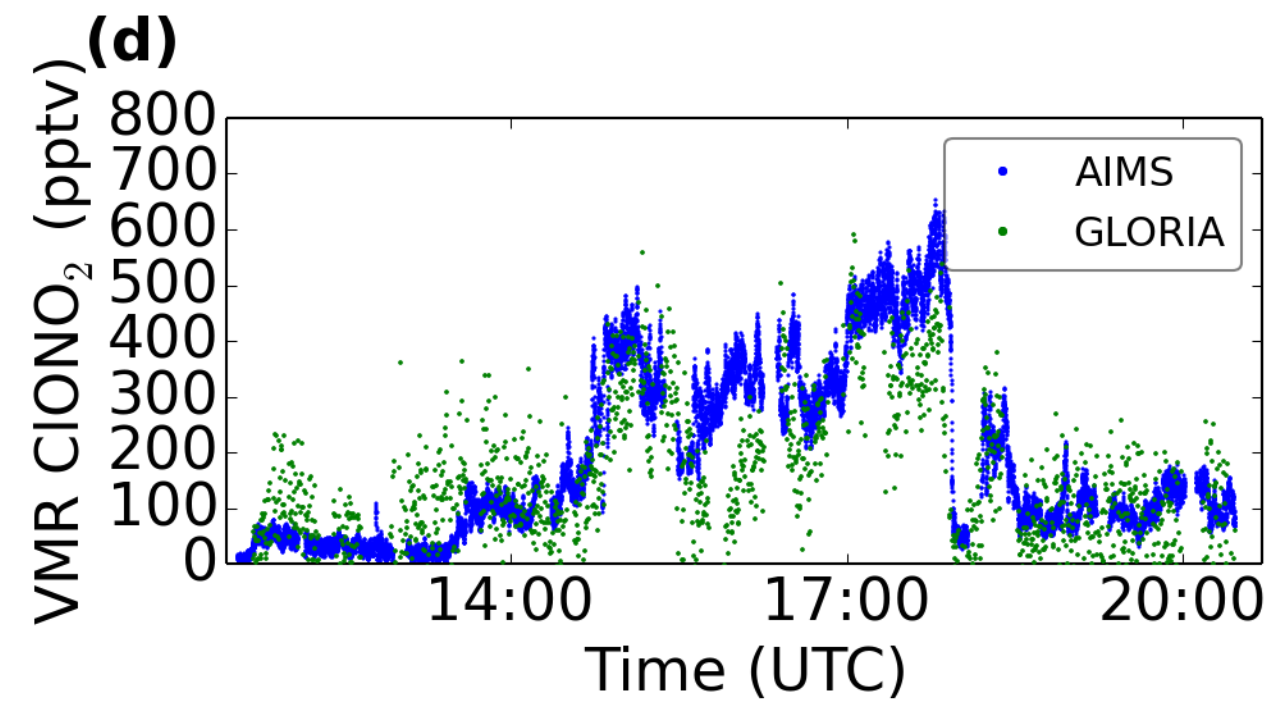

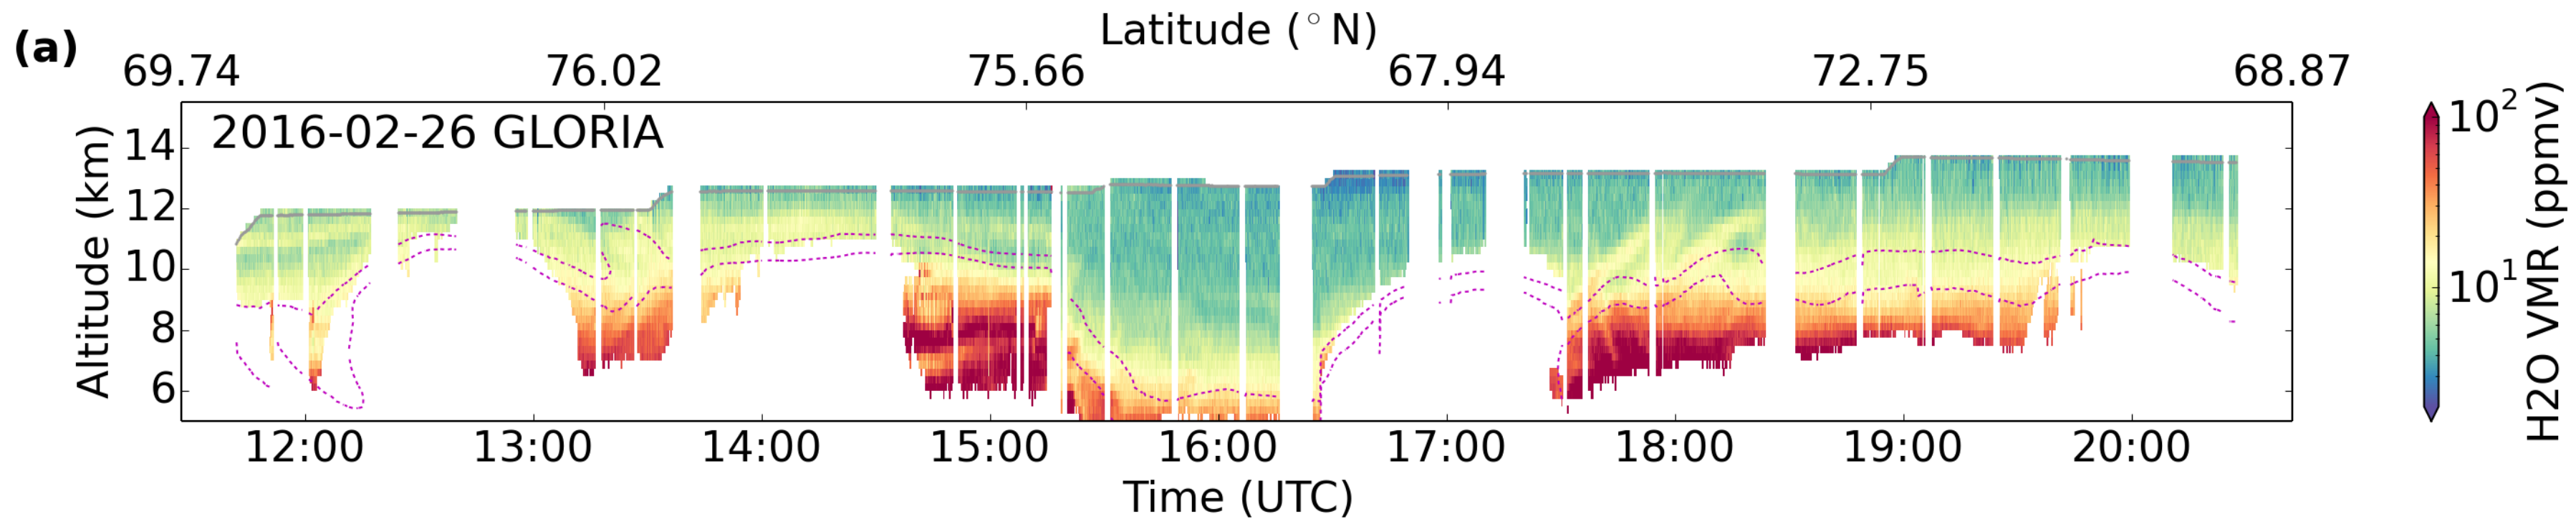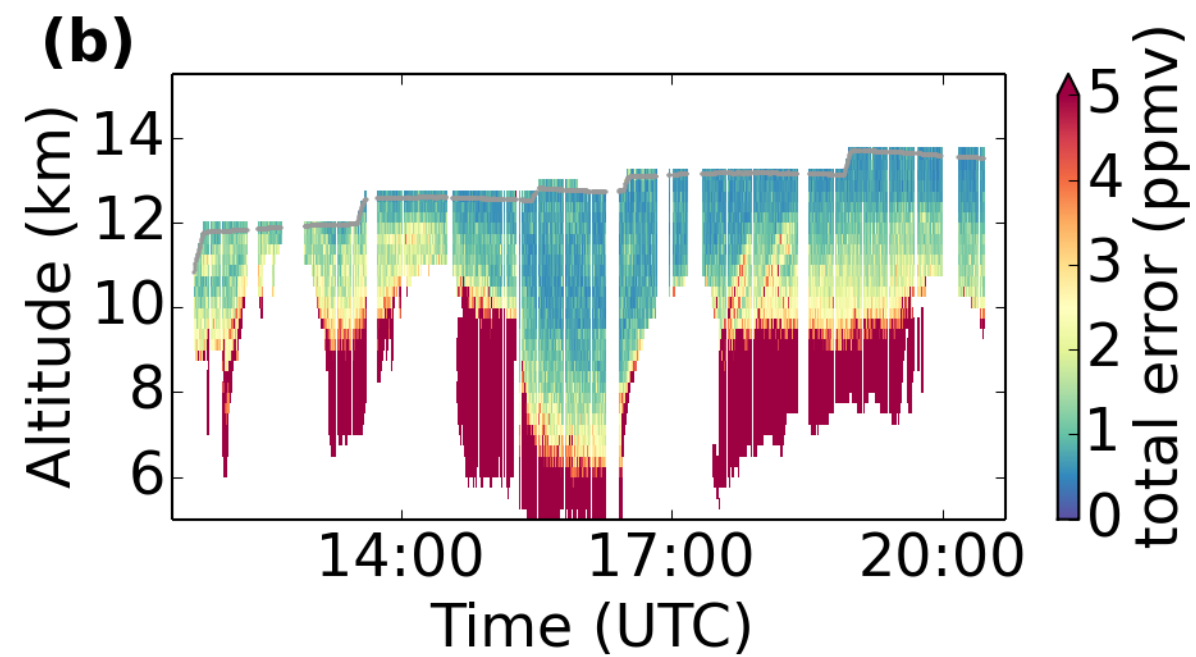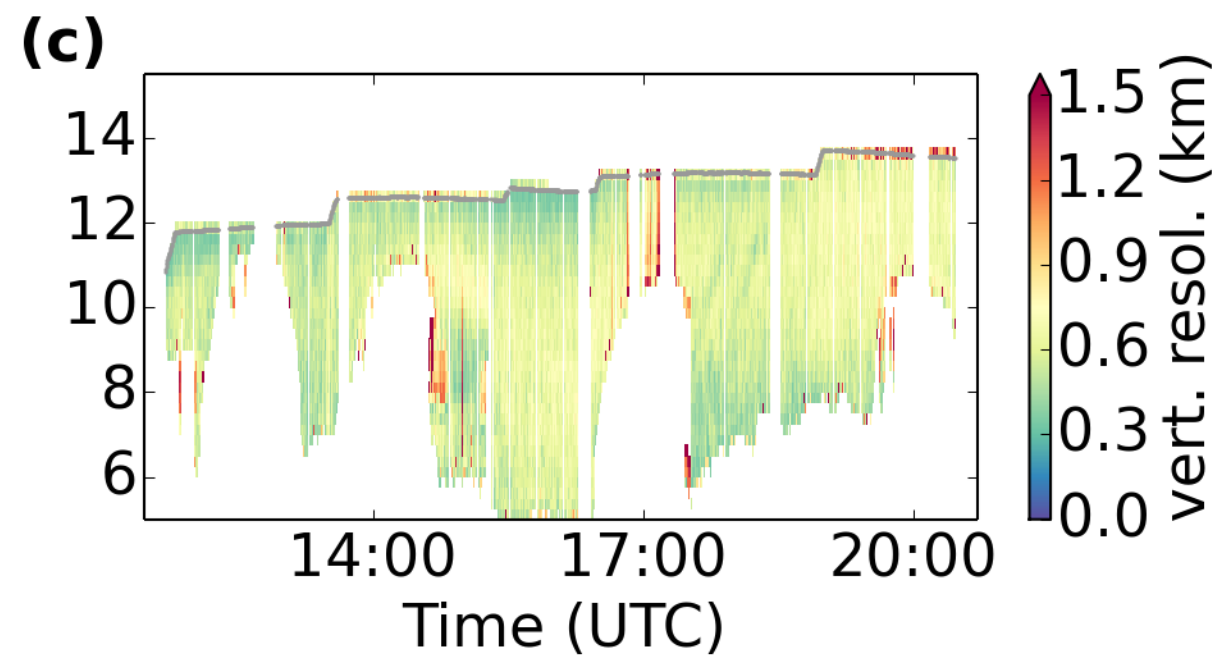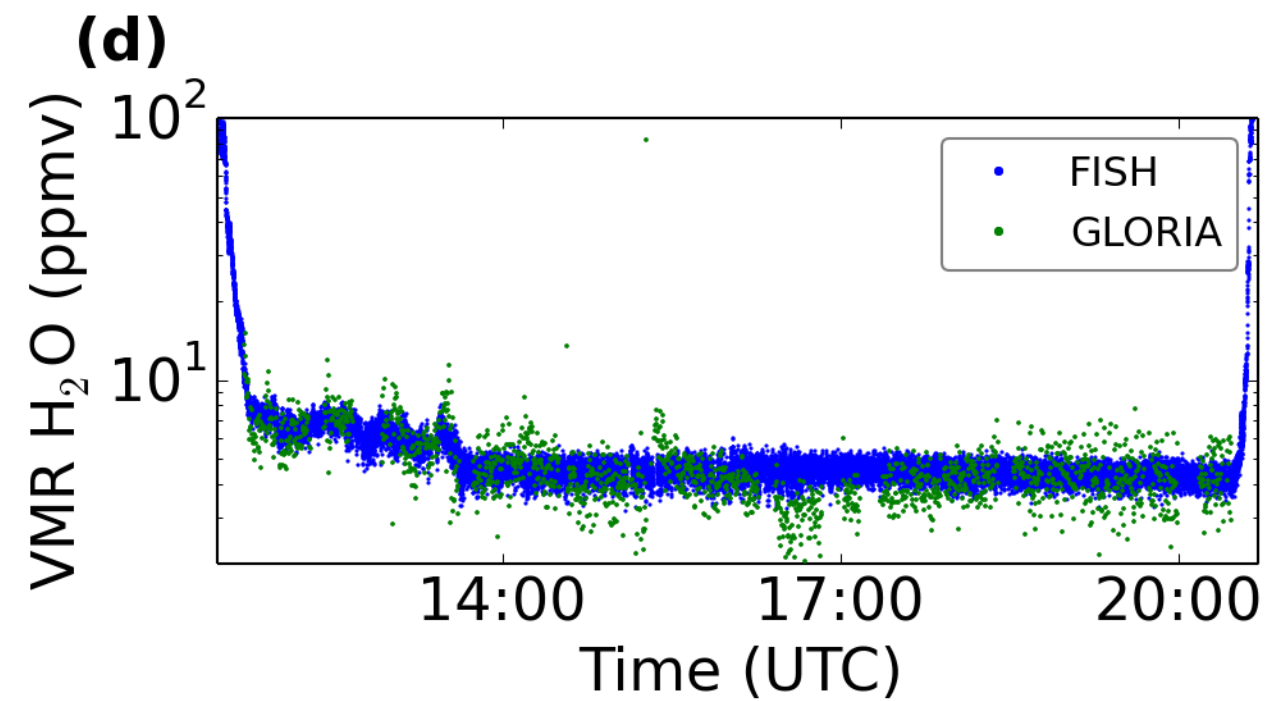



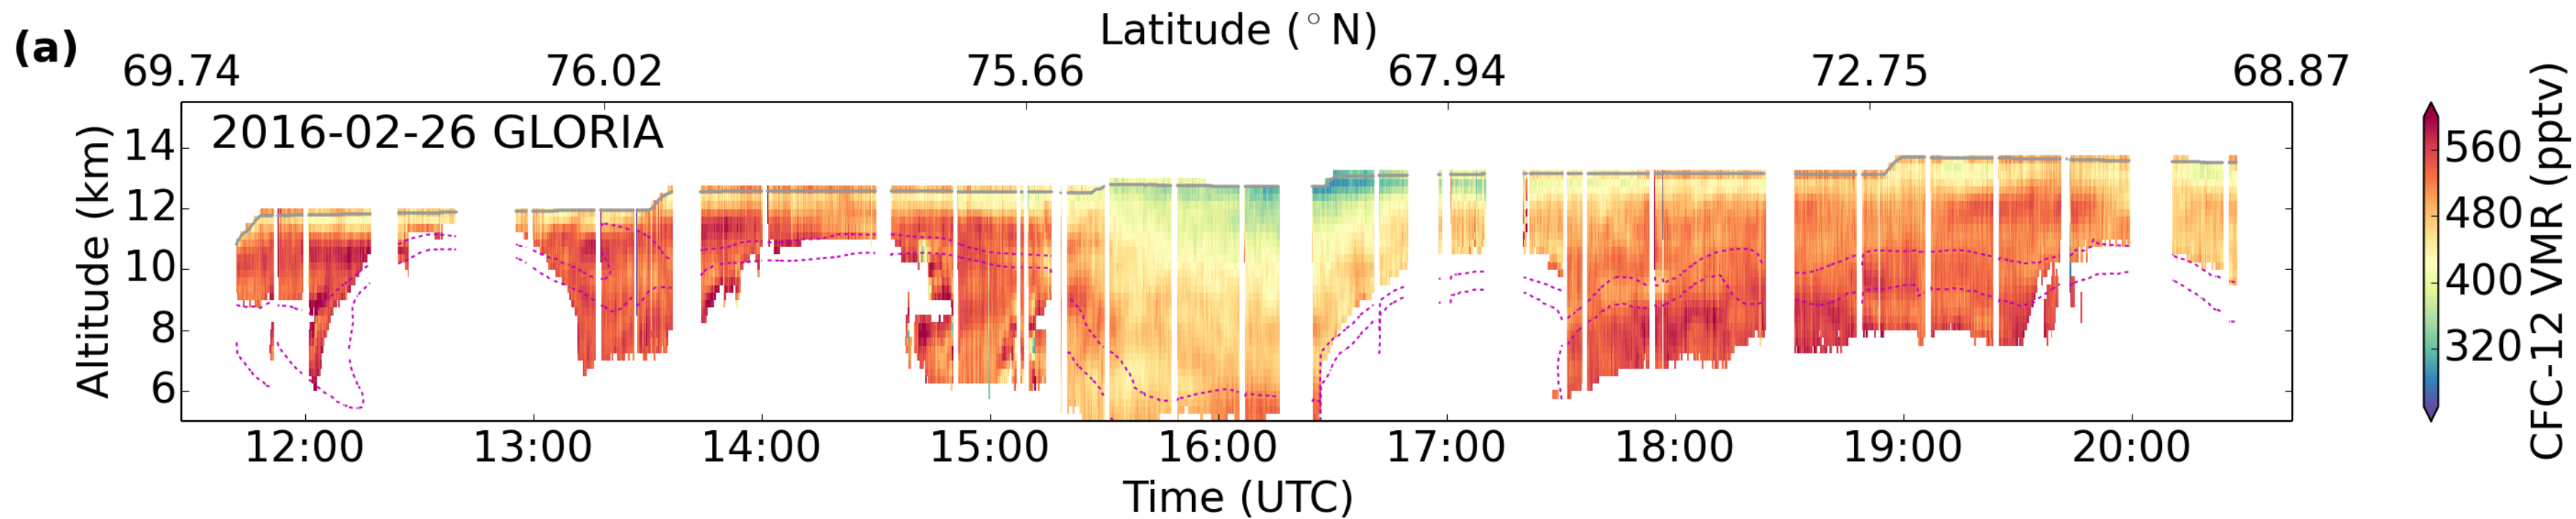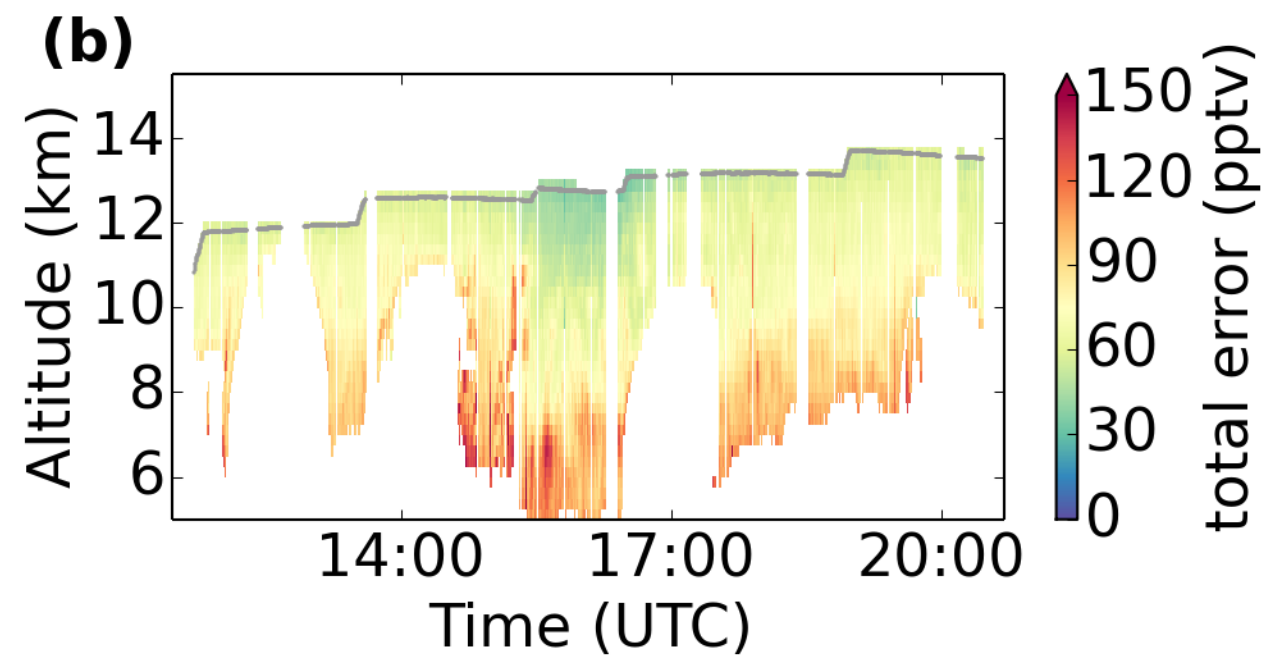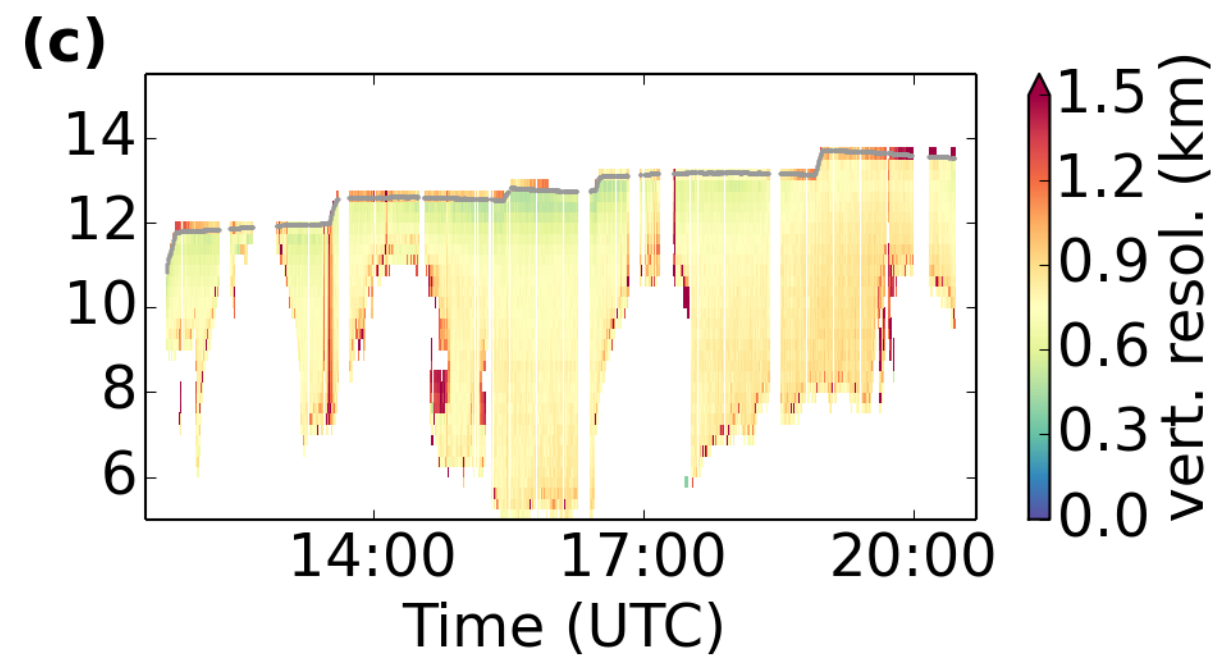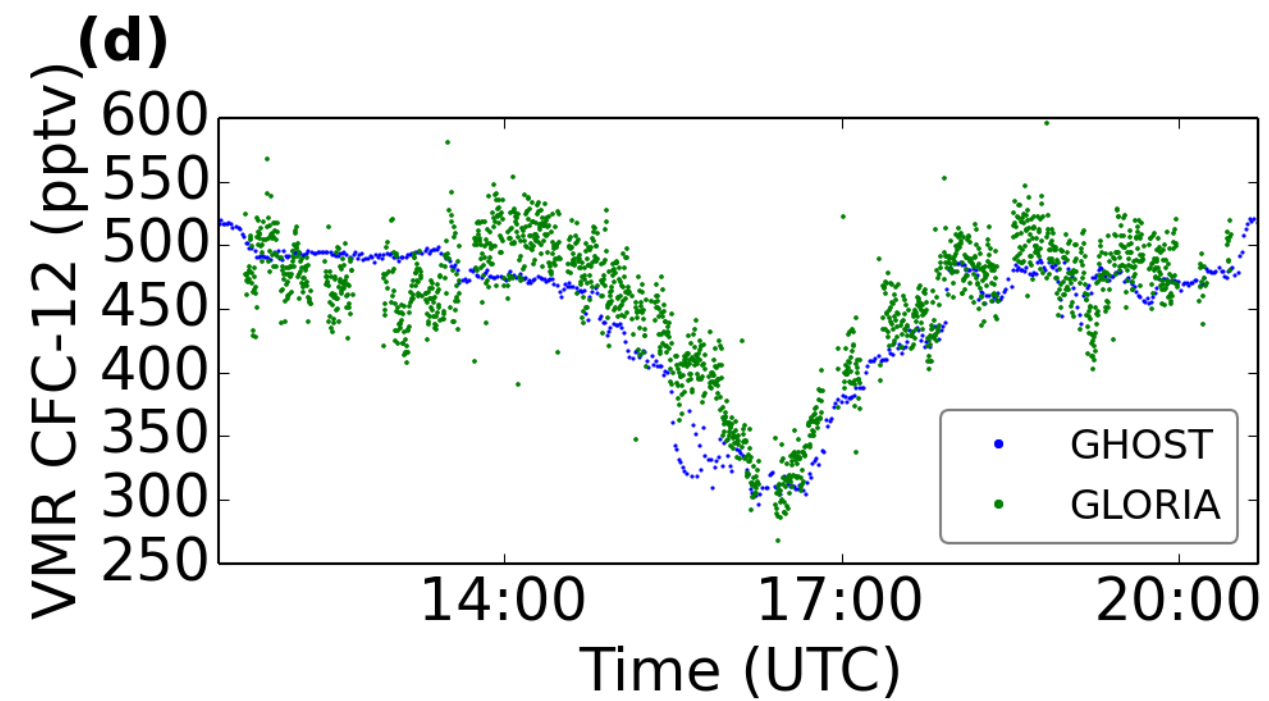

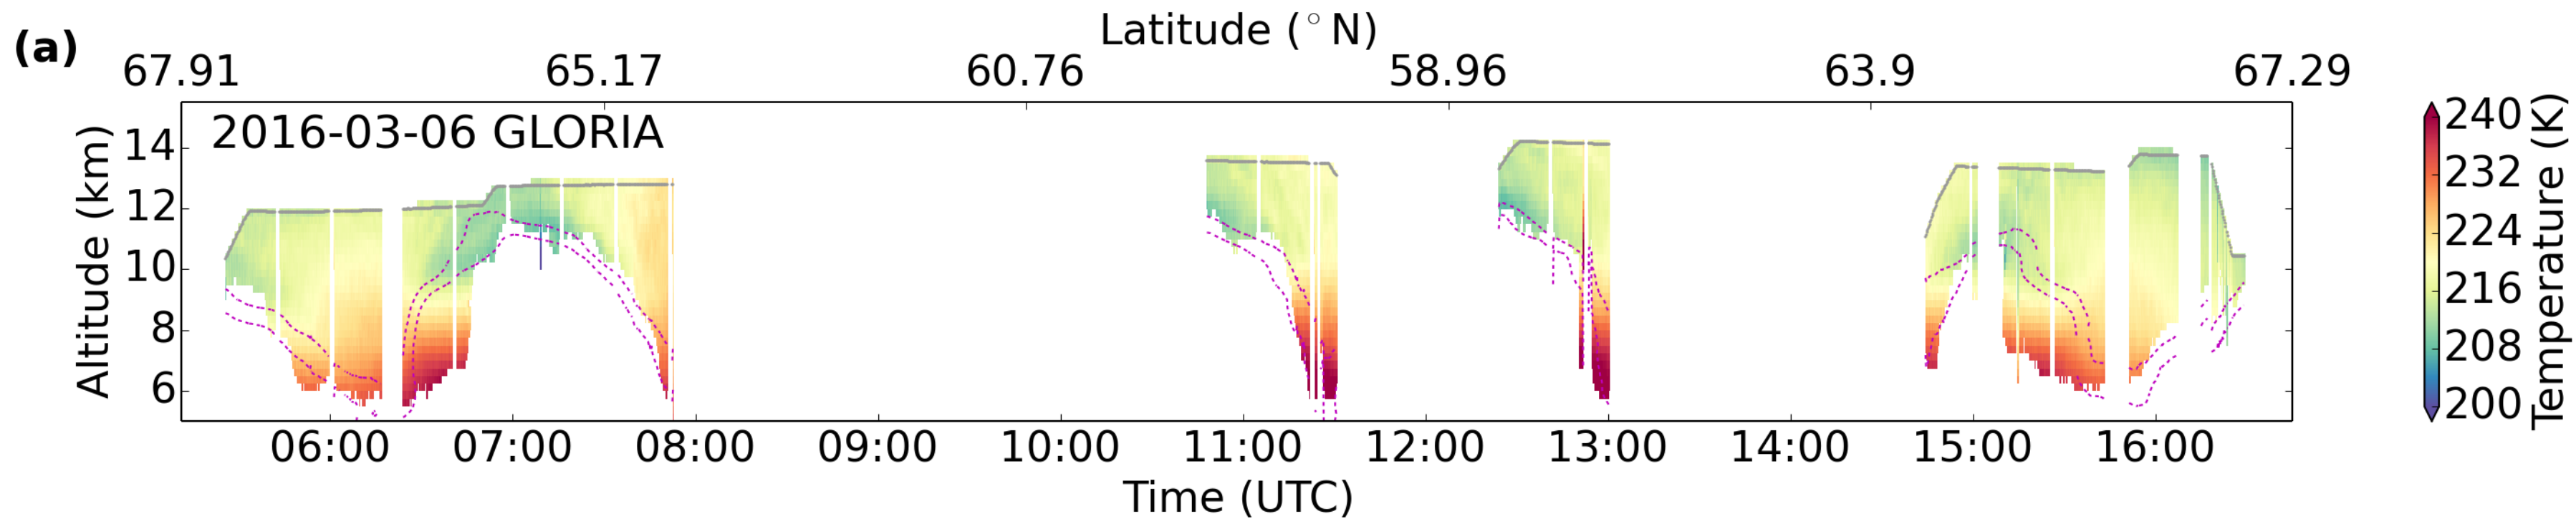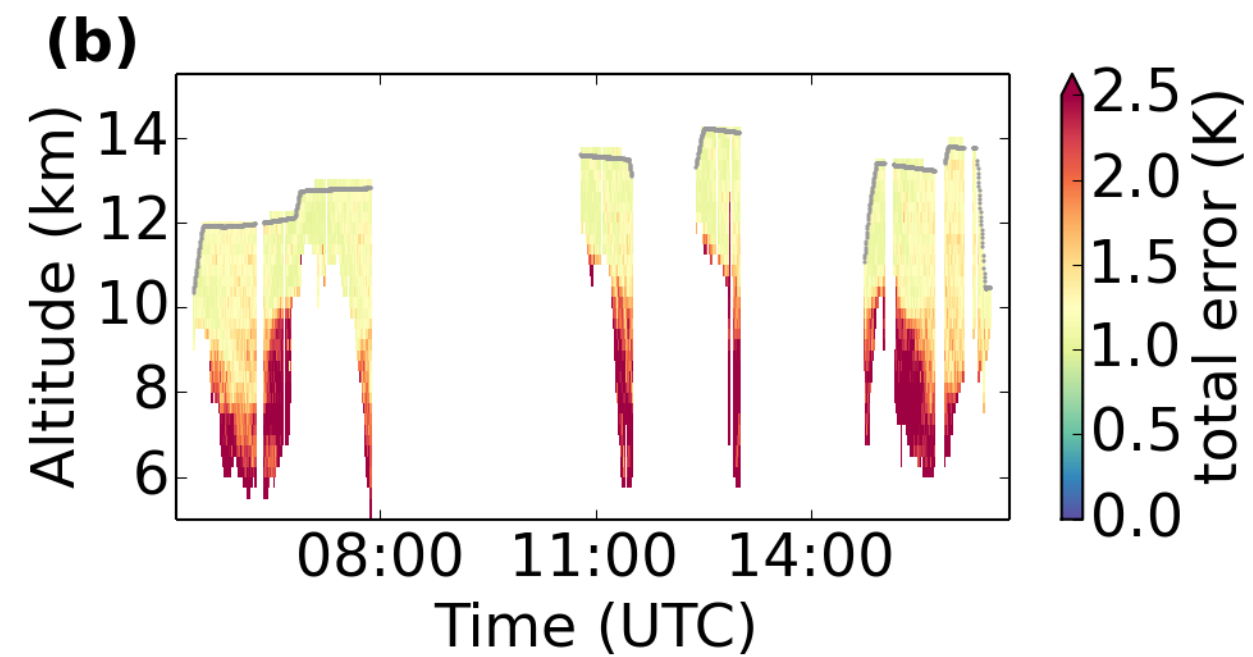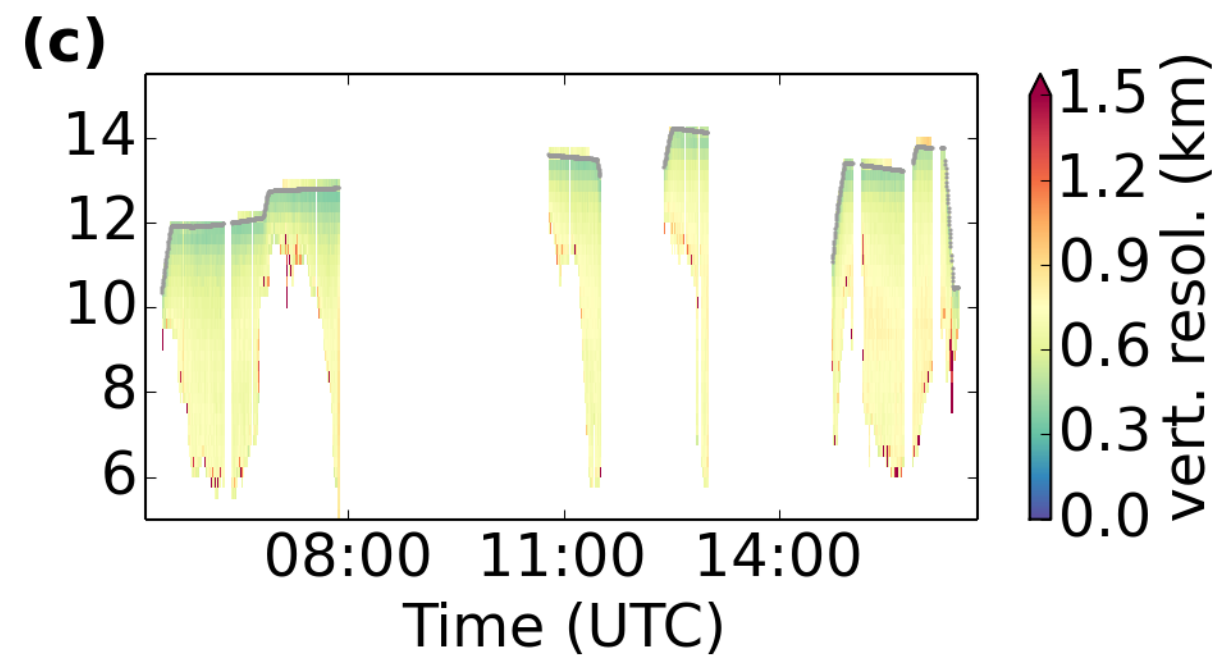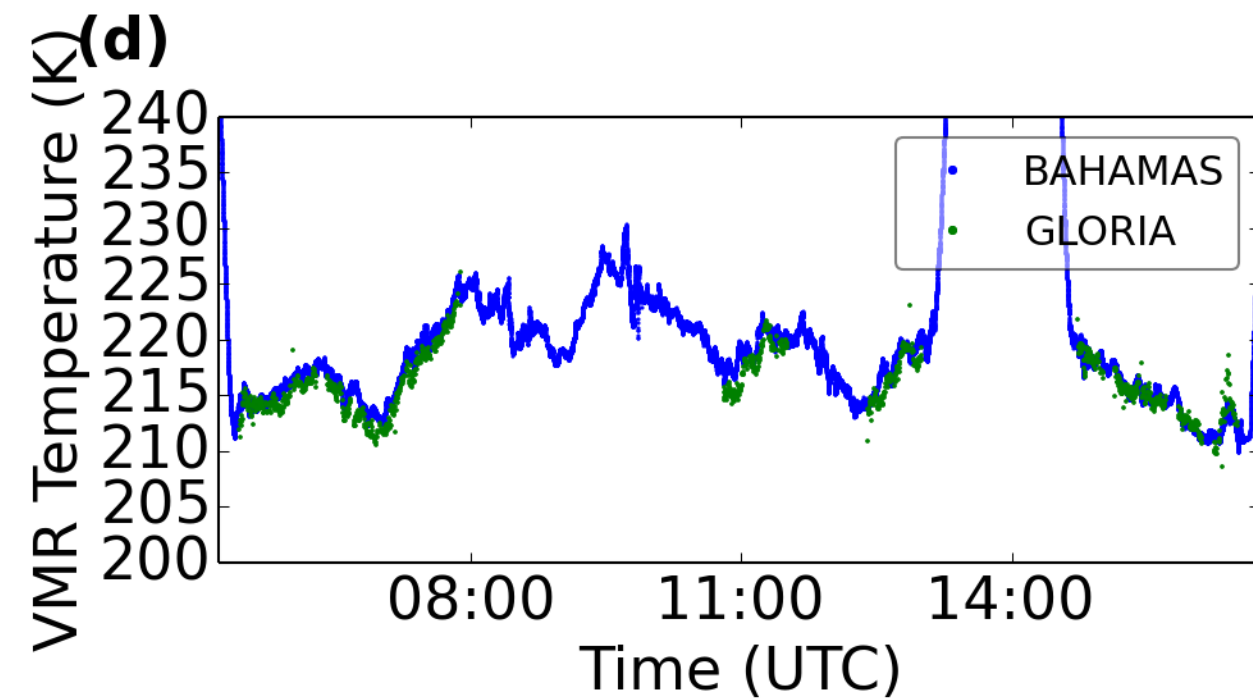

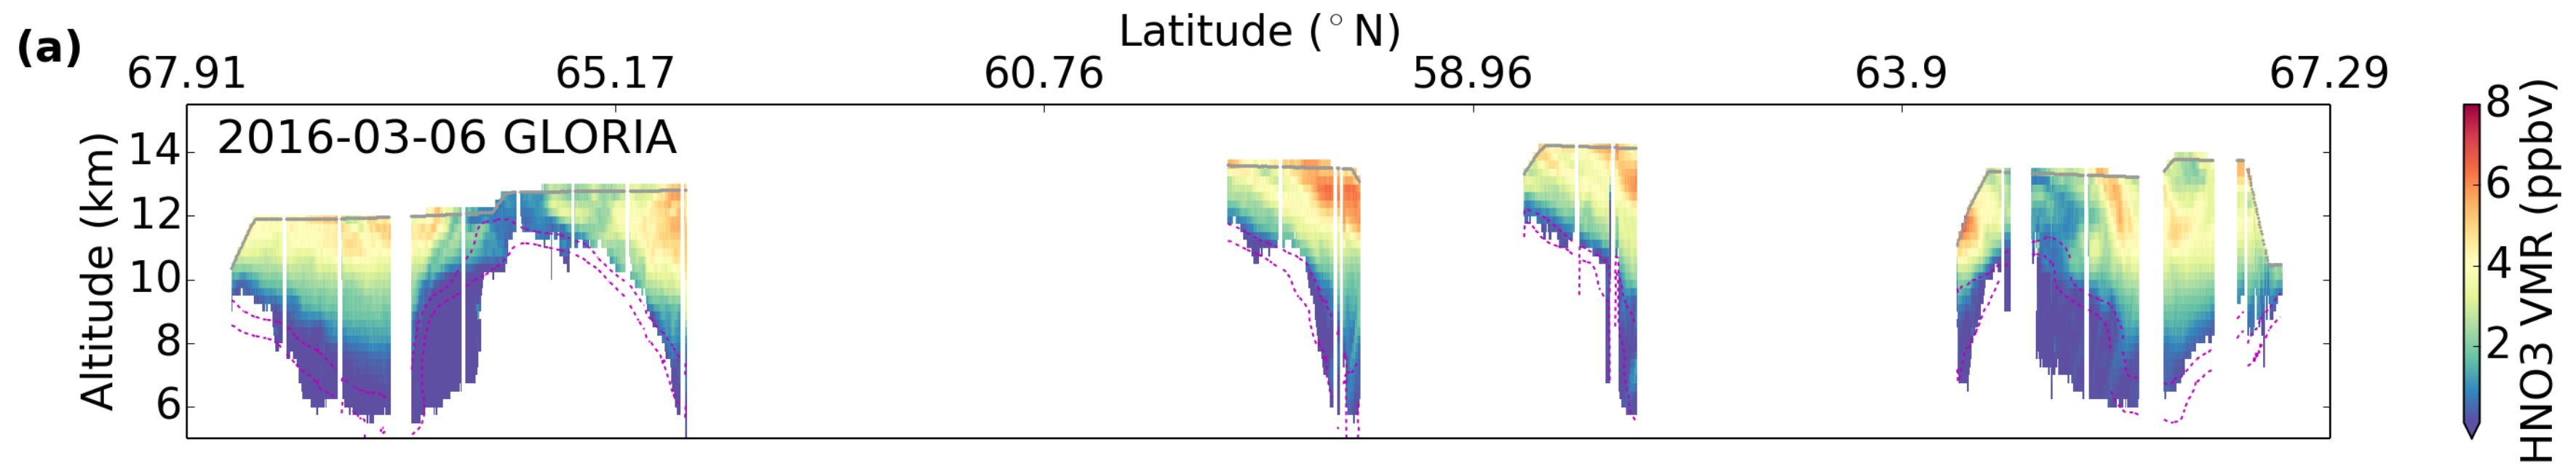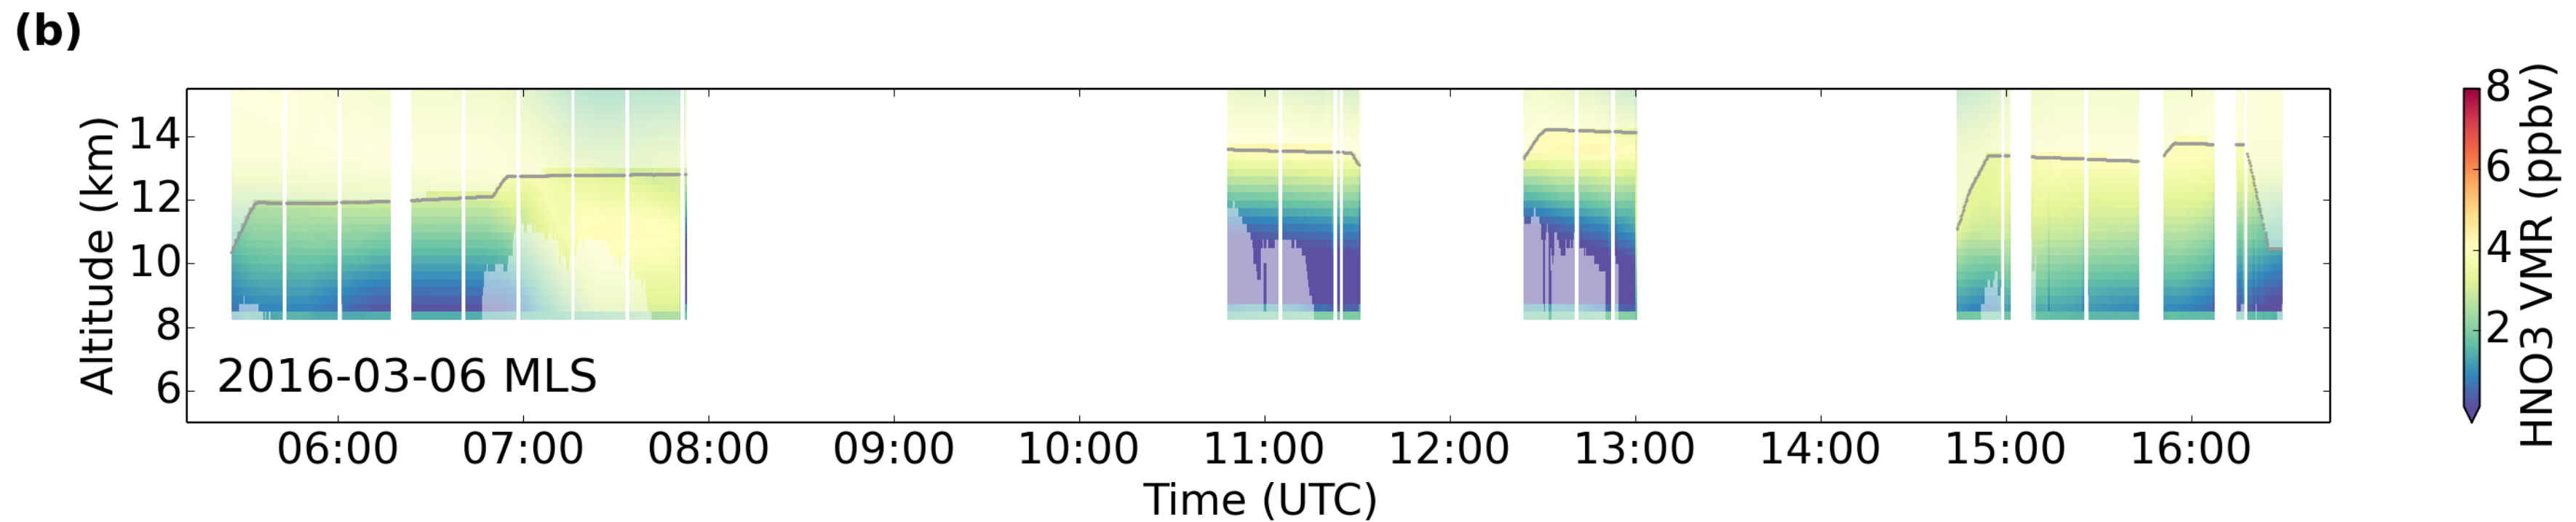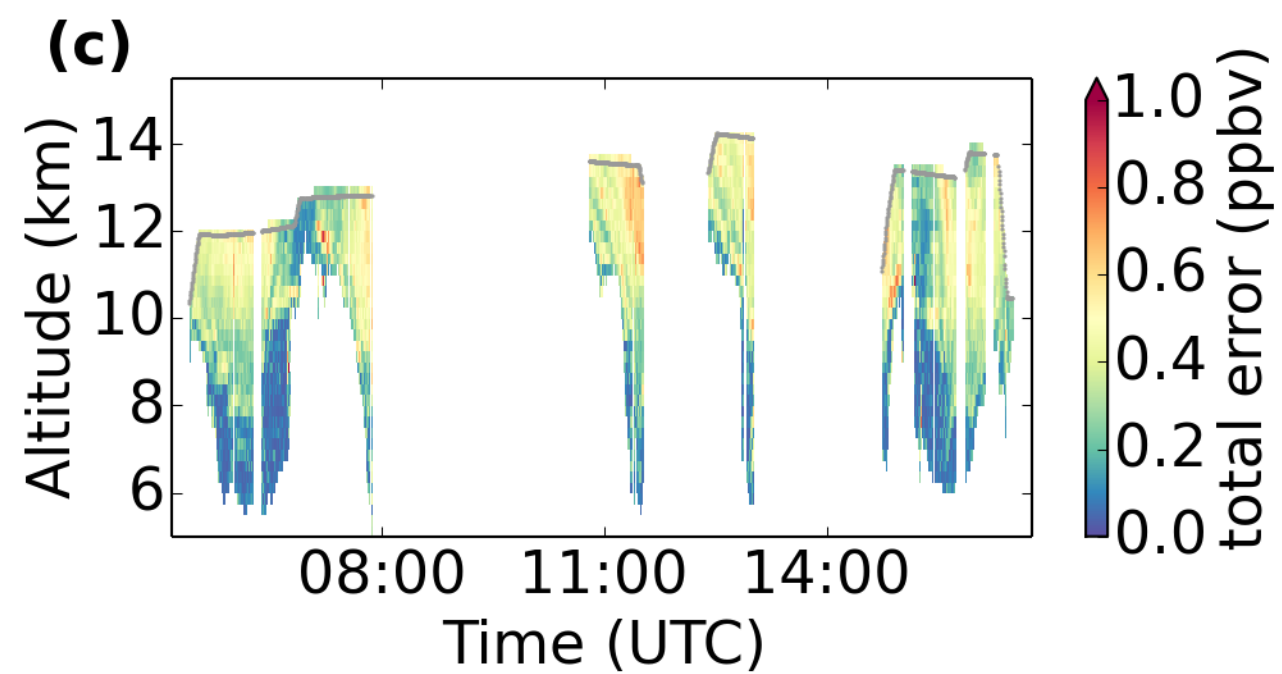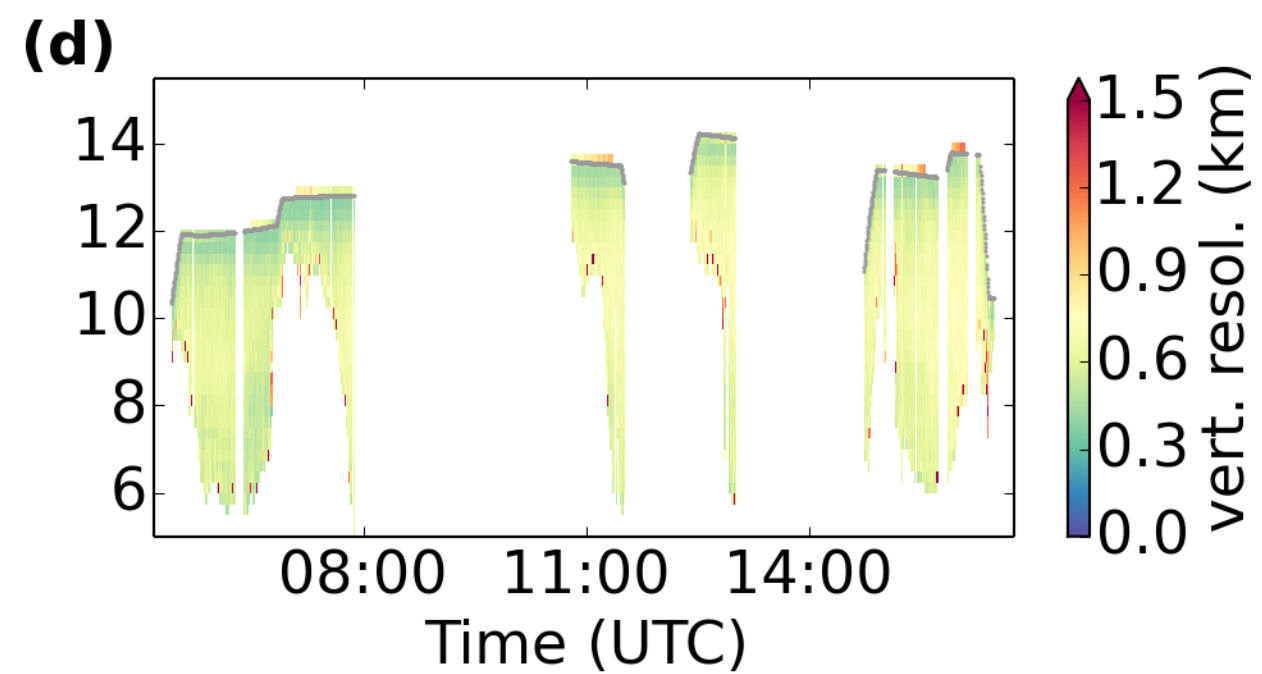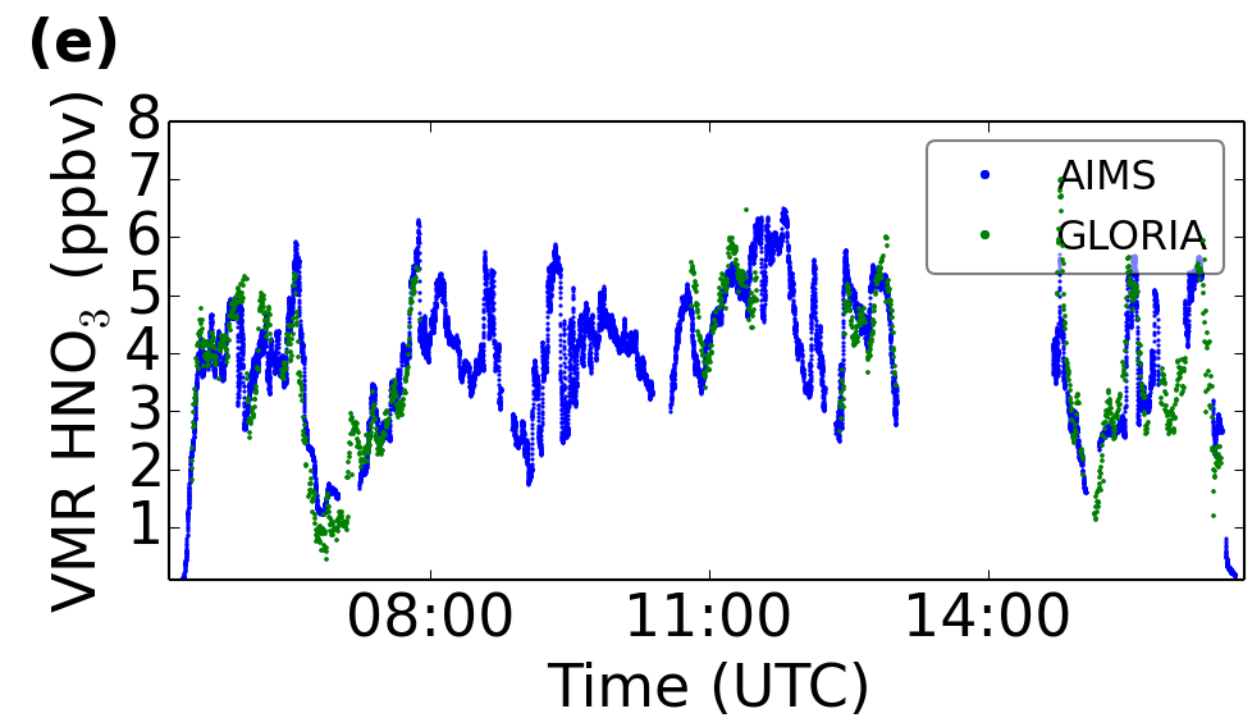

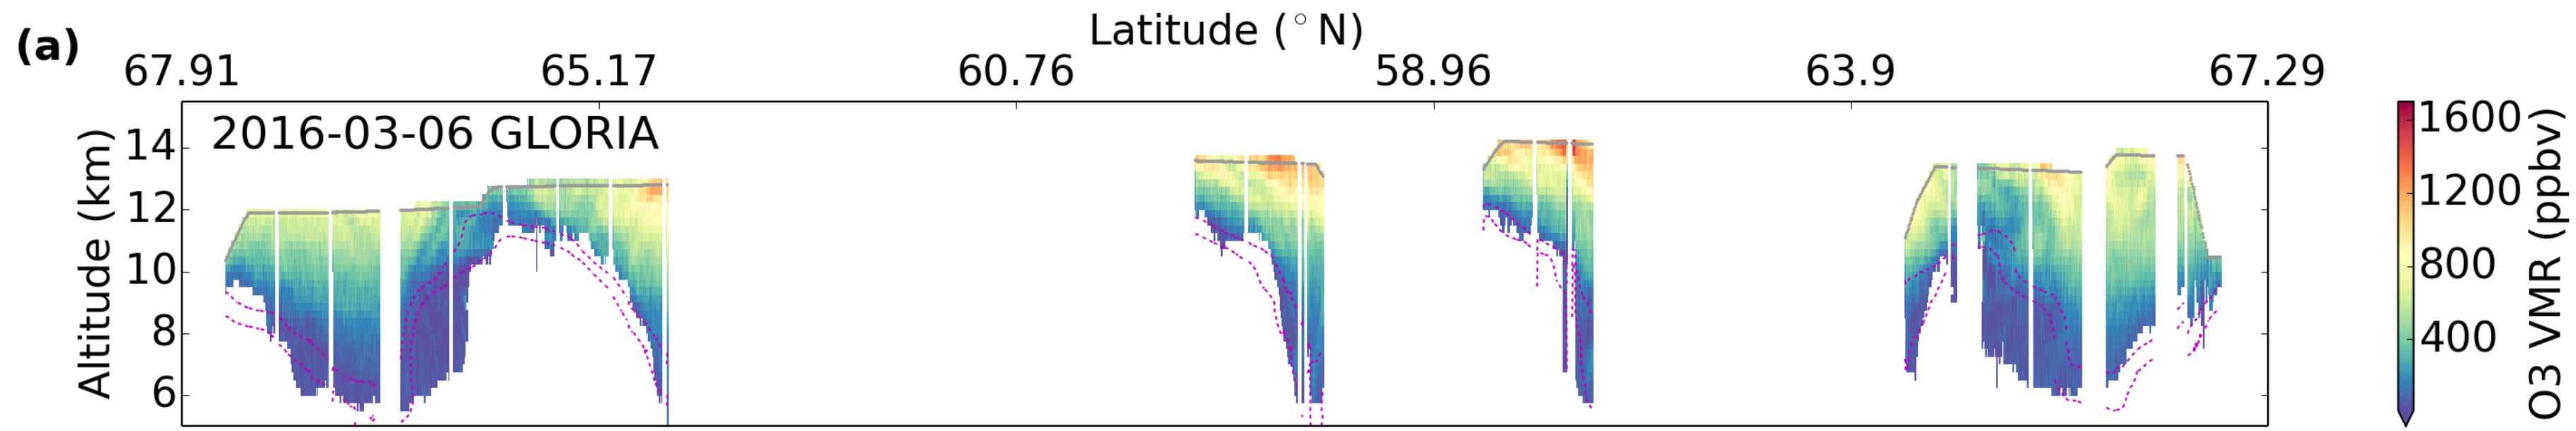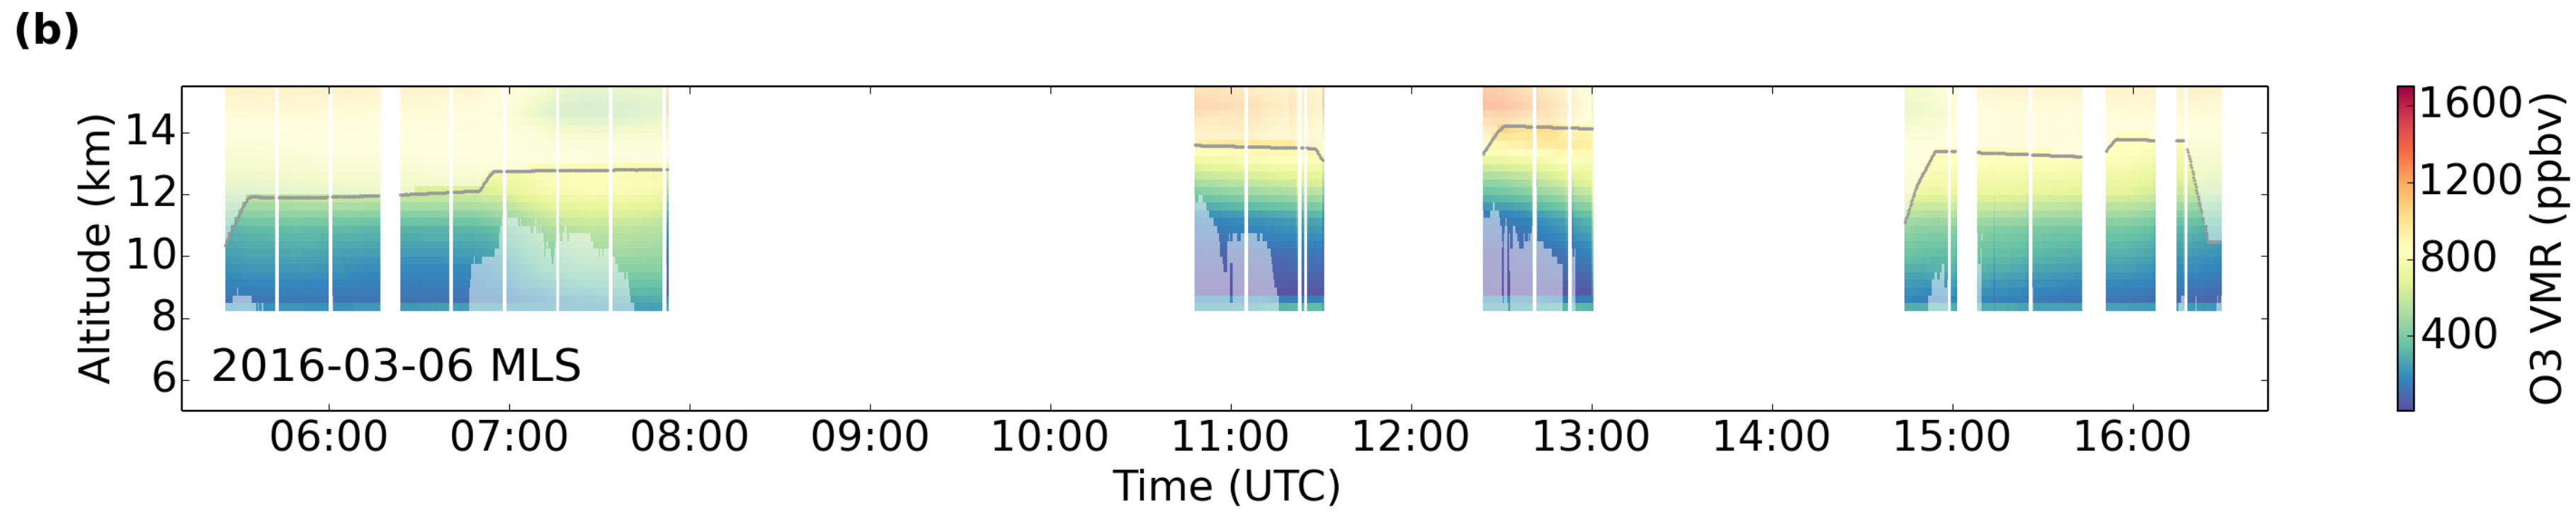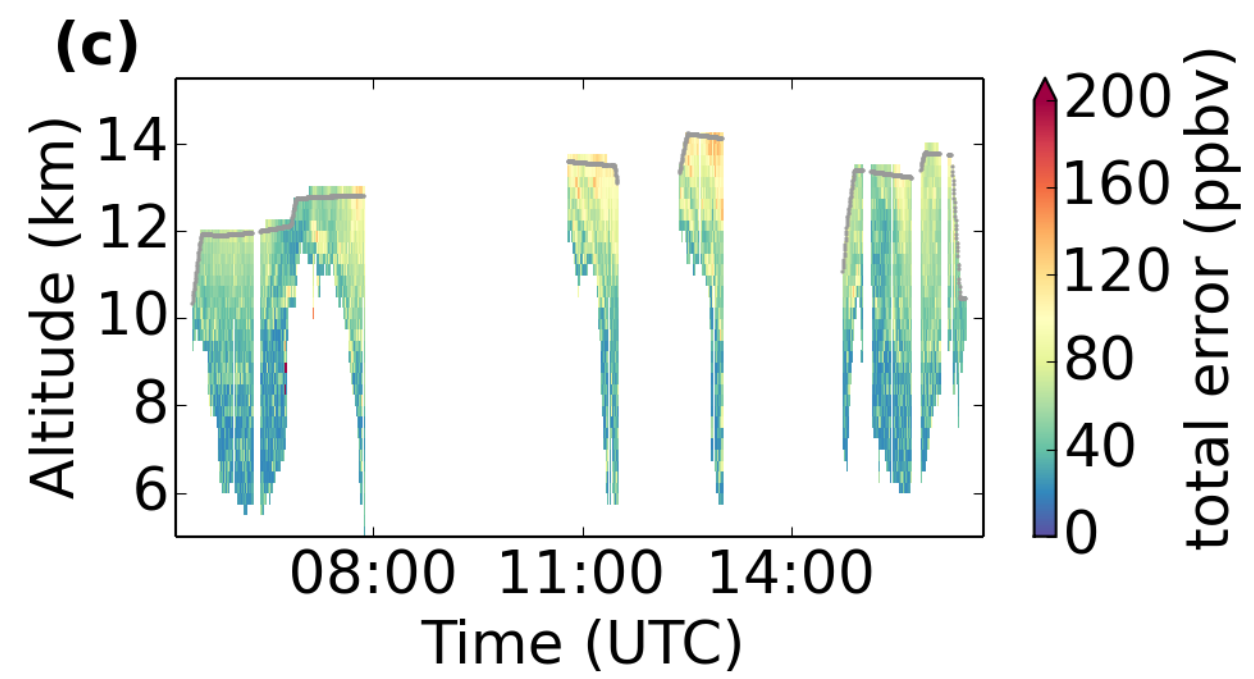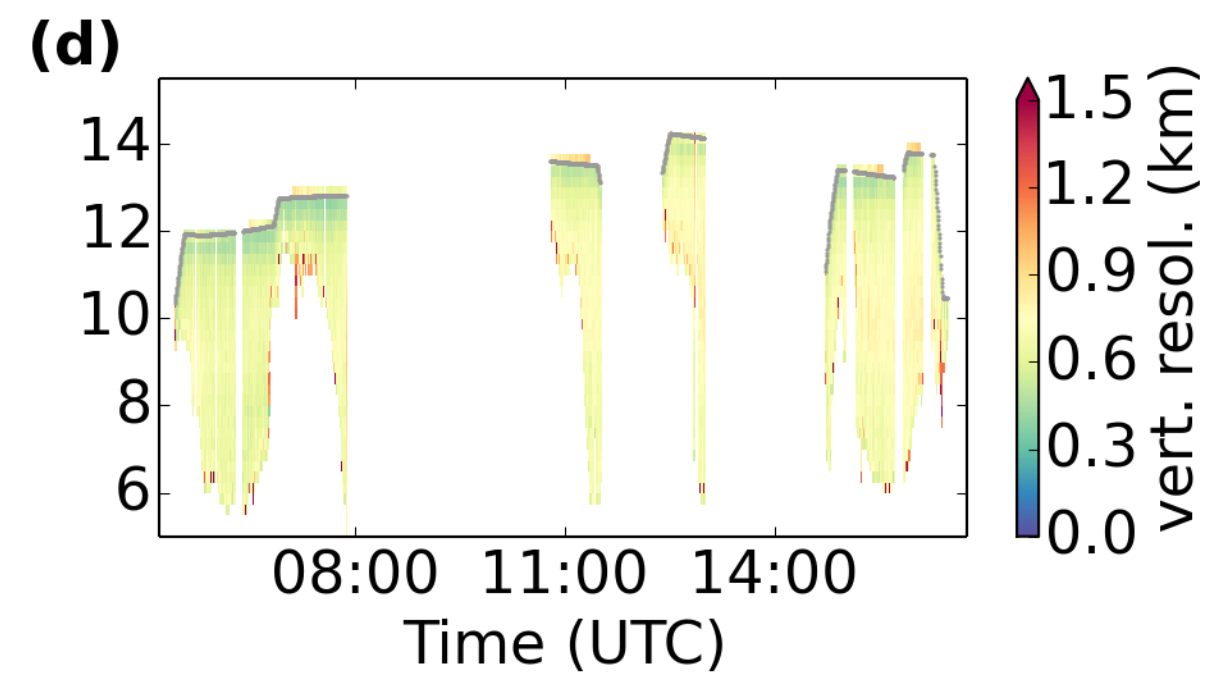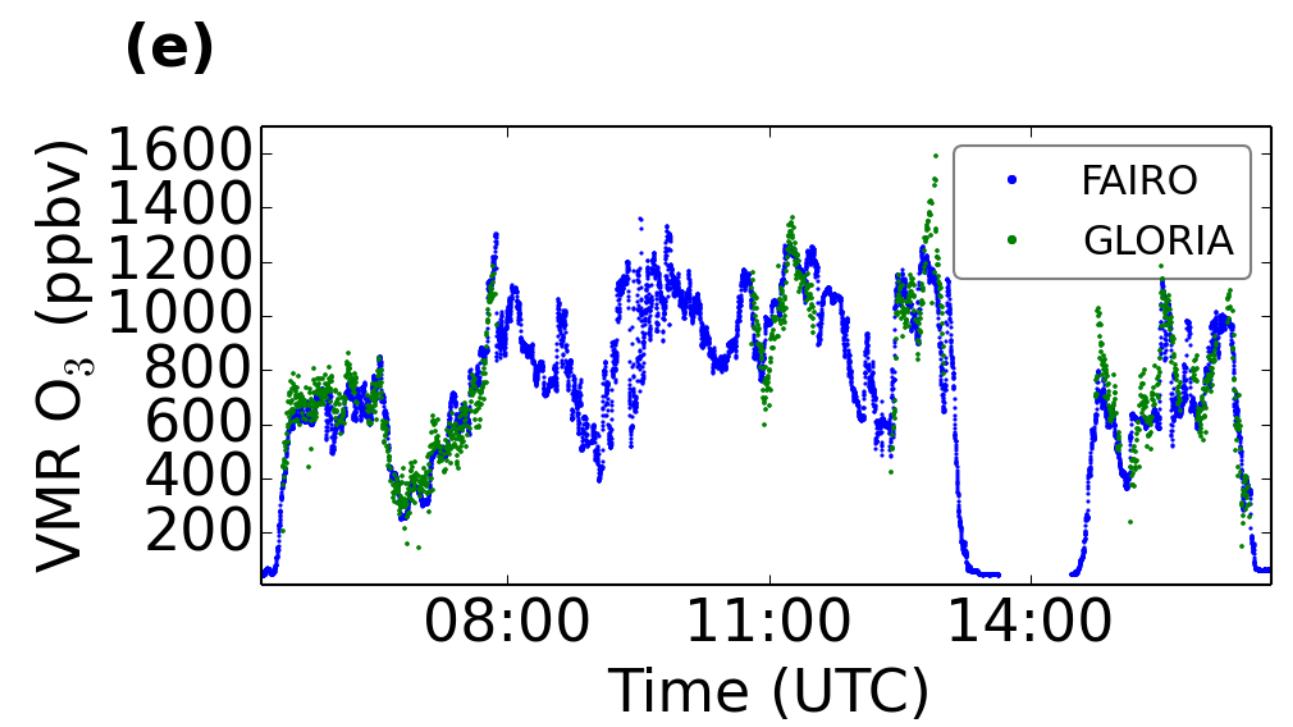



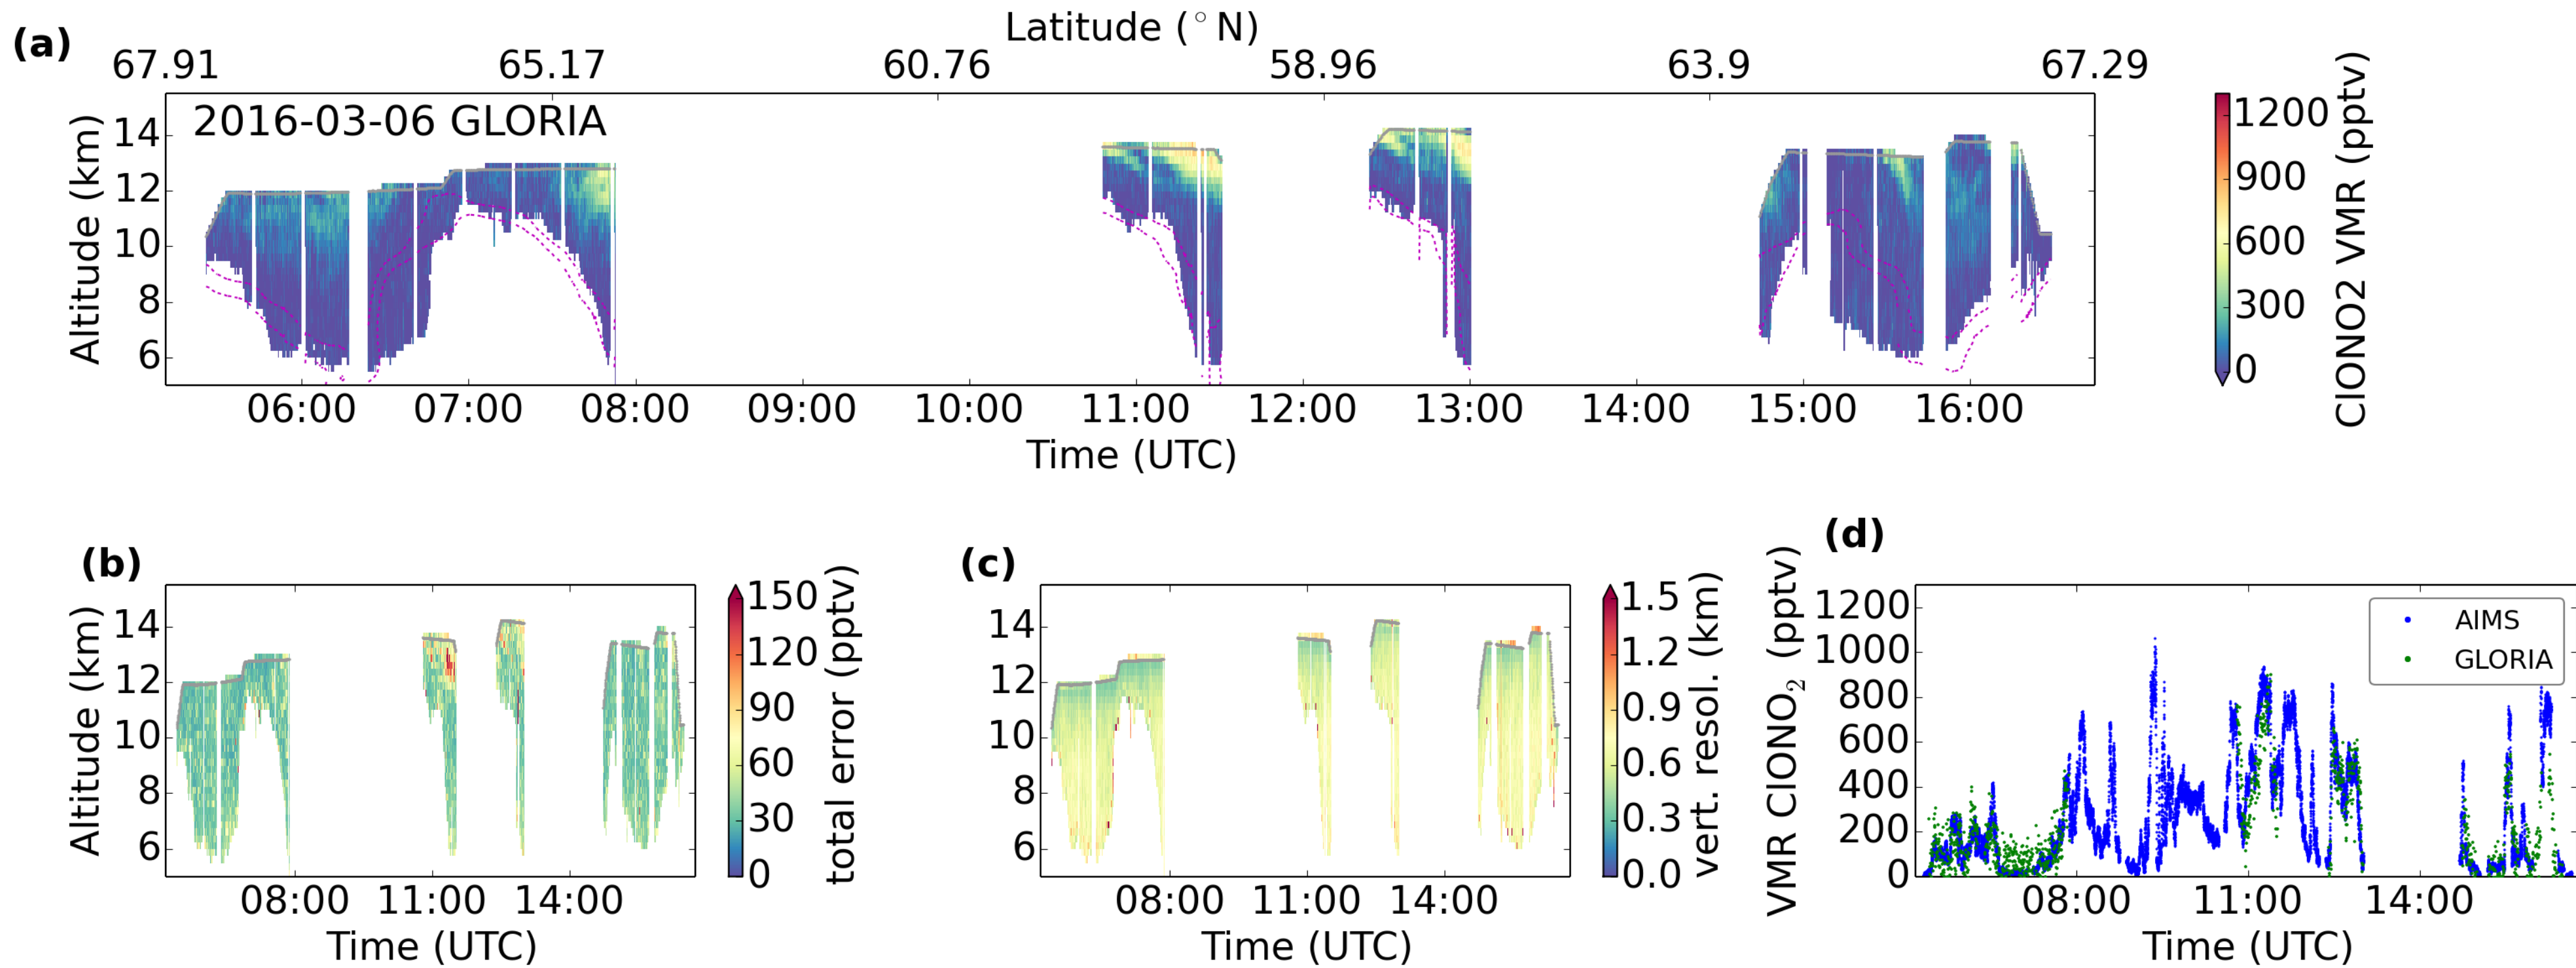



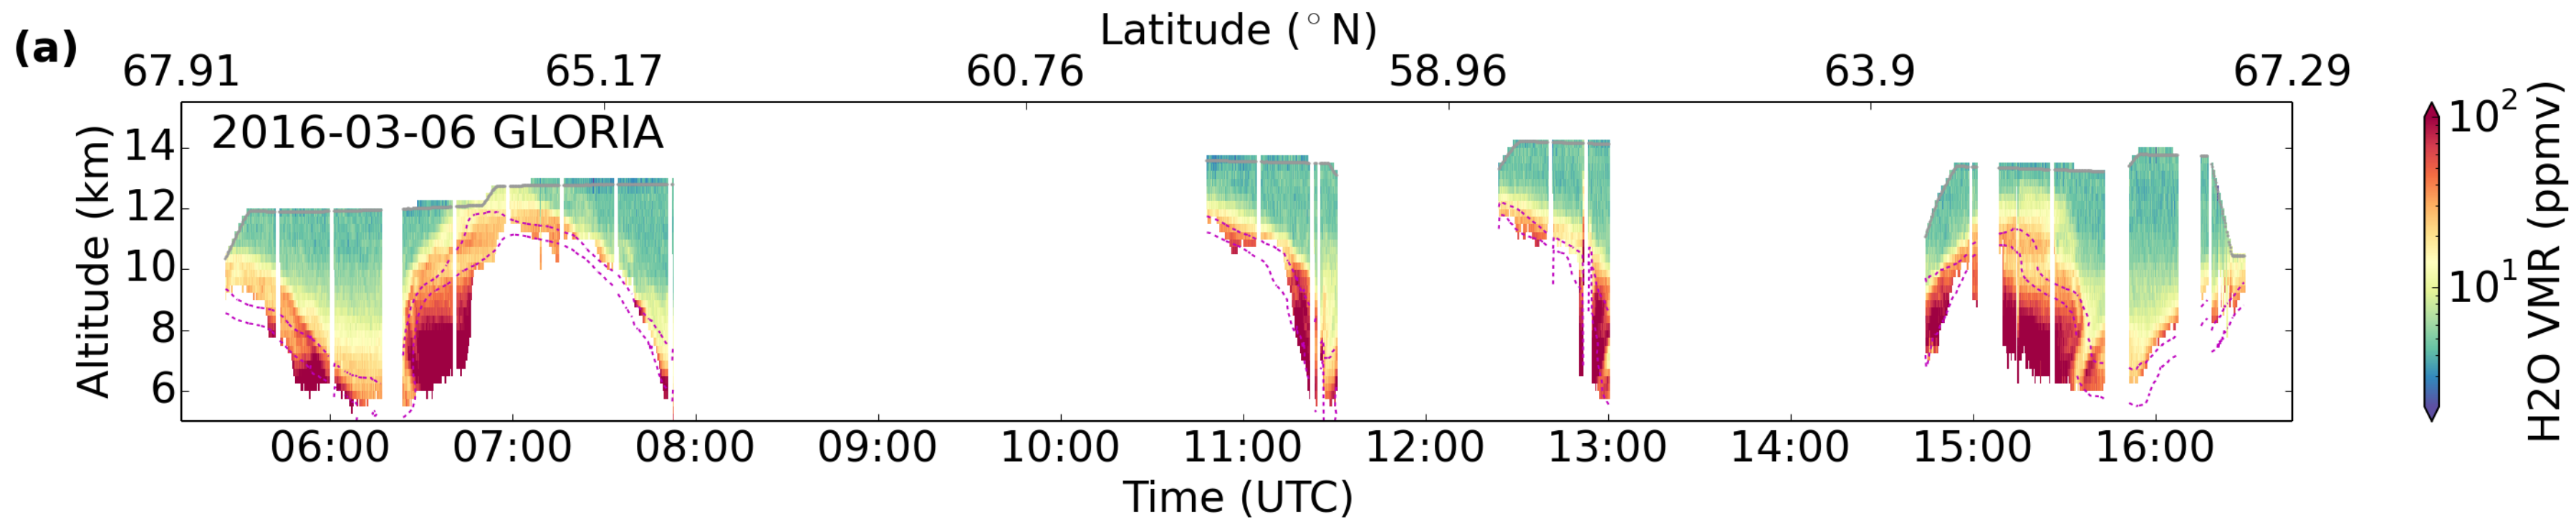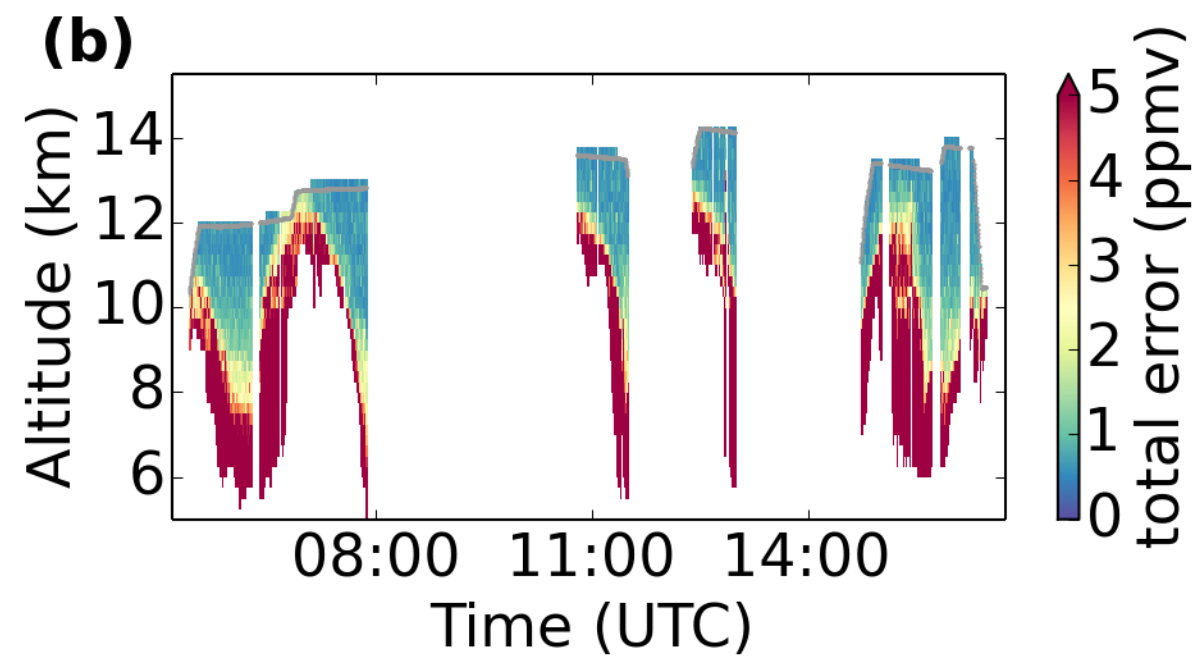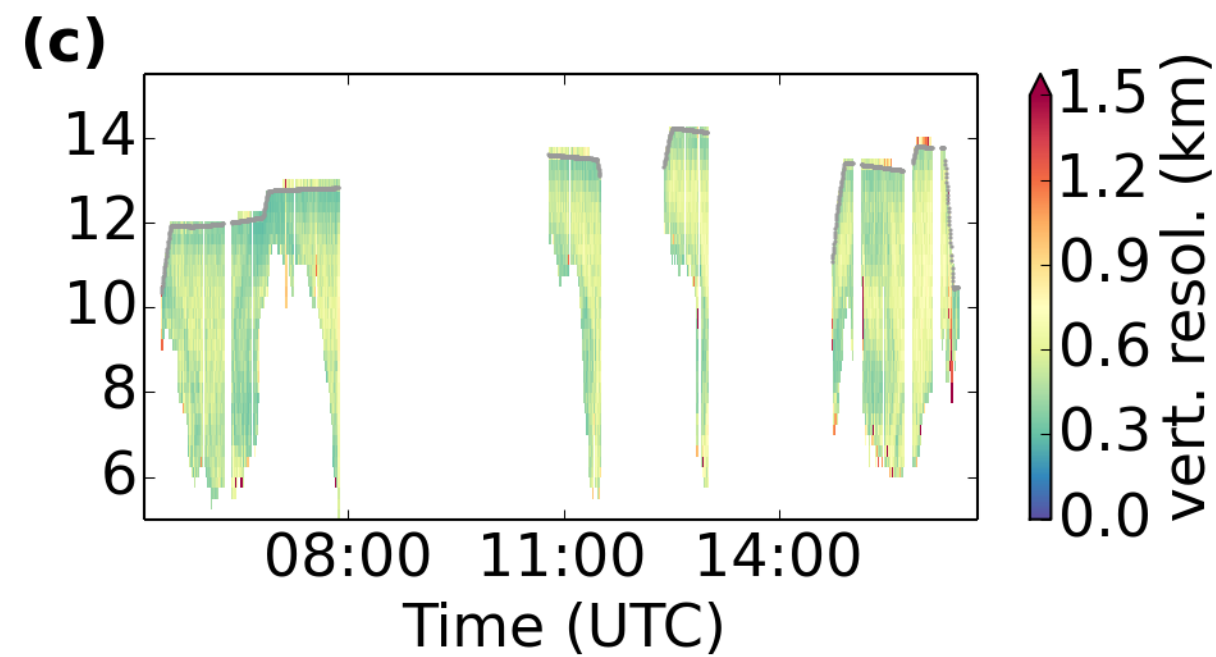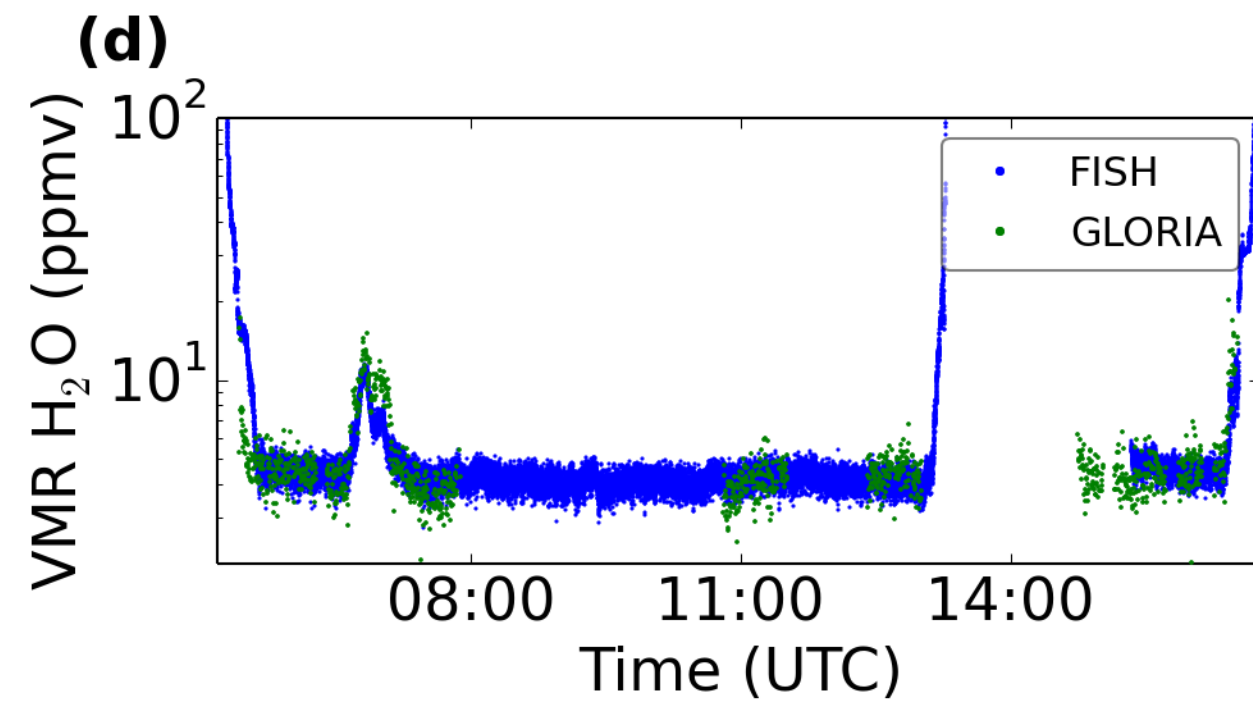

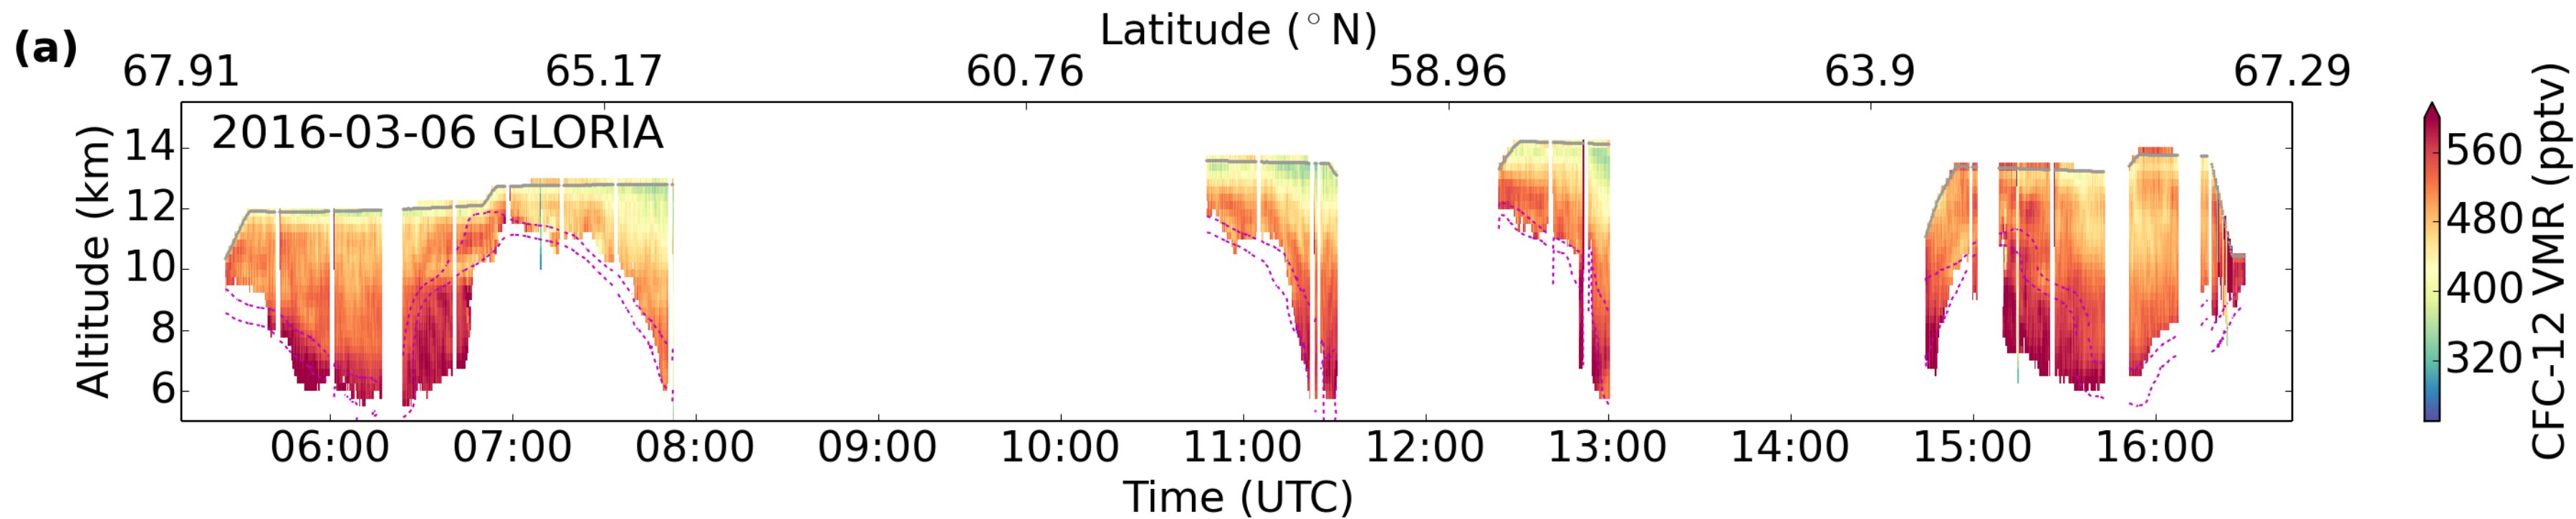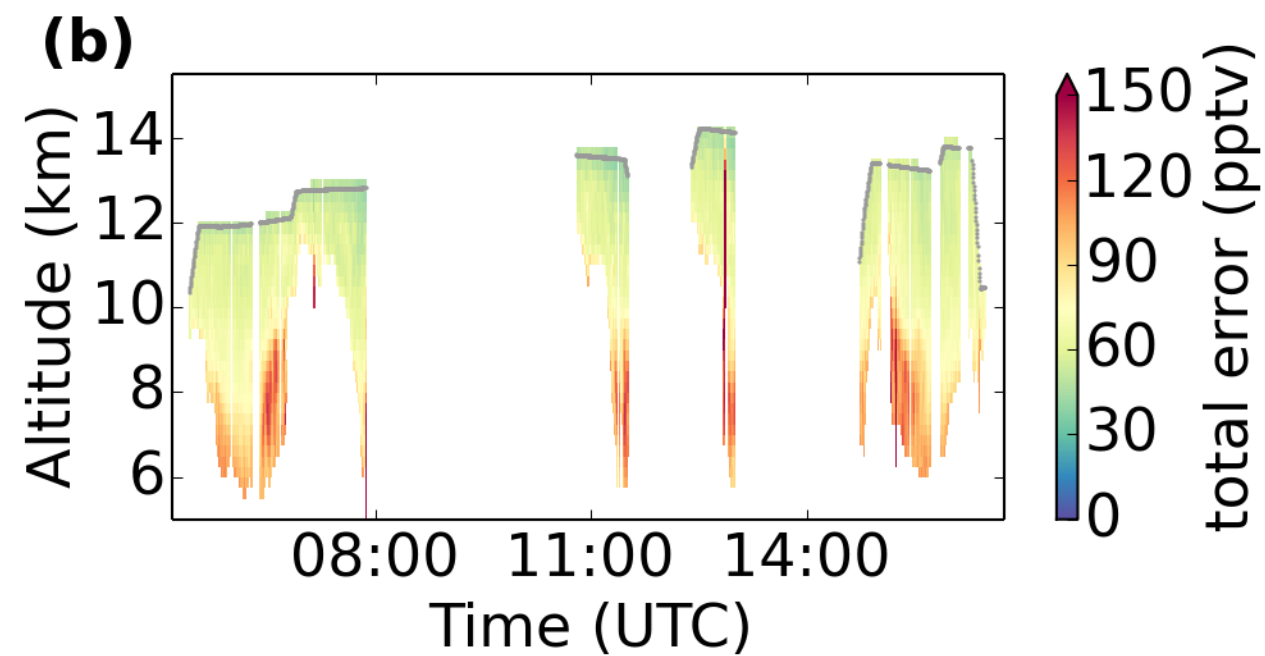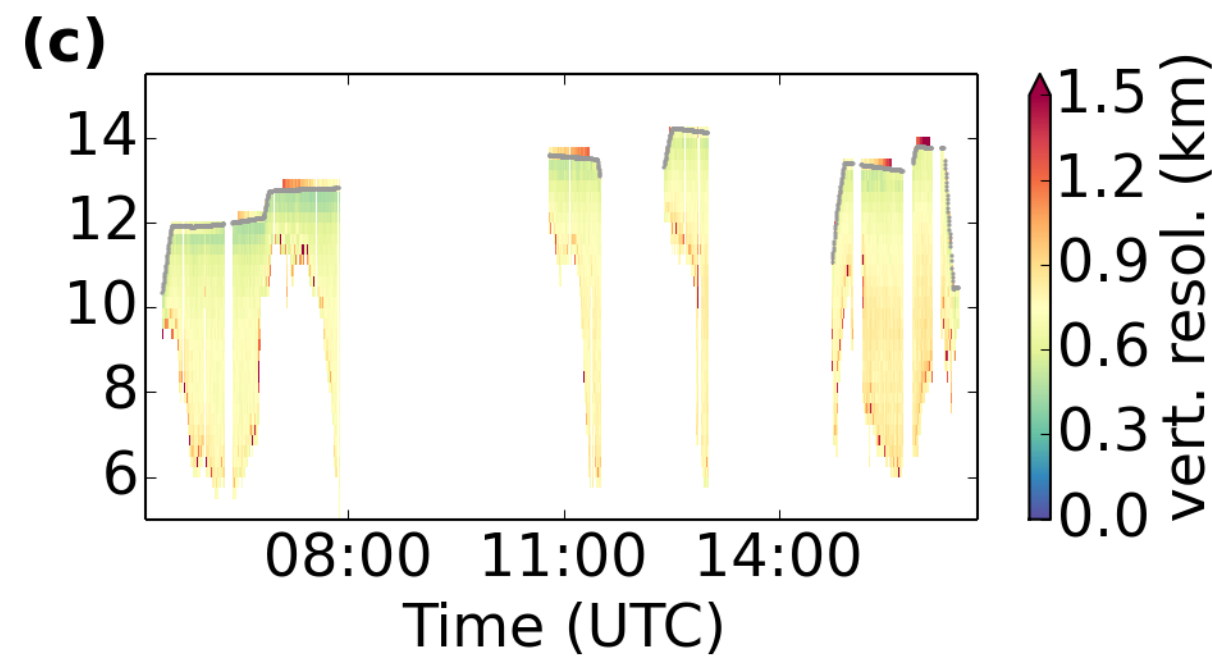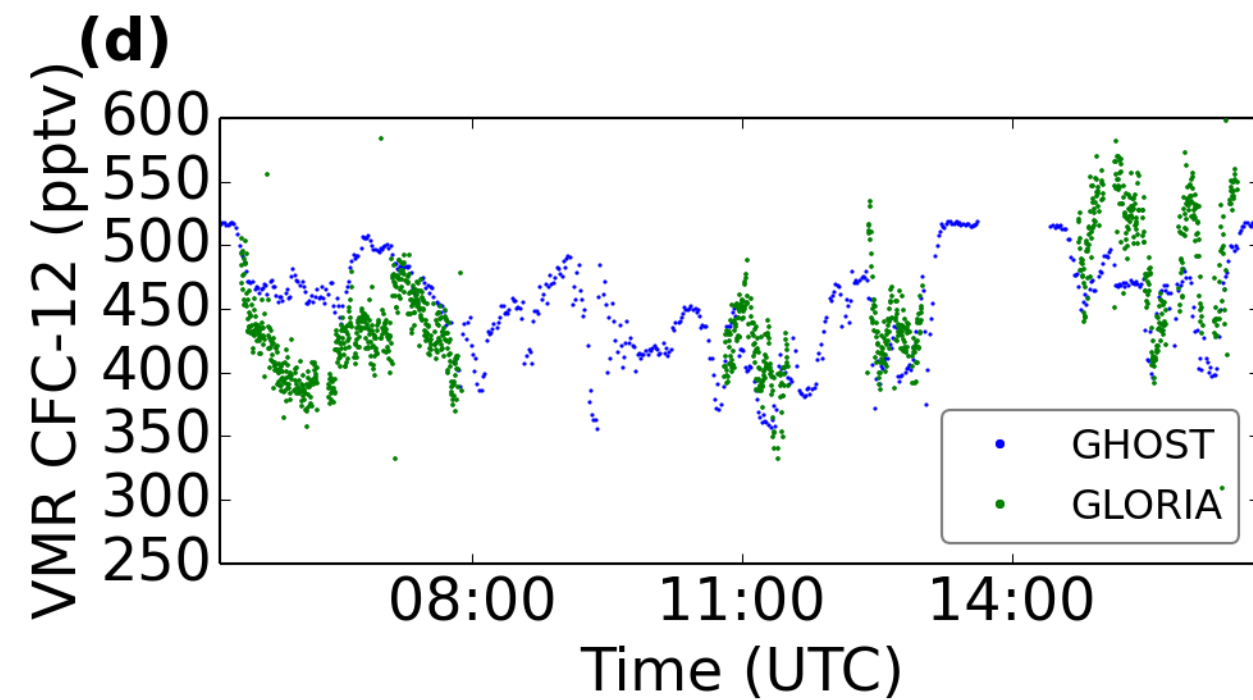

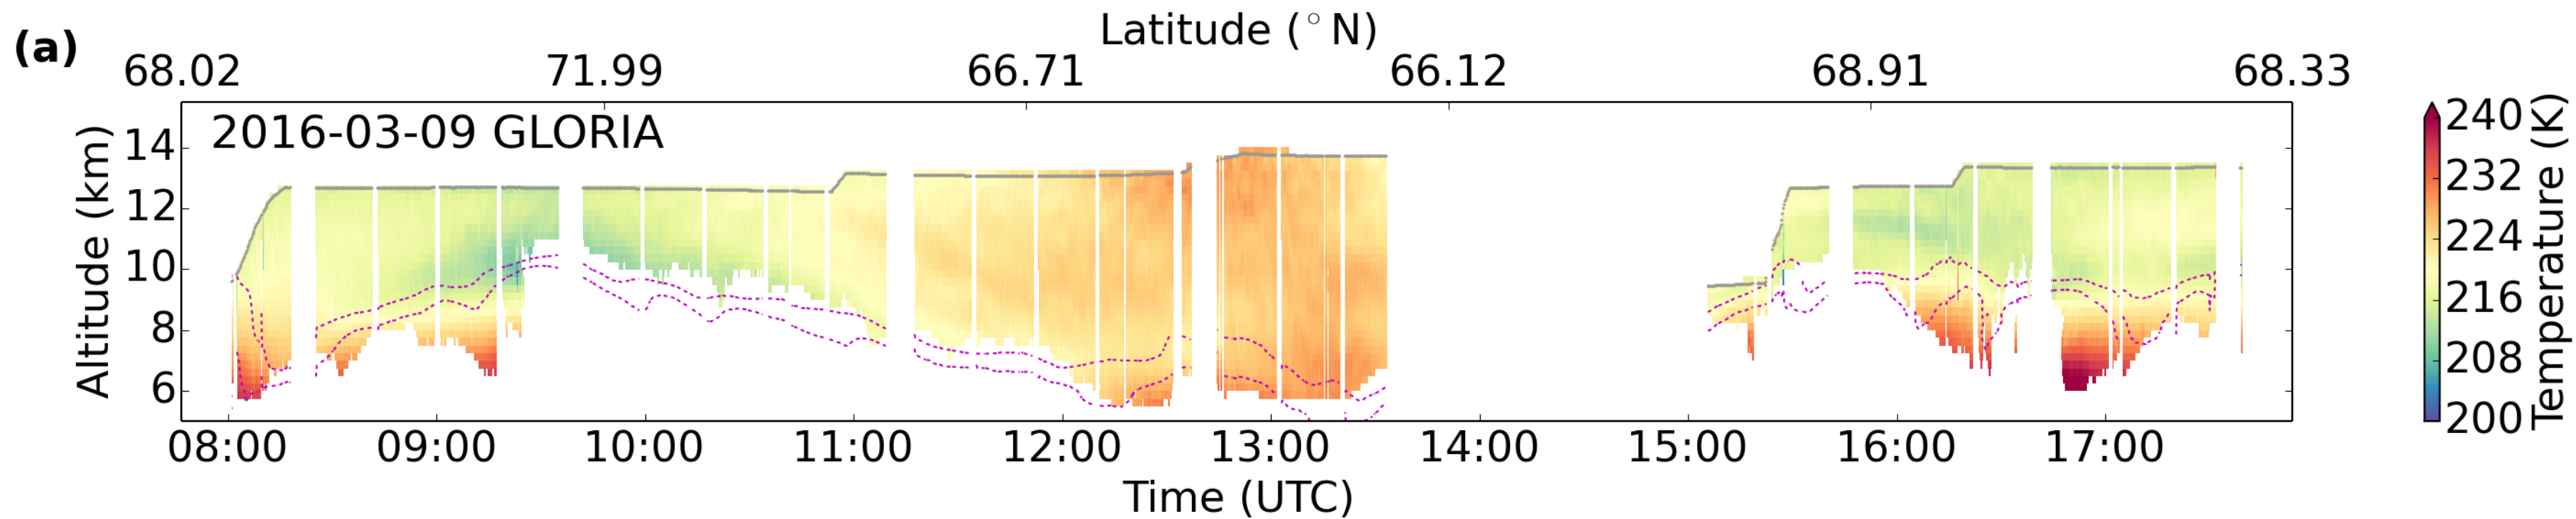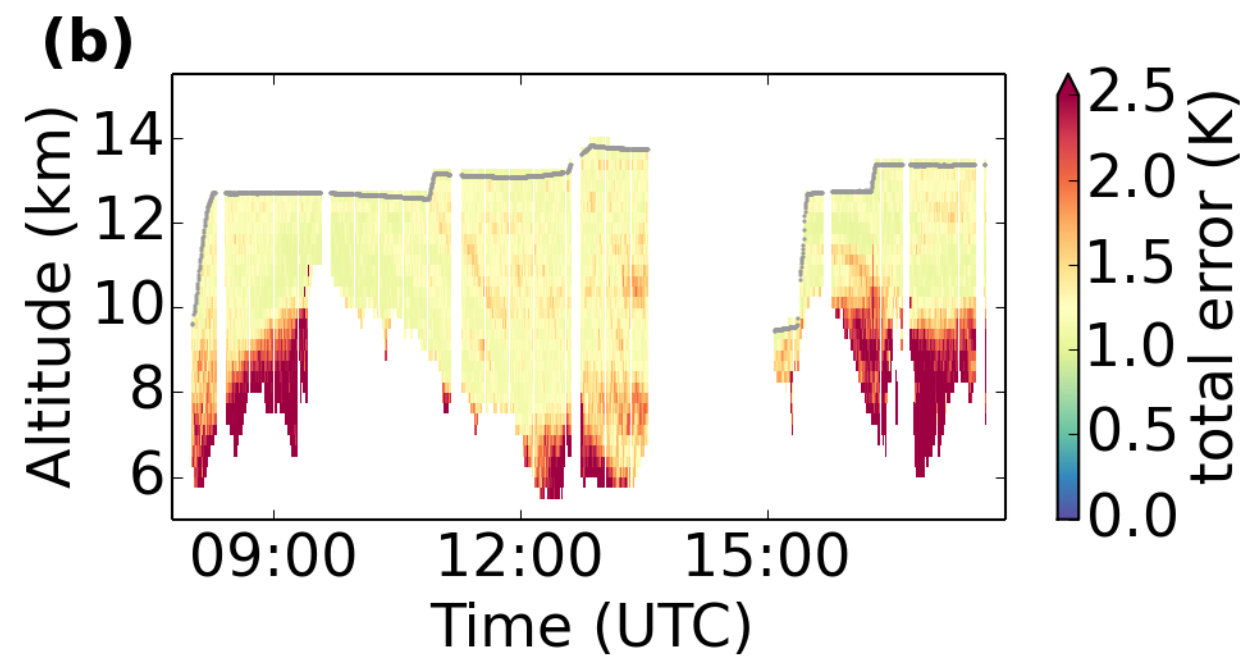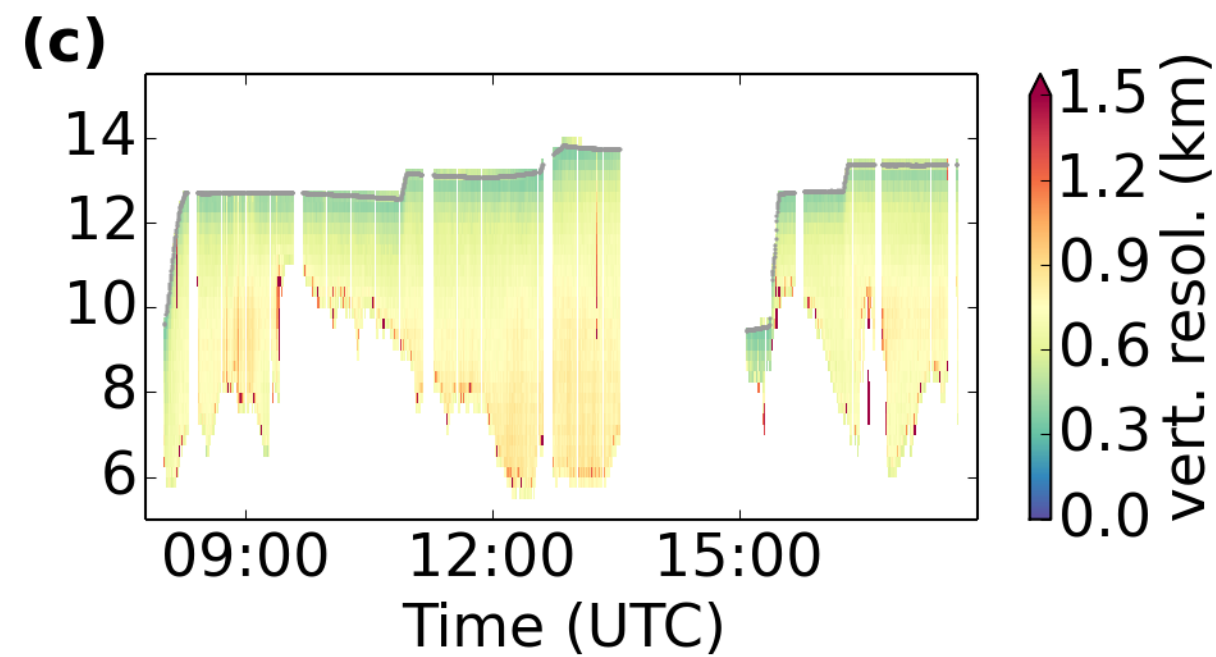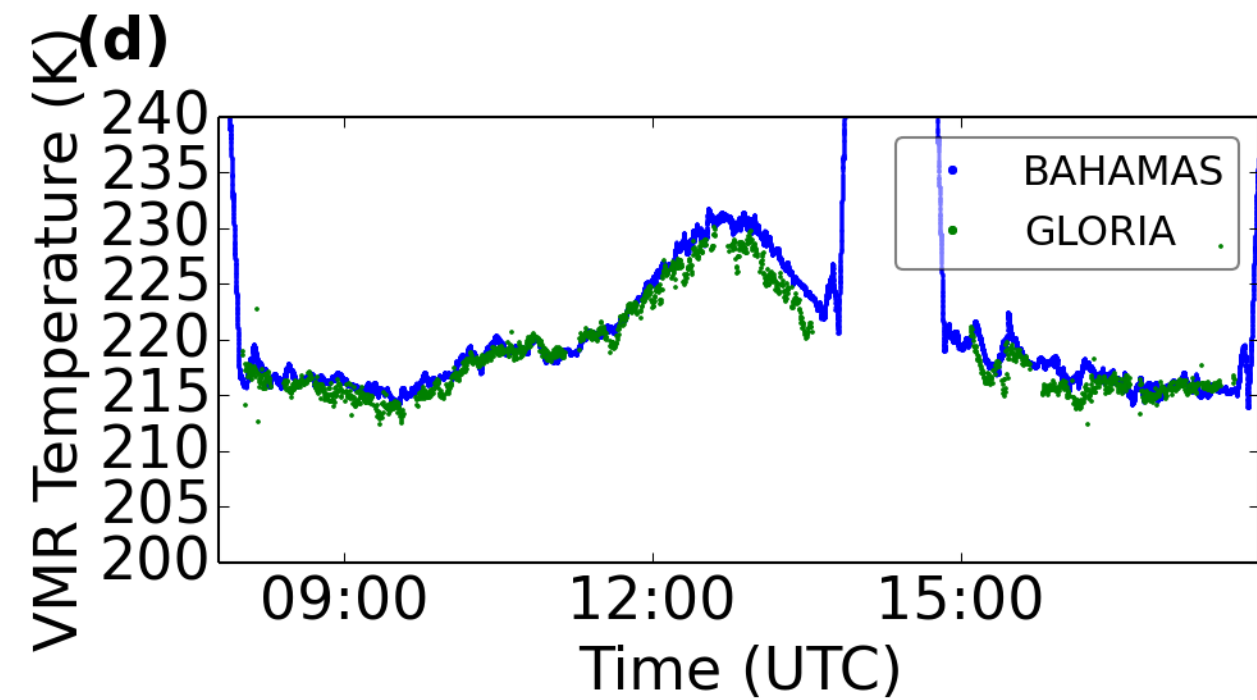

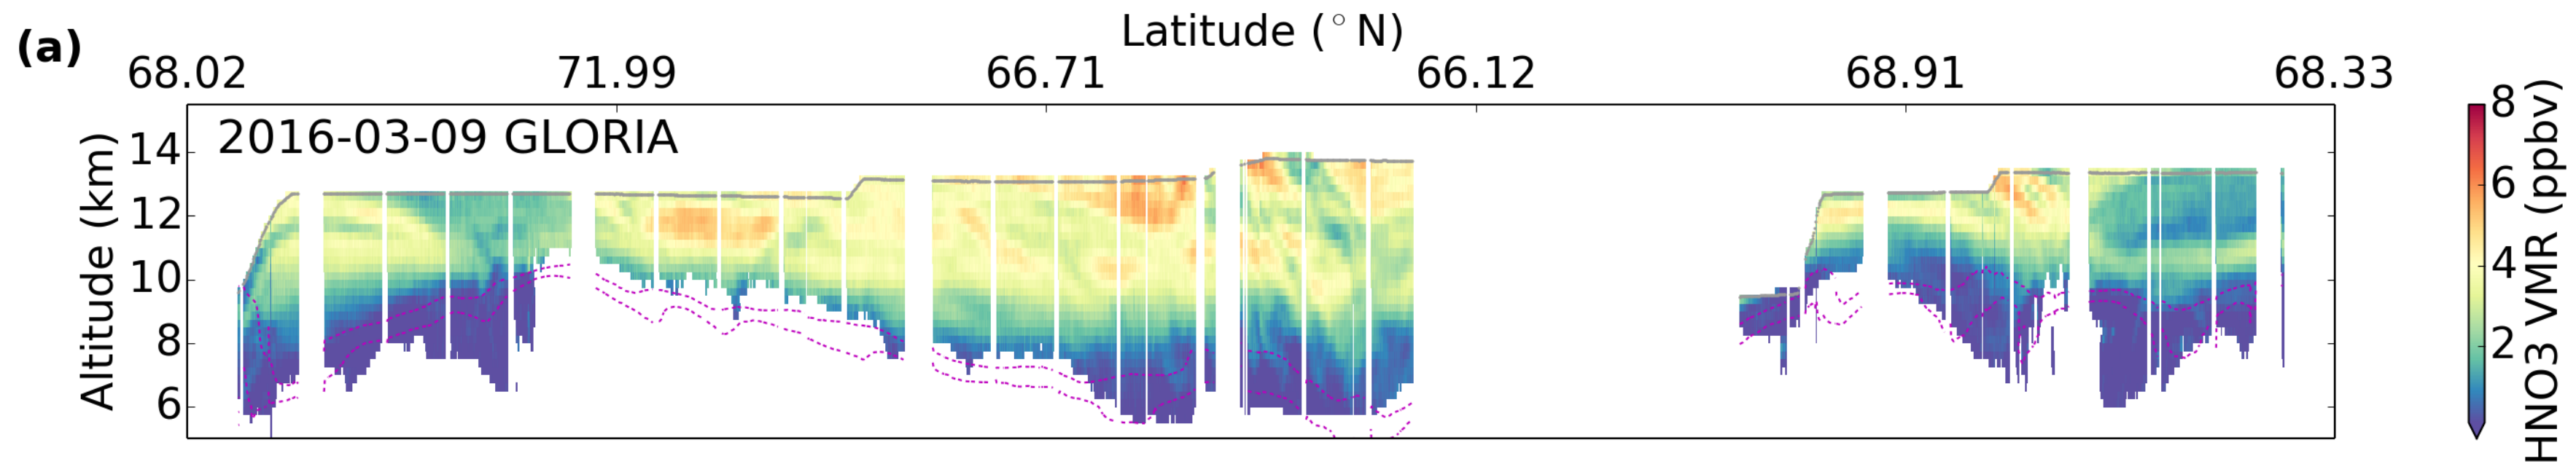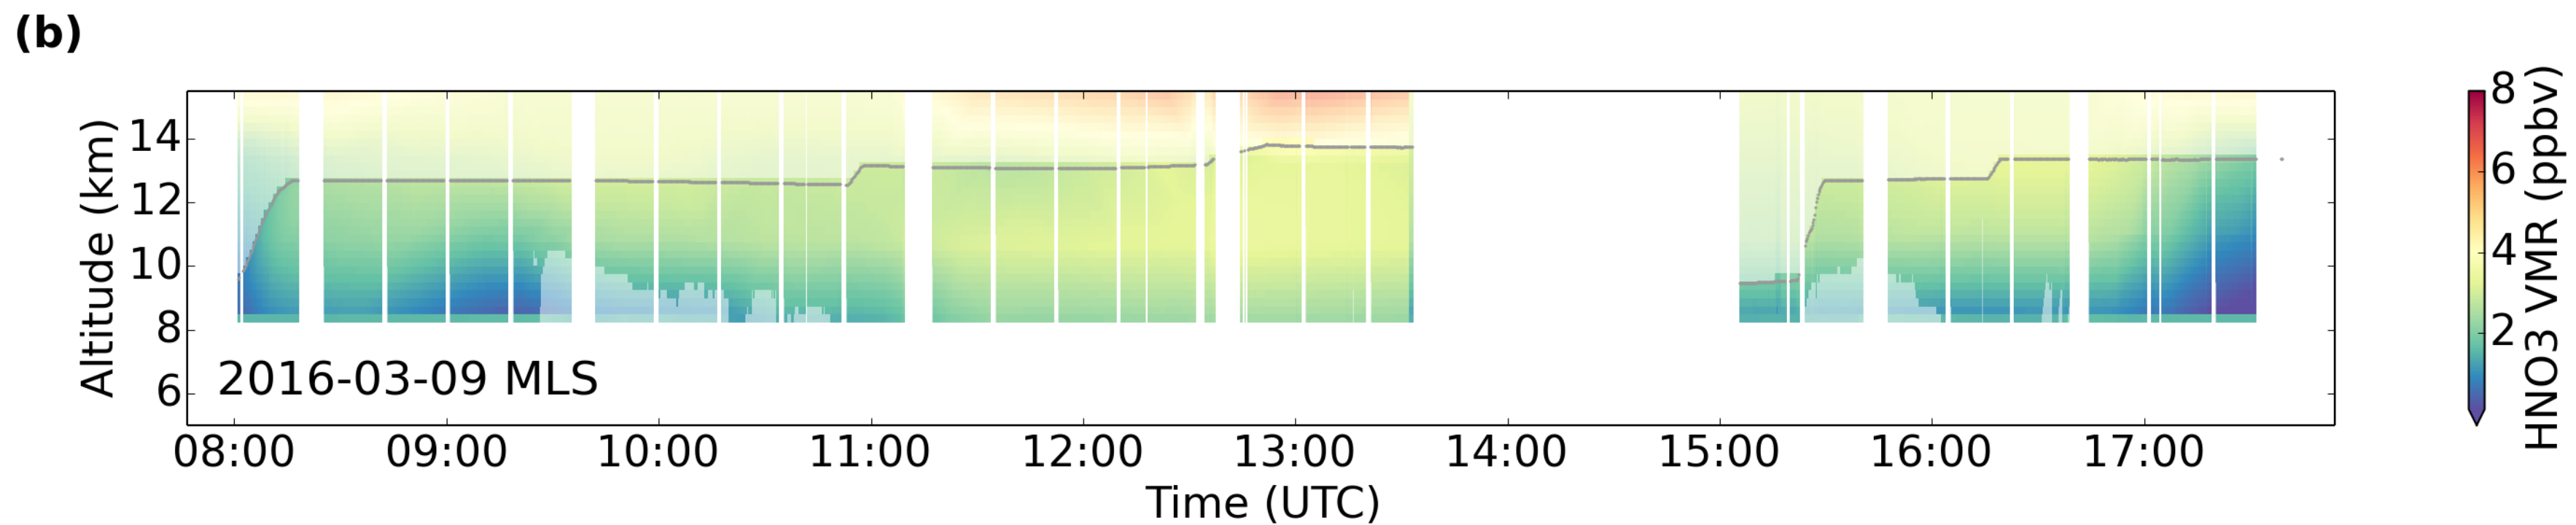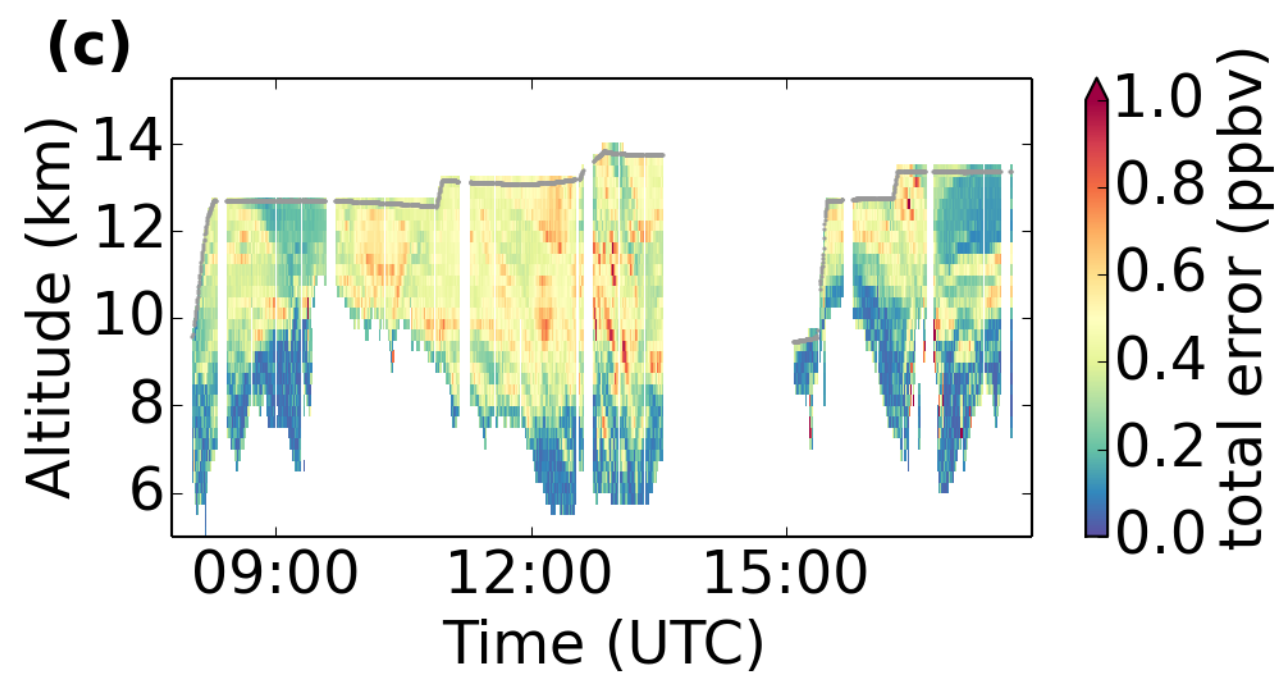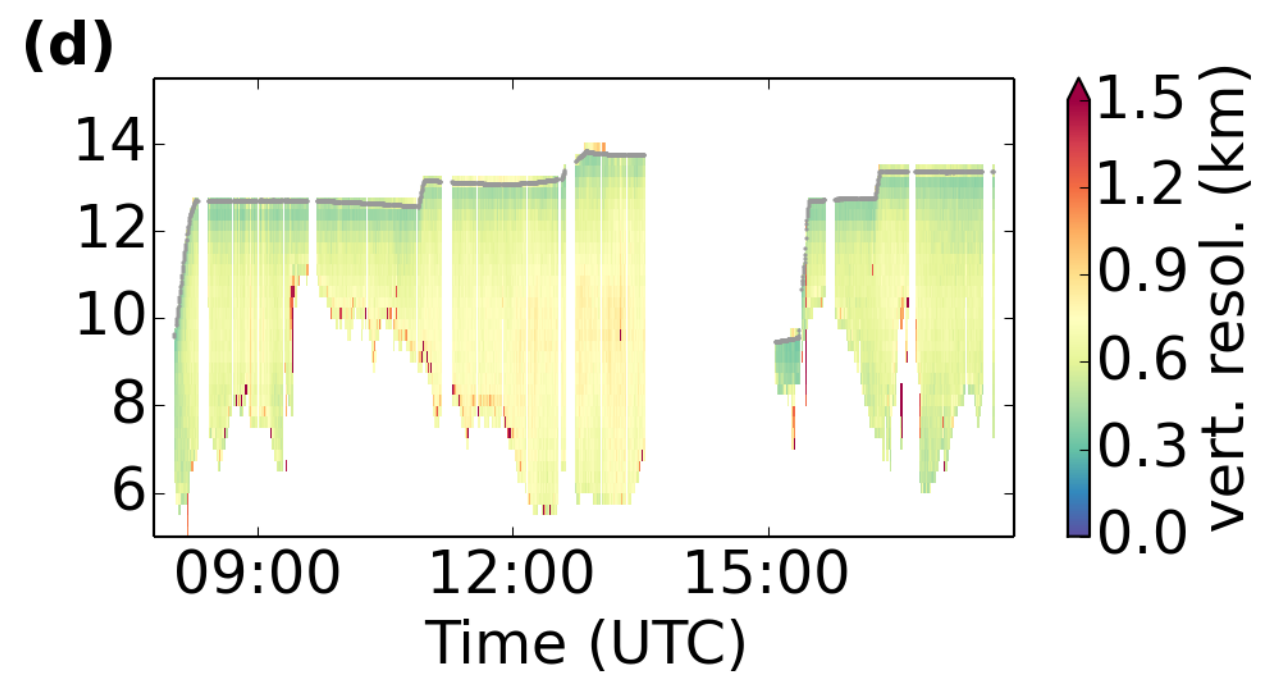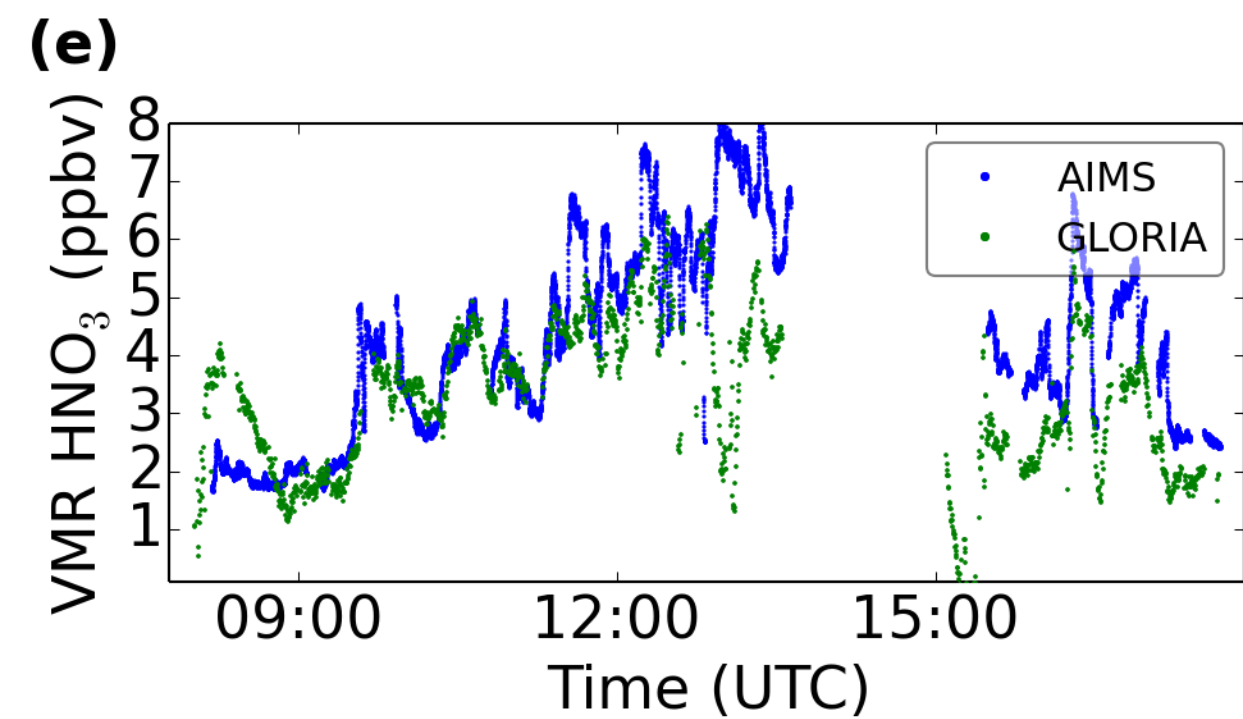



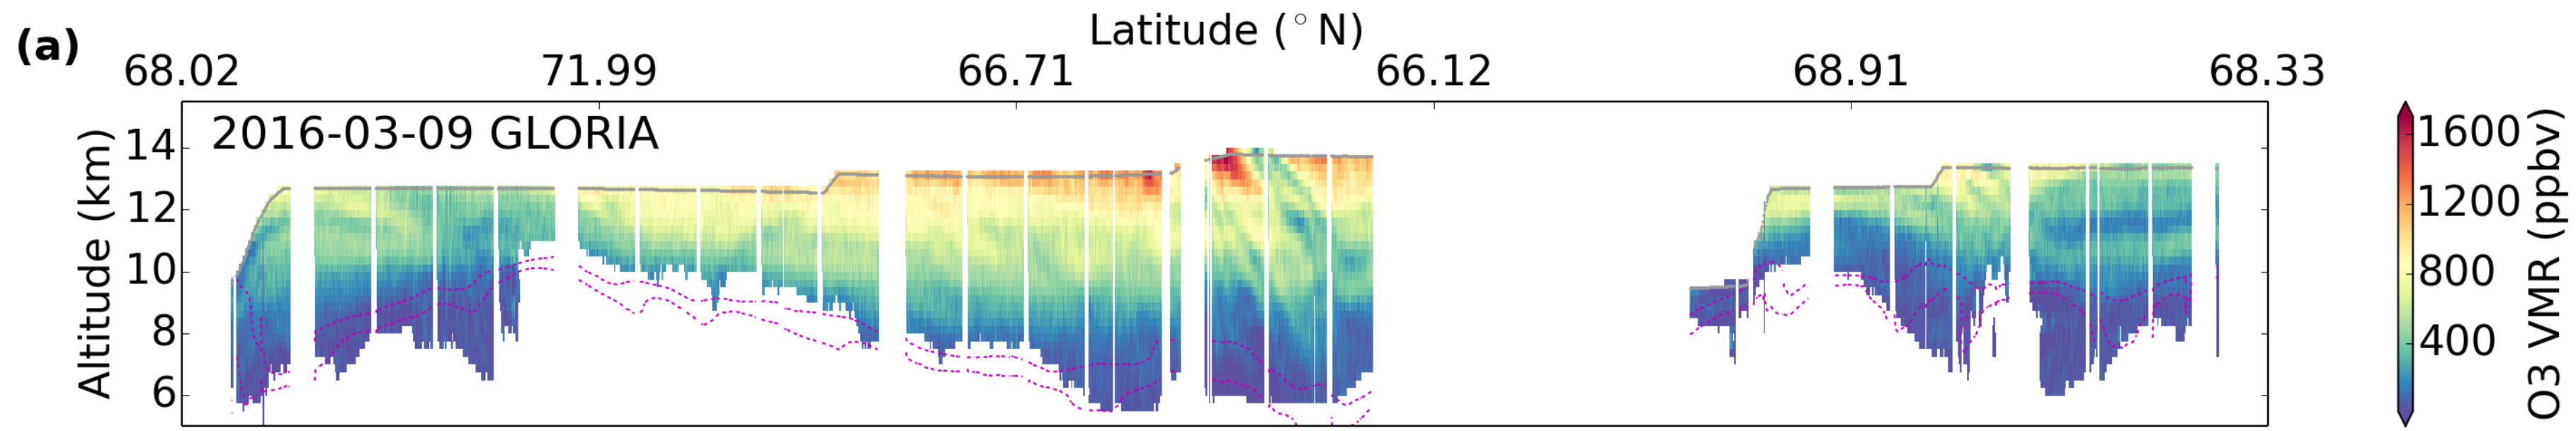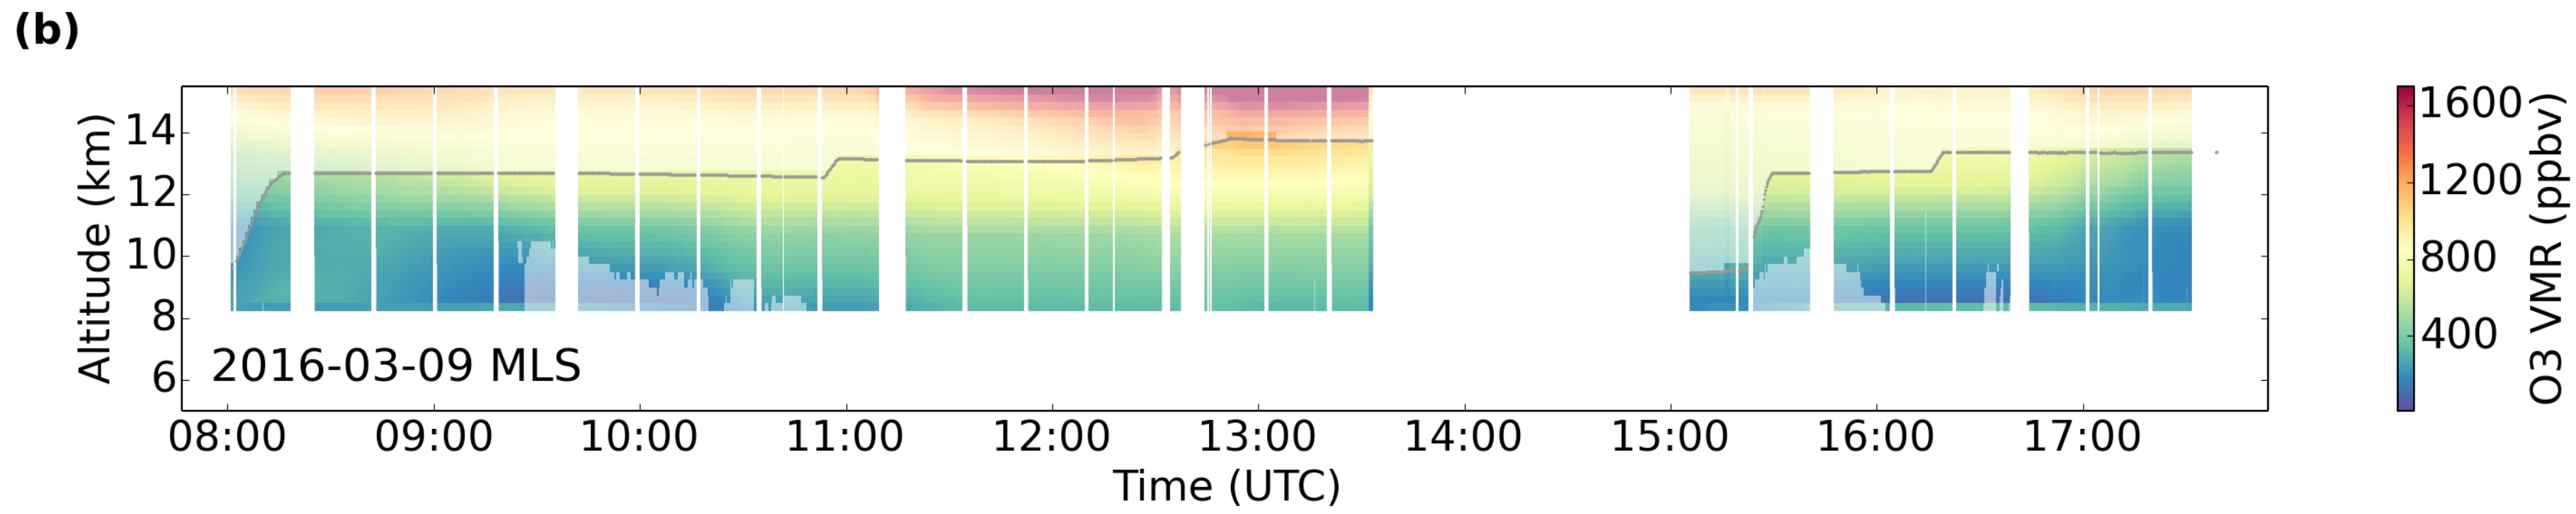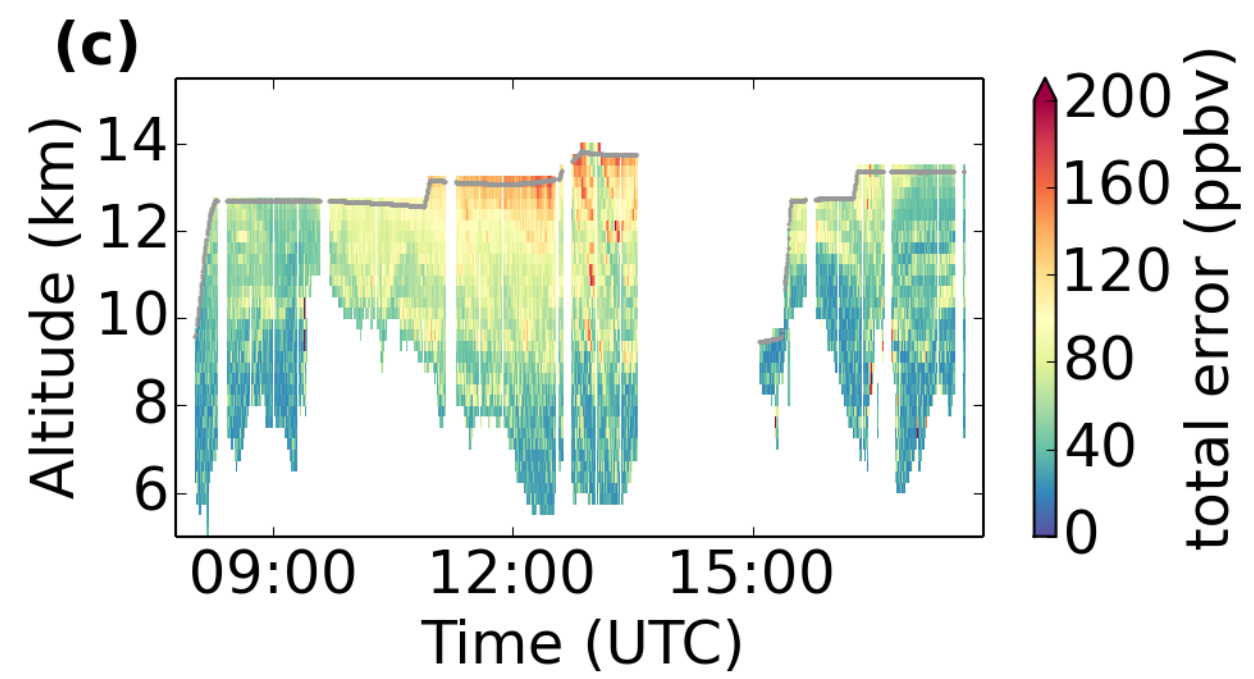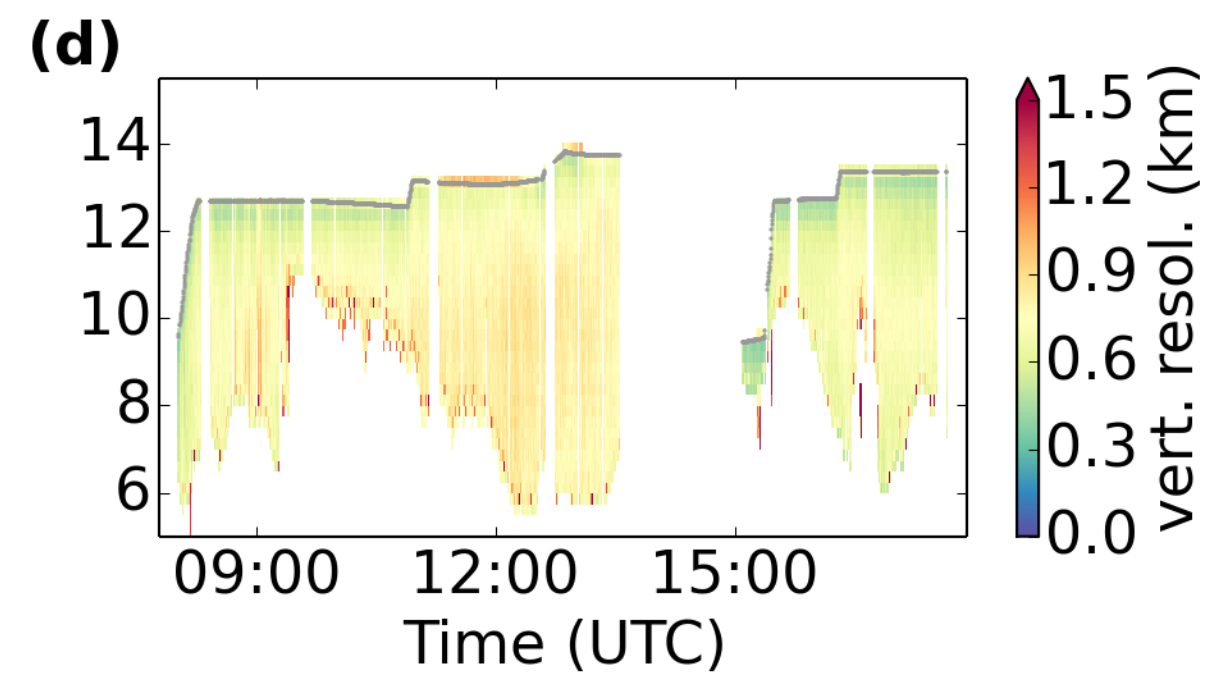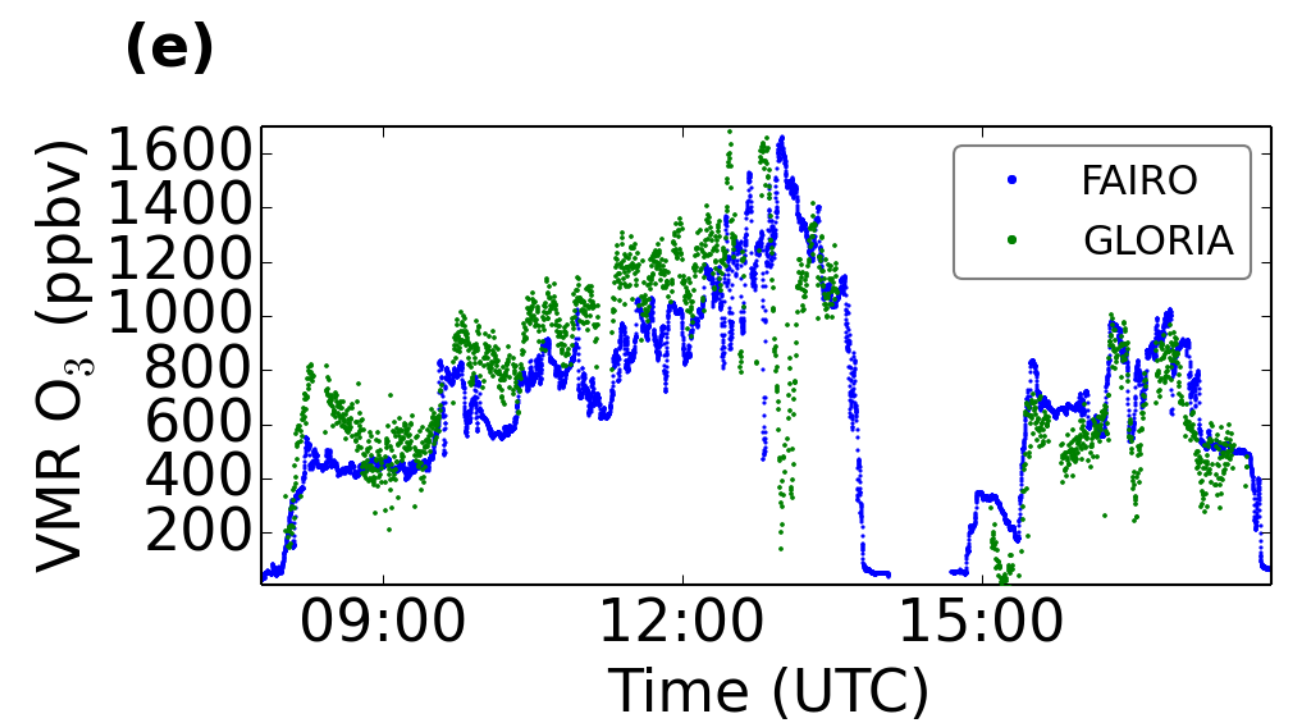



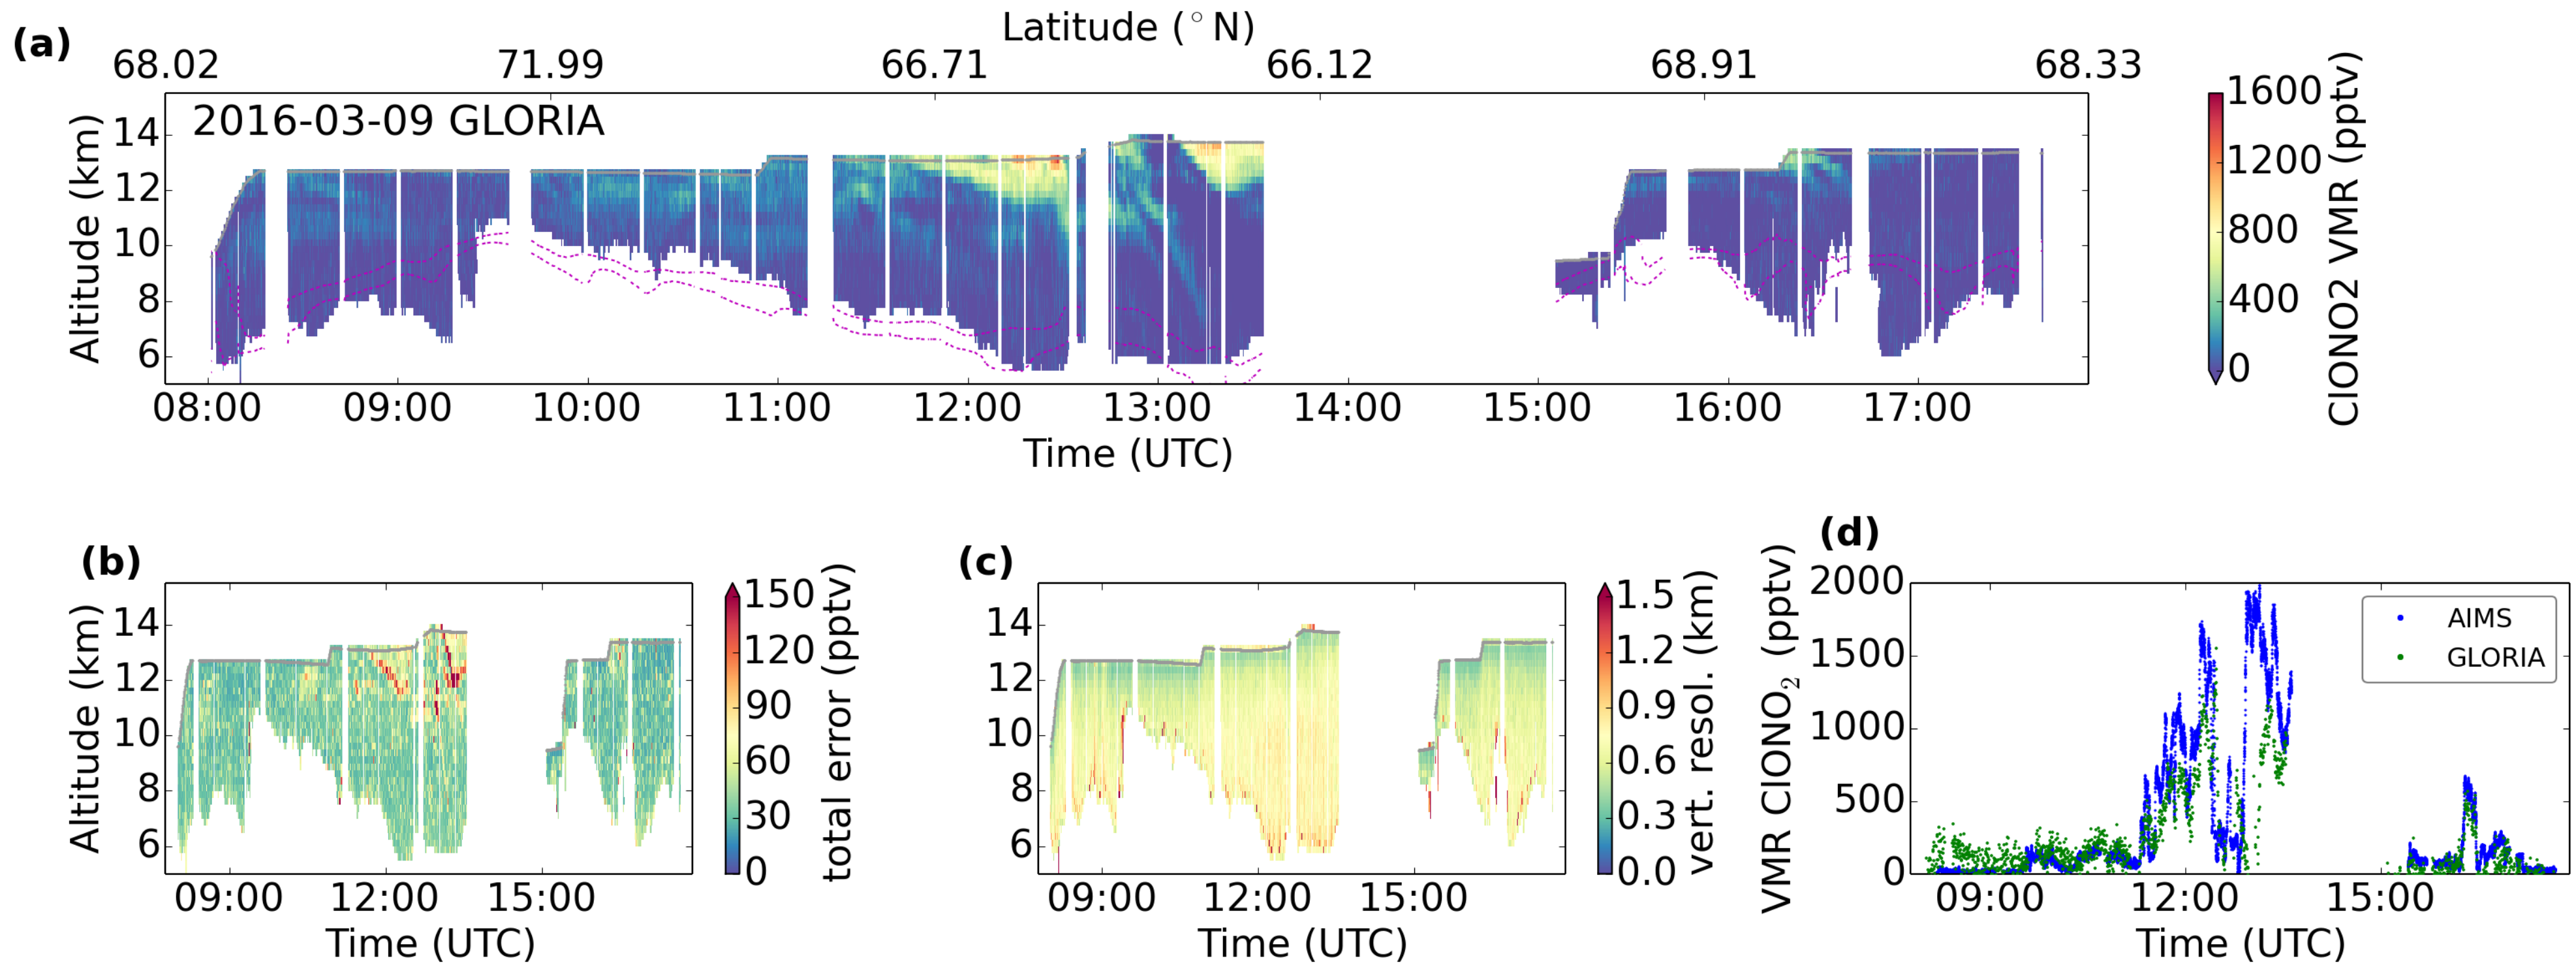

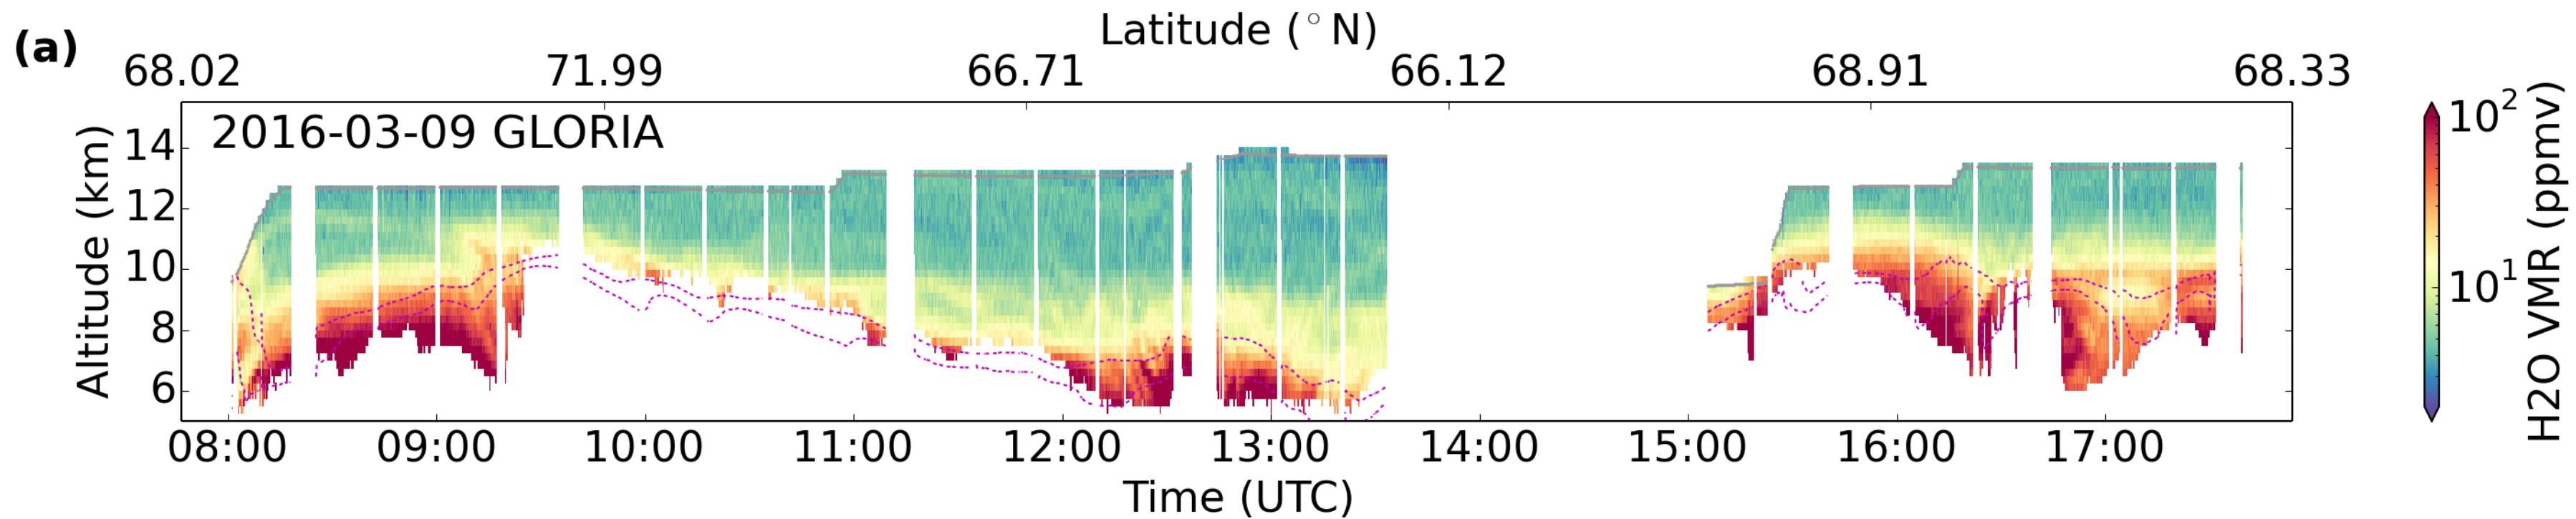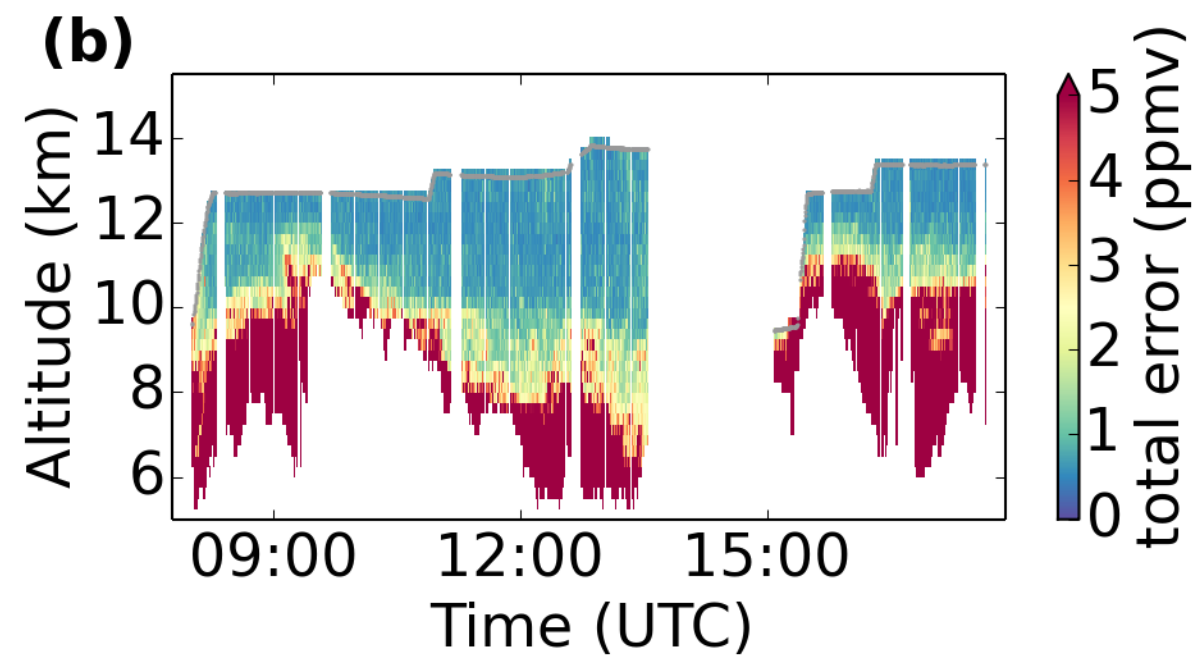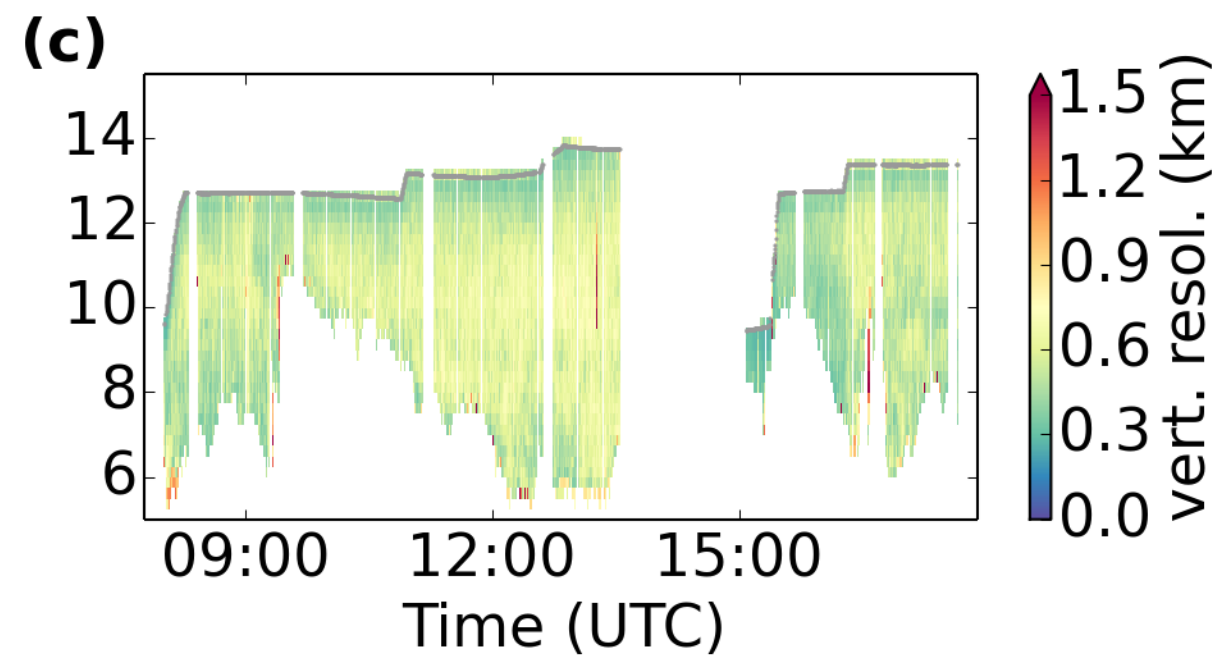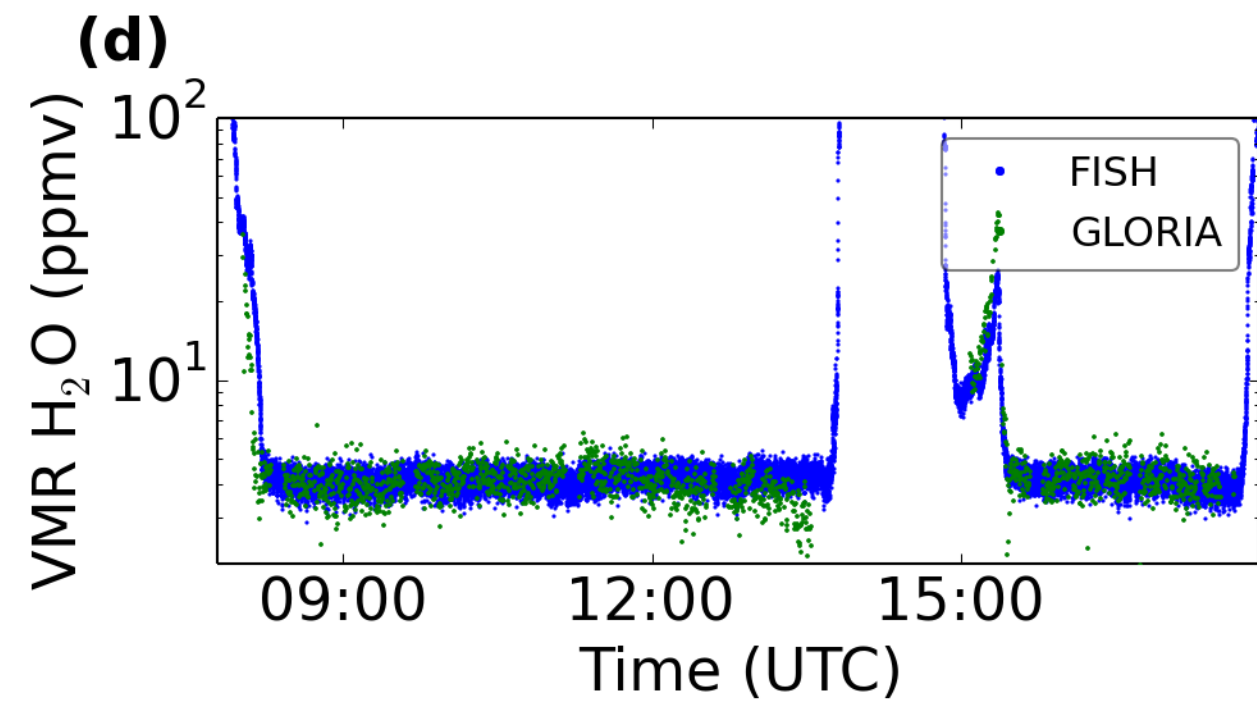

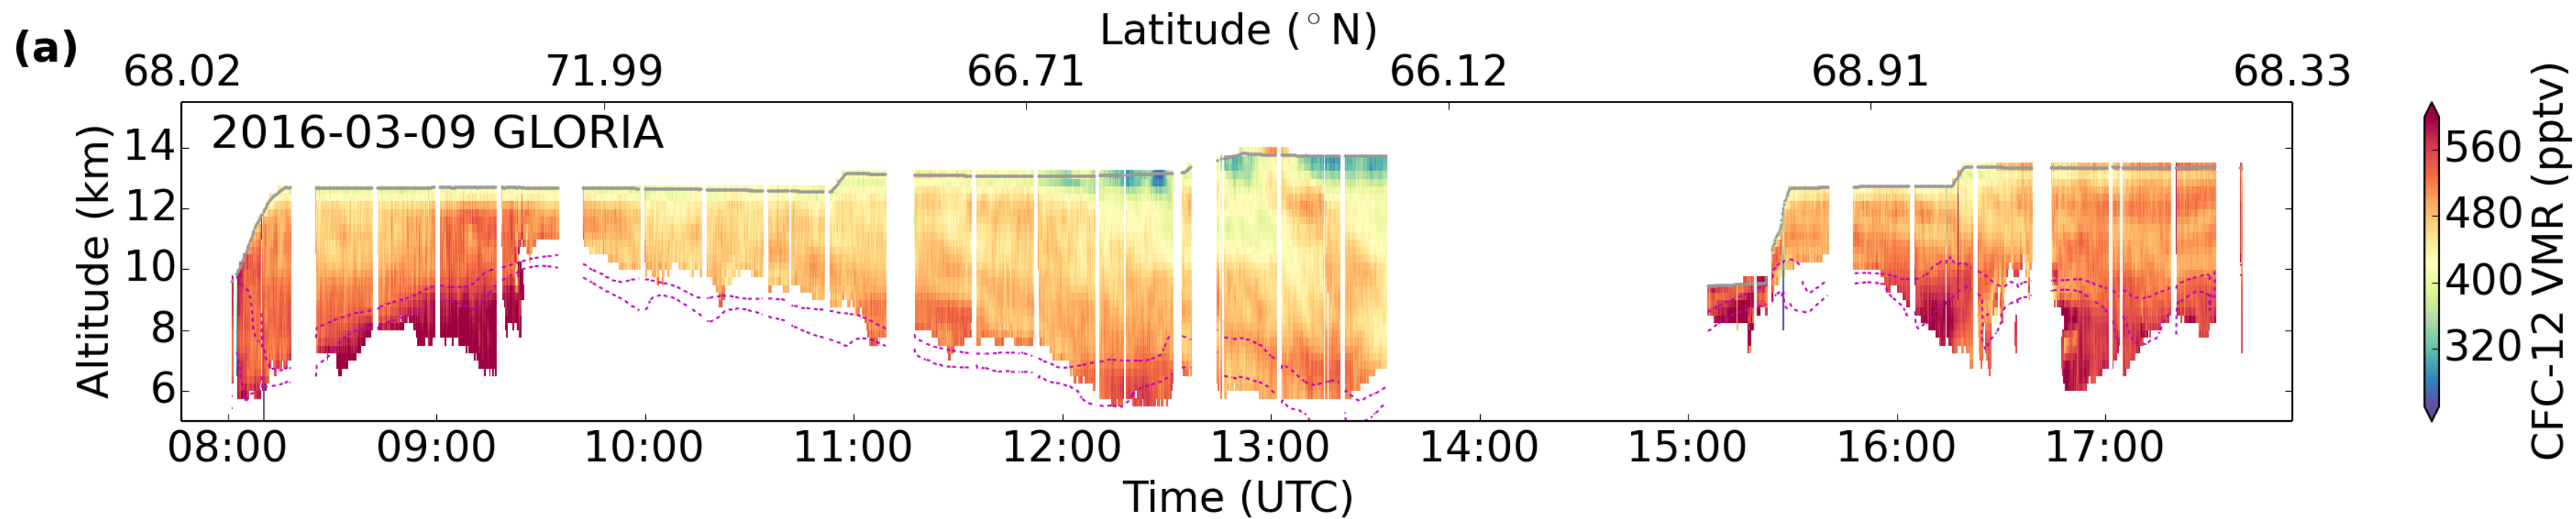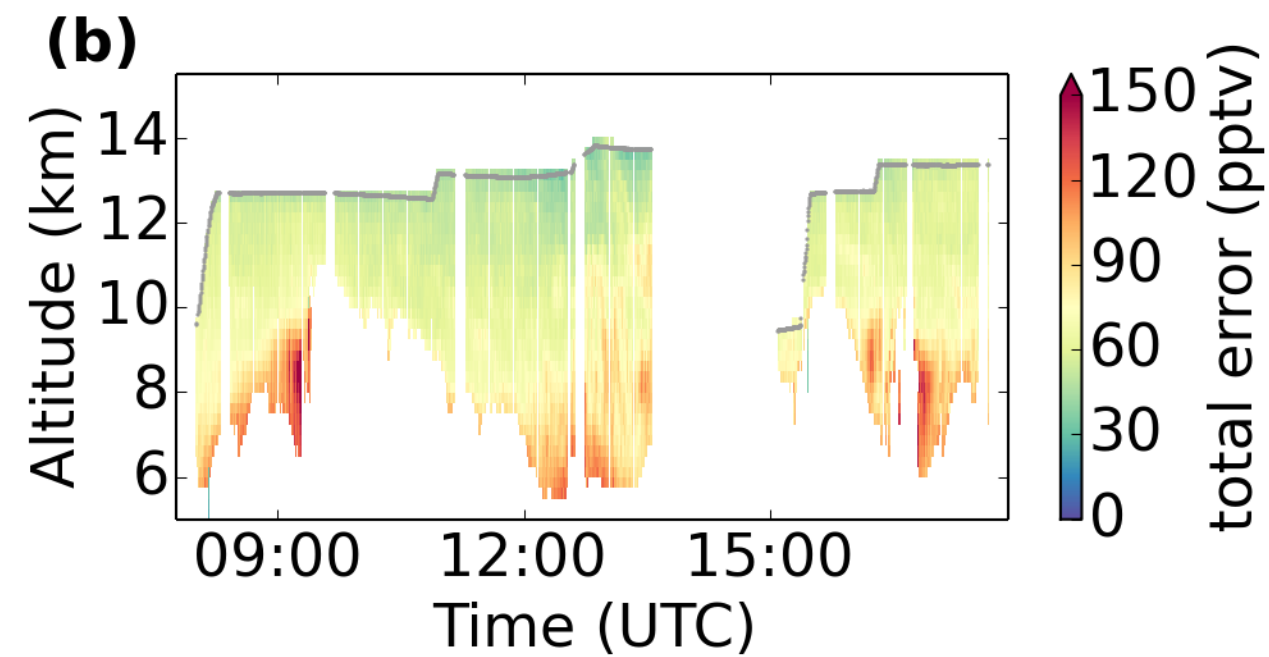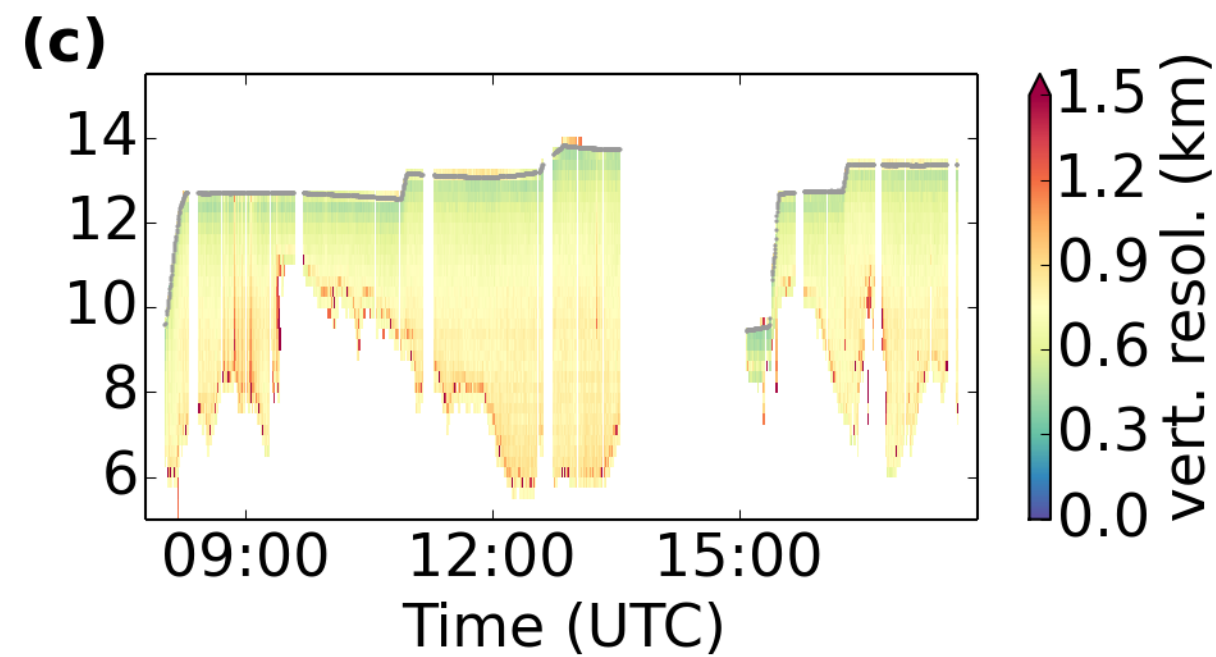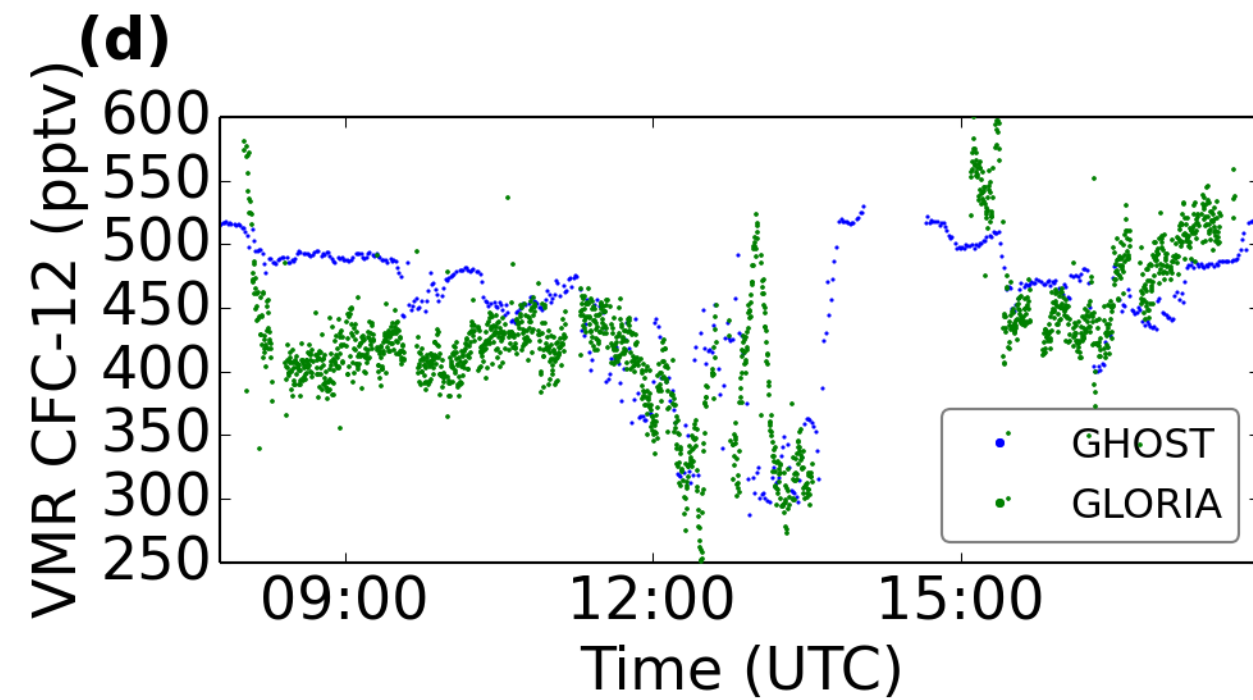

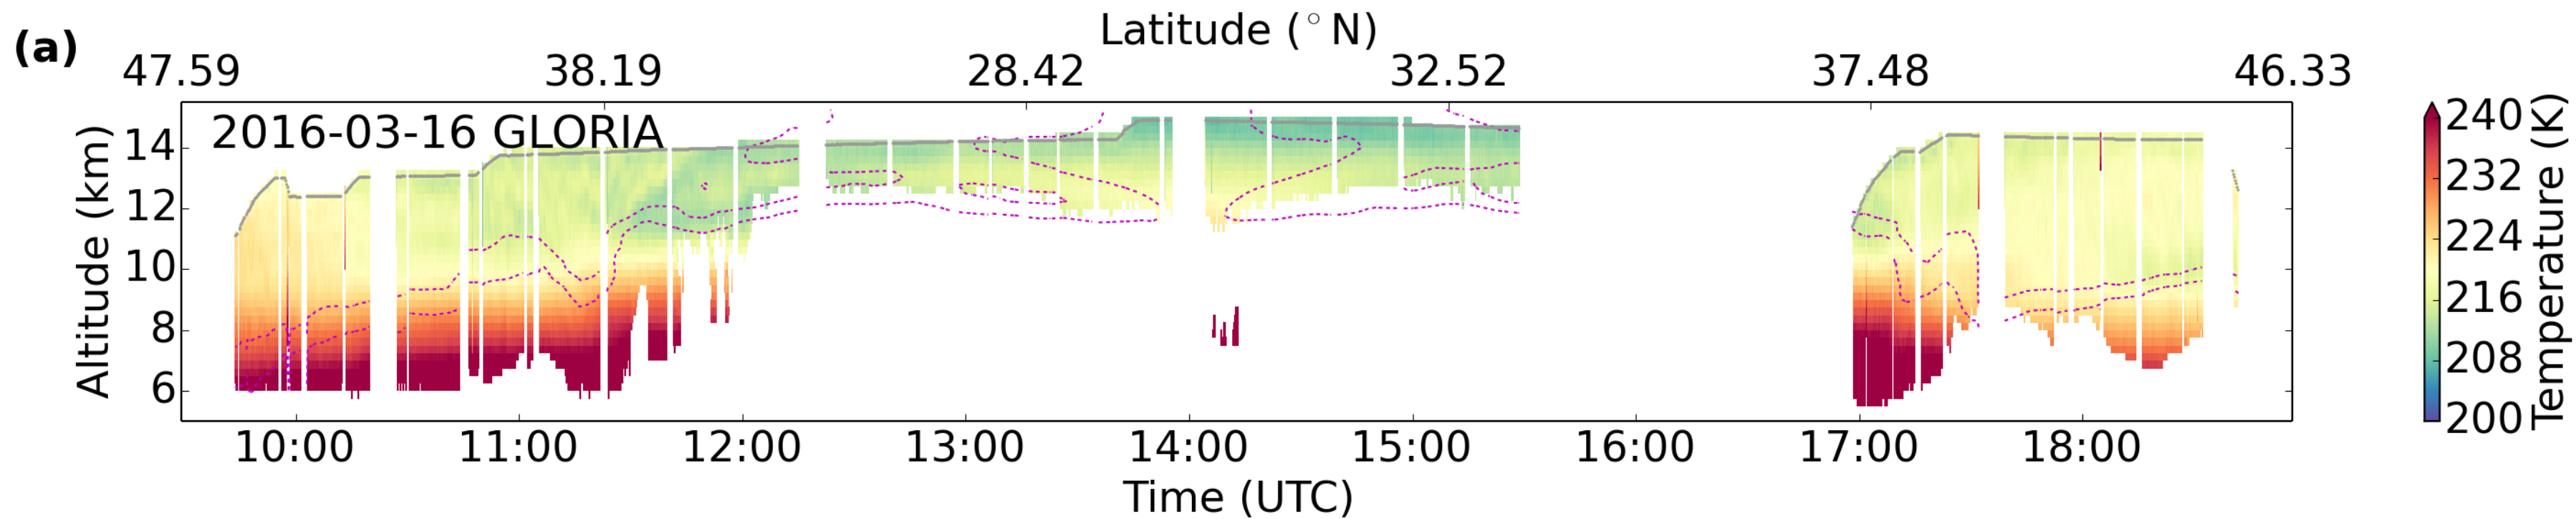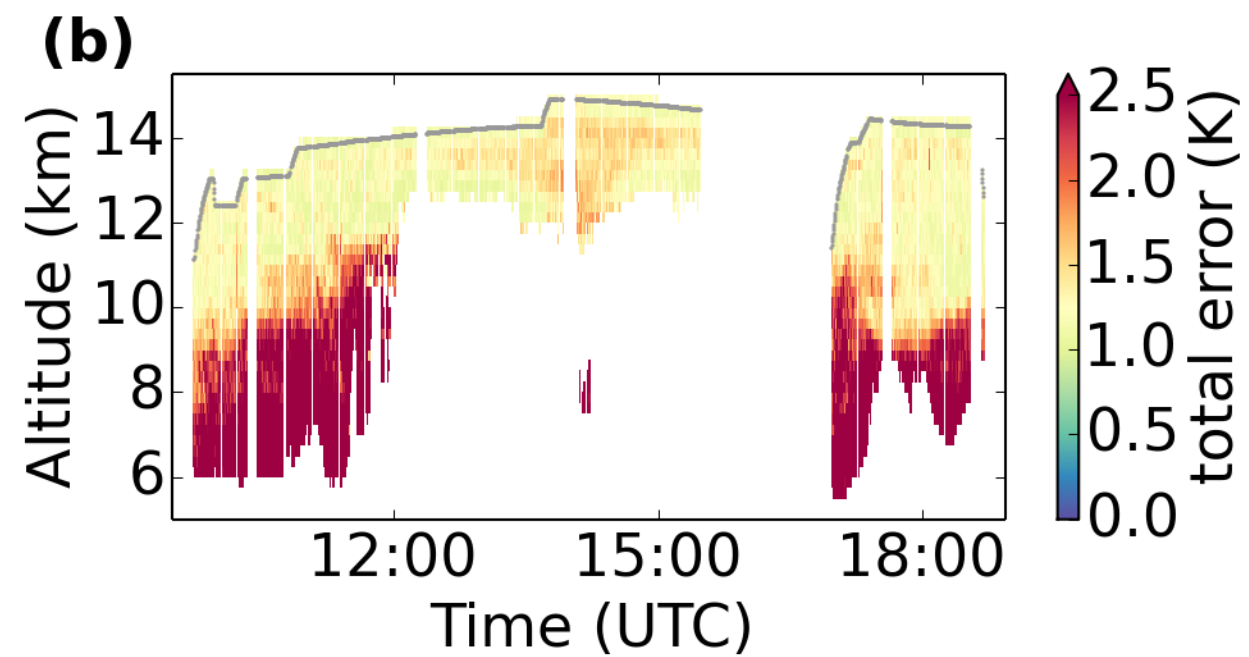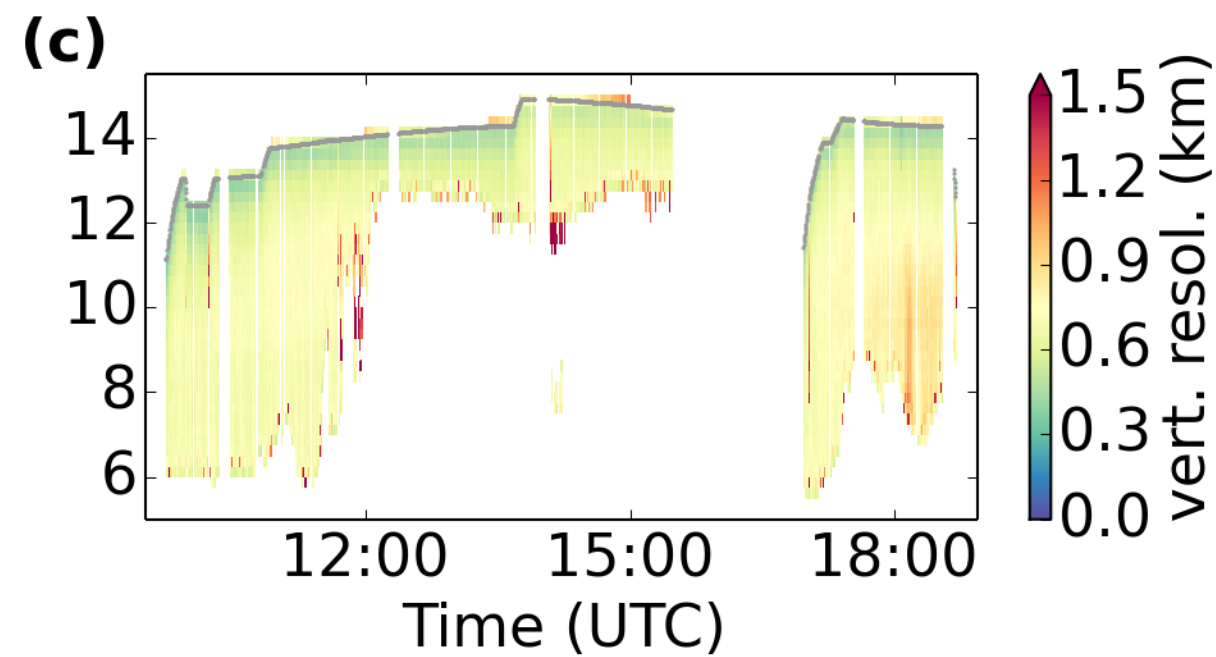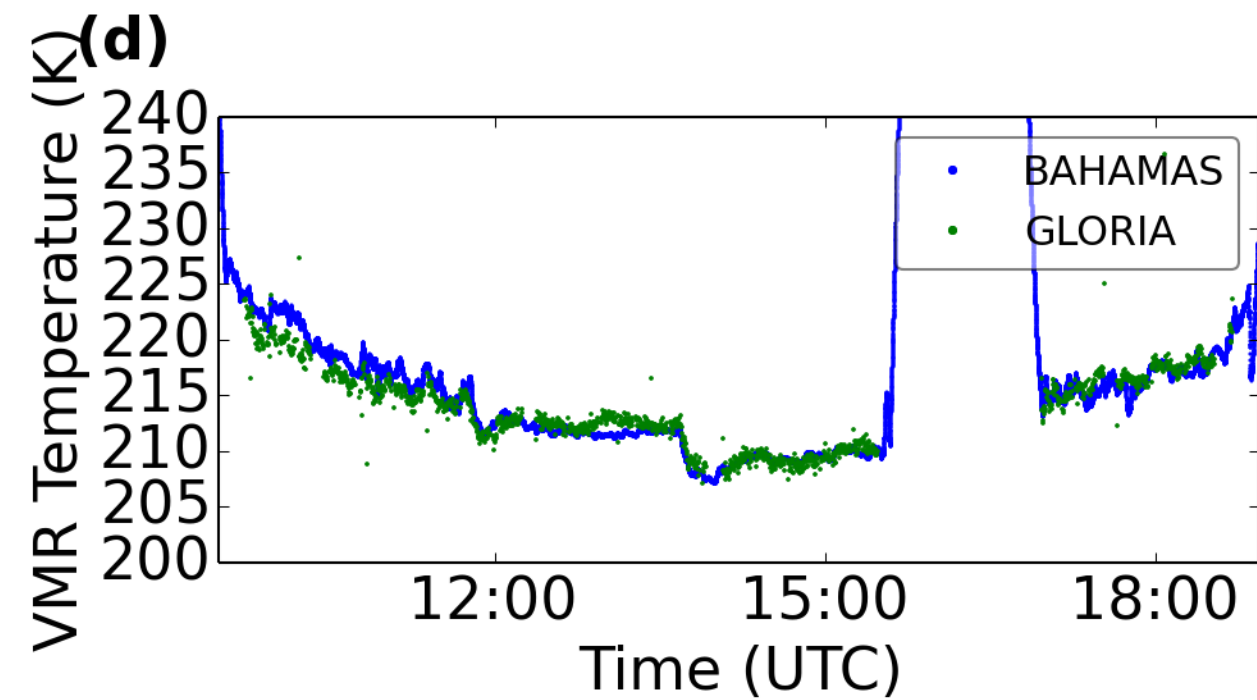



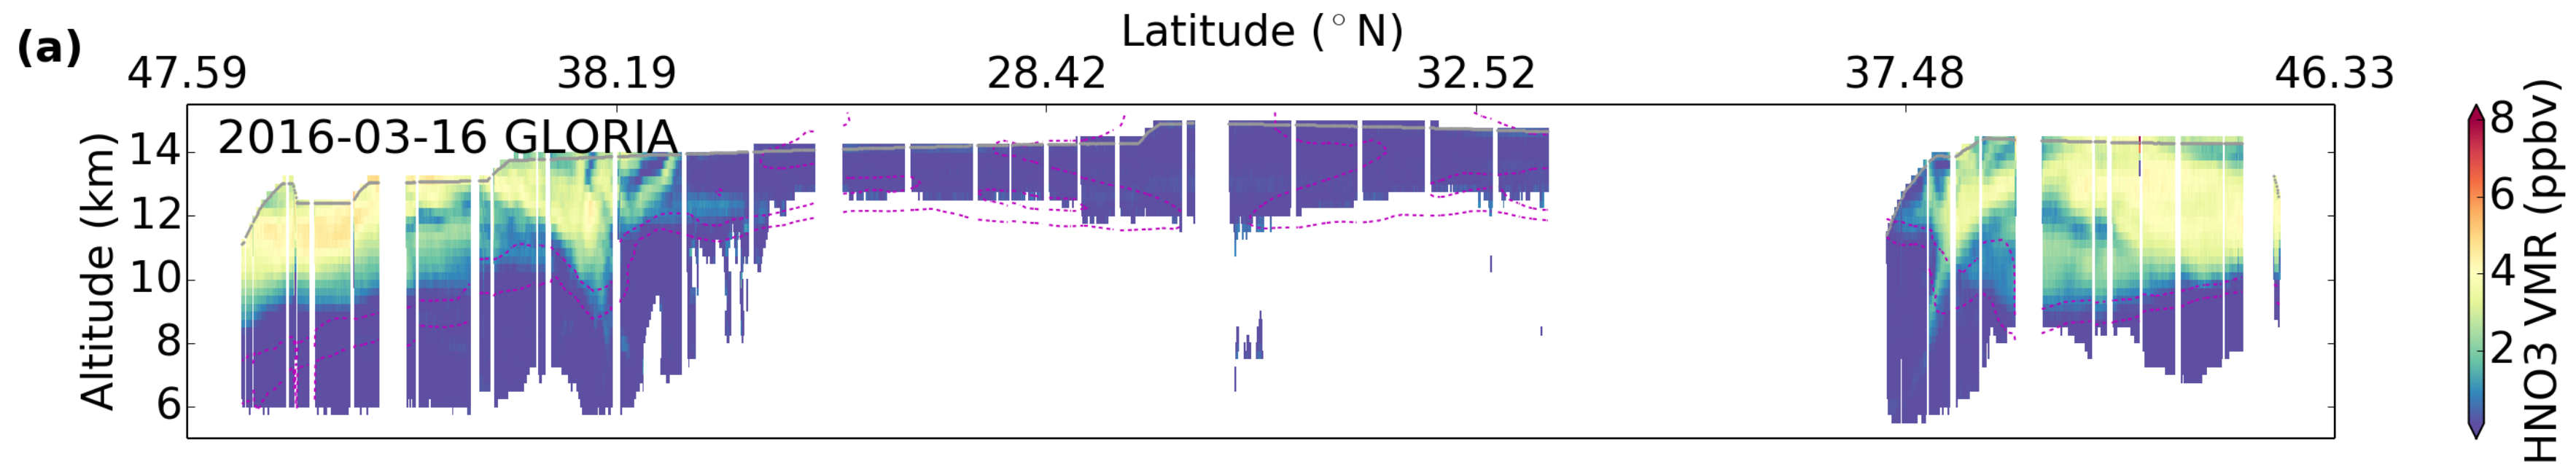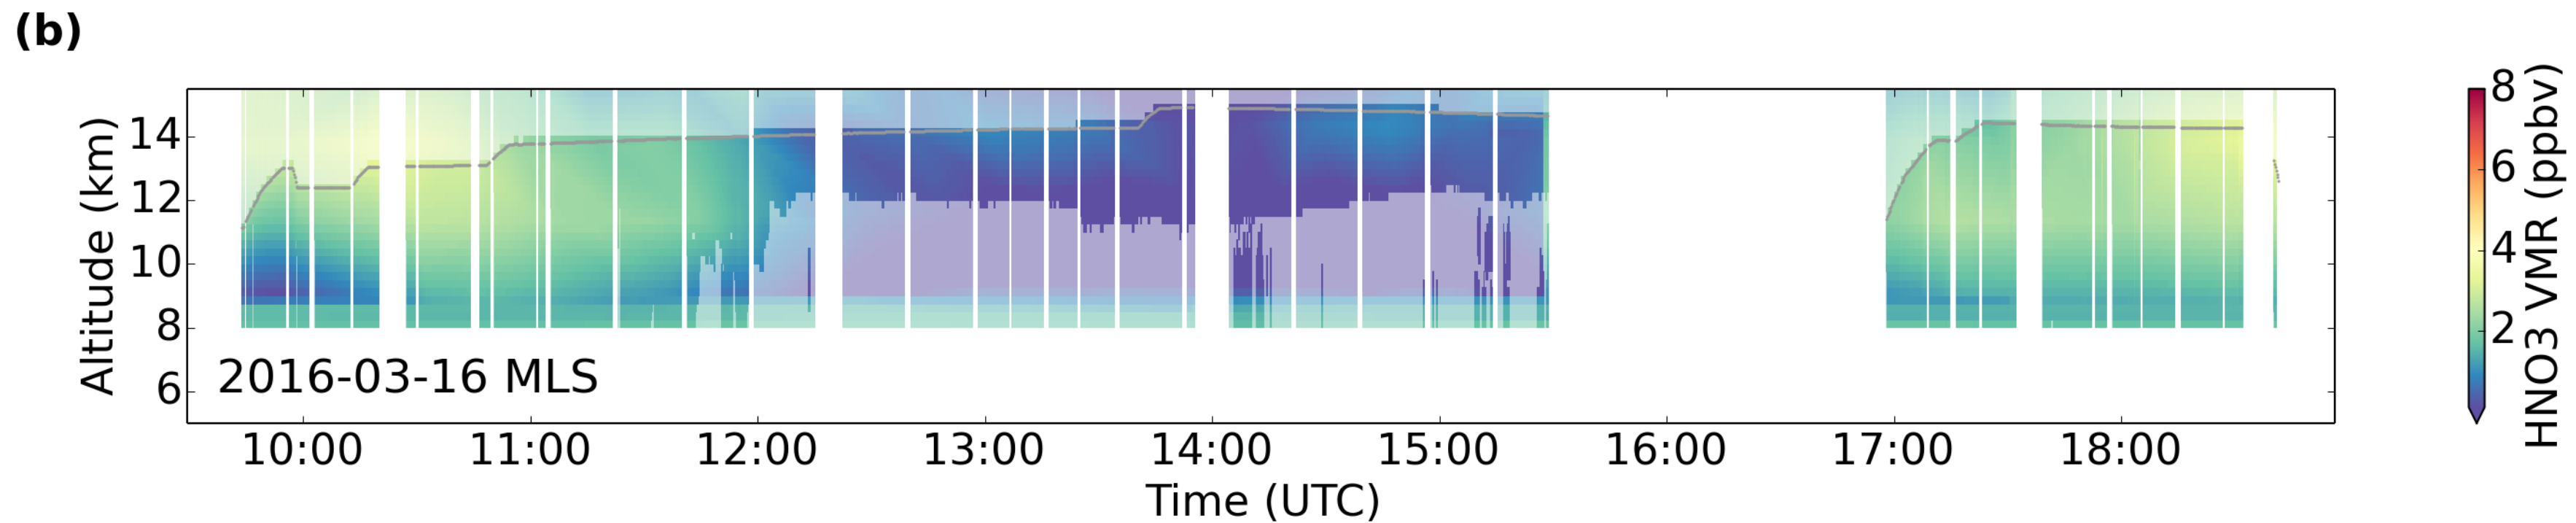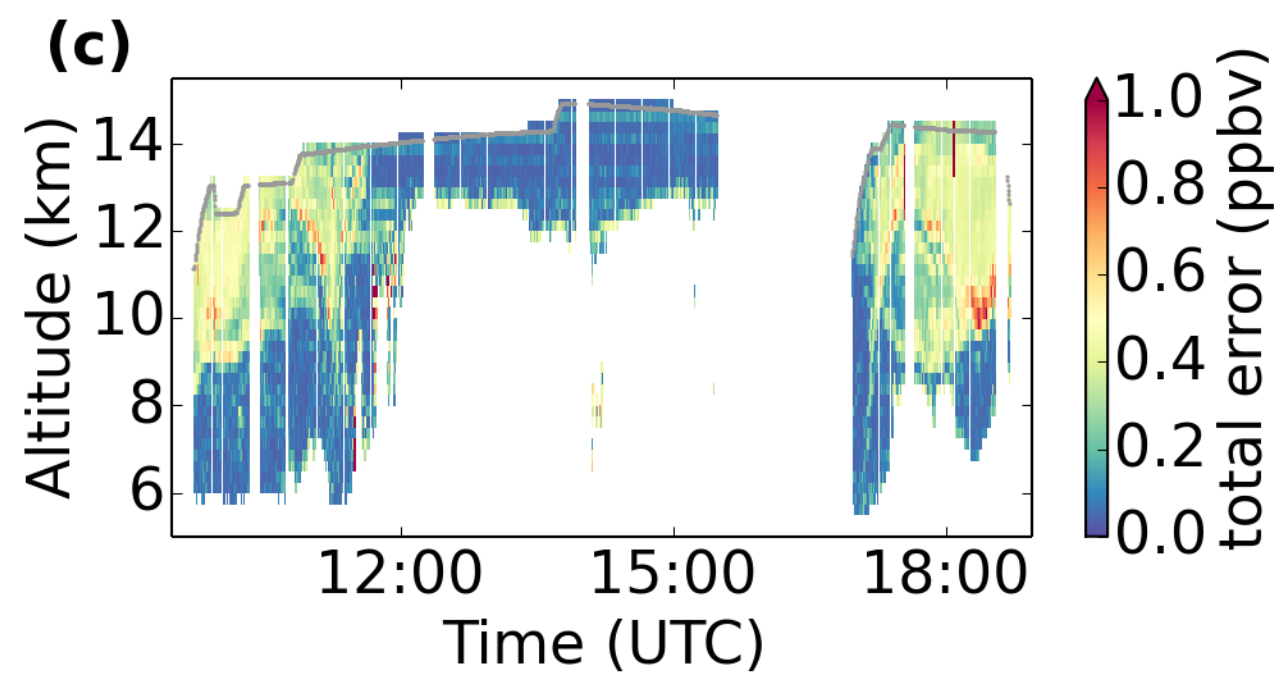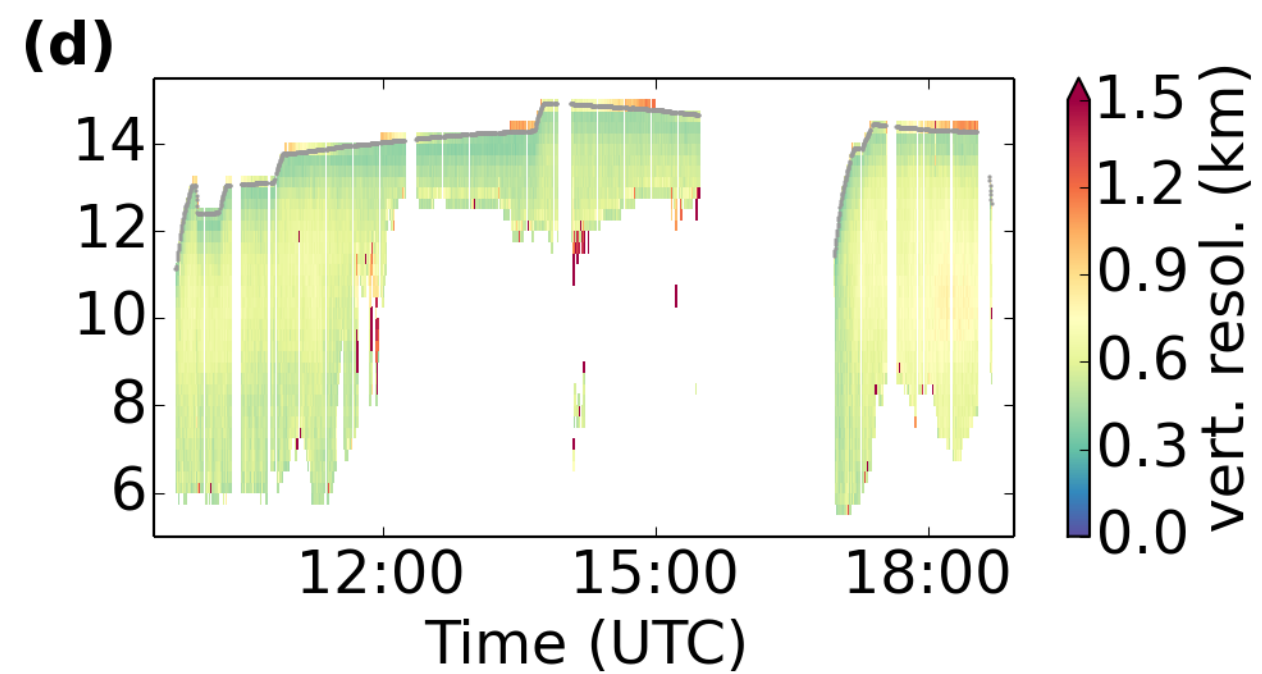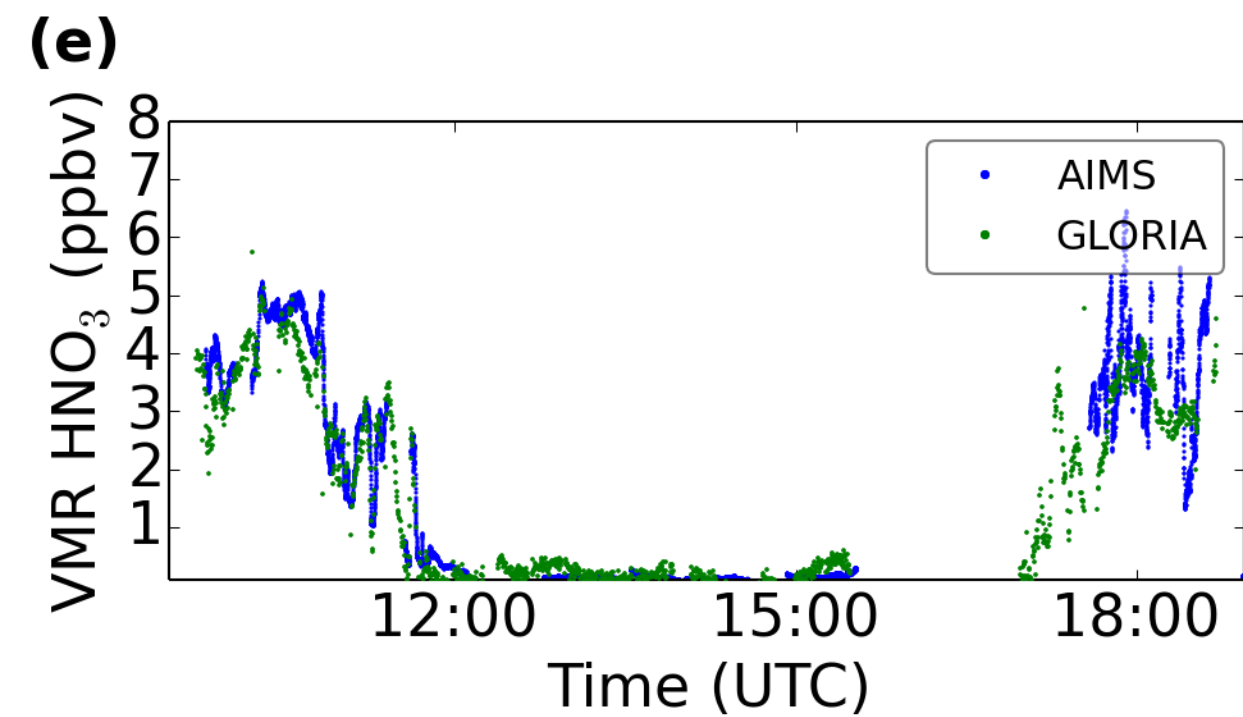



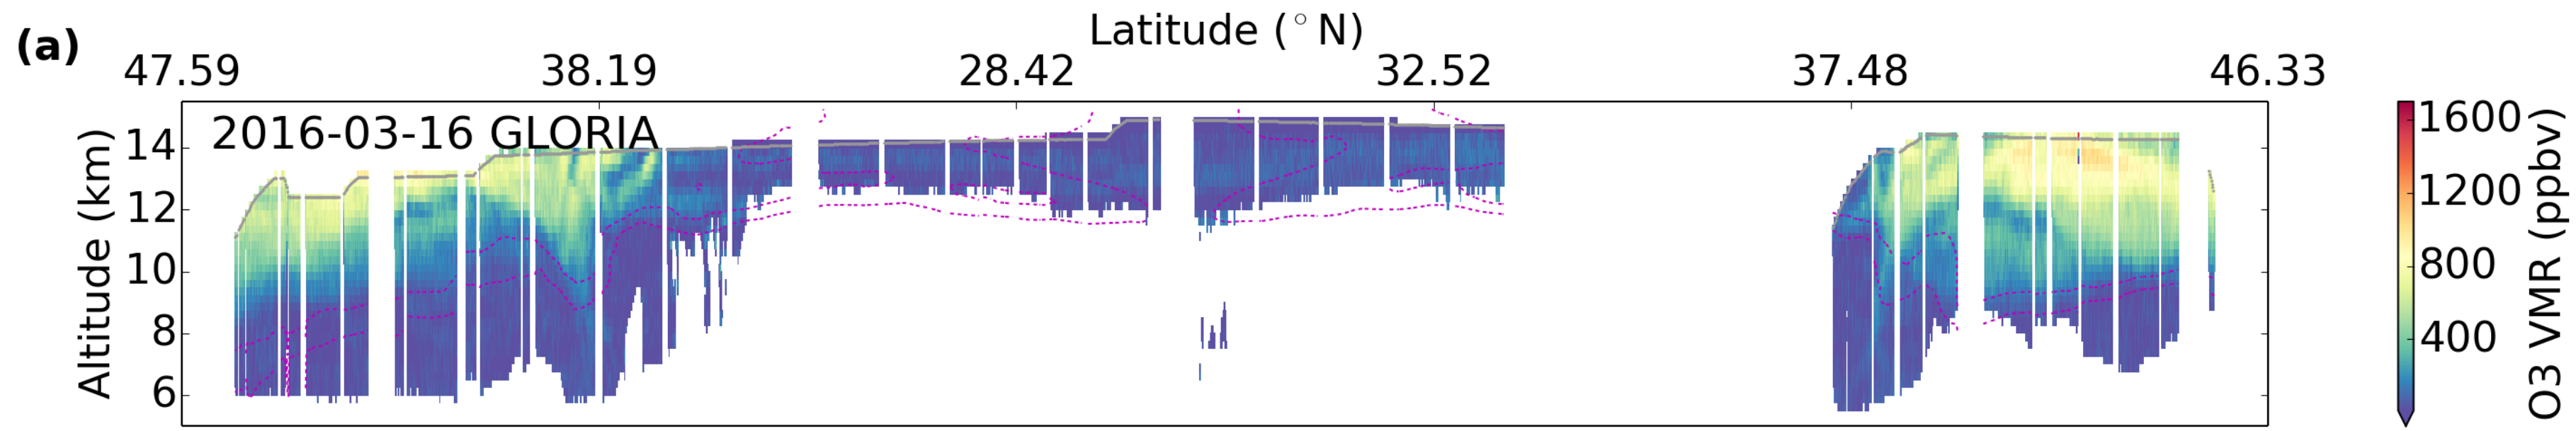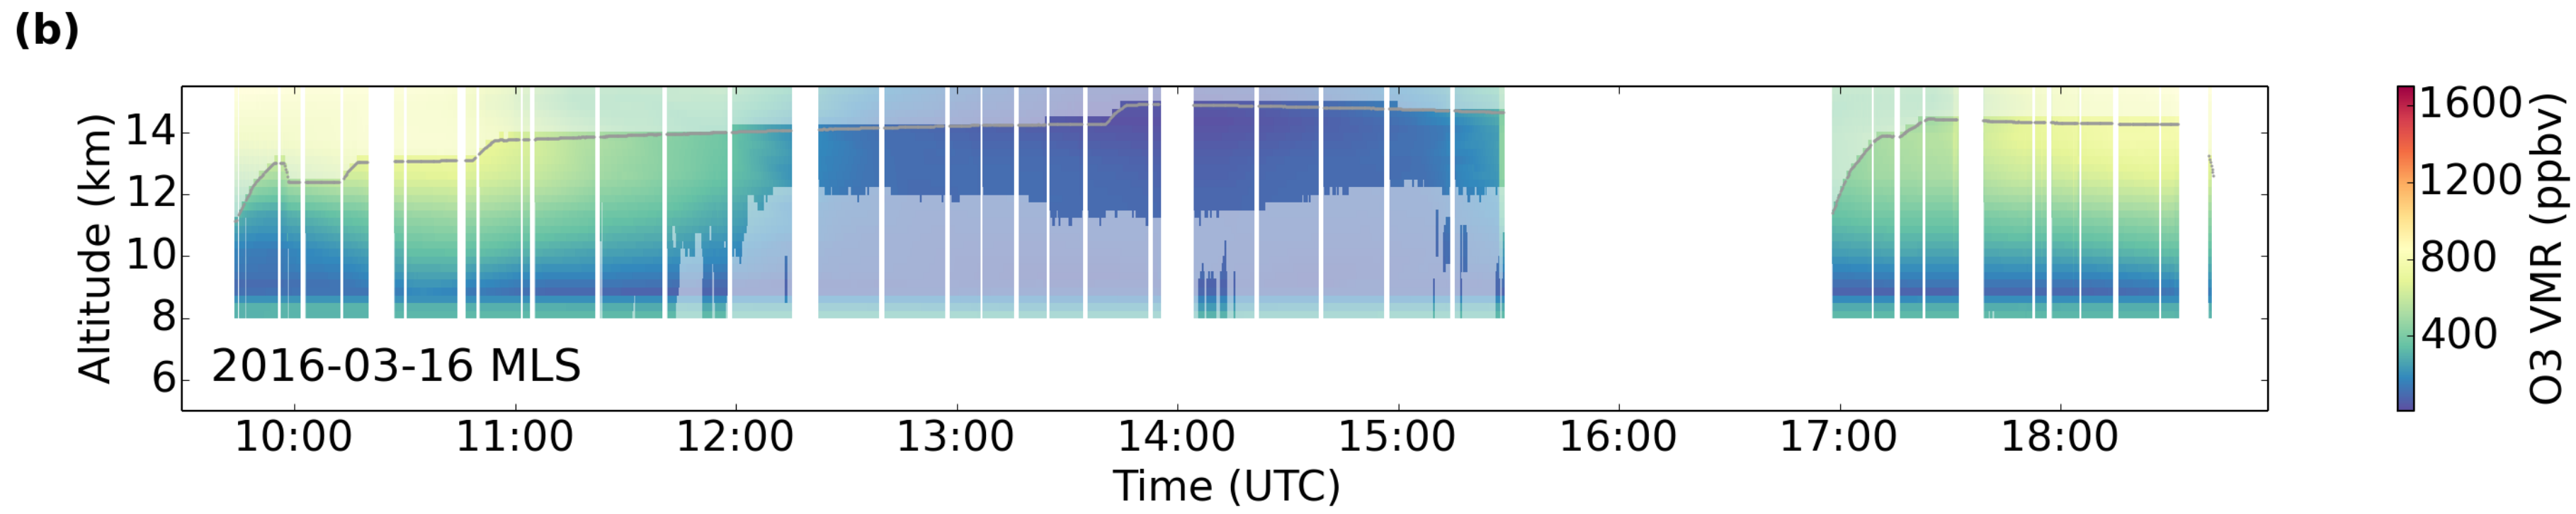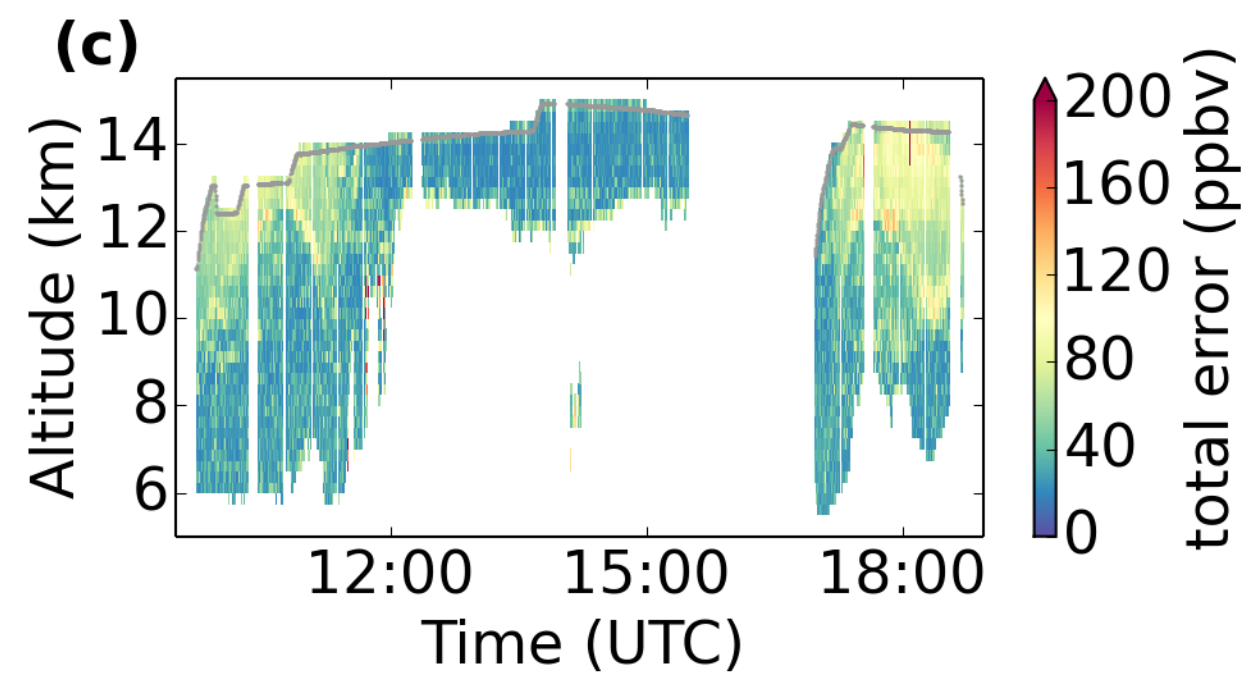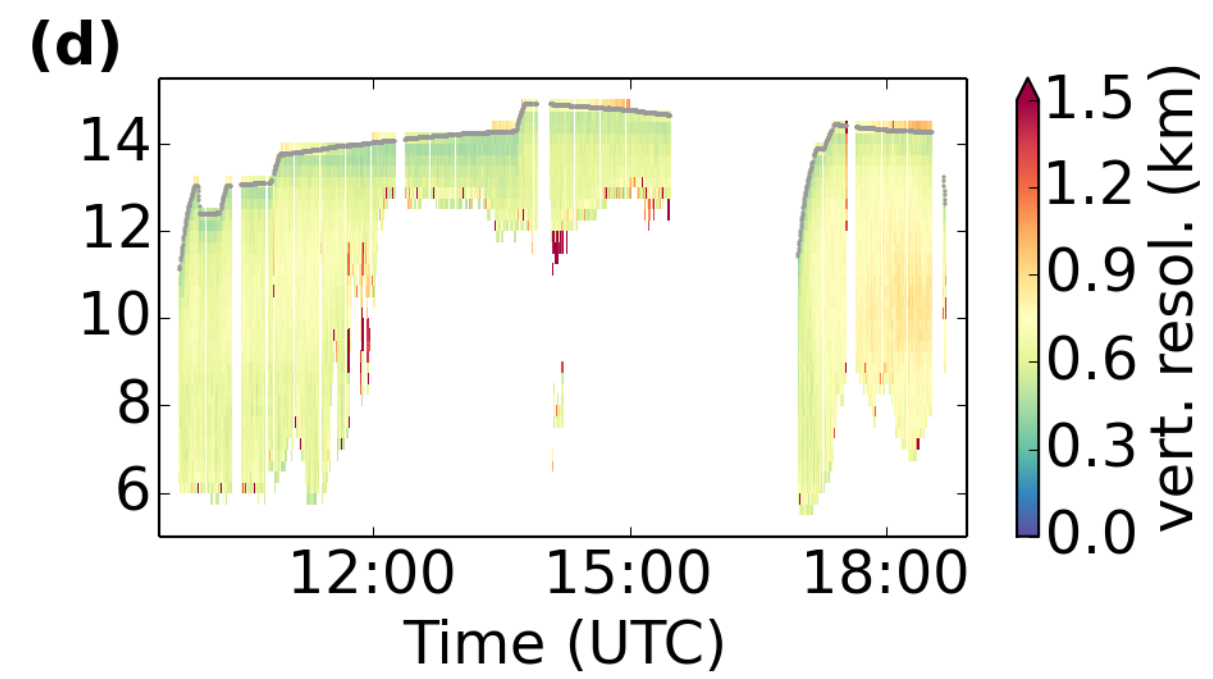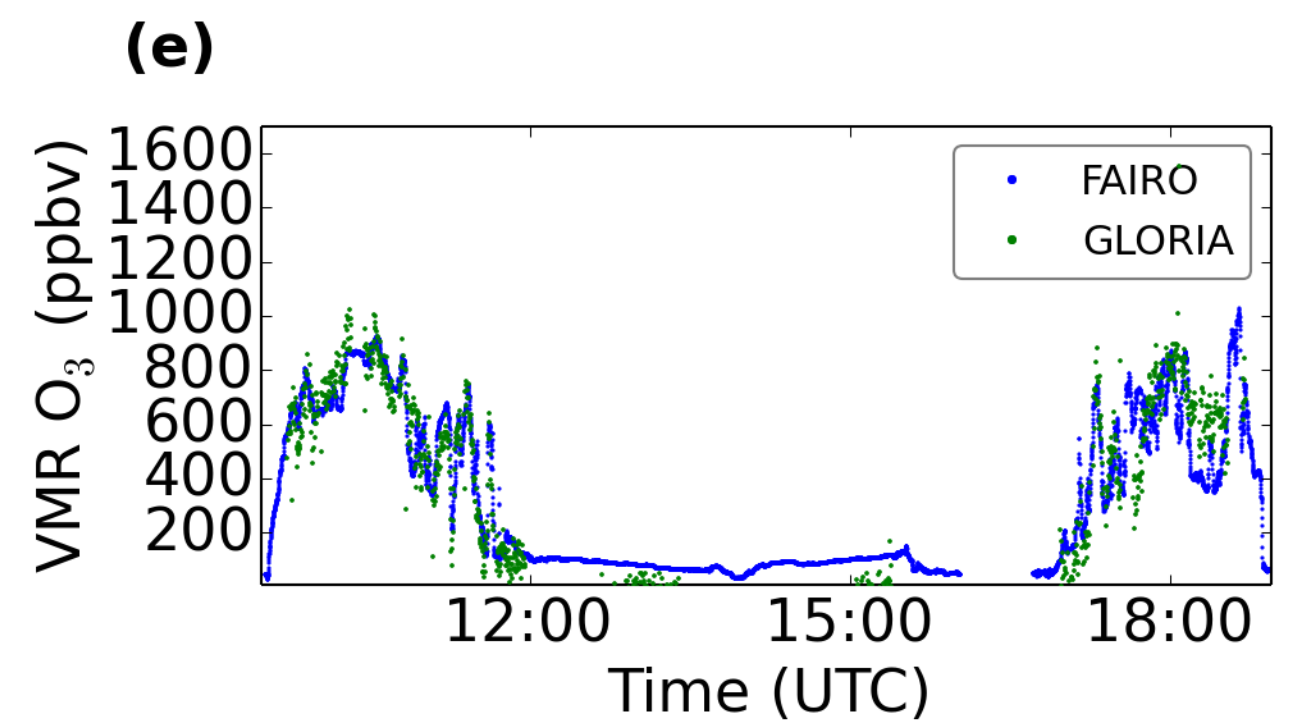

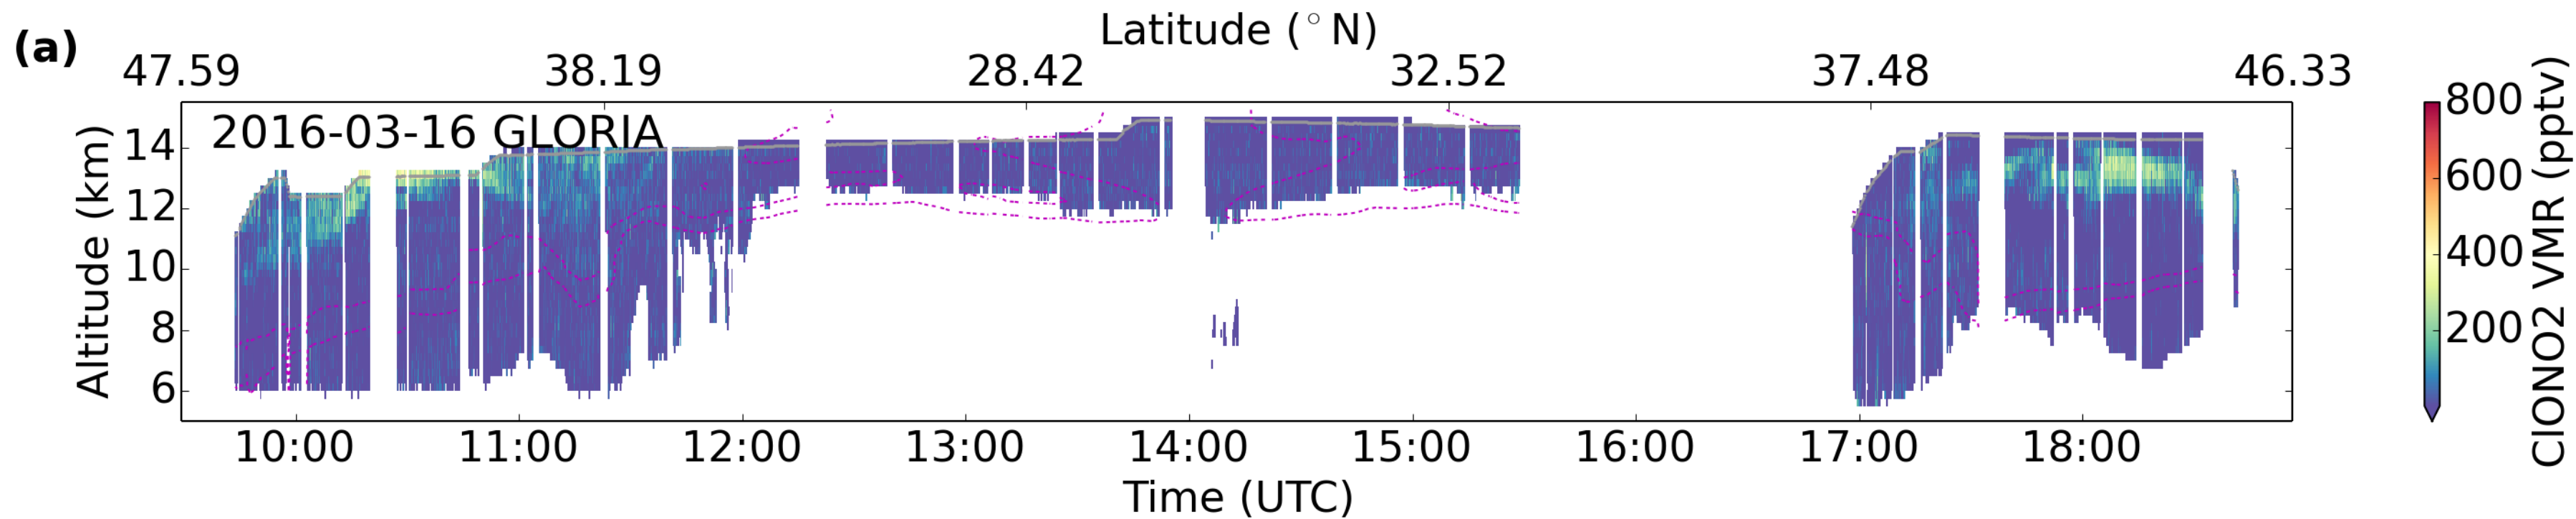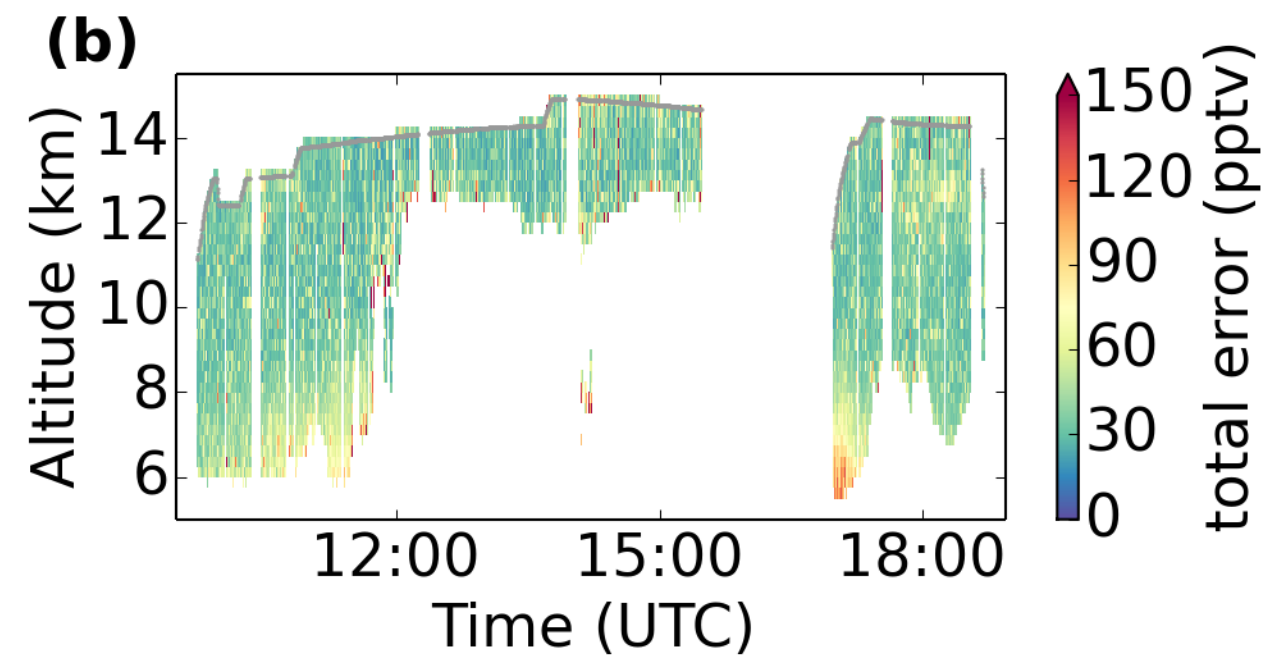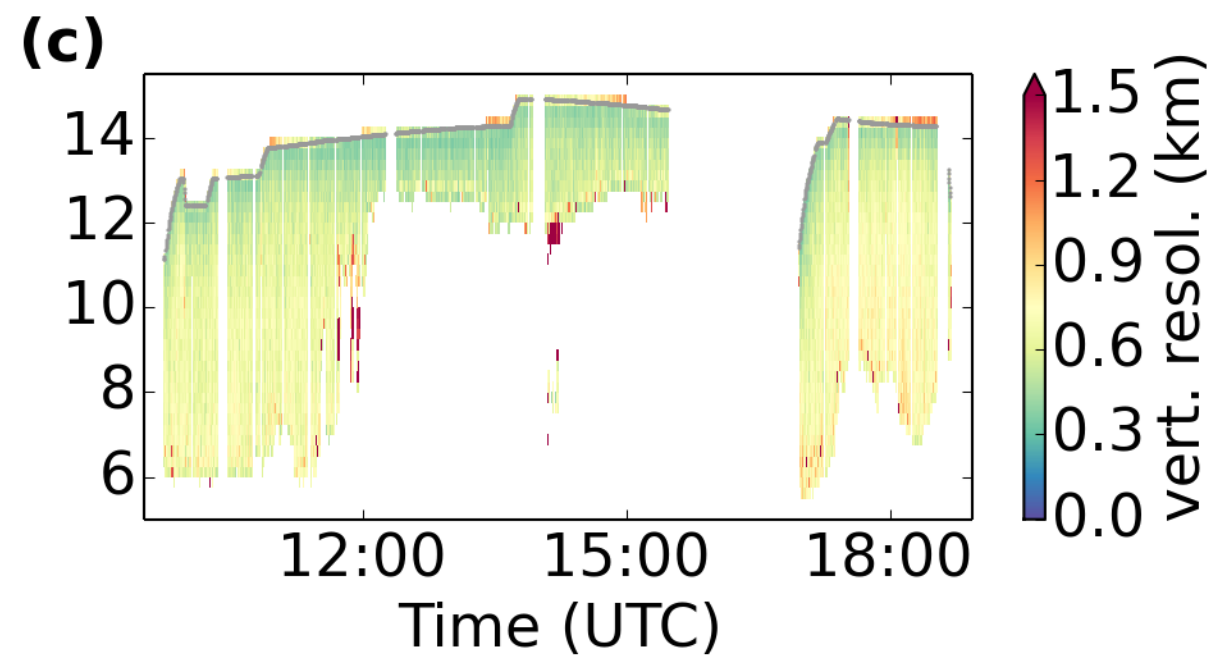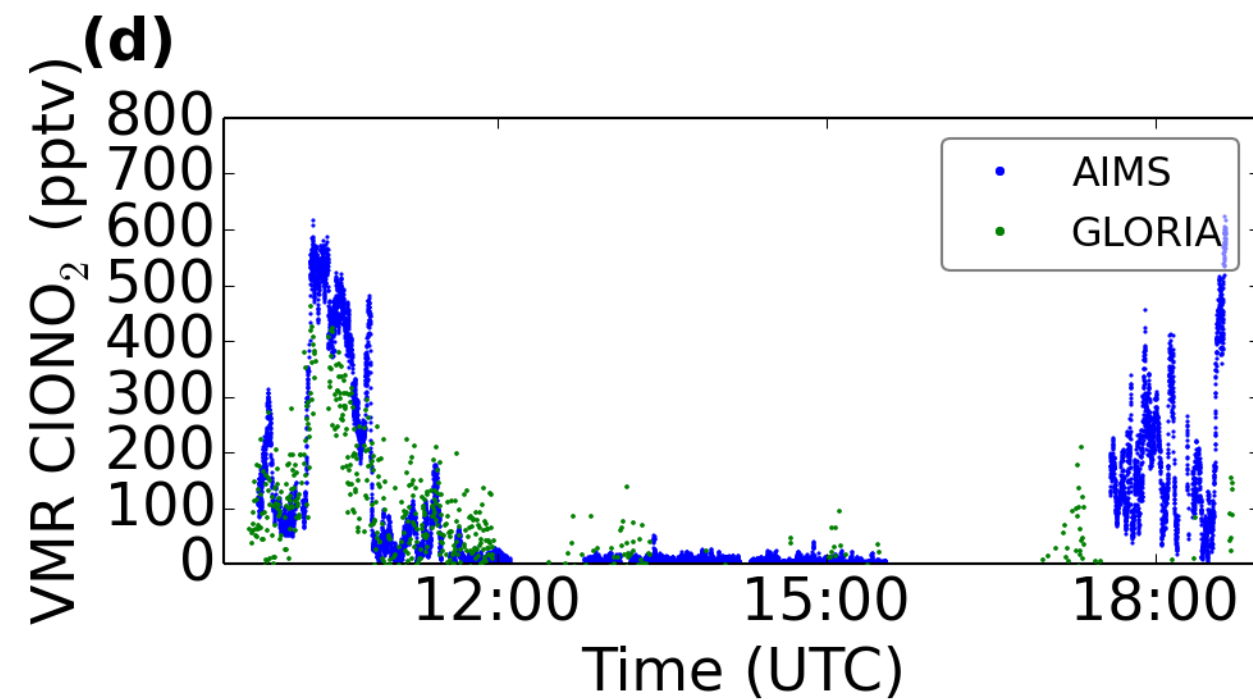

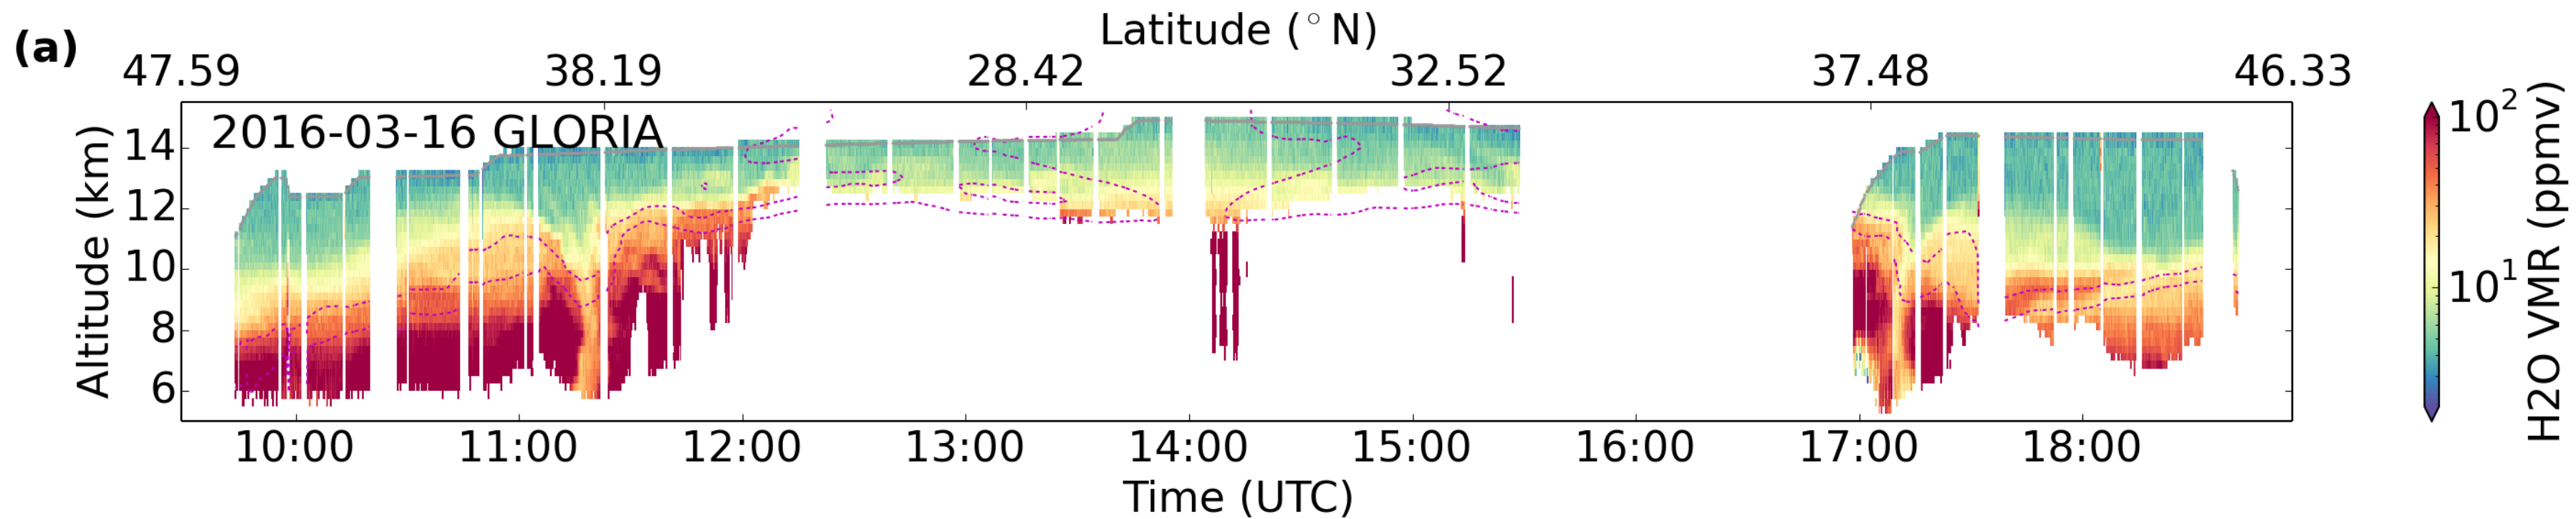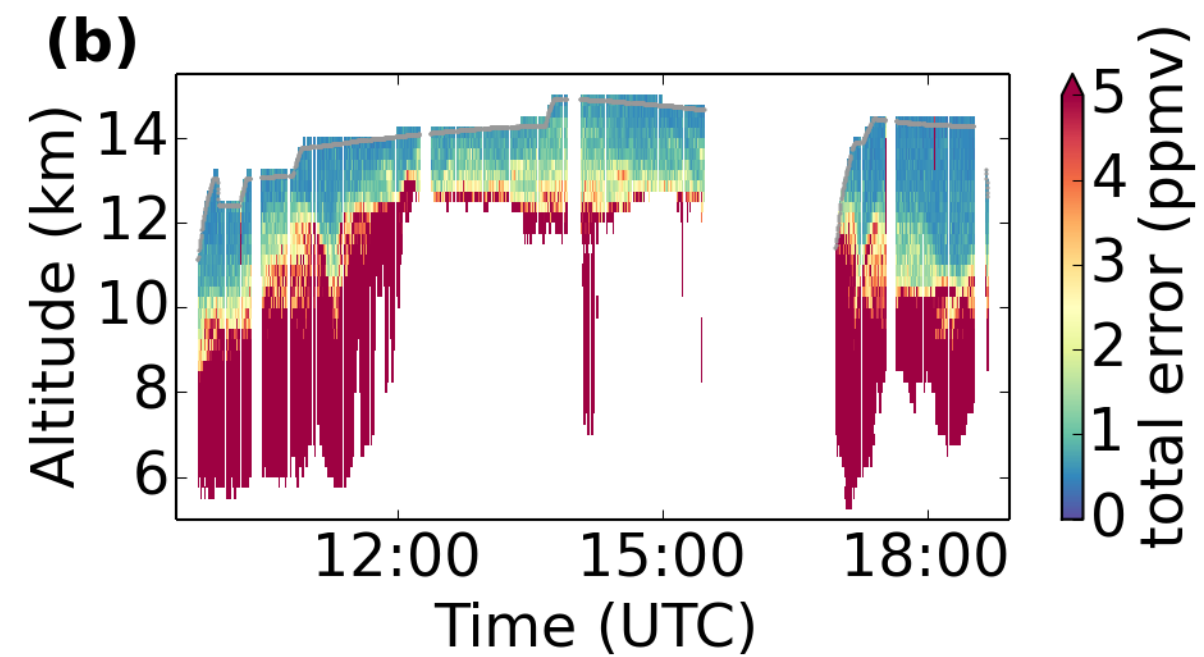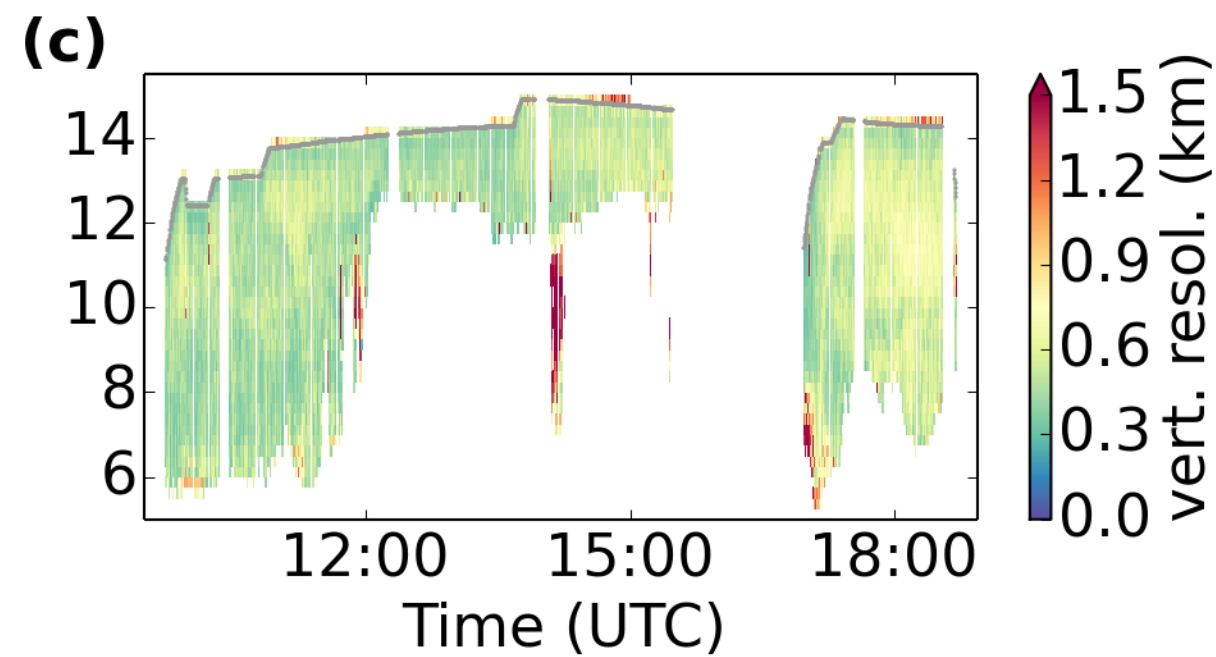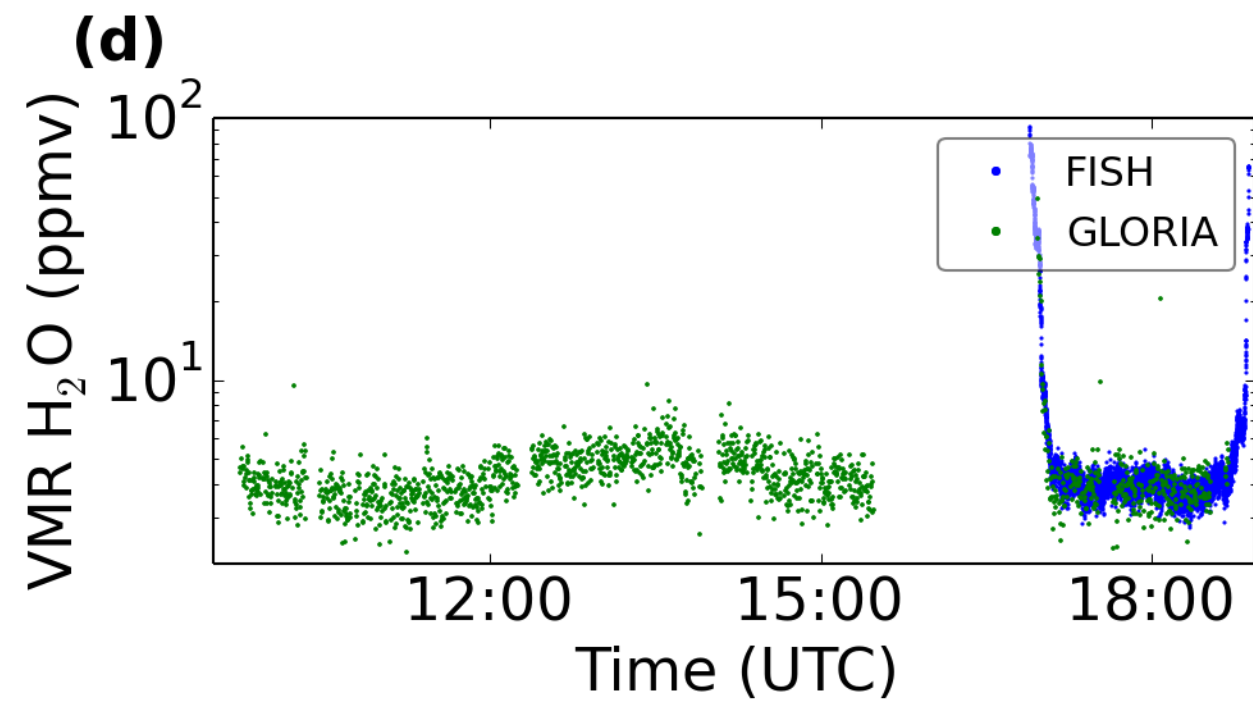

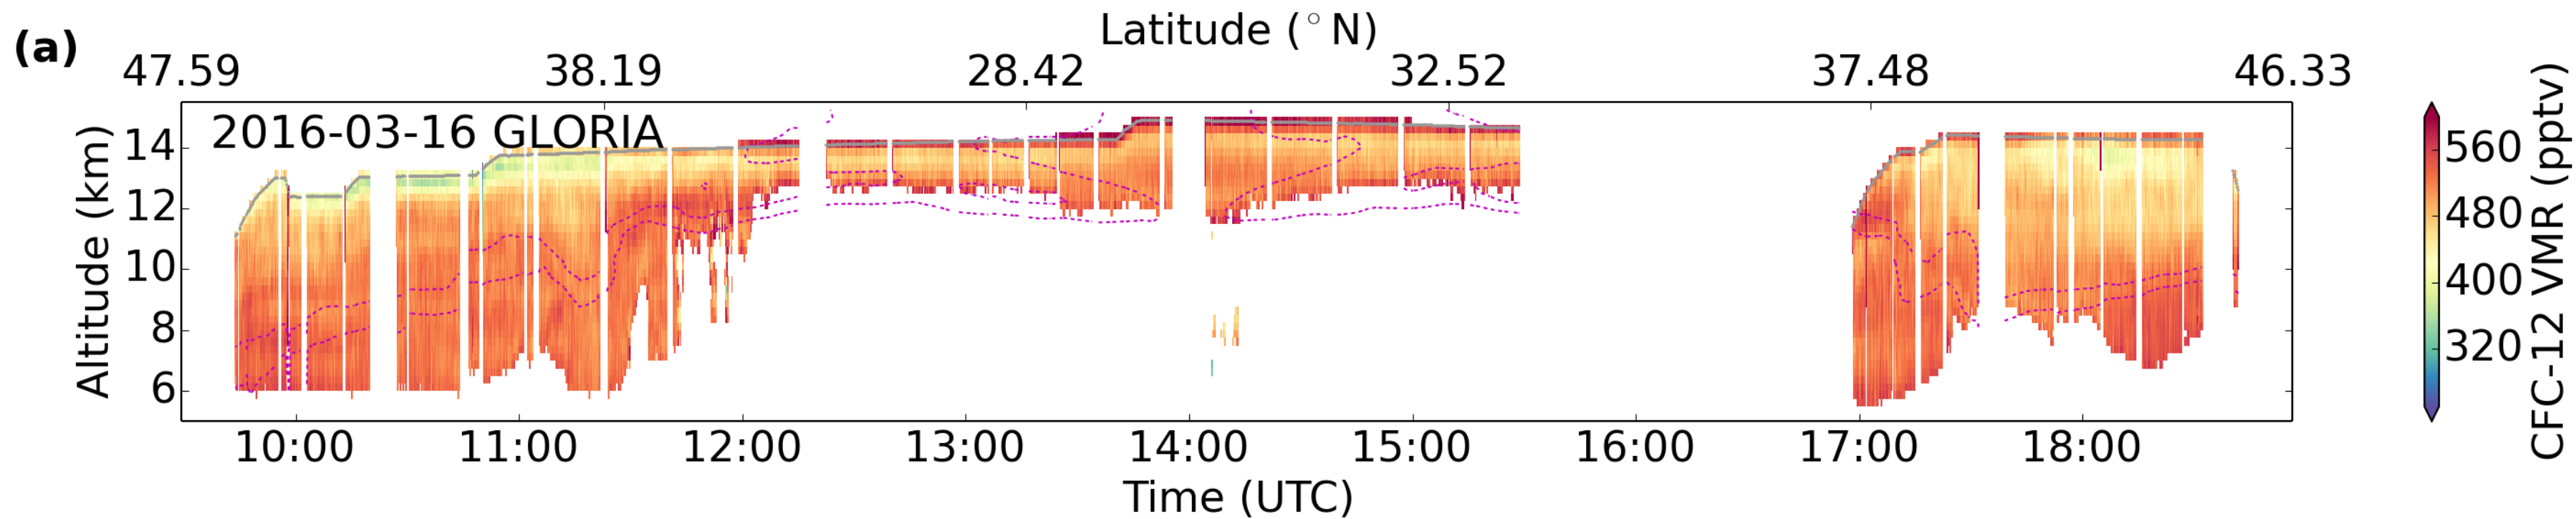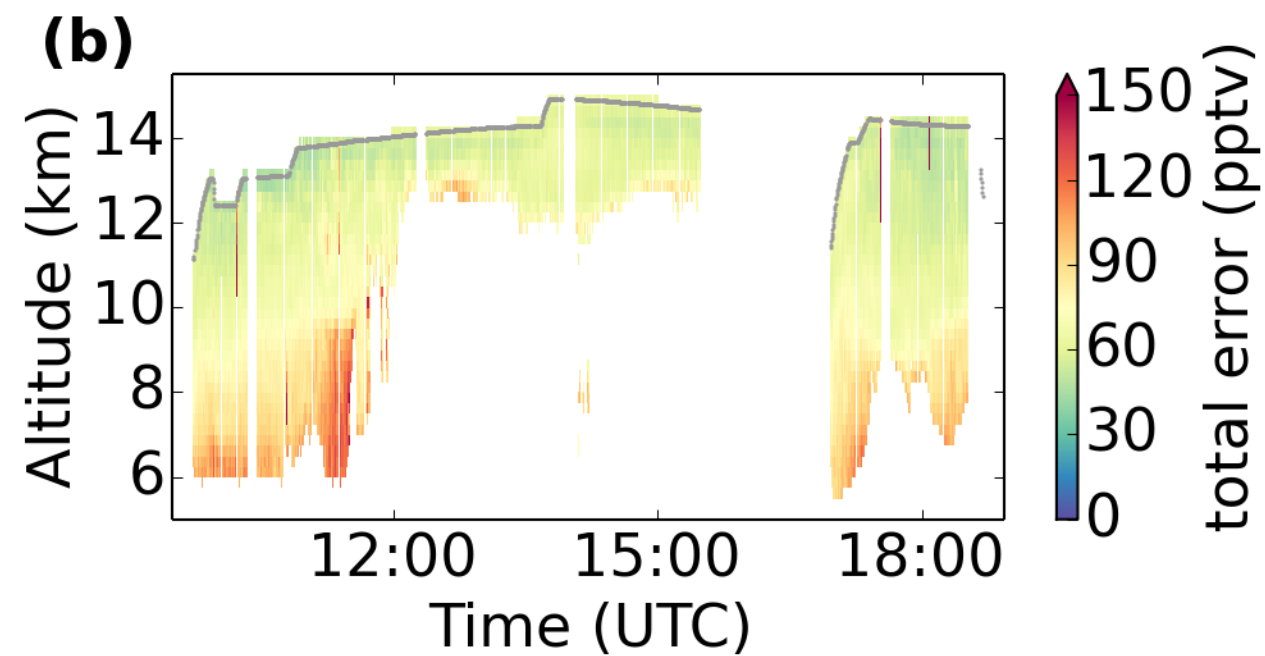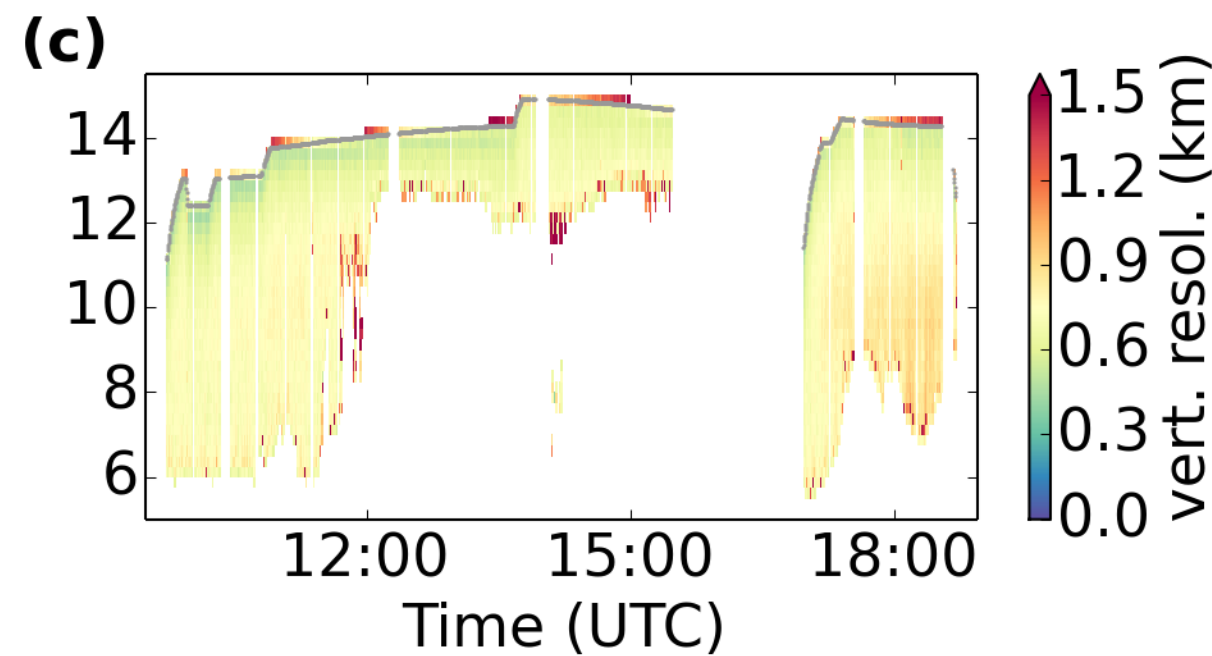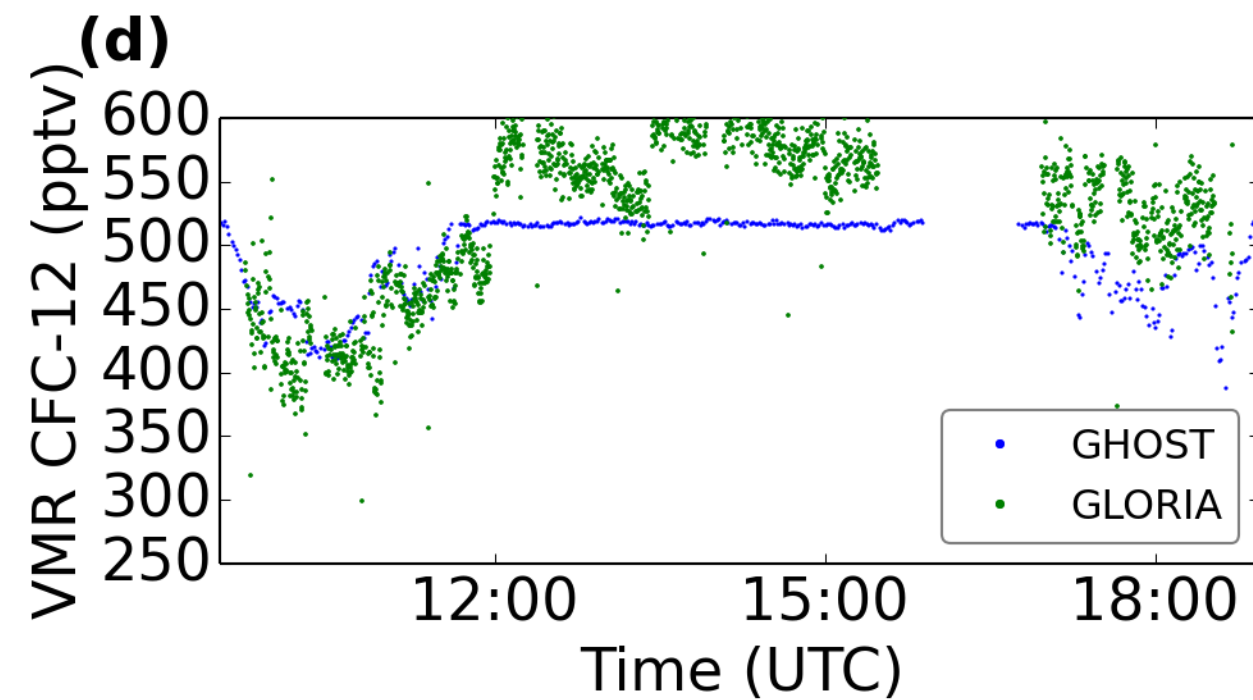



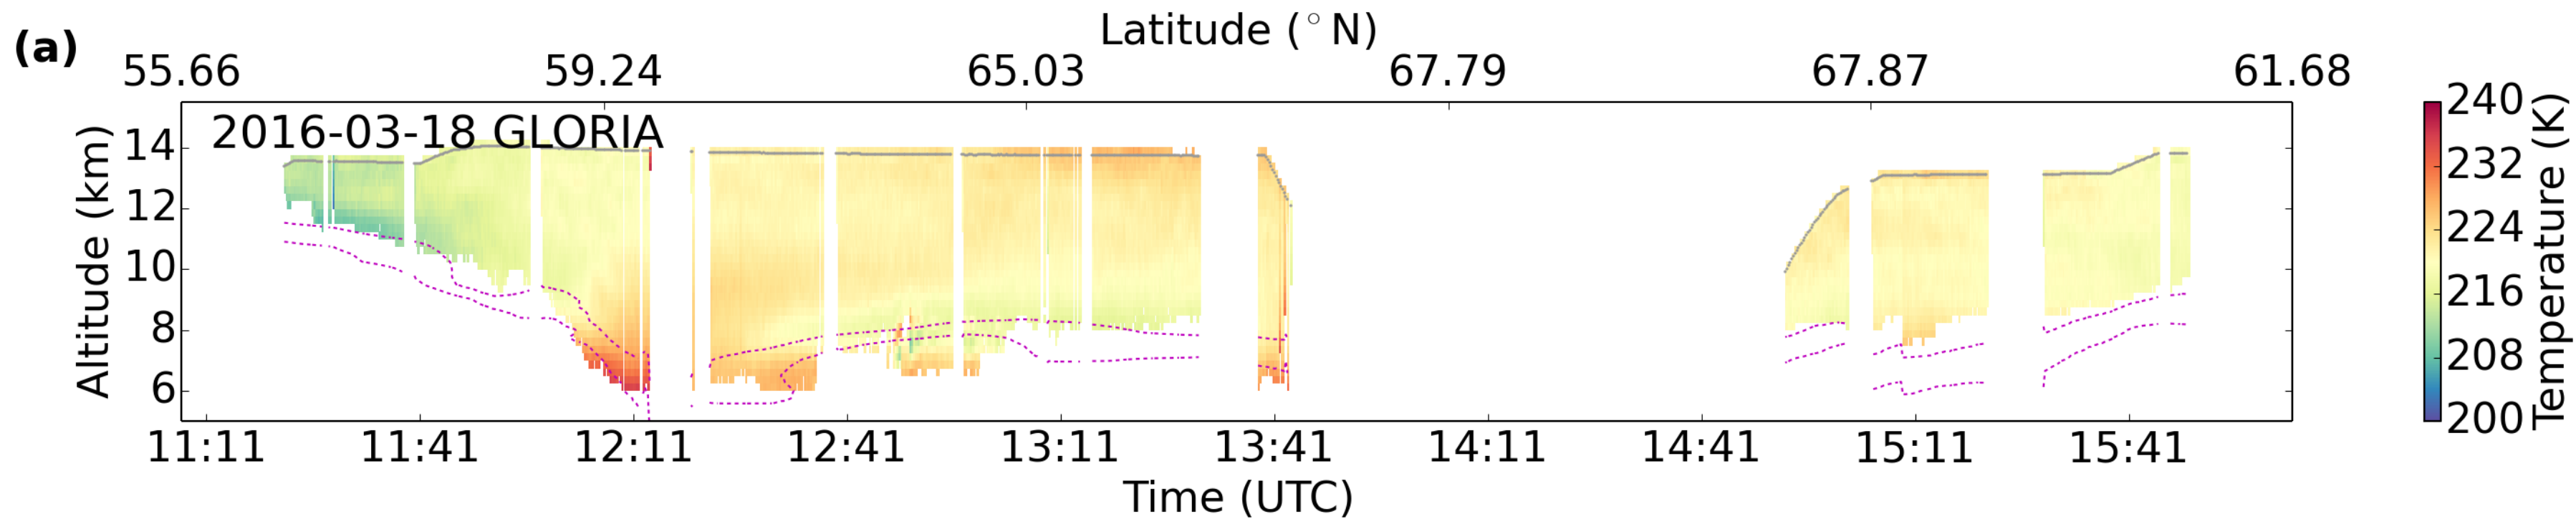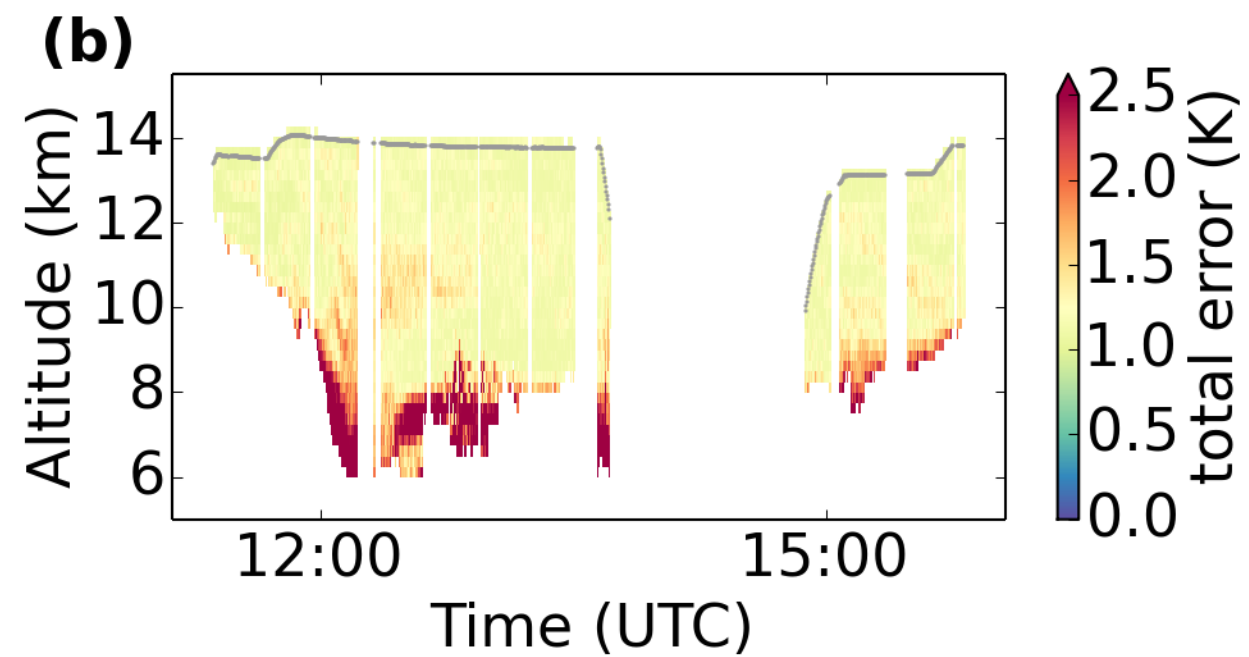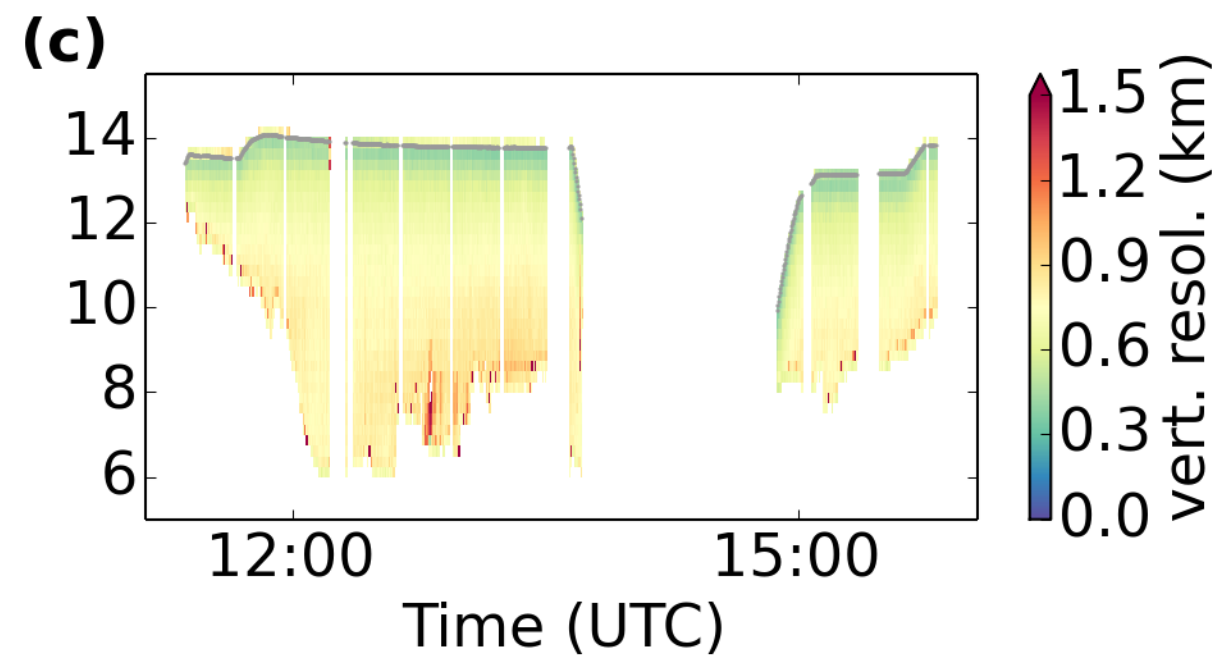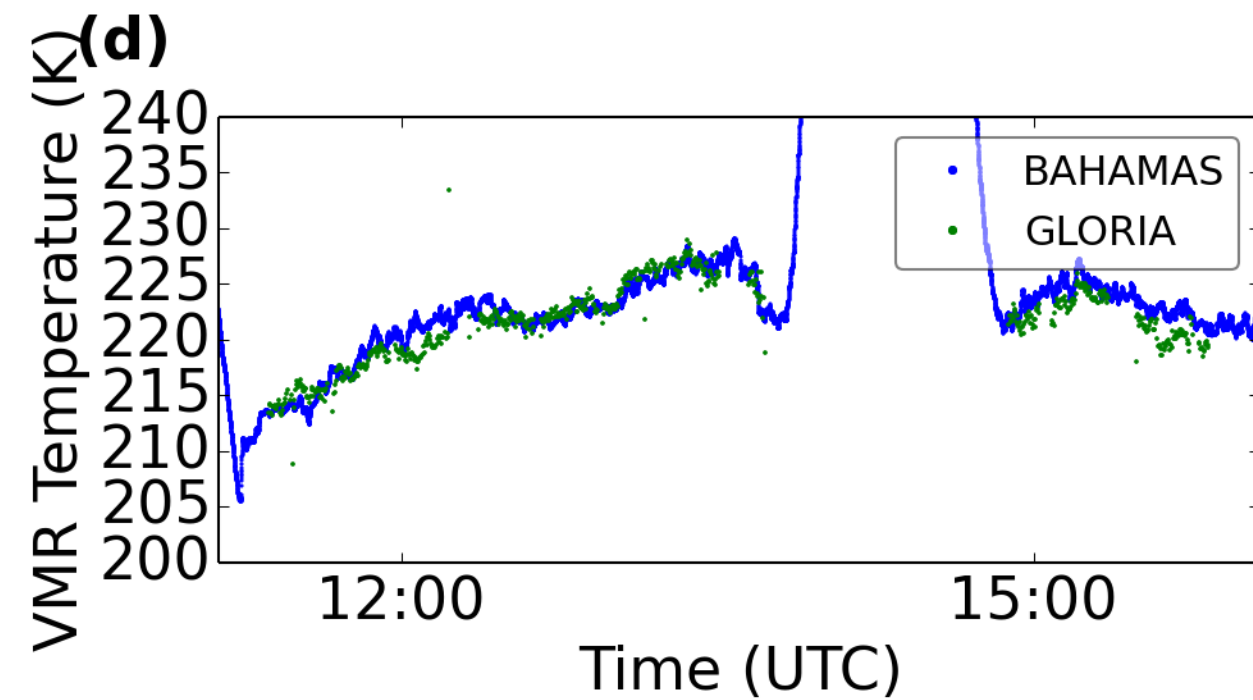



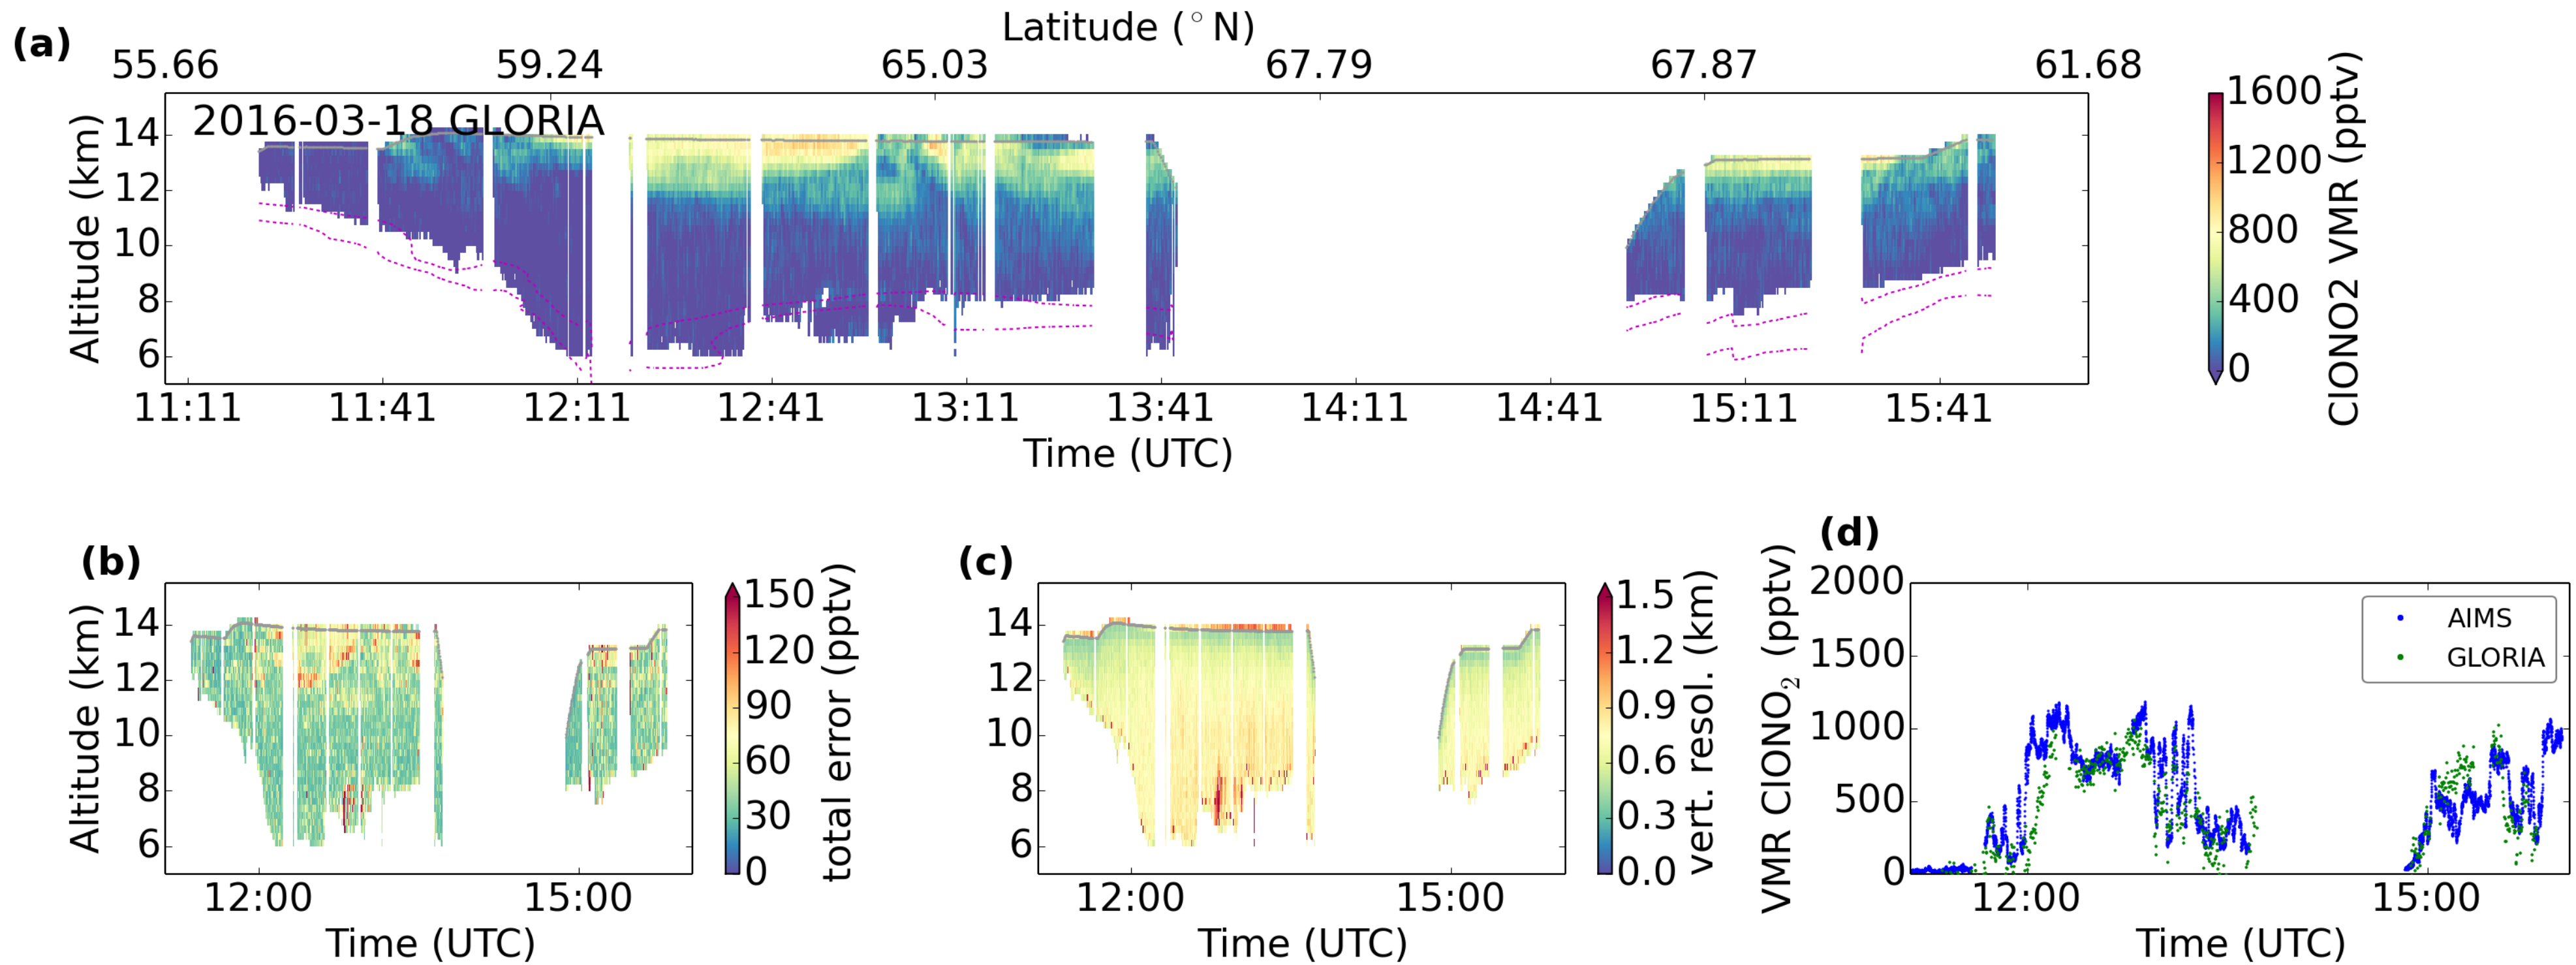

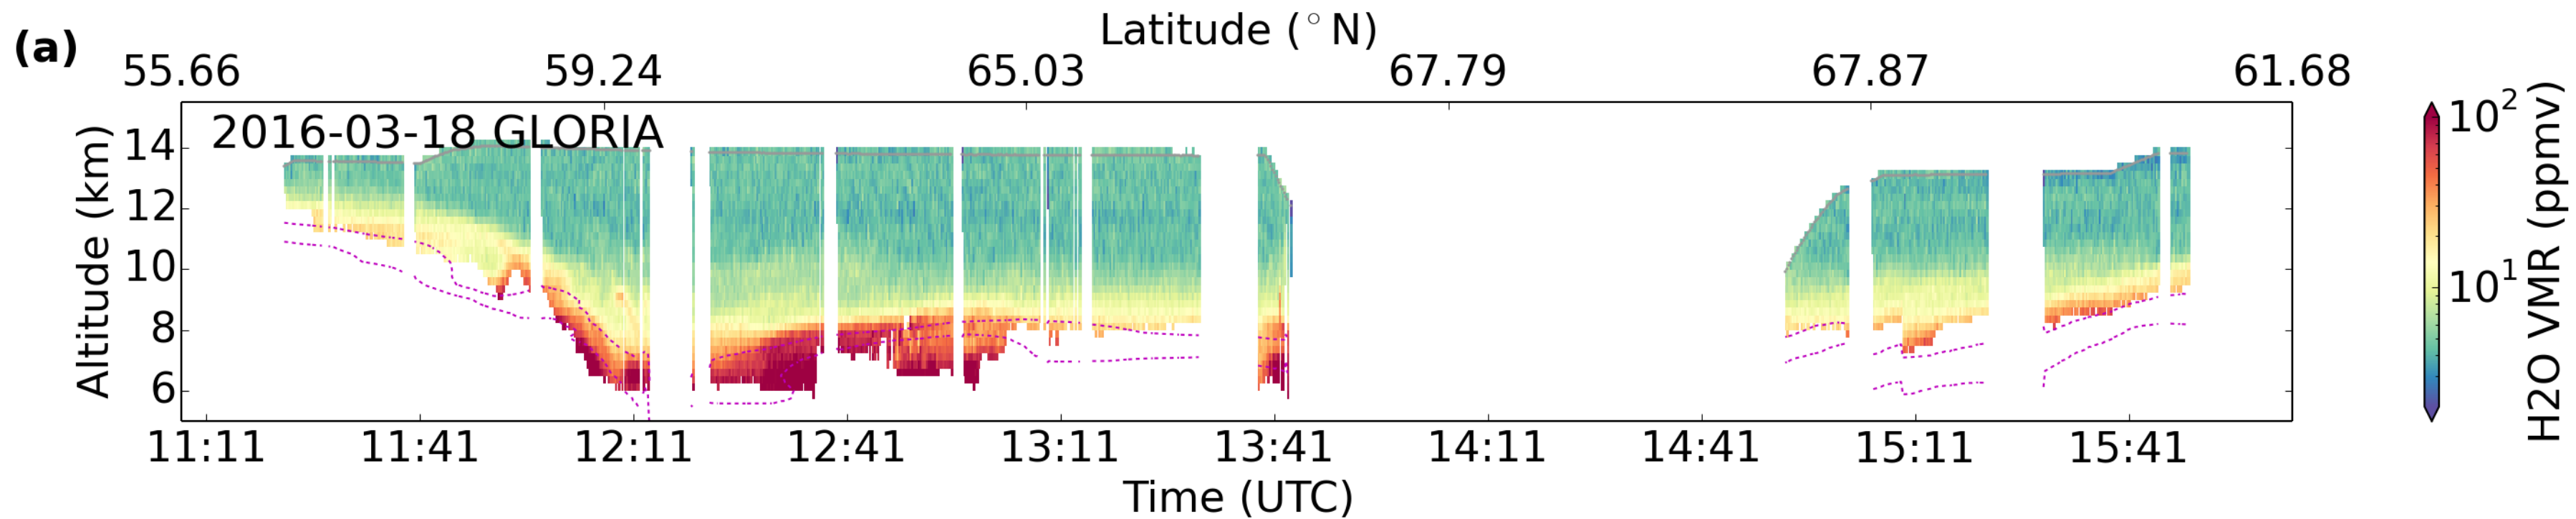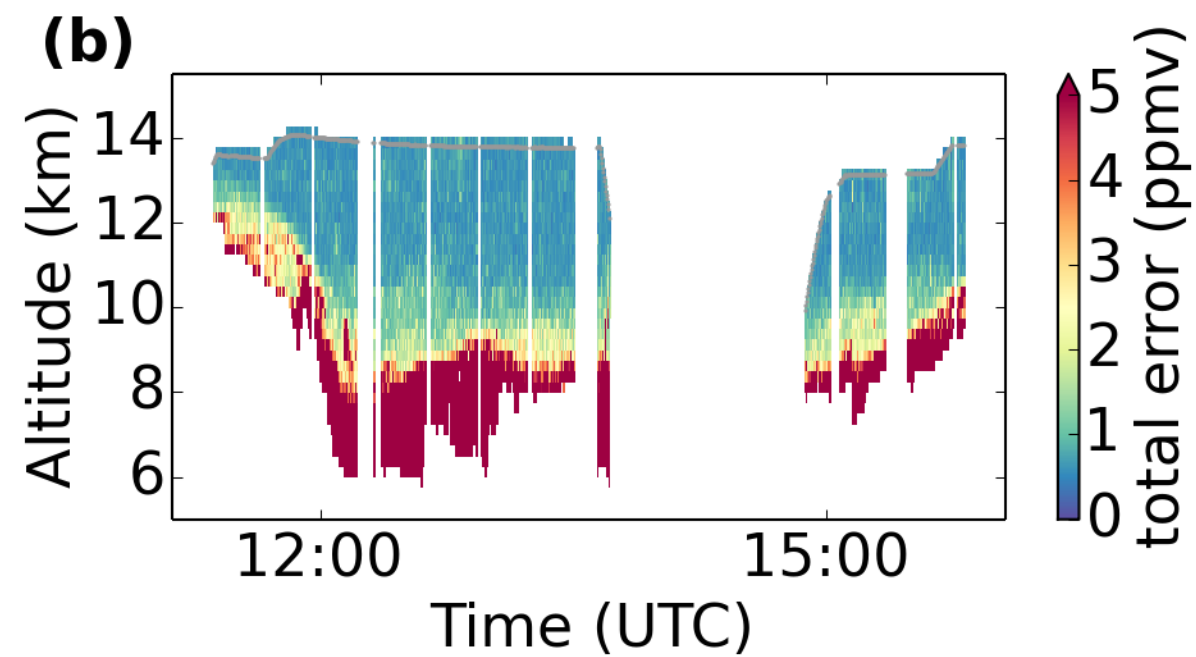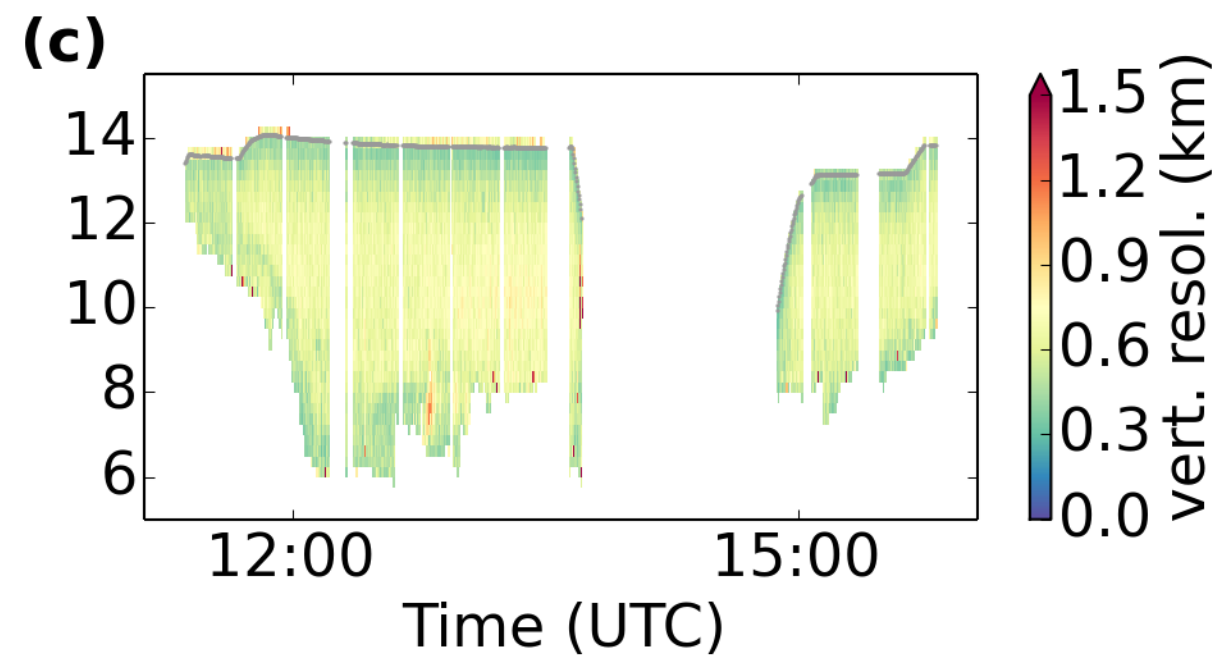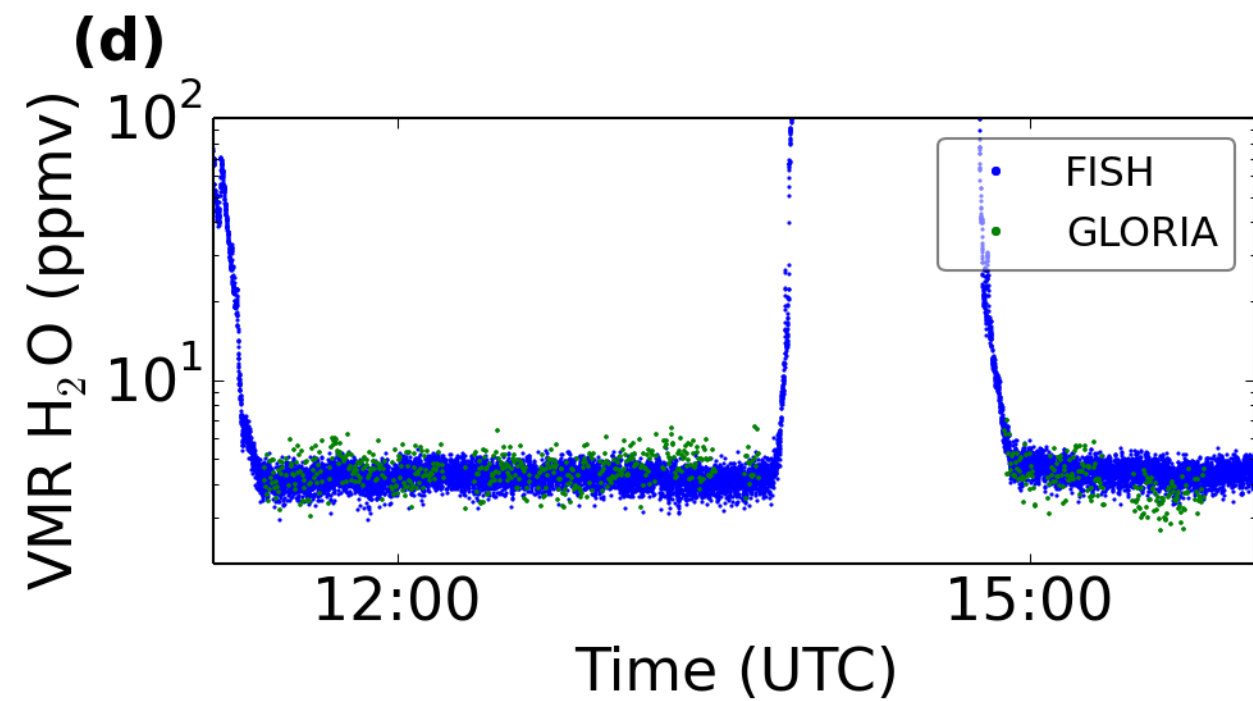

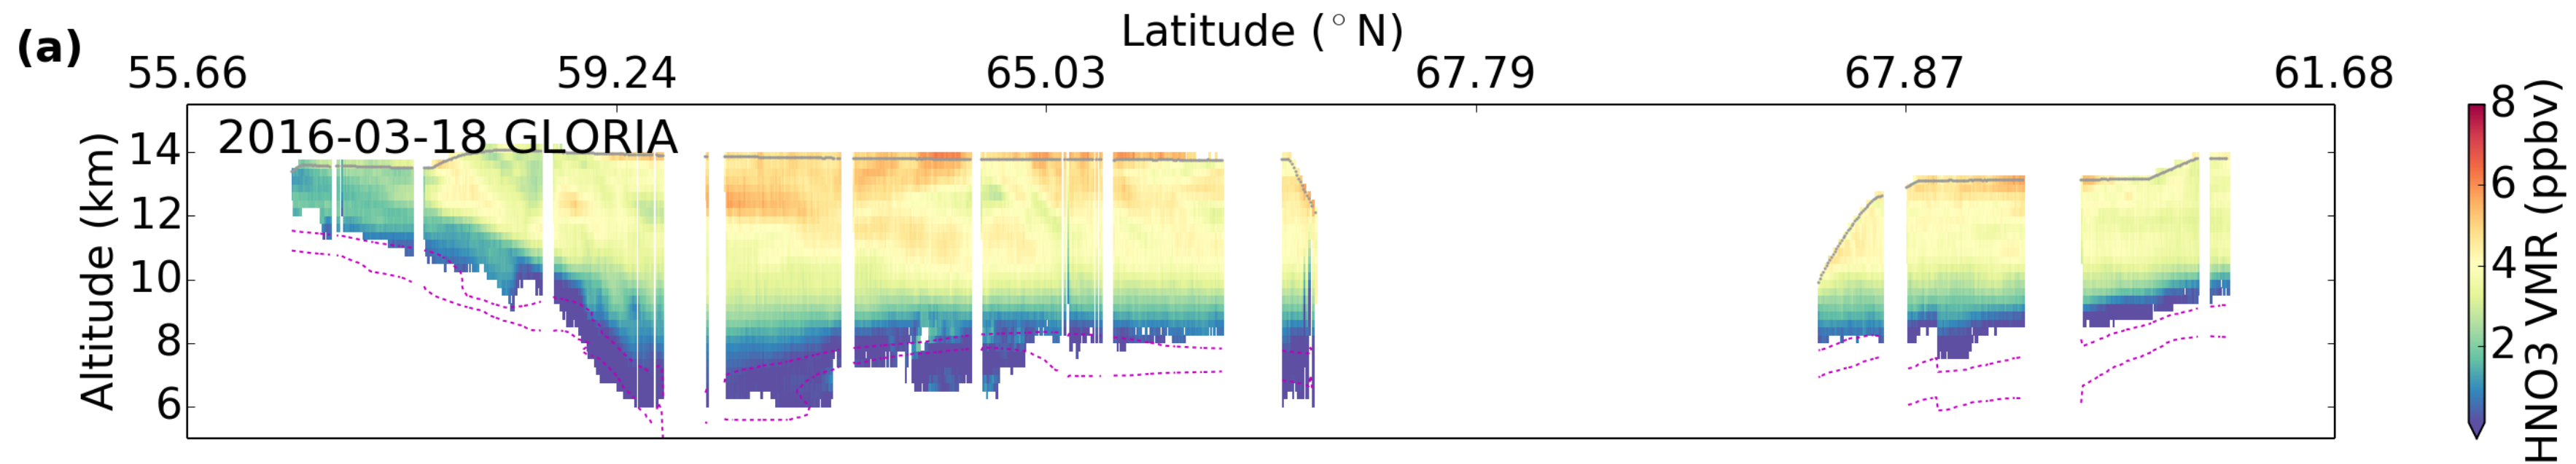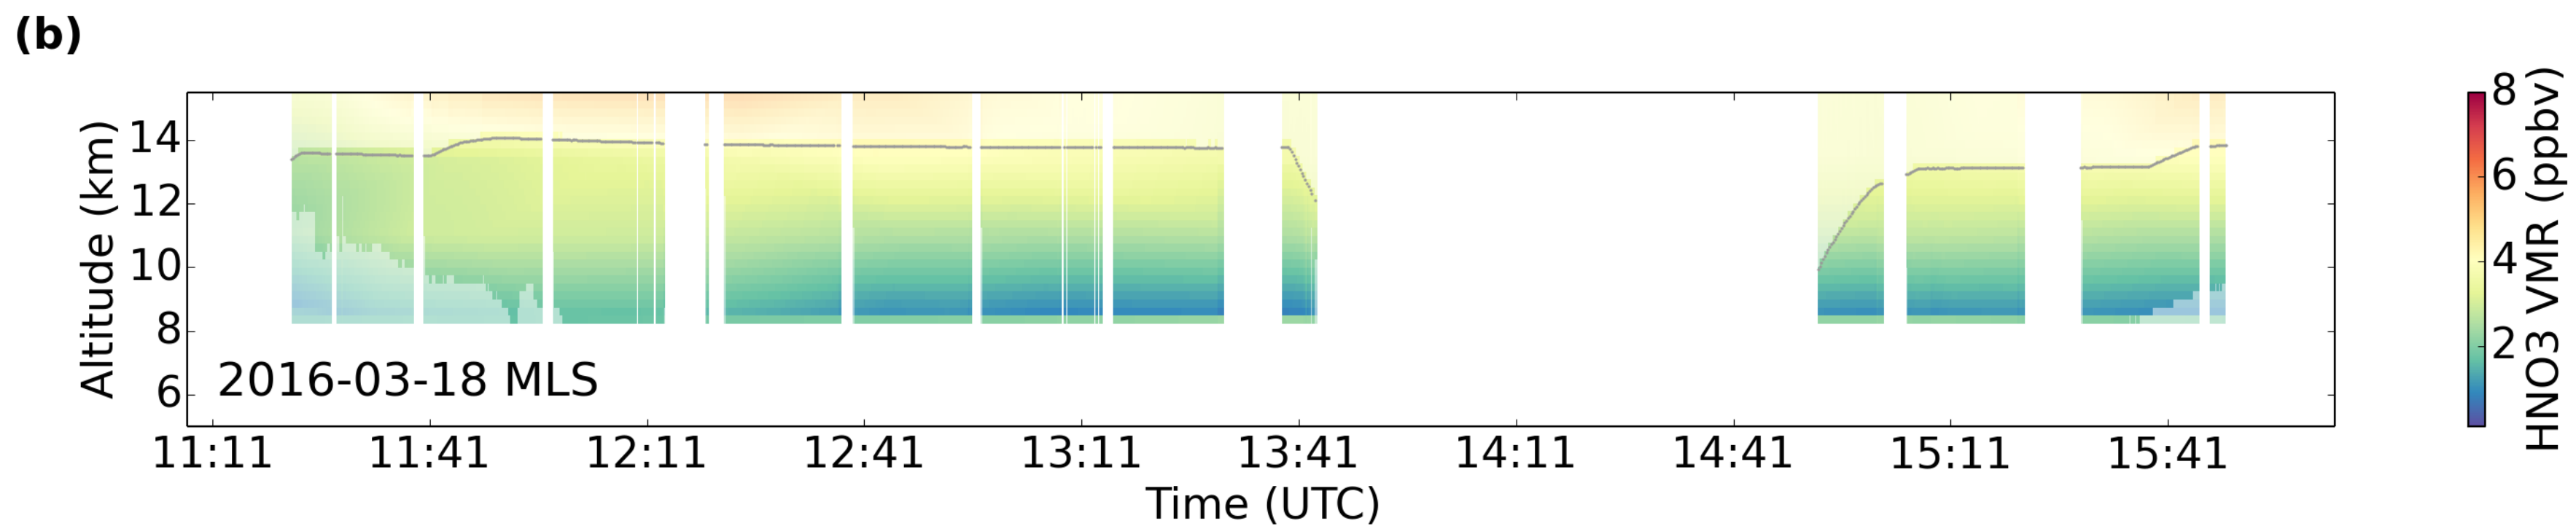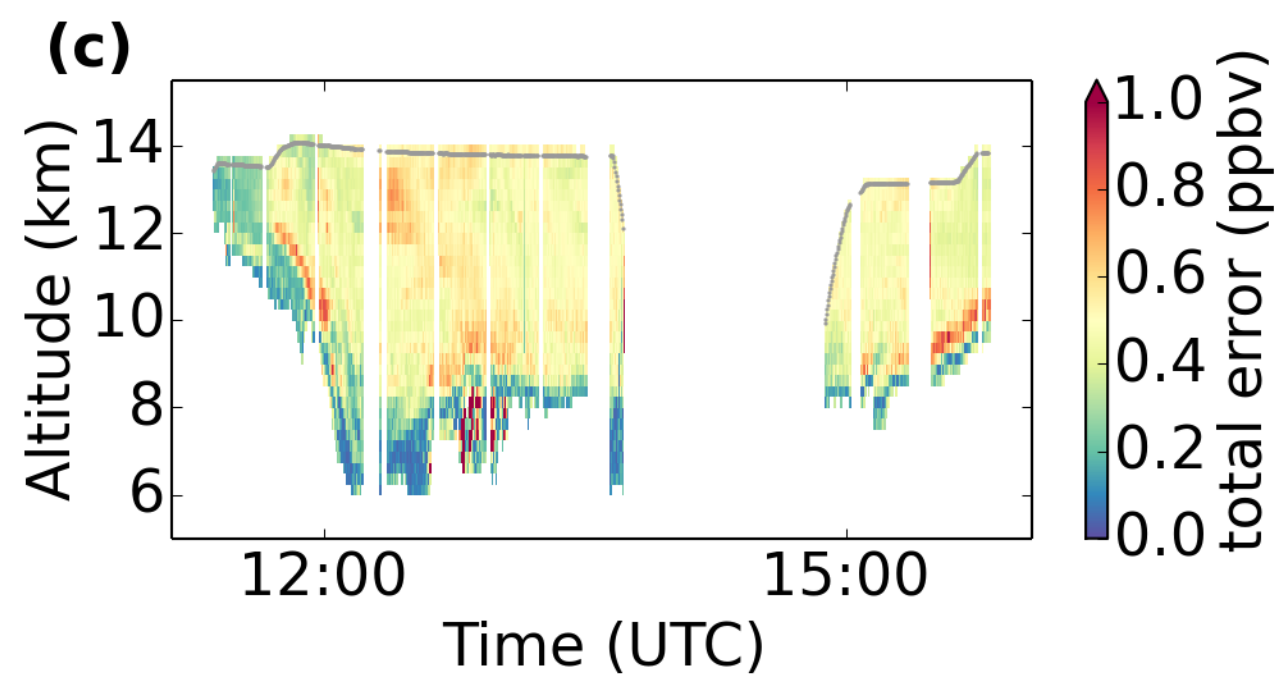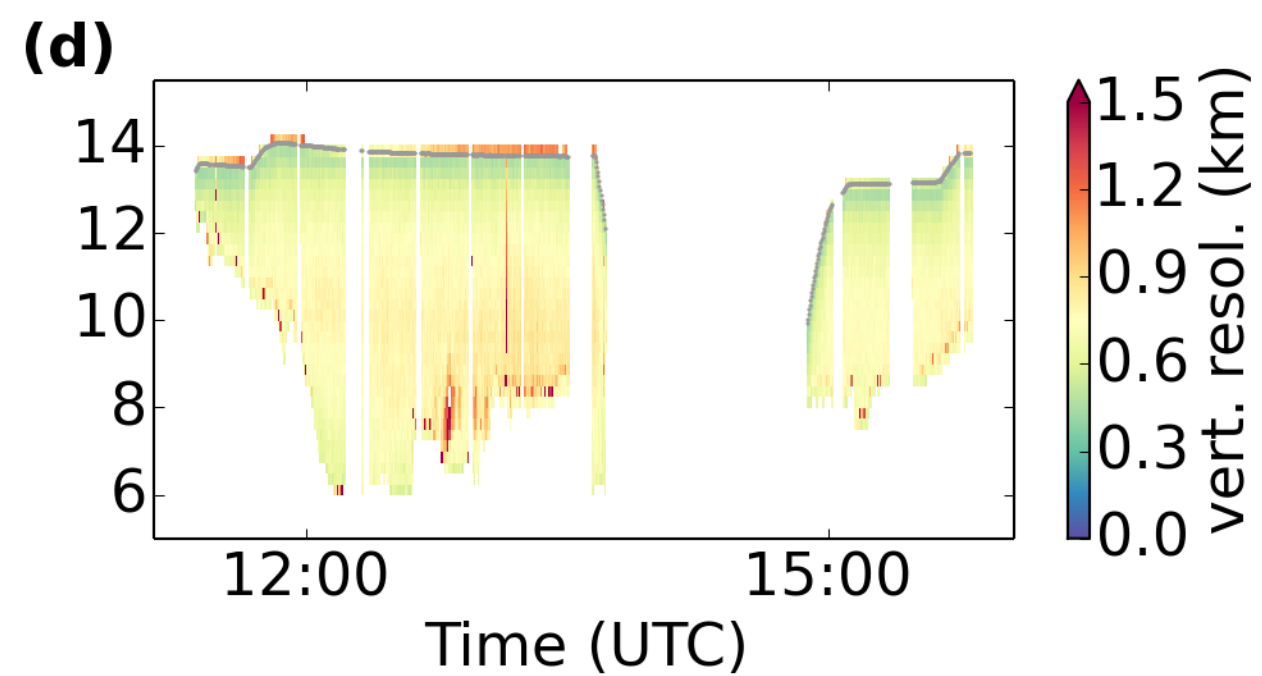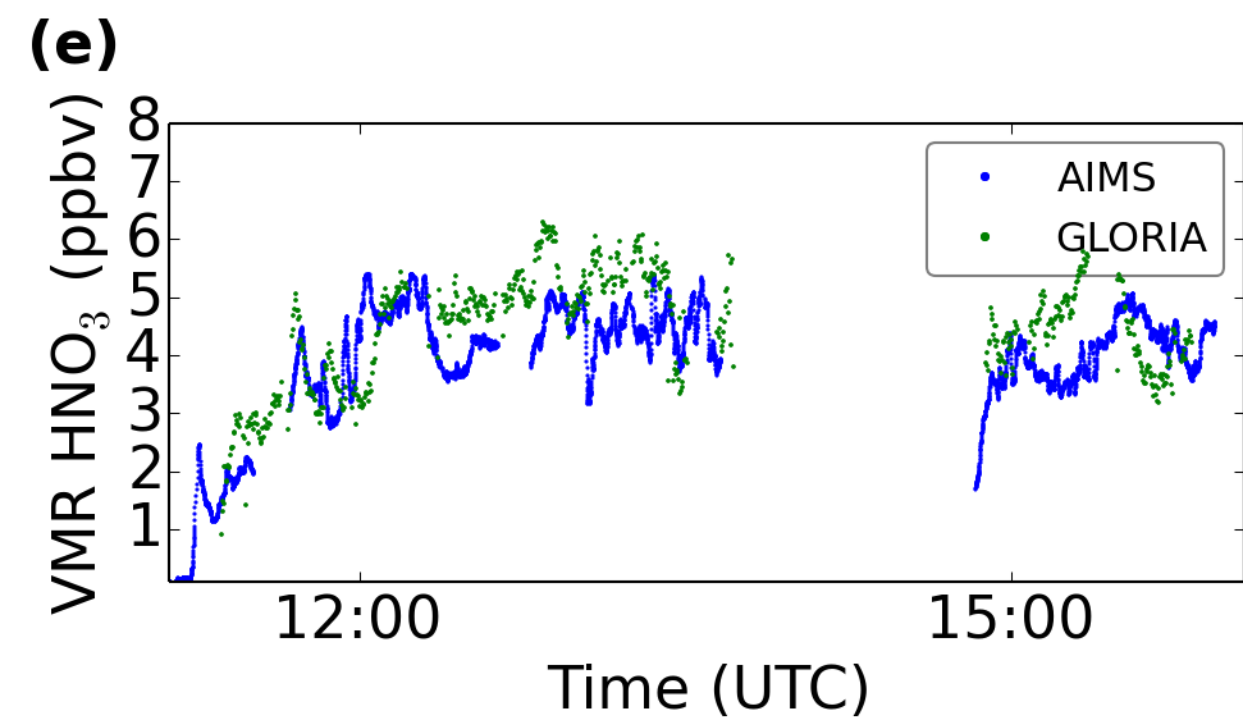

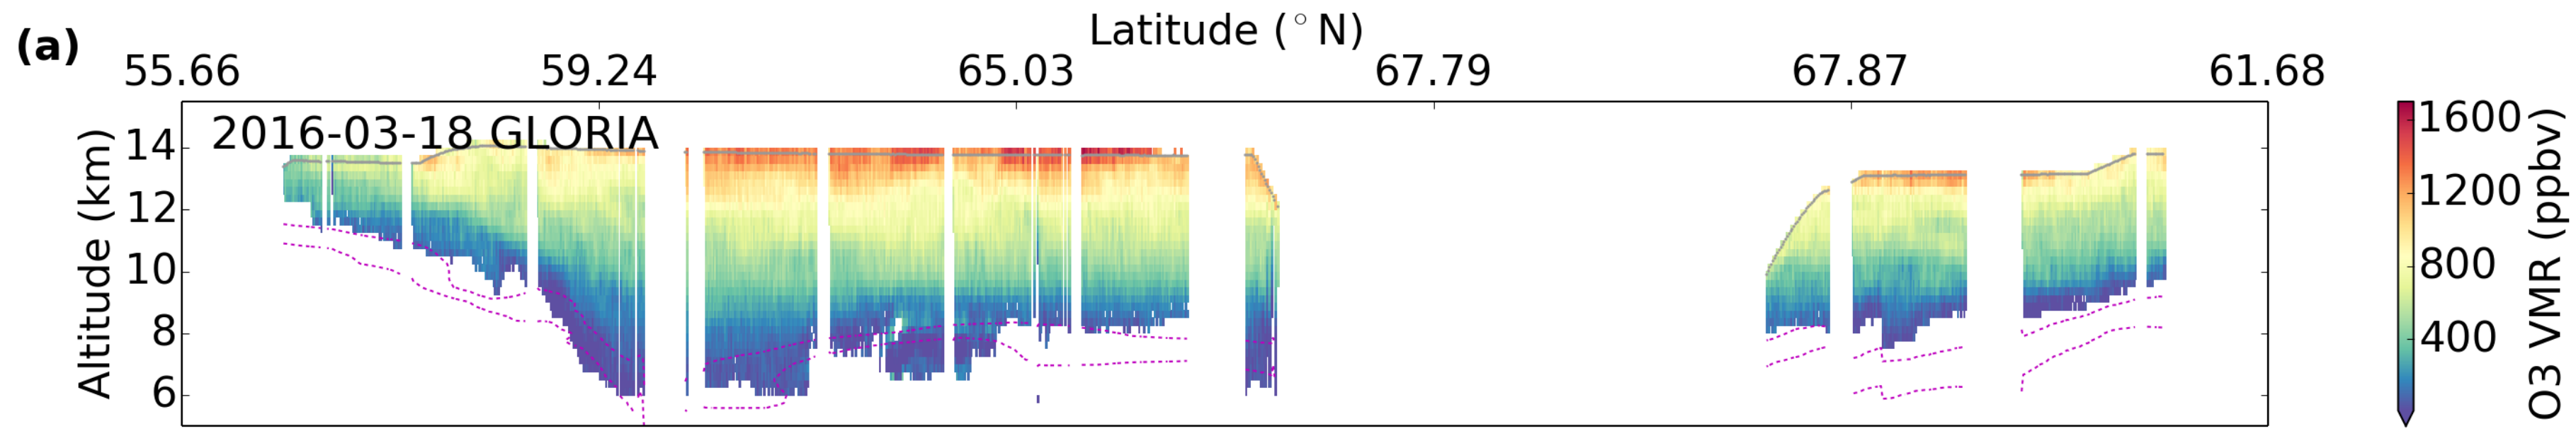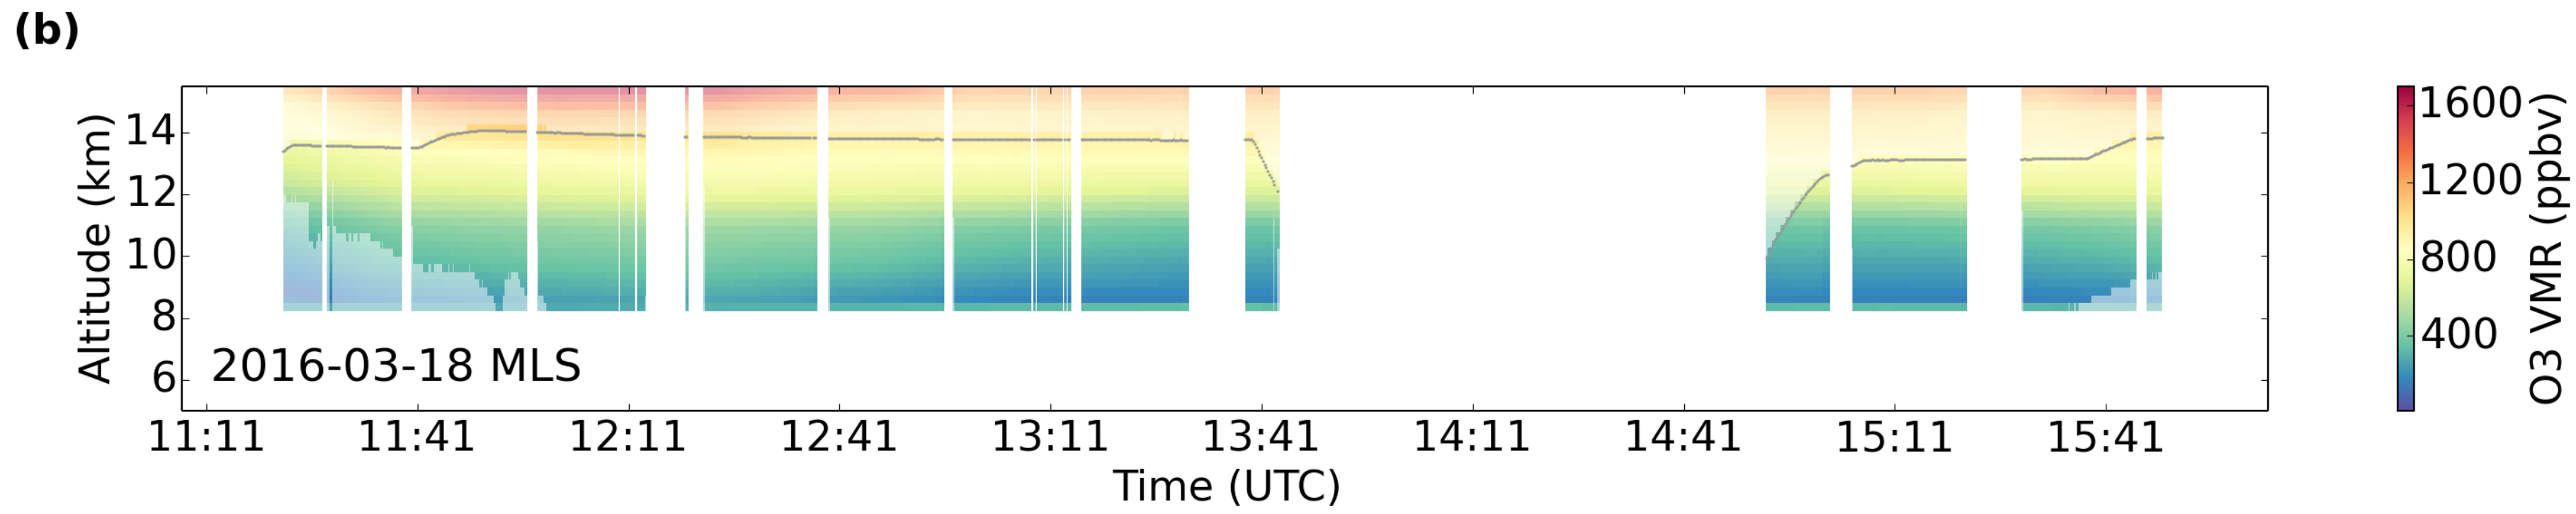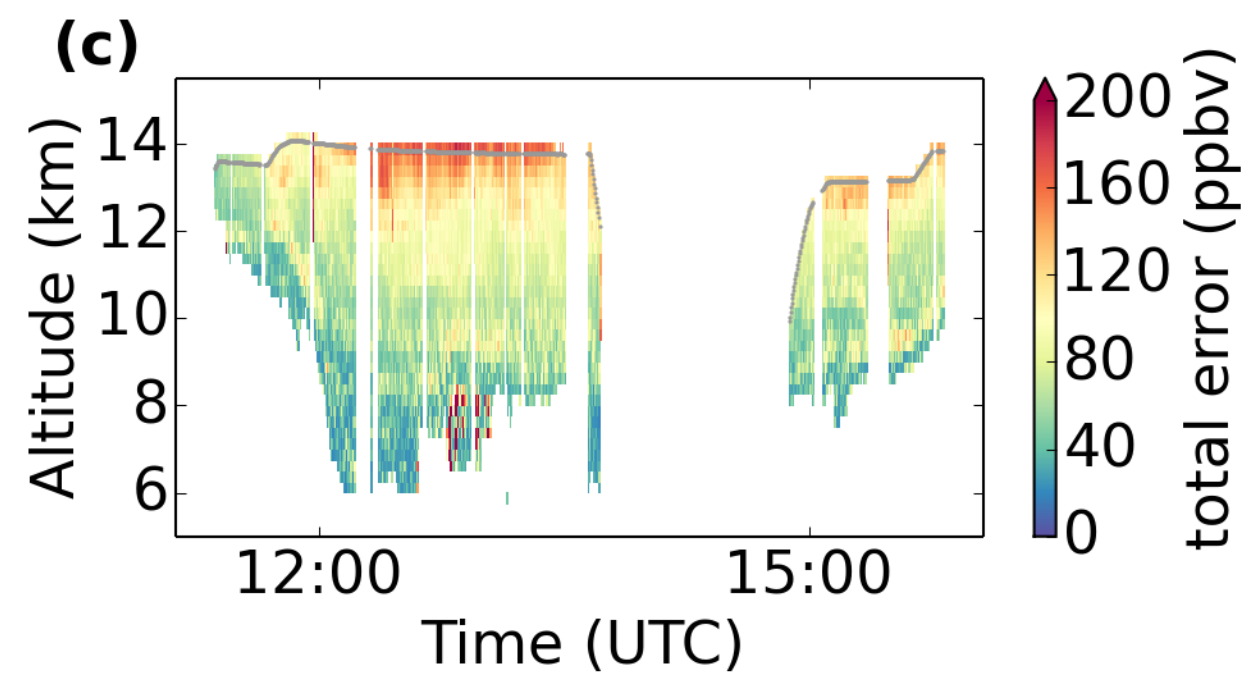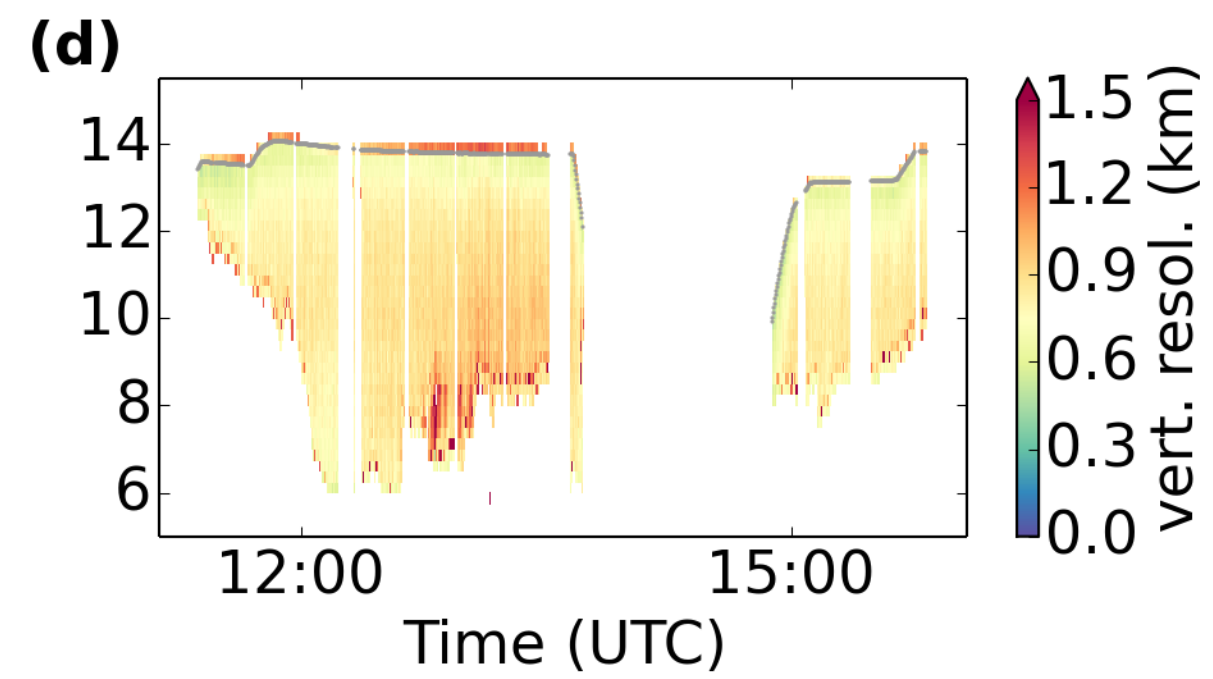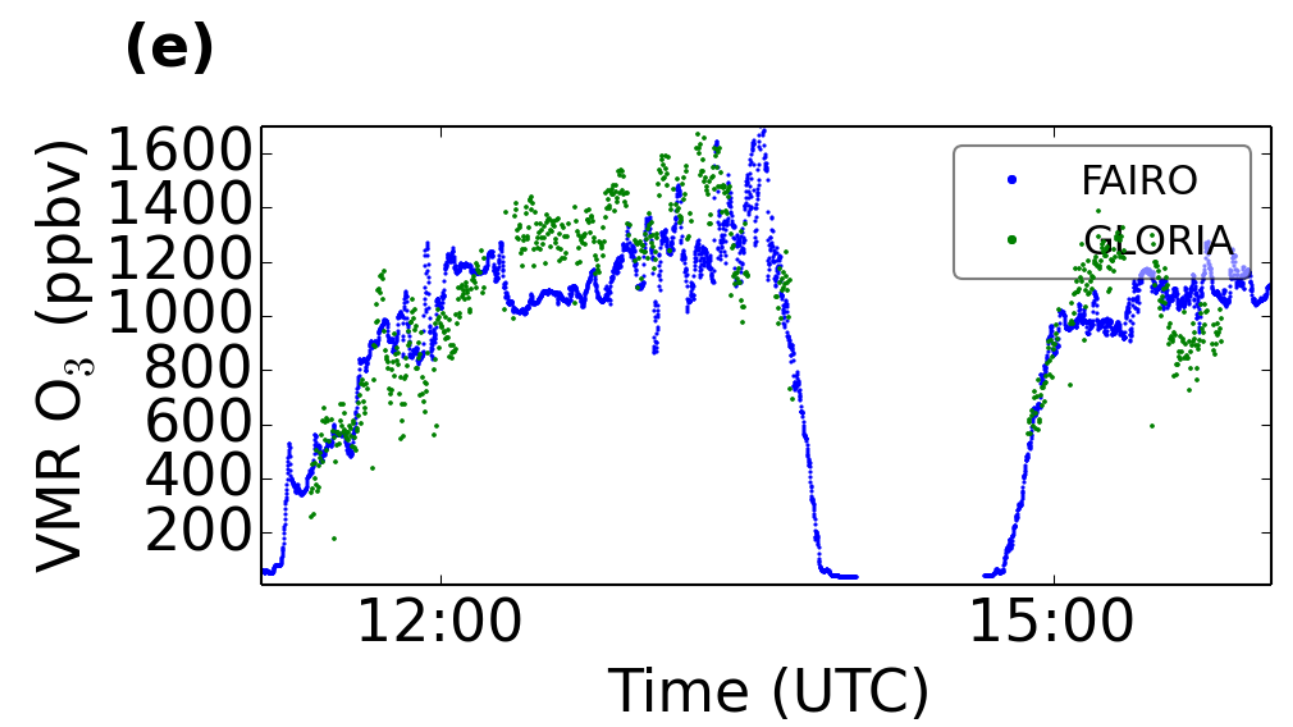



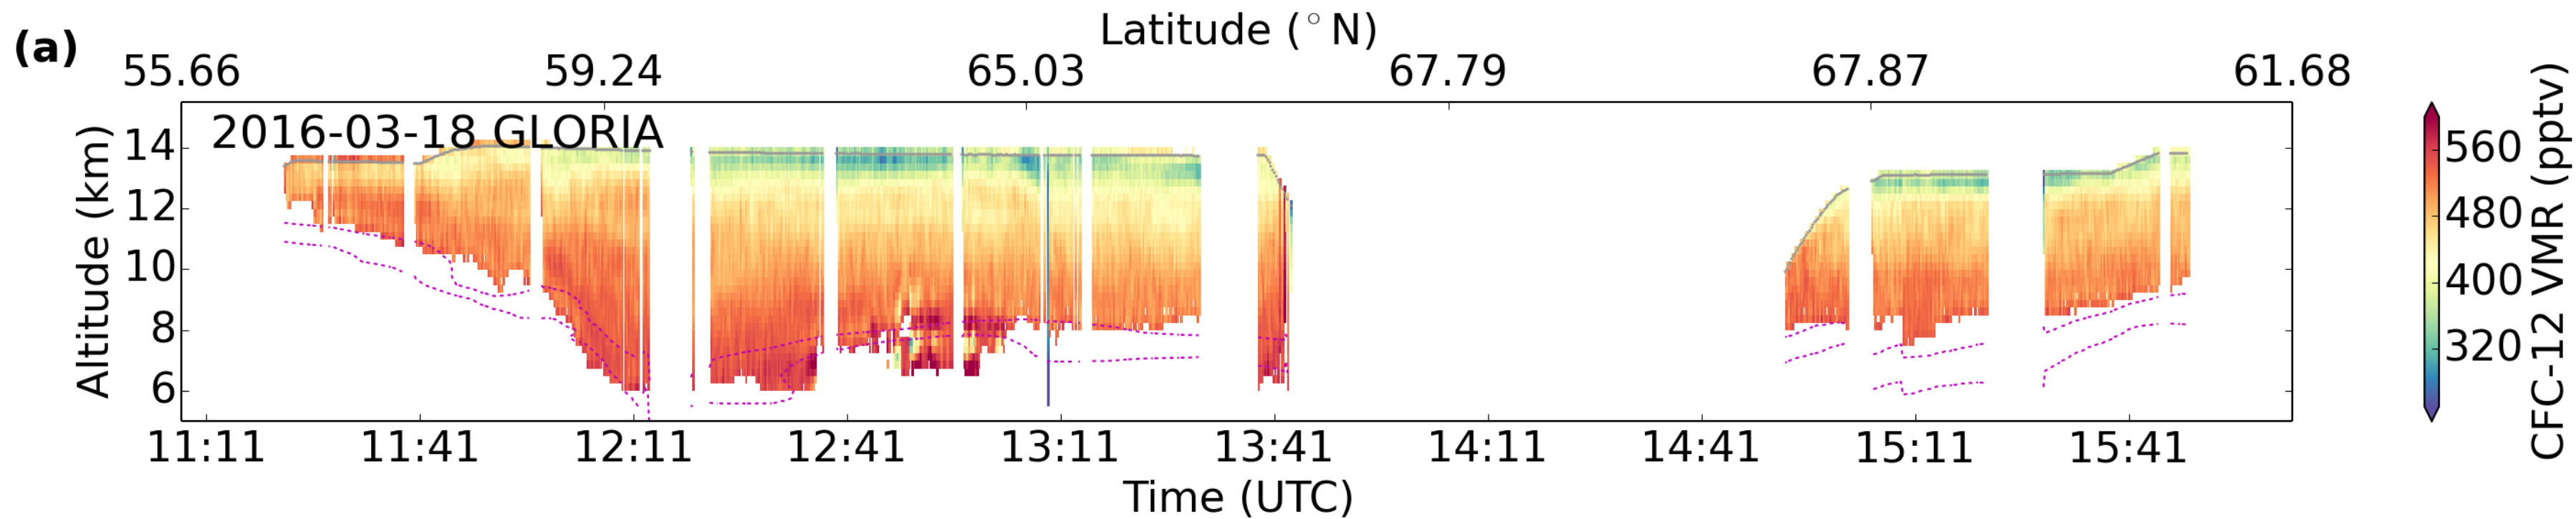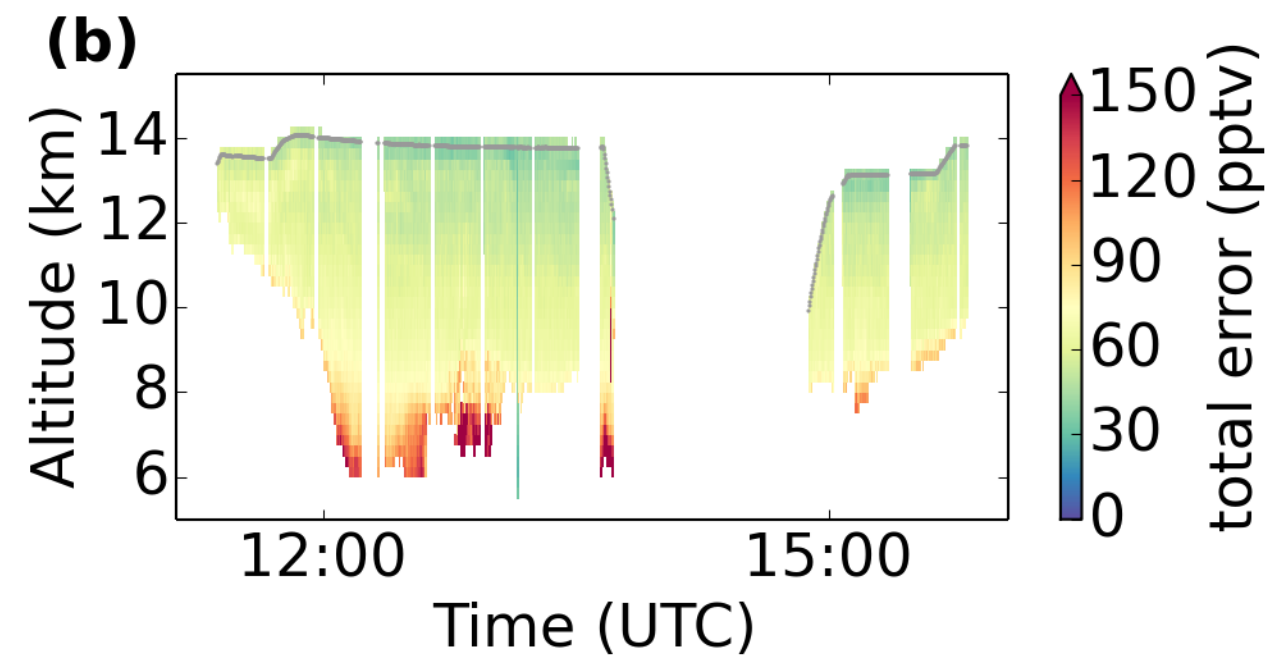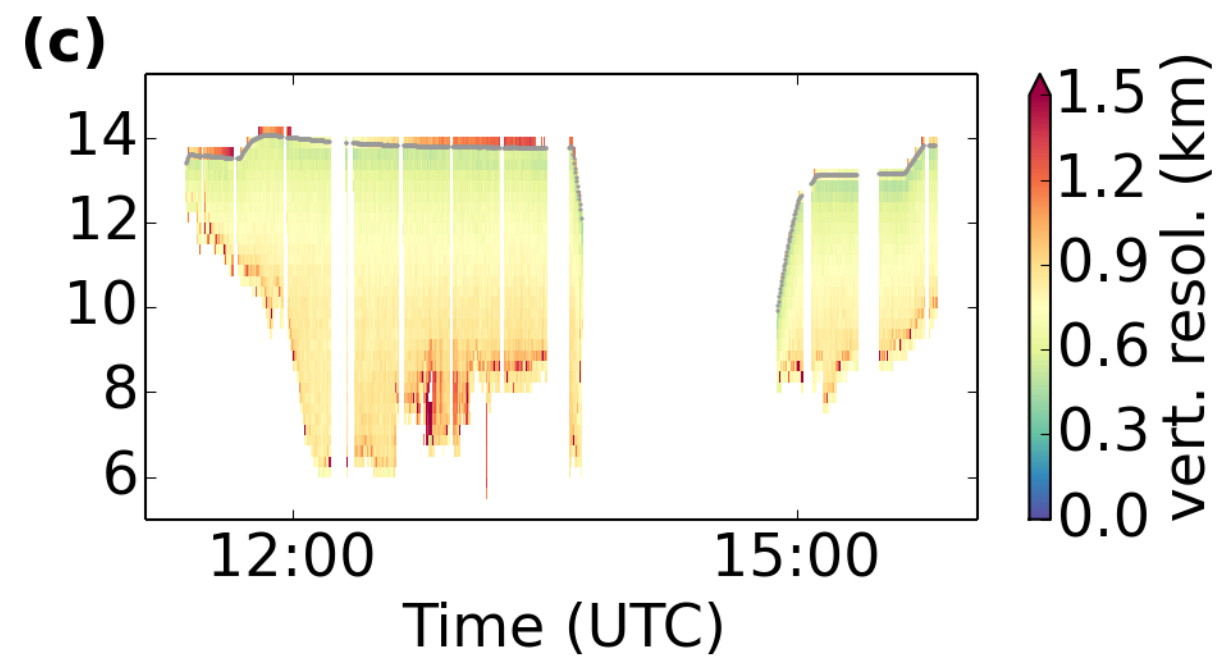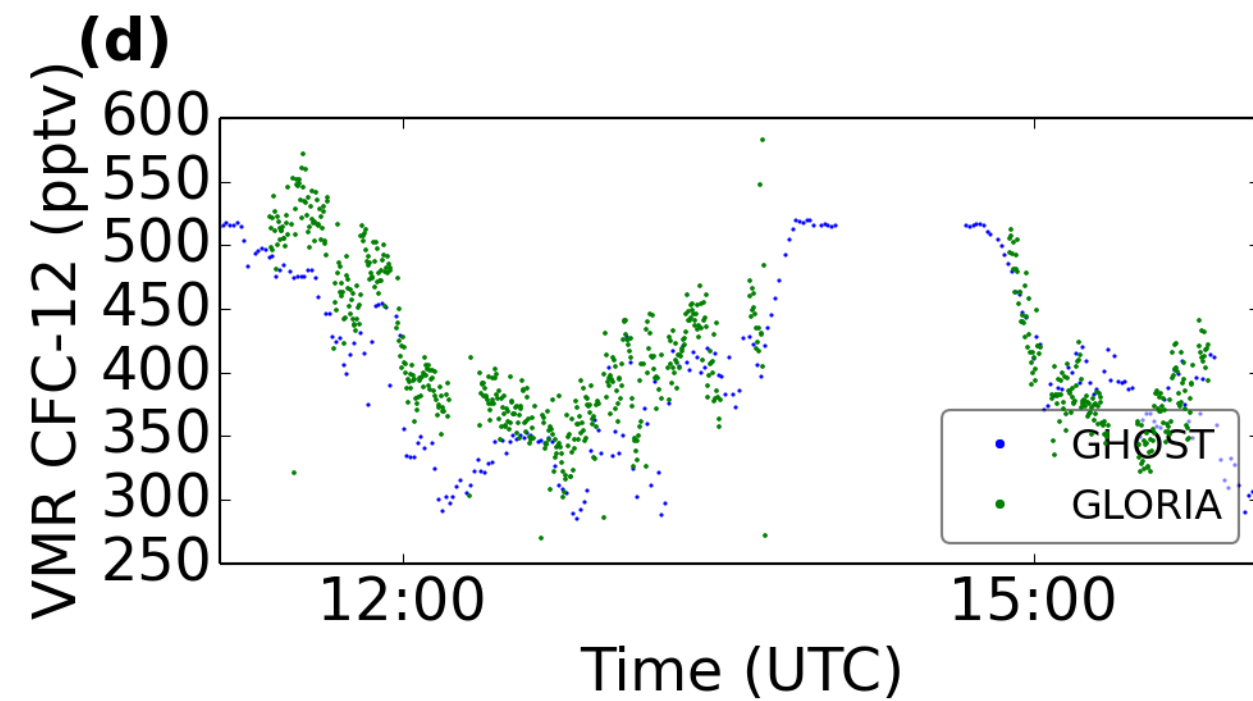

Supplement: Supplementary file 1 [file amt-11-4737-2018-supplement.pdf]
